# Supplementary material for: High-Resolution Temporal Response Patterns to Influenza Vaccine Reveal a Distinct Human Plasma Cell Gene Signature
Source: PubMed Central journal article supplement — Sci Rep. 2013 Jul 31;3:2327. doi: 10.1038/srep02327 (PMC3728595; doi:10.1038/srep02327), 2013-07-31
Supplement: srep02327-s1.pdf [file srep02327-s1.pdf]

## **Supplementary Information**

### **A Distinct Human Plasma Cell Gene Signature in High-Resolution Temporal Response Patterns to Influenza Vaccine**

Alicia D. Henn<sup>1, 2, †</sup>, Shuang Wu<sup>2, 3, 4, †</sup>, Xing Qiu<sup>2, 3, 4</sup>, Melissa Ruda<sup>1, 2</sup>, Michael Stover<sup>2, 3, 4</sup>,  
Hongmei Yang<sup>2, 3, 4</sup>, Zhiping Liu<sup>2, 3, 4</sup>, Stephen L. Welle<sup>2, 5</sup>, Jeanne Holden-Wiltse<sup>2, 3, 4</sup>, Hulin  
Wu<sup>2, 3, 4</sup>, Martin S. Zand<sup>1, 2\*</sup>

<sup>1</sup>Department of Medicine, Division of Nephrology, <sup>2</sup>Center for Biodefense Immune Modeling, <sup>3</sup>Department of Biostatistics and Computational Biology, <sup>4</sup>Center for Integrative Bioinformatics and Experimental Mathematics, <sup>5</sup>Functional Genomics Center, University of Rochester School of Medicine and Dentistry, Rochester, New York, USA. † Contributed equally to the manuscript.

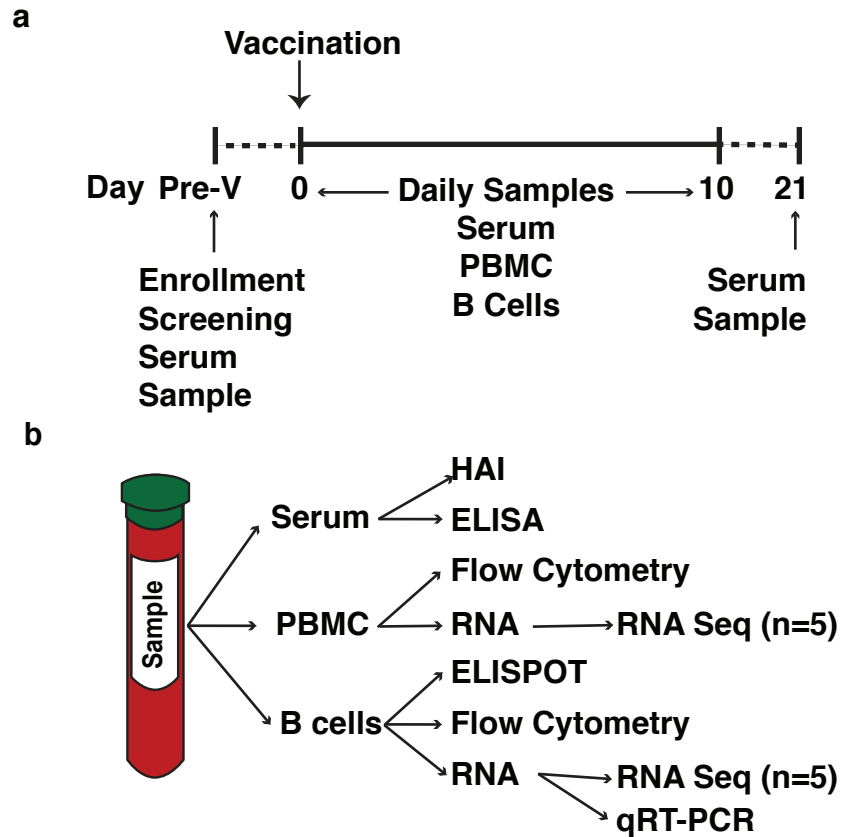

### Supplementary Figure S1. High-Frequency Sampling Post-Vaccination

Peripheral blood was collected from 14 normal human volunteers in three cohorts over three consecutive months. Blood was collected prior to vaccination as well as days 0 to 10 after vaccination with FluLaval 2010 Influenza Trivalent Inactivated Vaccine. Blood was immediately processed into serum, PBMC and Bc-enriched samples. Cells were further separated into samples for RNA, flow cytometric analysis, and ELISPOT analysis. HAI and ELISA assays were performed on all serum samples. With daily sampling of subjects over 11 days and 7 assays, a total of 880 samples were analyzed. RNA from one cohort of five subjects was used for RNA Seq analysis with eight RNA samples reserved for qRT-PCR. RNA from one subject (S01) was used for pilot RNA Seq studies.

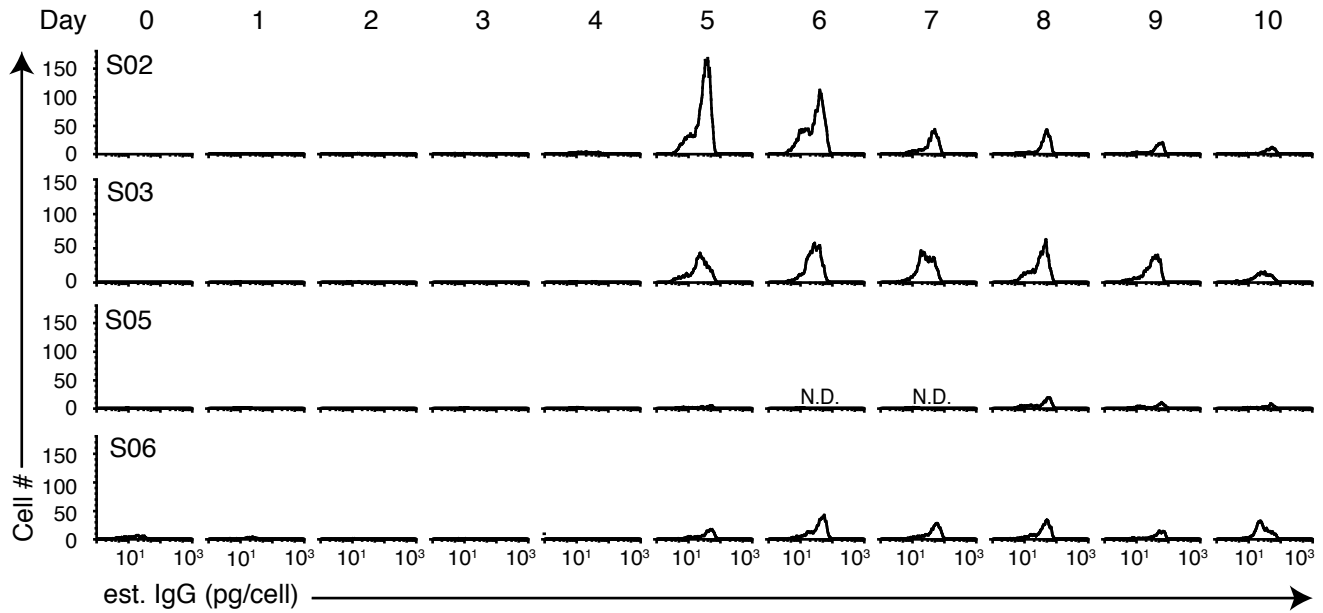

**Supplementary Figure S2. Semi-quantitative ELISPOT analysis of vaccine-specific IgG secretion.**

Enriched B cell samples were assessed for vaccine-specific IgG secreting cells (ASC) as published previously (Henn, et al. 2009). The typical bimodal secretion pattern of activated ASC was seen. The dynamics of high-rate vaccine-specific ASC paralleled plasmablast and plasma cell phenotype changes over the course of the study. Subject S02 had peak numbers of vaccine-specific ASC on day 05, earlier than subjects S03 and S06. (N.D. = no data)

| Subject ID | Age | Sex           | Seasonal 2007          | Seasonal 2008       | Seasonal 2009       | Monovalent 2009      | Seasonal 2010 (Study)                        |
|------------|-----|---------------|------------------------|---------------------|---------------------|----------------------|----------------------------------------------|
| S01        | 43  | M             | V                      | V                   | V                   |                      |                                              |
| S02        | 20  | F             | V                      | V                   | V                   | V                    |                                              |
| S03        | 27  | M             |                        | V                   | V                   |                      |                                              |
| S04        | 47  | F             |                        | V                   | V                   |                      |                                              |
| S05        | 23  | M             |                        |                     |                     |                      |                                              |
| S06        | 36  | F             |                        |                     |                     |                      |                                              |
| S07        | 44  | F             | V                      | V                   | V                   | V                    |                                              |
| S08        | 22  | F             |                        |                     | V                   | V                    |                                              |
| S09        | 22  | F             | V                      |                     |                     |                      |                                              |
| S10        | 20  | M             |                        | V                   | V                   | V                    |                                              |
| S11        | 27  | M             | V                      | V                   |                     |                      |                                              |
| S12        | 43  | F             | V                      | V                   | V                   |                      |                                              |
| S13        | 21  | M             | V                      | V                   | V                   | V                    |                                              |
| S14        | 36  | M             |                        | V                   | V                   | V                    |                                              |
|            |     | <b>A/H1N1</b> | A/Solomon Isl. /3/2006 | A/Brisbane /59/2007 | A/Brisbane /59/2007 | A/California /7/2009 | A/California /7/2009                         |
|            |     | <b>A/H3N2</b> | A/Wisconsin /6/2005    | A/Brisbane /10/2007 | A/Brisbane /10/2007 | –                    | A/Victoria /210/2009 (like A/Perth /16/2009) |
|            |     | <b>B</b>      | B/Malaysia /2506/2004  | B/Florida /4/2006   | B/Brisbane /60/2008 | –                    | B/Brisbane /60/2008                          |

### Supplementary Table S1. Study Participant Demographic and Vaccine Characteristics.

Fourteen human subjects were enrolled in three cohorts for this study. Three additional consenting subjects did not meet all of the study inclusion criteria. Subjects ranged in age from 20 to 47 years with equal numbers of each male and female. Blank spaces indicate a report of no vaccination that year. Two subjects, S05 and S06 reported no influenza vaccination in the previous three years. Half of the subjects had received the 2009 monovalent vaccine, which matched the A/California virus in the study vaccine. Ten of the subjects reported vaccination with the seasonal 2009 vaccine, which shared B/Brisbane with the study vaccine. Subject ID numbers were re-encoded for publication.

*Supplementary Table S2. Post-vaccination serum changes in vaccine-specific antibody levels.* Serum titers for vaccine antigens generally increased over the course of the study. Some subjects had high-level pre-vaccination immunity (S10 to A/California and A/Perth, S02 to A/California). Subject sera that did not show an increase significantly in response to vaccine include S12 (B/Brisbane), S08 and S13 (A/Perth, B/Brisbane). S02 increased in titer to A/Perth and B/Brisbane earlier than the other subjects. Vaccine-specific IgM as measured by ELISA increased significantly in all subjects except S12. IgG specific for vaccine increased significantly in all subjects except S03 and S13, which had high concentrations of vaccine-specific IgG at Day 00.

| Subject | A/Calif. HAI Titre  |         | A/Perth HAI Titre   |         | B/Brisb. HAI Titre  |         | Anti-vaccine IgM    |         | Anti-vaccine IgG    |         | Anti-vaccine IgA    |         |
|---------|---------------------|---------|---------------------|---------|---------------------|---------|---------------------|---------|---------------------|---------|---------------------|---------|
|         | Day 50%<br>Increase | p-value |
| S01     | -                   | NS      | 7                   | 0.0024  | 7                   | 0.0008  | 8                   | 0.0002  | 8                   | <0.0001 | 1                   | 0.0108  |
| S02     | -                   | NS      | 5                   | 0.0001  | 6                   | 0.0015  | 6                   | <0.0001 | 6                   | 0.0001  | 6                   | <0.0001 |
| S03     | 7                   | 0.0014  | -                   | NS      | 7                   | 0.0224  | 8                   | 0.0021  | -                   | NS      | 8                   | 0.0003  |
| S04     | 7                   | <0.0001 | 7                   | <0.0001 | -                   | NS      | 8                   | 0.0066  | 8                   | 0.0025  | 1                   | 0.0211  |
| S05     | 8                   | 0.0002  | 9                   | <0.0001 | 8                   | 0.0017  | 8                   | 0.0007  | 8                   | 0.0001  | 8                   | 0.0002  |
| S06     | 7                   | 0.0002  | 8                   | 0.0122  | 7                   | <0.0001 | 8                   | 0.0048  | 8                   | 0.0008  | 7                   | 0.0009  |
| S07     | -                   | NS      | -                   | NS      | 7                   | 0.0396  | 7                   | 0.0017  | 8                   | 0.0269  | -                   | NS      |
| S08     | 7                   | 0.0003  | -                   | NS      | -                   | NS      | 8                   | 0.0001  | 7                   | 0.0061  | 6                   | 0.001   |
| S09     | 8                   | 0.0361  | 6                   | 0.0002  | 7                   | 0.0028  | 7                   | 0.0001  | 6                   | 0.0037  | 7                   | 0.0031  |
| S10     | -                   | NS      | -                   | NS      | -                   | NS      | 8                   | 0.0099  | 8                   | 0.0017  | 8                   | 0.0001  |
| S11     | 8                   | 0.0005  | 8                   | 0.0122  | 8                   | 0.0044  | 8                   | 0.0017  | 8                   | 0.0007  | -                   | NS      |
| S12     | 7                   | 0.002   | 7                   | 0.0005  | 6                   | 0.0068  | -                   | NS      | 7                   | 0.0074  | 7                   | 0.0005  |
| S13     | 7                   | 0.0024  | -                   | NS      | -                   | NS      | 8                   | 0.0234  | -                   | NS      | 7                   | 0.0024  |
| S14     | 8                   | 0.0115  | 8                   | 0.0007  | 9                   | 0.017   | 8                   | 0.0097  | 8                   | 0.0023  | 7                   | 0.0007  |

*Supplementary Table S3. Genes Significantly Changed as Measured by RNA Seq. Functional Principal Component Analysis (FPCA)* was used to estimate gene expression curves and the list of significant genes was chosen based on a permutation test and adjusted with multiple test correction, FDR=0.05. Subject S02 had the largest number of genes that varied significantly over time (5580 genes).

S06 had few with only 2 significant genes, so for better comparisons, 1600 of the genes with the highest signal to noise ratio were added. After a 1.2-fold-change filter, S02 had 5256, S03 had 1309, S04 had 2147 genes, S05 had 1603 significantly varying genes. S06 had 1053 genes in the analysis.

|      | S02         |           | S03         |           | S04         |           | S05         |           | S06         |           |
|------|-------------|-----------|-------------|-----------|-------------|-----------|-------------|-----------|-------------|-----------|
| Rank | Gene Symbol | adj p-val |
| 1    | ACADM       | 0.002     | DDOST       | <0.001    | PABPC4      | <0.001    | PRR5        | 0.001     | TPT1        | 0.047     |
| 2    | WNT5B       | 0.002     | SEMA4A      | <0.001    | PHGDH       | <0.001    | PFN1        | 0.003     | SYNE1       | 0.047     |
| 3    | IGHG3       | 0.002     | SLAMF7      | <0.001    | KCNN3       | <0.001    | ECH1        | 0.003     | RPS7        | 0.053     |
| 4    | IGHG1       | 0.002     | ERLEC1      | <0.001    | SLAMF7      | <0.001    | PHIP        | 0.003     | FER1L4      | 0.053     |
| 5    | PSAT1       | 0.002     | ITM2C       | <0.001    | ERLEC1      | <0.001    | EEF2        | 0.003     | IGHG1       | 0.058     |
| 6    | CD27        | 0.003     | HDLBP       | <0.001    | INPP4A      | <0.001    | RPS15       | 0.003     | SLCO3A1     | 0.093     |
| 7    | SLC33A1     | 0.003     | NT5DC2      | <0.001    | PDK1        | <0.001    | RPL8        | 0.003     | CCR2        | 0.093     |
| 8    | SAR1B       | 0.003     | SPCS1       | <0.001    | ITM2C       | <0.001    | C12orf5     | 0.003     | RPL34       | 0.093     |
| 9    | FER1L4      | 0.003     | CD38        | <0.001    | EDEM1       | <0.001    | RPL29       | 0.003     | RPL27A      | 0.093     |
| 10   | FKBP2       | 0.003     | ELL2        | <0.001    | FNDC3B      | <0.001    | DDAH2       | 0.003     | SEMA3G      | 0.093     |
| 11   | LARP1B      | 0.003     | SEC24A      | <0.001    | SEL1L3      | <0.001    | FAM91A1     | 0.003     | TTC39B      | 0.093     |
| 12   | RAB1A       | 0.003     | SIL1        | <0.001    | SCARB2      | <0.001    | C16orf42    | 0.003     | LOC401397   | 0.093     |
| 13   | GALM        | 0.003     | MZB1        | <0.001    | RAP1GDS1    | <0.001    | HLA-A       | 0.003     | PARP14      | 0.093     |
| 14   | ACP2        | 0.003     | LMAN2       | <0.001    | MZB1        | <0.001    | IGHG3       | 0.003     | CD38        | 0.093     |
| 15   | EDEM1       | 0.003     | SSR1        | <0.001    | C6orf129    | <0.001    | MIF         | 0.003     | C9orf140    | 0.093     |
| 16   | RPL36AL     | 0.003     | TXNDC5      | <0.001    | MANEA       | <0.001    | ITM2C       | 0.003     | ATP6V1G1    | 0.093     |
| 17   | DLGAP4      | 0.003     | ATXN1       | <0.001    | CITED2      | <0.001    | CD74        | 0.003     | MDC1        | 0.093     |
| 18   | SRPRB       | 0.003     | MAN1A1      | <0.001    | CAV1        | <0.001    | SYNGR2      | 0.003     | C5orf56     | 0.093     |
| 19   | KANK1       | 0.003     | GLCC1       | <0.001    | NUCB2       | <0.001    | RPL13       | 0.003     | PCYT1A      | 0.093     |
| 20   | PRR12       | 0.003     | CAV1        | <0.001    | CD27        | <0.001    | PEX16       | 0.003     | INSR        | 0.093     |
| 21   | SGK1        | 0.003     | PDIA4       | <0.001    | IGHA1       | <0.001    | LAT         | 0.003     | B2M         | 0.099     |
| 22   | SSR4        | 0.003     | GGH         | <0.001    | IDH2        | <0.001    | SMEK2       | 0.003     | XBP1        | 0.099     |
| 23   | WIP1        | 0.003     | SLC44A1     | <0.001    | SELS        | <0.001    | SAMD9L      | 0.003     | AGPAT1      | 0.101     |
| 24   | KLHL36      | 0.003     | CD27        | <0.001    | BCKDK       | <0.001    | APRT        | 0.003     | IGHA1       | 0.101     |
| 25   | MCEE        | 0.003     | FKBP11      | <0.001    | C17orf28    | <0.001    | SHISA5      | 0.003     | PFDN5       | 0.101     |
| 26   | RGS16       | 0.003     | SPATS2      | <0.001    | PYCR1       | <0.001    | IGHG1       | 0.003     | COMMMD7     | 0.106     |
| 27   | FNDC3B      | 0.003     | HSP90B1     | <0.001    | KCNK6       | <0.001    | EIF3G       | 0.003     | LOC90784    | 0.106     |
| 28   | MAPKBP1     | 0.003     | ERP29       | <0.001    | HSPA13      | <0.001    | RPS2        | 0.003     | EML4        | 0.106     |
| 29   | SEC31A      | 0.003     | ALG5        | <0.001    | CECR1       | <0.001    | SAR1B       | 0.004     | MIR650      | 0.110     |
| 30   | TM9SF1      | 0.003     | TMED10      | <0.001    | PRDX4       | <0.001    | ZDHHHC21    | 0.004     | WHSC1       | 0.110     |
| 31   | RAPGEF2     | 0.003     | IGHG1       | <0.001    | SSR4        | <0.001    | CRIP1       | 0.004     | B4GALT1     | 0.110     |
| 32   | CLINT1      | 0.003     | IGHG3       | <0.001    | IGJ         | <0.001    | THUMPD1     | 0.004     | SNTB2       | 0.110     |
| 33   | USO1        | 0.003     | PPIB        | <0.001    | RAPGEF5     | <0.001    | DNAL1       | 0.004     | UNC13B      | 0.110     |
| 34   | SLAMF7      | 0.003     | IDH2        | <0.001    | CHPF        | <0.001    | CEP110      | 0.004     | GAS5        | 0.110     |
| 35   | LAMC1       | 0.003     | TXNDC11     | <0.001    | LRPAP1      | <0.001    | ZBTB44      | 0.004     | PERP        | 0.110     |
| 36   | ITFG2       | 0.003     | NOMO2       | <0.001    | DNAJB9      | <0.001    | MRPL38      | 0.004     | NDUFB5      | 0.110     |
| 37   | NUCB2       | 0.003     | SEC11C      | <0.001    | DENND5B     | <0.001    | RPS5        | 0.004     | NSA2        | 0.110     |
| 38   | TRIB1       | 0.003     | EDEM2       | <0.001    | MBNL2       | <0.001    | PHTF2       | 0.004     | IL17RA      | 0.110     |
| 39   | SELK        | 0.003     | ERGIC3      | <0.001    | NOMO1       | <0.001    | GLTSCR2     | 0.004     | LAMC1       | 0.110     |
| 40   | MZB1        | 0.003     | RPN2        | <0.001    | CMIP        | <0.001    | MAF1        | 0.004     | TLR2        | 0.110     |
| 41   | ERLEC1      | 0.003     | XBP1        | <0.001    | KDELR1      | <0.001    | OSGEP1      | 0.004     | ZNF767      | 0.110     |
| 42   | GUSB        | 0.003     | PRDX4       | <0.001    | ZBP1        | <0.001    | CD81        | 0.004     | IGHM        | 0.110     |
| 43   | CDV3        | 0.003     | B4GALT3     | <0.001    | PINK1       | <0.001    | SAMD9       | 0.004     | PIGT        | 0.110     |
| 44   | ANKRD36BP2  | 0.003     | CHPF        | <0.001    | GLB1        | <0.001    | RBM38       | 0.004     | FBXO34      | 0.110     |
| 45   | RCBTB2      | 0.003     | P4HB        | <0.001    | CDV3        | <0.001    | PPIG        | 0.004     | IGLL5       | 0.110     |
| 46   | TMED5       | 0.003     | GALNT2      | <0.001    | UCHL1       | <0.001    | CD79A       | 0.004     | CD80        | 0.118     |
| 47   | SLC16A14    | 0.003     | UBE2J1      | <0.001    | GOLPH3      | <0.001    | ZNF358      | 0.005     | CIB1        | 0.123     |
| 48   | ARFGAP3     | 0.003     | CCNC        | <0.001    | SEC24A      | <0.001    | EZR         | 0.005     | NEU1        | 0.124     |
| 49   | LAX1        | 0.003     | BHLHA15     | <0.001    | IGLL1       | <0.001    | ICAM3       | 0.005     | MAP1LC3B    | 0.125     |
| 50   | TSHR        | 0.003     | FAM171A1    | <0.001    | TPST2       | <0.001    | FAM53B      | 0.005     | KIAA1908    | 0.125     |
| 51   | SEL1L3      | 0.003     | NOMO1       | <0.001    | ZMPSTE24    | <0.001    | COL4A3BP    | 0.005     | CD200R1     | 0.132     |
| 52   | SKI         | 0.003     | RRBP1       | <0.001    | FAM46C      | <0.001    | PTPN22      | 0.005     | CXCR3       | 0.132     |
| 53   | SEL1L       | 0.003     | HM13        | <0.001    | PPP2R5A     | <0.001    | CGGBP1      | 0.005     | BSG         | 0.132     |
| 54   | CTSO        | 0.003     | IGLL5       | <0.001    | ZBTB38      | <0.001    | LSM10       | 0.005     | ATP5E       | 0.132     |
| 55   | TM9SF3      | 0.003     | EAF2        | <0.001    | WFS1        | <0.001    | UGGT1       | 0.005     | SLC11A2     | 0.134     |
| 56   | ARHGAP42    | 0.003     | RPN1        | <0.001    | LMBRD2      | <0.001    | TEX264      | 0.005     | EPM2AIP1    | 0.135     |
| 57   | NEK8        | 0.003     | FNDC3B      | <0.001    | SIL1        | <0.001    | MCM5        | 0.006     | CLPTM1L     | 0.135     |
| 58   | TXNDC15     | 0.003     | WFS1        | <0.001    | NEU1        | <0.001    | HLA-DQB2    | 0.006     | PLEKHA7     | 0.135     |
| 59   | MTHFD2      | 0.003     | TRAM1       | <0.001    | RRAGD       | <0.001    | RPLP2       | 0.006     | ATOX1       | 0.139     |
| 60   | MOXD1       | 0.003     | TNFRSF17    | <0.001    | BHLHA15     | <0.001    | LSP1        | 0.006     | ZNF207      | 0.139     |
| 61   | IGF1        | 0.003     | LMAN1       | <0.001    | OAF         | <0.001    | RAB1B       | 0.006     | COL6A2      | 0.140     |
| 62   | PDIA5       | 0.003     | PSMD8       | <0.001    | ERN1        | <0.001    | PTPRCAP     | 0.006     | CPXM1       | 0.141     |

|     |          |       |            |        |          |        |          |       |          |       |
|-----|----------|-------|------------|--------|----------|--------|----------|-------|----------|-------|
| 63  | HEXB     | 0.003 | ISOC2      | <0.001 | ATF5     | <0.001 | ATP7A    | 0.006 | AHI1     | 0.141 |
| 64  | YIPF1    | 0.003 | FAM46C     | <0.001 | DERL3    | <0.001 | DNAJC10  | 0.006 | NBEAL2   | 0.141 |
| 65  | SPCS3    | 0.003 | PREB       | <0.001 | NT5DC2   | <0.001 | PPP2R4   | 0.006 | FLJ44606 | 0.141 |
| 66  | PIK3C2B  | 0.003 | PDIA5      | <0.001 | HDLBP    | <0.001 | DOPEY1   | 0.006 | ATP2B4   | 0.142 |
| 67  | TRAM1    | 0.003 | SEL1L3     | <0.001 | SELK     | <0.001 | CCDC71   | 0.006 | INPP1    | 0.142 |
| 68  | CASP10   | 0.003 | TMED9      | <0.001 | GLRX     | <0.001 | DDX1     | 0.006 | SH3BP2   | 0.142 |
| 69  | HEATR6   | 0.003 | TRAM2      | <0.001 | TXNDC15  | <0.001 | TNPO1    | 0.006 | PLEKHG3  | 0.142 |
| 70  | GLG1     | 0.003 | MOXD1      | <0.001 | EPB41L2  | <0.001 | VPS28    | 0.006 | THBS3    | 0.142 |
| 71  | MANEA    | 0.003 | RPS6KB2    | <0.001 | CREB3L2  | <0.001 | LSM7     | 0.006 | ILDR1    | 0.142 |
| 72  | LAP3     | 0.003 | CKAP4      | <0.001 | TRIB1    | <0.001 | IPMK     | 0.006 | CD48     | 0.142 |
| 73  | CYCS     | 0.003 | SEL1L      | <0.001 | PSAP     | <0.001 | POR      | 0.006 | LIPA     | 0.142 |
| 74  | GOLGA5   | 0.003 | SSR4       | <0.001 | FNDC3A   | <0.001 | FUZ      | 0.006 | VRK2     | 0.142 |
| 75  | DYNLRB1  | 0.003 | TXNDC15    | <0.001 | IFI35    | <0.001 | CROCC    | 0.006 | PSENE1   | 0.143 |
| 76  | CD38     | 0.003 | ATP5L      | <0.001 | WIPI1    | <0.001 | RPL36    | 0.006 | CENPO    | 0.143 |
| 77  | UAP1     | 0.003 | SRPR       | <0.001 | HM13     | <0.001 | VAT1     | 0.006 | SURF1    | 0.144 |
| 78  | SYNM     | 0.003 | SMOX       | <0.001 | ADA      | <0.001 | SMCHD1   | 0.006 | RPL39    | 0.144 |
| 79  | DERL3    | 0.003 | CRELD2     | <0.001 | WDR45    | <0.001 | ARHGAP5  | 0.007 | ATP8B2   | 0.144 |
| 80  | ZNF664   | 0.003 | STT3A      | <0.001 | TMED9    | <0.001 | FAM173A  | 0.007 | RPS3A    | 0.144 |
| 81  | MEI1     | 0.003 | SELK       | <0.001 | SEMA4A   | <0.001 | RAB11B   | 0.007 | ARHGAP31 | 0.144 |
| 82  | JSRP1    | 0.003 | SPCS3      | <0.001 | SLC7A11  | <0.001 | MAP2K3   | 0.007 | IRF4     | 0.144 |
| 83  | SSR3     | 0.003 | MANEA      | <0.001 | MGAT1    | <0.001 | CCDC22   | 0.007 | TTYH2    | 0.144 |
| 84  | OPRL1    | 0.003 | NDUFB8     | <0.001 | SGK1     | <0.001 | HLA-F    | 0.007 | TUBGCP5  | 0.144 |
| 85  | CAV1     | 0.003 | NUCB2      | <0.001 | CALU     | <0.001 | COX8A    | 0.007 | STARD9   | 0.144 |
| 86  | PRRC1    | 0.003 | SEC61A1    | <0.001 | ALDH1L2  | <0.001 | NOSIP    | 0.007 | DCLK2    | 0.144 |
| 87  | SEC24D   | 0.003 | SRPRB      | <0.001 | SEL1L    | <0.001 | SENP7    | 0.007 | CAV1     | 0.144 |
| 88  | RPN2     | 0.003 | DNAJB11    | <0.001 | SLC7A5   | <0.001 | IL4R     | 0.007 | PLCB2    | 0.144 |
| 89  | CNKS1R   | 0.003 | B4GALT1    | <0.001 | MALT1    | <0.001 | KIAA1033 | 0.007 | NANP     | 0.144 |
| 90  | IGLL5    | 0.003 | HSPA13     | <0.001 | LMAN1    | <0.001 | PLEKHJ1  | 0.007 | ITM2C    | 0.144 |
| 91  | ACOXL    | 0.003 | SEC61B     | <0.001 | EDEM2    | <0.001 | TLR7     | 0.007 | RWDD3    | 0.144 |
| 92  | DDX1     | 0.003 | HSPA5      | <0.001 | RPN2     | <0.001 | MOBK1A   | 0.007 | EEF2K    | 0.145 |
| 93  | SEC23B   | 0.003 | SRP54      | <0.001 | ARMCX3   | <0.001 | ZDHC17   | 0.007 | MOXD1    | 0.145 |
| 94  | FBXW7    | 0.003 | PYCR1      | <0.001 | EDEM3    | <0.001 | SIKE1    | 0.007 | CDA7     | 0.145 |
| 95  | SPARC    | 0.003 | SSR2       | <0.001 | SRPR     | <0.001 | CAV1     | 0.007 | ZNF180   | 0.145 |
| 96  | SCFD1    | 0.003 | SEC14L1    | <0.001 | MEI1     | <0.001 | SLC35F5  | 0.007 | MACROD2  | 0.145 |
| 97  | FAM171A1 | 0.003 | ERP44      | <0.001 | DDOST    | <0.001 | BCLAF1   | 0.007 | SLC4A8   | 0.145 |
| 98  | NOTCH1   | 0.003 | KIAA0114   | <0.001 | PCCB     | <0.001 | HDAC5    | 0.007 | BTAF1    | 0.146 |
| 99  | IFI27L1  | 0.003 | DERL1      | <0.001 | HAX1     | <0.001 | TTL12    | 0.007 | ATPIF1   | 0.146 |
| 100 | FAM55C   | 0.003 | FBXO18     | <0.001 | TMCO1    | <0.001 | C11orf2  | 0.008 | STAM     | 0.146 |
| 101 | MNT      | 0.003 | EDEM1      | <0.001 | COPG     | <0.001 | PTOV1    | 0.008 | LRRN2    | 0.146 |
| 102 | C17orf28 | 0.003 | SUB1       | <0.001 | NT5E     | <0.001 | ZBTB22   | 0.008 | RPL7A    | 0.146 |
| 103 | PRDX4    | 0.003 | SAR1B      | <0.001 | MOXD1    | <0.001 | PLD4     | 0.008 | ATP11A   | 0.146 |
| 104 | OSTC     | 0.003 | ABCB9      | <0.001 | GLCC11   | <0.001 | NCBP2    | 0.008 | FAM98A   | 0.151 |
| 105 | NFATC3   | 0.003 | C14orf145  | <0.001 | DNAJC1   | <0.001 | FAM35A   | 0.008 | SRSF5    | 0.151 |
| 106 | ITM2C    | 0.004 | STT3B      | <0.001 | VKORC1   | <0.001 | KCNG1    | 0.008 | POLR1A   | 0.151 |
| 107 | SPI1     | 0.004 | ST6GALNAC4 | <0.001 | B9D1     | <0.001 | AGFG1    | 0.008 | PSMB5    | 0.151 |
| 108 | HSPA13   | 0.004 | ISG20      | <0.001 | ERGIC3   | <0.001 | C12orf57 | 0.008 | TRPM2    | 0.153 |
| 109 | UNC13B   | 0.004 | DCPS       | 0.001  | MAPK1    | <0.001 | PIK3C2A  | 0.008 | PAICS    | 0.153 |
| 110 | PATZ1    | 0.004 | IGJ        | 0.001  | ITM2A    | <0.001 | IGHM     | 0.008 | TNFRSF17 | 0.156 |
| 111 | VEGFA    | 0.004 | BMP6       | 0.001  | ABCC4    | <0.001 | C9orf16  | 0.008 | FLVCR1   | 0.158 |
| 112 | REXO2    | 0.004 | CALU       | 0.001  | DNAJC3   | <0.001 | KRBA1    | 0.008 | SYNJ2BP  | 0.158 |
| 113 | NUMA1    | 0.004 | SEC13      | 0.001  | SEC11C   | <0.001 | CRELD1   | 0.008 | RPL38    | 0.160 |
| 114 | SPATS2   | 0.004 | MAN2A1     | 0.001  | ARFGAP3  | <0.001 | KLHDC10  | 0.008 | MARCKS   | 0.160 |
| 115 | DERL2    | 0.004 | SF3B5      | 0.001  | RGS16    | <0.001 | PRPF40A  | 0.008 | BMP8B    | 0.160 |
| 116 | ALDH18A1 | 0.004 | SND1       | 0.001  | SDC1     | <0.001 | COMTD1   | 0.008 | ENTPD4   | 0.162 |
| 117 | KCNN3    | 0.004 | IFI27L1    | 0.001  | TMEM214  | <0.001 | INO80D   | 0.008 | ABHD2    | 0.163 |
| 118 | TMED2    | 0.004 | GMPPB      | 0.001  | PDIA5    | <0.001 | CENPB    | 0.008 | MYO1F    | 0.163 |
| 119 | SUB1     | 0.004 | NEU1       | 0.001  | RNF122   | <0.001 | C19orf24 | 0.008 | MFSD8    | 0.165 |
| 120 | TMEM198  | 0.004 | TMED2      | 0.001  | FKBP2    | <0.001 | CYB5R3   | 0.008 | NCAPH    | 0.165 |
| 121 | IGKC     | 0.004 | APOL1      | 0.001  | ACAD8    | <0.001 | RAB7L1   | 0.008 | RPS29    | 0.165 |
| 122 | LOC96610 | 0.004 | SLC33A1    | 0.001  | FKBP11   | <0.001 | ALDOA    | 0.008 | ITGB1    | 0.165 |
| 123 | SELS     | 0.004 | RBM47      | 0.001  | SLC39A9  | <0.001 | RALGPS2  | 0.008 | TBRG1    | 0.165 |
| 124 | MAGT1    | 0.004 | ROMO1      | 0.001  | DERL2    | <0.001 | FOXP4    | 0.008 | POLE     | 0.165 |
| 125 | SEC22B   | 0.004 | HYOU1      | 0.001  | KLHL14   | <0.001 | EDEM3    | 0.008 | ZNF132   | 0.165 |
| 126 | PRDM1    | 0.004 | MAGED1     | 0.001  | MAGED1   | <0.001 | SCYL1    | 0.008 | IGHG3    | 0.165 |
| 127 | FKBP11   | 0.004 | CLPTM1L    | 0.001  | ETS1     | <0.001 | RABAC1   | 0.008 | TXNDC5   | 0.165 |
| 128 | STK10    | 0.004 | DNAJC3     | 0.001  | MFF      | <0.001 | RNF126   | 0.008 | MRE11A   | 0.165 |
| 129 | HSP90B1  | 0.004 | OST4       | 0.001  | MARS     | <0.001 | IMPAD1   | 0.008 | TRIM46   | 0.165 |
| 130 | JAZF1    | 0.004 | 41527.000  | 0.001  | KDM2B    | <0.001 | CNOT6L   | 0.008 | GIMAP7   | 0.165 |
| 131 | MYO1D    | 0.004 | GLDC       | 0.001  | GF11     | <0.001 | SHKBP1   | 0.008 | CCR1     | 0.169 |
| 132 | GYG1     | 0.004 | OSTC       | 0.001  | ERAP1    | <0.001 | NAA38    | 0.008 | C13orf23 | 0.171 |
| 133 | LTB      | 0.004 | TRIB1      | 0.001  | VEGFA    | <0.001 | POLR2I   | 0.008 | PLEKHF2  | 0.171 |
| 134 | MBNL2    | 0.004 | NDUFA4     | 0.001  | CTSD     | <0.001 | ARHGDI1A | 0.008 | FLJ90757 | 0.173 |
| 135 | RPS27L   | 0.004 | SELL       | 0.001  | OS9      | <0.001 | HLA-C    | 0.008 | RAP1GAP2 | 0.174 |
| 136 | SCAMP5   | 0.004 | GANAB      | 0.001  | C19orf10 | <0.001 | PJA2     | 0.008 | ZNF234   | 0.174 |
| 137 | FBXW4    | 0.004 | ACAT1      | 0.001  | PRKCSH   | <0.001 | NUCB1    | 0.009 | TAF7     | 0.174 |
| 138 | INPP4A   | 0.004 | CALR       | 0.001  | NUCB1    | <0.001 | PDLIM2   | 0.009 | CCDC61   | 0.174 |
| 139 | IGHM     | 0.004 | CXCR3      | 0.001  | SSR2     | <0.001 | CCDC50   | 0.009 | HBXIP    | 0.174 |
| 140 | NOMO2    | 0.004 | KDELR2     | 0.001  | KDELR2   | <0.001 | COBRA1   | 0.009 | JHDM1D   | 0.174 |

|     |            |       |           |       |            |        |           |       |           |       |
|-----|------------|-------|-----------|-------|------------|--------|-----------|-------|-----------|-------|
| 141 | BRPF1      | 0.004 | PDIA6     | 0.001 | JAK1       | <0.001 | C10orf118 | 0.009 | DIP2A     | 0.174 |
| 142 | KCNK6      | 0.004 | LIME1     | 0.001 | PIGT       | <0.001 | IGHD      | 0.009 | FAM46C    | 0.174 |
| 143 | HERPUD1    | 0.004 | COPA      | 0.001 | ST6GALNAC4 | <0.001 | XAB2      | 0.009 | PLA2G12A  | 0.174 |
| 144 | CITED2     | 0.004 | DNAJC1    | 0.001 | SPC51      | <0.001 | LTBP3     | 0.009 | NOP16     | 0.178 |
| 145 | TMEM59     | 0.004 | XAF1      | 0.001 | ITGB7      | <0.001 | SF3A2     | 0.009 | UCLH1     | 0.178 |
| 146 | DNASE2     | 0.004 | SEC24D    | 0.001 | TM9SF2     | <0.001 | RCCD1     | 0.009 | CRL51     | 0.181 |
| 147 | LMAN1      | 0.004 | TMEM59    | 0.001 | CNP        | 0.001  | FOXN2     | 0.009 | RPN2      | 0.183 |
| 148 | IBTK       | 0.004 | COPG      | 0.001 | SLC1A4     | 0.001  | ZNF664    | 0.009 | IFIT5     | 0.183 |
| 149 | CCR7       | 0.004 | IGHM      | 0.001 | SPATS2     | 0.001  | LTB       | 0.009 | ATP6V0E1  | 0.183 |
| 150 | HCST       | 0.004 | C1GALT1C1 | 0.001 | HDAC1      | 0.001  | HLA-H     | 0.009 | RNFT1     | 0.183 |
| 151 | PPP1R9B    | 0.004 | FAM82A1   | 0.001 | GORASP2    | 0.001  | ZFYVE16   | 0.009 | ACAD11    | 0.183 |
| 152 | B4GALT3    | 0.004 | RAP1GDS1  | 0.001 | C2orf88    | 0.001  | MICALL1   | 0.009 | RAB3IP    | 0.186 |
| 153 | C1GALT1C1  | 0.004 | ITFG1     | 0.001 | ARF4       | 0.001  | YTHDC2    | 0.009 | SLC25A30  | 0.186 |
| 154 | GMPPA      | 0.004 | OS9       | 0.001 | SERP1      | 0.001  | C14orf135 | 0.009 | ABCA2     | 0.186 |
| 155 | SDC1       | 0.004 | CHCHD2    | 0.001 | TARS       | 0.001  | CTDSP1    | 0.009 | GRIN3A    | 0.186 |
| 156 | TRAM2      | 0.004 | SELS      | 0.001 | TBXAS1     | 0.001  | ZDHHHC12  | 0.009 | CASP10    | 0.186 |
| 157 | AXIN1      | 0.004 | PIK3C2B   | 0.001 | DERL1      | 0.001  | SLTM      | 0.009 | RRAGD     | 0.186 |
| 158 | FBM47      | 0.004 | UCLH1     | 0.001 | C13orf18   | 0.001  | CHD1      | 0.009 | PTMS      | 0.186 |
| 159 | FRAT1      | 0.004 | SDF2L1    | 0.001 | PHKA2      | 0.001  | C9orf142  | 0.010 | C22orf34  | 0.189 |
| 160 | UBE2J1     | 0.004 | GORASP2   | 0.001 | PREB       | 0.001  | U2SURP    | 0.010 | C19orf10  | 0.191 |
| 161 | TSG101     | 0.004 | RRP7B     | 0.001 | SLC33A1    | 0.001  | ATR       | 0.010 | NTSDC2    | 0.191 |
| 162 | NFATC1     | 0.004 | DUSP5     | 0.001 | MCC        | 0.001  | SSBP4     | 0.010 | OCIAD2    | 0.191 |
| 163 | TARS       | 0.004 | AMPD3     | 0.001 | MAN1B1     | 0.001  | SLC35A5   | 0.010 | BZRAP1    | 0.191 |
| 164 | SLC7A5     | 0.004 | ATP5A1    | 0.001 | HERPUD1    | 0.001  | SF3B5     | 0.010 | TCTEX1D2  | 0.191 |
| 165 | HDLBP      | 0.004 | UBA5      | 0.001 | SLC38A10   | 0.001  | MAP1S     | 0.010 | ADAT2     | 0.191 |
| 166 | CECR1      | 0.004 | KCNN3     | 0.001 | SLC1A5     | 0.001  | TSTD1     | 0.010 | TRIO      | 0.191 |
| 167 | XBP1       | 0.004 | SSR3      | 0.001 | ERGIC2     | 0.001  | BLK       | 0.010 | NCF1C     | 0.191 |
| 168 | SRP54      | 0.004 | UQCRQ     | 0.001 | CKAP4      | 0.001  | CD38      | 0.010 | PTPRF     | 0.191 |
| 169 | TPD52      | 0.004 | ITGB7     | 0.001 | FICD       | 0.001  | ATP13A3   | 0.010 | SLC38A5   | 0.191 |
| 170 | ERAP1      | 0.004 | SLC39A7   | 0.001 | LASS6      | 0.001  | LMAN2     | 0.010 | SDC1      | 0.191 |
| 171 | APOL1      | 0.004 | LAX1      | 0.001 | PDIA4      | 0.001  | MS4A1     | 0.010 | ZNF154    | 0.191 |
| 172 | NTSDC2     | 0.004 | ZBP1      | 0.001 | B2M        | 0.001  | NFATC1    | 0.010 | COMMD6    | 0.191 |
| 173 | ST6GALNAC4 | 0.004 | CLN6      | 0.001 | WARS       | 0.001  | CCDC82    | 0.010 | MIAT      | 0.191 |
| 174 | GLRX       | 0.004 | PIM2      | 0.001 | PDXK       | 0.001  | CYBA      | 0.010 | PQBP1     | 0.191 |
| 175 | DNAJC1     | 0.004 | PRDX5     | 0.001 | PAM        | 0.001  | MED25     | 0.010 | SEC14L1   | 0.191 |
| 176 | PACS1      | 0.004 | LRPAP1    | 0.001 | USO1       | 0.001  | SLC39A3   | 0.010 | RNF125    | 0.191 |
| 177 | DENND5B    | 0.004 | WIP1      | 0.001 | ST7        | 0.001  | SNX17     | 0.010 | NTAN1     | 0.191 |
| 178 | LARS       | 0.004 | DAD1      | 0.002 | C8orf80    | 0.001  | EHD1      | 0.010 | TMEM184B  | 0.191 |
| 179 | SEC11C     | 0.004 | USO1      | 0.002 | ACO2       | 0.001  | CORO1A    | 0.010 | ANAPC16   | 0.191 |
| 180 | NOMO1      | 0.004 | COX7A2    | 0.002 | SLC38A5    | 0.001  | NCF1C     | 0.010 | NBPF9     | 0.191 |
| 181 | BRD1       | 0.004 | C17orf28  | 0.002 | GALNT2     | 0.001  | ARPC1B    | 0.010 | LRPAP1    | 0.191 |
| 182 | ZC3H12A    | 0.004 | UAP1      | 0.002 | SLC39A14   | 0.001  | ANKRD13D  | 0.010 | RPRD1A    | 0.191 |
| 183 | ZNF862     | 0.004 | SUMF2     | 0.002 | FBXO18     | 0.001  | DENND4A   | 0.010 | HIST1H2BK | 0.192 |
| 184 | SLC2A1     | 0.004 | KCNK6     | 0.002 | JSRP1      | 0.001  | UPF2      | 0.010 | YWHAG     | 0.192 |
| 185 | ALDH1L2    | 0.004 | DENND1B   | 0.002 | SLC25A23   | 0.001  | SAMD1     | 0.010 | NDUFB3    | 0.192 |
| 186 | C8orf80    | 0.004 | GMPPA     | 0.002 | ERC1       | 0.001  | SP3       | 0.010 | ATP2A2    | 0.192 |
| 187 | ITFG1      | 0.004 | IGF1      | 0.002 | SLC16A14   | 0.001  | PACS2     | 0.010 | IL6R      | 0.192 |
| 188 | SEC24A     | 0.004 | RSBN1     | 0.002 | PTPN12     | 0.001  | C1orf86   | 0.010 | SLFN11    | 0.192 |
| 189 | CALU       | 0.004 | HAX1      | 0.002 | B4GALT3    | 0.001  | FBXW5     | 0.010 | SDK2      | 0.192 |
| 190 | SIPA1      | 0.004 | RCBTB2    | 0.002 | LAP3       | 0.001  | KIAA1370  | 0.010 | NUCB2     | 0.192 |
| 191 | EPRS       | 0.004 | AKR1B1    | 0.002 | SLC30A7    | 0.001  | CNKSR2    | 0.010 | ABAT      | 0.192 |
| 192 | PKN1       | 0.004 | MYO1D     | 0.002 | ADARB1     | 0.001  | RPH3AL    | 0.010 | RHPN2     | 0.193 |
| 193 | TMCO1      | 0.004 | TMEM184B  | 0.002 | ARCN1      | 0.001  | SLC36A4   | 0.010 | ZNF34     | 0.193 |
| 194 | AKNA       | 0.004 | SRM       | 0.002 | C1orf43    | 0.001  | PCM1      | 0.010 | SLAMF7    | 0.193 |
| 195 | 41519.000  | 0.004 | DERL2     | 0.002 | ATXN1      | 0.001  | MBD3      | 0.010 | C14orf49  | 0.193 |
| 196 | CCNC       | 0.004 | MANF      | 0.002 | CNKSR1     | 0.001  | NENF      | 0.010 | DNMT3B    | 0.193 |
| 197 | OS9        | 0.004 | MAGEH1    | 0.002 | TXNDC11    | 0.001  | MTA1      | 0.010 | PSTPIP2   | 0.193 |
| 198 | FBF1       | 0.005 | ATP8B2    | 0.002 | YIPF5      | 0.001  | DEAF1     | 0.010 | AHSA2     | 0.193 |
| 199 | SLC44A1    | 0.005 | C14orf2   | 0.002 | QPCTL      | 0.001  | P4HTM     | 0.010 | LOC144438 | 0.193 |
| 200 | ATXN1      | 0.005 | PRDX2     | 0.002 | MAN1A1     | 0.001  | ZNF148    | 0.010 | C11orf10  | 0.193 |
| 201 | CREB3L2    | 0.005 | BIK       | 0.002 | UAP1       | 0.001  | CDC27     | 0.010 | RPL36AL   | 0.193 |
| 202 | B4GALT2    | 0.005 | ERAP1     | 0.002 | FAM69A     | 0.001  | NMI       | 0.010 | FAM154B   | 0.193 |
| 203 | ELL2       | 0.005 | COPB2     | 0.002 | MGAT2      | 0.001  | ETHE1     | 0.010 | EP400     | 0.193 |
| 204 | CYTIP      | 0.005 | B4GALT2   | 0.002 | RAB37      | 0.001  | XBP1      | 0.010 | HIST1H1C  | 0.193 |
| 205 | MAPK1      | 0.005 | SELT      | 0.002 | 41524.000  | 0.001  | CD46      | 0.011 | SUPV3L1   | 0.193 |
| 206 | GPLD1      | 0.005 | TOR3A     | 0.002 | UGGT2      | 0.001  | DLGAP4    | 0.011 | RPS15A    | 0.193 |
| 207 | SRP72      | 0.005 | MAGT1     | 0.002 | SSR3       | 0.001  | FKBP8     | 0.011 | WDR19     | 0.193 |
| 208 | PHKA1      | 0.005 | HIST1H1C  | 0.002 | UBE2J1     | 0.001  | TRADD     | 0.011 | C14orf166 | 0.193 |
| 209 | SIN3B      | 0.005 | IFI44L    | 0.003 | YWHAG      | 0.001  | TRIM28    | 0.011 | SPATA13   | 0.193 |
| 210 | ALG5       | 0.005 | ZNF250    | 0.003 | RCN1       | 0.001  | NEMF      | 0.011 | MYADM     | 0.193 |
| 211 | SPCS2      | 0.005 | PABPC4    | 0.003 | XBP1       | 0.001  | RALY      | 0.011 | USP36     | 0.193 |
| 212 | BTBD2      | 0.005 | SLC38A10  | 0.003 | ATF4       | 0.001  | PARP9     | 0.011 | ATP6V1H   | 0.193 |
| 213 | OAT        | 0.005 | CECR1     | 0.003 | SERPINB9   | 0.001  | FNDC3A    | 0.011 | SLC25A23  | 0.193 |
| 214 | SLC44A2    | 0.005 | C4orf52   | 0.003 | SEC24D     | 0.001  | MPG       | 0.011 | GPRASP1   | 0.193 |
| 215 | DBNL       | 0.005 | CD59      | 0.003 | SCN3A      | 0.001  | PIGQ      | 0.011 | FUT8      | 0.193 |
| 216 | ATOX1      | 0.005 | YIPF1     | 0.003 | CCR2       | 0.001  | PTGES2    | 0.011 | AMOT      | 0.193 |
| 217 | RNASE6     | 0.005 | CANX      | 0.003 | SRPRB      | 0.001  | CYC1      | 0.011 | MYO1B     | 0.193 |
| 218 | RRBP1      | 0.005 | SERF2     | 0.003 | LMAN2      | 0.001  | RLTPR     | 0.011 | SSR4      | 0.193 |



|     |          |       |          |       |          |       |           |       |           |       |
|-----|----------|-------|----------|-------|----------|-------|-----------|-------|-----------|-------|
| 219 | SCARB2   | 0.005 | COX7B    | 0.003 | FIG4     | 0.001 | DRAP1     | 0.011 | DCST2     | 0.194 |
| 220 | CCT8     | 0.005 | VAV3     | 0.003 | SIPA1L1  | 0.001 | RBM41     | 0.011 | LOC645638 | 0.194 |
| 221 | SPCS1    | 0.005 | CREB3    | 0.003 | ATRN     | 0.001 | CTDSP2    | 0.011 | KIAA1530  | 0.194 |
| 222 | SPPL2B   | 0.005 | ALDH1L2  | 0.003 | SP110    | 0.001 | CDK2AP2   | 0.011 | AOAH      | 0.194 |
| 223 | IDE      | 0.005 | GAPT     | 0.003 | SRP72    | 0.001 | C8orf37   | 0.011 | GBP2      | 0.194 |
| 224 | LSM14B   | 0.005 | ABLIM1   | 0.003 | CREB3    | 0.001 | TAGLN2    | 0.011 | ZNF35     | 0.194 |
| 225 | DNAJB9   | 0.005 | RAB12    | 0.003 | MOGS     | 0.001 | NUCB2     | 0.011 | RPL30     | 0.194 |
| 226 | PLEKHA2  | 0.005 | SLC35B1  | 0.003 | TMED5    | 0.001 | SOCS4     | 0.011 | WDHD1     | 0.194 |
| 227 | IGHD     | 0.005 | MGLL     | 0.003 | MAN2B1   | 0.001 | FOXK2     | 0.011 | SLC16A1   | 0.194 |
| 228 | NDUFA4   | 0.005 | CHD3     | 0.003 | CD38     | 0.001 | RBM26     | 0.011 | ZNF605    | 0.194 |
| 229 | SRP68    | 0.005 | C11orf10 | 0.003 | OGDH     | 0.001 | C19orf60  | 0.011 | CLDND1    | 0.194 |
| 230 | DGKD     | 0.005 | ATP5J    | 0.003 | RPN1     | 0.001 | YIF1A     | 0.011 | CYB561    | 0.194 |
| 231 | GALNT2   | 0.005 | BRP44L   | 0.003 | LAMC1    | 0.001 | RNF6      | 0.011 | NUP155    | 0.194 |
| 232 | ARMCX3   | 0.005 | CASP10   | 0.003 | PLOD3    | 0.001 | TMTC3     | 0.011 | SLC38A11  | 0.194 |
| 233 | SRGN     | 0.005 | ATP5I    | 0.003 | GPRC5D   | 0.001 | MMP17     | 0.011 | SLC7A1    | 0.194 |
| 234 | CLEC17A  | 0.005 | PEBP1    | 0.003 | PRKX     | 0.001 | STT3B     | 0.011 | WDFY2     | 0.194 |
| 235 | FAM174A  | 0.005 | YIF1B    | 0.003 | LANCL1   | 0.001 | SPATS2    | 0.011 | WRB       | 0.194 |
| 236 | MRPS33   | 0.005 | ARF4     | 0.003 | ATP13A1  | 0.001 | SLAMF7    | 0.011 | KIF14     | 0.194 |
| 237 | BIRC3    | 0.005 | ATP2A2   | 0.003 | TMED10   | 0.001 | LARS      | 0.012 | CCDC53    | 0.194 |
| 238 | SERP1    | 0.005 | IDE      | 0.003 | UBTF     | 0.001 | CHMP1A    | 0.012 | SLX4      | 0.194 |
| 239 | GLDC     | 0.005 | PDK1     | 0.003 | PLD3     | 0.001 | ANKRD12   | 0.012 | GALNT2    | 0.195 |
| 240 | SIL1     | 0.005 | KDEL1    | 0.003 | GOSR2    | 0.001 | USP33     | 0.012 | C18orf18  | 0.196 |
| 241 | SLC39A14 | 0.005 | WNT5B    | 0.003 | KRTCAP2  | 0.001 | JAK2      | 0.012 | DHX33     | 0.198 |
| 242 | GOLPH3L  | 0.005 | SEC23B   | 0.003 | ATXN7L3B | 0.001 | SEL1L     | 0.012 | SPN       | 0.198 |
| 243 | VCL      | 0.005 | GCF1     | 0.003 | FOXO1    | 0.001 | CCAR1     | 0.012 | C1orf55   | 0.198 |
| 244 | ZBP1     | 0.005 | SLC16A14 | 0.003 | KIF19    | 0.001 | ZBTB38    | 0.012 | GDF11     | 0.198 |
| 245 | PERP     | 0.005 | MGAT1    | 0.003 | PLOD1    | 0.001 | CNN2      | 0.012 | RALGPS1   | 0.198 |
| 246 | PMM2     | 0.005 | B2M      | 0.003 | RABAC1   | 0.001 | PRCC      | 0.012 | TMTC3     | 0.199 |
| 247 | SEC61A1  | 0.005 | NUDT2    | 0.003 | ITCH     | 0.001 | TOP2B     | 0.012 | TCTN1     | 0.199 |
| 248 | STT3A    | 0.005 | ADIPOR1  | 0.003 | SRM      | 0.001 | MRPL28    | 0.012 | SELPLG    | 0.202 |
| 249 | DNAJC3   | 0.005 | PERP     | 0.003 | SLC39A7  | 0.001 | RBM42     | 0.012 | TCEA1     | 0.202 |
| 250 | GPX7     | 0.005 | FAM102B  | 0.003 | CHST12   | 0.001 | USP16     | 0.012 | HSD17B7P2 | 0.203 |
| 251 | EZR      | 0.005 | SNRPG    | 0.003 | PIIB     | 0.001 | ZNF655    | 0.012 | TGFB2     | 0.203 |
| 252 | MAST3    | 0.005 | QPCTL    | 0.003 | AGA      | 0.001 | LIMD2     | 0.012 | EAF2      | 0.203 |
| 253 | CD37     | 0.005 | SCARB2   | 0.003 | DCAF12   | 0.001 | TXNRD1    | 0.012 | NOMO3     | 0.204 |
| 254 | NDFIP2   | 0.005 | ERC1     | 0.003 | RAP2A    | 0.001 | ZNF638    | 0.012 | GPR160    | 0.204 |
| 255 | PHF15    | 0.005 | SLC1A4   | 0.003 | TBC1D7   | 0.001 | TLR6      | 0.012 | PCK2      | 0.204 |
| 256 | PHF12    | 0.005 | MRPL22   | 0.003 | BCL2     | 0.001 | EPN1      | 0.012 | ZNF445    | 0.206 |
| 257 | KMO      | 0.005 | TMEM165  | 0.003 | PARM1    | 0.001 | STOML1    | 0.012 | TBC1D8    | 0.206 |
| 258 | GLCC1    | 0.005 | MCC      | 0.003 | VDR      | 0.001 | EML4      | 0.012 | MCM9      | 0.206 |
| 259 | PIGT     | 0.005 | EIF2S1   | 0.003 | TMEM184B | 0.001 | HCG4      | 0.012 | SLC35B1   | 0.209 |
| 260 | QPCTL    | 0.005 | SCAMP5   | 0.003 | MLL5     | 0.001 | UBE2A     | 0.012 | PHACTR1   | 0.209 |
| 261 | PYCR1    | 0.005 | CENPM    | 0.003 | B4GALT1  | 0.001 | IGFLR1    | 0.012 | BTF3      | 0.210 |
| 262 | EDEM2    | 0.005 | PSMA5    | 0.003 | EIF2AK3  | 0.001 | TYSND1    | 0.012 | AARS      | 0.210 |
| 263 | SEC14L1  | 0.005 | ZNF638   | 0.004 | SPARC    | 0.001 | DBT       | 0.012 | PDK1      | 0.210 |
| 264 | MAN1A1   | 0.005 | CNKSR1   | 0.004 | SKAP1    | 0.001 | WDR83     | 0.012 | MZB1      | 0.211 |
| 265 | DDOST    | 0.005 | YWHAE    | 0.004 | STT3A    | 0.001 | ACTN4     | 0.012 | GNAS      | 0.212 |
| 266 | TBC1D10C | 0.005 | MLEC     | 0.004 | IMPAD1   | 0.001 | MRPL12    | 0.012 | ZNF587    | 0.212 |
| 267 | COPB2    | 0.005 | ESR1     | 0.004 | ISG20    | 0.001 | HSPA13    | 0.012 | CKAP4     | 0.213 |
| 268 | FMNL3    | 0.005 | SERP1    | 0.004 | GARS     | 0.001 | GLDC      | 0.012 | THOC2     | 0.213 |
| 269 | EAF2     | 0.005 | GLG1     | 0.004 | UNC13B   | 0.001 | DNM2      | 0.012 | RAD51     | 0.214 |
| 270 | ATP8B2   | 0.005 | PIK3CD   | 0.004 | C13orf15 | 0.001 | C14orf181 | 0.012 | SSR2      | 0.214 |
| 271 | TMEM80   | 0.005 | COPE     | 0.004 | SRP54    | 0.001 | SACS      | 0.012 | FOSL2     | 0.214 |
| 272 | TXNDC11  | 0.005 | NUCB1    | 0.004 | ARID4A   | 0.001 | LY6E      | 0.012 | ABHD5     | 0.214 |
| 273 | SSR2     | 0.005 | CDR2     | 0.004 | AARS     | 0.001 | UCP2      | 0.012 | GOLGA1    | 0.214 |
| 274 | NELF     | 0.005 | TM9SF2   | 0.004 | GFPT1    | 0.001 | ALKBH7    | 0.012 | FOXN2     | 0.214 |
| 275 | CHID1    | 0.006 | MALT1    | 0.004 | ATP6AP1  | 0.001 | TSEN54    | 0.012 | GABARAP   | 0.214 |
| 276 | UCK2     | 0.006 | EHD3     | 0.004 | HLA-DMB  | 0.001 | CHCHD10   | 0.013 | PLCG1     | 0.214 |
| 277 | BCL2L11  | 0.006 | ARNT     | 0.004 | TRAM1    | 0.001 | TMOD2     | 0.013 | IREB2     | 0.214 |
| 278 | FBXO18   | 0.006 | FAM69A   | 0.004 | PRDX5    | 0.001 | DYRK1B    | 0.013 | NOL9      | 0.214 |
| 279 | STT3B    | 0.006 | IFNAR2   | 0.004 | MPST     | 0.001 | NCOR2     | 0.013 | RAVER2    | 0.214 |
| 280 | DPAGT1   | 0.006 | MET      | 0.004 | CDR2     | 0.001 | SPINT2    | 0.013 | UTP20     | 0.214 |
| 281 | IDH2     | 0.006 | PHF11    | 0.004 | DNAJC7   | 0.001 | CSK       | 0.013 | HSP90B1   | 0.216 |
| 282 | MTRR     | 0.006 | BCL2L11  | 0.004 | CYFIP2   | 0.001 | 41526.000 | 0.013 | TNFAIP2   | 0.216 |
| 283 | EVL      | 0.006 | CHAC2    | 0.004 | SLC44A1  | 0.001 | ISYNA1    | 0.013 | ZEB2      | 0.216 |
| 284 | KIAA0114 | 0.006 | SURF4    | 0.004 | PDE1B    | 0.001 | TMEM222   | 0.013 | SEMA4G    | 0.216 |
| 285 | SCAF4    | 0.006 | TET3     | 0.004 | GNL3     | 0.001 | RC3H1     | 0.013 | MYB       | 0.216 |
| 286 | CYB561D1 | 0.006 | TP53I11  | 0.005 | FAM171A1 | 0.001 | ARL6IP4   | 0.013 | GALNT11   | 0.216 |
| 287 | SLA      | 0.006 | METTL7A  | 0.005 | TMEM208  | 0.001 | TCF3      | 0.013 | GABPB1    | 0.216 |
| 288 | RUNX2    | 0.006 | TMEM147  | 0.005 | MTSS1    | 0.001 | HCFC1R1   | 0.013 | IGJ       | 0.216 |
| 289 | CISD2    | 0.006 | C10orf76 | 0.005 | NDRG3    | 0.001 | BRWD3     | 0.013 | ITGA6     | 0.216 |
| 290 | ATP6AP1  | 0.006 | TM9SF1   | 0.005 | GMPPA    | 0.001 | CALM3     | 0.013 | PRKAB2    | 0.216 |
| 291 | ZNF783   | 0.006 | ME2      | 0.005 | SPCS3    | 0.001 | FCGRT     | 0.013 | TWSG1     | 0.218 |
| 292 | ATG13    | 0.006 | ZCCHC2   | 0.005 | TAF7     | 0.001 | GOLGA4    | 0.013 | KDEL1     | 0.218 |
| 293 | FKBP15   | 0.006 | RABAC1   | 0.005 | SMAD3    | 0.001 | LAP3      | 0.013 | APOL1     | 0.219 |
| 294 | TMED10   | 0.006 | ARF1     | 0.005 | GMPPB    | 0.001 | PIK3R2    | 0.013 | TNRC6A    | 0.219 |
| 295 | KIAA0753 | 0.006 | GPR172A  | 0.005 | FAM8A1   | 0.001 | IDH3B     | 0.013 | NEK7      | 0.219 |
| 296 | IFI27L2  | 0.006 | ATG13    | 0.005 | SEC61A1  | 0.001 | DDX60L    | 0.013 | PDIA4     | 0.220 |

|     |           |       |           |       |           |       |            |       |           |       |
|-----|-----------|-------|-----------|-------|-----------|-------|------------|-------|-----------|-------|
| 297 | DAD1      | 0.006 | ATG12     | 0.005 | SEC23B    | 0.001 | PKN1       | 0.013 | C2orf28   | 0.220 |
| 298 | PLD3      | 0.006 | NDUFS3    | 0.005 | MANF      | 0.001 | CLN3       | 0.013 | DYNC2L1   | 0.220 |
| 299 | NRD1      | 0.006 | CCDC69    | 0.005 | GUSB      | 0.001 | SEC11C     | 0.013 | GLYCK     | 0.220 |
| 300 | GF1       | 0.006 | LRRC59    | 0.005 | GOLGA2    | 0.001 | GPAA1      | 0.013 | PALLD     | 0.220 |
| 301 | ANKRD28   | 0.006 | C6orf129  | 0.005 | CRELD2    | 0.001 | TFEB       | 0.013 | MRPS33    | 0.220 |
| 302 | PPIB      | 0.006 | ACYP1     | 0.005 | PHLPP2    | 0.001 | RPAP3      | 0.013 | TIGIT     | 0.220 |
| 303 | IRF2BPL   | 0.006 | CD320     | 0.005 | LAX1      | 0.001 | CAPN10     | 0.013 | SLC43A3   | 0.220 |
| 304 | SEC63     | 0.006 | FMNL3     | 0.005 | ZNF107    | 0.001 | BIN1       | 0.013 | TRIM47    | 0.220 |
| 305 | NUS1      | 0.006 | NDUFB9    | 0.005 | IFI27L1   | 0.001 | C19orf22   | 0.013 | REXO2     | 0.220 |
| 306 | ZBTB38    | 0.006 | GPAA1     | 0.005 | NIN       | 0.001 | UBE2J2     | 0.013 | LMO7      | 0.220 |
| 307 | ITM2A     | 0.006 | EML4      | 0.005 | GPT2      | 0.001 | CLIP2      | 0.013 | PBLD      | 0.222 |
| 308 | GFPT1     | 0.006 | MTDH      | 0.005 | REC8      | 0.001 | USP15      | 0.013 | YIF1B     | 0.223 |
| 309 | CNP       | 0.006 | NXF1      | 0.005 | CD22      | 0.001 | TGFB1      | 0.013 | PDIA5     | 0.223 |
| 310 | CD40      | 0.006 | COX5A     | 0.005 | PAN3      | 0.001 | CCDC137    | 0.013 | WDR60     | 0.223 |
| 311 | KRI1      | 0.006 | DDB1      | 0.005 | COPA      | 0.001 | ANKMY1     | 0.013 | ITM2A     | 0.223 |
| 312 | FAM46C    | 0.006 | YKT6      | 0.005 | RAB1A     | 0.001 | VPS13A     | 0.013 | DNM1L     | 0.223 |
| 313 | SYNGAP1   | 0.006 | SLC31A1   | 0.005 | FBNP1     | 0.001 | RPN2       | 0.013 | PGM3      | 0.223 |
| 314 | KCTD3     | 0.006 | VCP       | 0.005 | NDFIP2    | 0.001 | WDR34      | 0.013 | TMED9     | 0.223 |
| 315 | SEC61G    | 0.006 | ARFGAP3   | 0.005 | SETD7     | 0.001 | PRKAB2     | 0.013 | GPANK1    | 0.223 |
| 316 | ZNF260    | 0.006 | TMED3     | 0.005 | CHST15    | 0.001 | MYO1G      | 0.013 | KCNH8     | 0.223 |
| 317 | RIN3      | 0.006 | DENND5B   | 0.005 | HSP90B1   | 0.001 | C21orf2    | 0.013 | ERLEC1    | 0.223 |
| 318 | WDR77     | 0.006 | HDAC1     | 0.005 | RGS13     | 0.001 | EPHB6      | 0.013 | SLC16A14  | 0.223 |
| 319 | CDR2      | 0.006 | OGG1      | 0.005 | RPS23     | 0.001 | TMX3       | 0.013 | RPL22L1   | 0.223 |
| 320 | NDUFA1    | 0.006 | WDFY4     | 0.005 | P2RY14    | 0.001 | DCXR       | 0.013 | CHMP1B    | 0.224 |
| 321 | HSPA5     | 0.006 | CD72      | 0.005 | APBB1     | 0.001 | PCMTD1     | 0.013 | ZNF358    | 0.224 |
| 322 | C12orf23  | 0.006 | ZNF300    | 0.005 | B4GALT2   | 0.001 | GPS1       | 0.013 | ITPRIP    | 0.224 |
| 323 | QSOX2     | 0.006 | DNASE2    | 0.005 | SLAMF1    | 0.001 | SEC24D     | 0.014 | KLF7      | 0.224 |
| 324 | SEC61B    | 0.006 | TMEM208   | 0.005 | MLEC      | 0.001 | SOLH       | 0.014 | MTRR      | 0.224 |
| 325 | SEMA4A    | 0.006 | SUCLG1    | 0.005 | TMED7     | 0.001 | TRIP12     | 0.014 | GUF1      | 0.224 |
| 326 | CD59      | 0.006 | FBXO33    | 0.005 | SCFD1     | 0.001 | GLCCI1     | 0.014 | PDSS2     | 0.224 |
| 327 | USP48     | 0.006 | CLEC17A   | 0.005 | FAM38A    | 0.001 | ITCH       | 0.014 | ZC3H6     | 0.224 |
| 328 | AARS      | 0.006 | GFPT1     | 0.005 | TXLNA     | 0.001 | ARPP19     | 0.014 | PHLDB2    | 0.224 |
| 329 | HM13      | 0.006 | B9D1      | 0.005 | SELL      | 0.001 | ALDH1L2    | 0.014 | IKZF5     | 0.224 |
| 330 | TST       | 0.006 | DSP       | 0.005 | SH3BP5    | 0.001 | RASSF7     | 0.014 | MAP4K3    | 0.224 |
| 331 | ERGIC3    | 0.006 | CRIP1     | 0.006 | SNRNP48   | 0.001 | MBOAT7     | 0.014 | PML       | 0.224 |
| 332 | IQGAP2    | 0.006 | KRI1      | 0.006 | CLPTM1L   | 0.001 | KNTC1      | 0.014 | PLCD1     | 0.224 |
| 333 | TNFRSF17  | 0.006 | IMPAD1    | 0.006 | IFI6      | 0.001 | POLR2E     | 0.014 | RSL24D1   | 0.224 |
| 334 | IGJ       | 0.006 | C1orf85   | 0.006 | SPOCK2    | 0.001 | WAS        | 0.014 | ALDH1L2   | 0.224 |
| 335 | MRPL51    | 0.006 | NOL8      | 0.006 | LOC643733 | 0.001 | PRMT1      | 0.014 | ZNF773    | 0.224 |
| 336 | ALG8      | 0.006 | FOXP1     | 0.006 | UBA5      | 0.001 | OBFC2A     | 0.014 | EP400NL   | 0.224 |
| 337 | HMHA1     | 0.006 | USMG5     | 0.006 | KDM5B     | 0.001 | ATP2B1     | 0.014 | C9orf21   | 0.224 |
| 338 | ADIPOR1   | 0.006 | UQCRH     | 0.006 | RBM47     | 0.001 | SLC39A14   | 0.015 | ARVCF     | 0.224 |
| 339 | MAPK1IP1L | 0.006 | NUFIP2    | 0.006 | GNAS      | 0.001 | THAP4      | 0.015 | DDX17     | 0.224 |
| 340 | PRRC2A    | 0.006 | ERV3      | 0.006 | IL4R      | 0.001 | TSC22D4    | 0.015 | IGKC      | 0.224 |
| 341 | HK1       | 0.006 | TXN       | 0.006 | SNK1      | 0.001 | ZNF428     | 0.015 | NUAK2     | 0.224 |
| 342 | EI24      | 0.006 | ARHGAP17  | 0.006 | CBX1      | 0.002 | EBP        | 0.015 | ZBTB40    | 0.224 |
| 343 | GNL3      | 0.006 | HDHD1     | 0.006 | CLCC1     | 0.002 | HOOK3      | 0.015 | TIMP1     | 0.224 |
| 344 | CD24      | 0.006 | TUFM      | 0.006 | CXCR3     | 0.002 | NUBP2      | 0.015 | EIF2C2    | 0.224 |
| 345 | DCPS      | 0.006 | MDH2      | 0.006 | DEK       | 0.002 | FBXO11     | 0.015 | ANKRD42   | 0.224 |
| 346 | GORASP2   | 0.006 | HIPK2     | 0.006 | TMEM147   | 0.002 | GOLT1B     | 0.015 | SUMO2     | 0.224 |
| 347 | ITGA3     | 0.006 | ITSN2     | 0.006 | ALG2      | 0.002 | KRAS       | 0.015 | TRAM2     | 0.224 |
| 348 | NDUFA9    | 0.006 | TNFRSF13B | 0.006 | KIF21A    | 0.002 | ST6GALNAC6 | 0.015 | ZYG11A    | 0.224 |
| 349 | INPP5D    | 0.006 | NDUFV2    | 0.006 | TM9SF3    | 0.002 | TANK       | 0.015 | WNT16     | 0.224 |
| 350 | NOM1      | 0.006 | FAM55C    | 0.006 | PDE7A     | 0.002 | DIS3       | 0.015 | PSMD11    | 0.224 |
| 351 | GLT8D1    | 0.006 | ZFP36L1   | 0.006 | P4HB      | 0.002 | RIF1       | 0.015 | ST13      | 0.224 |
| 352 | COX5A     | 0.007 | TOP1      | 0.006 | APOL6     | 0.002 | NCF1       | 0.015 | SERTAD2   | 0.224 |
| 353 | AK3       | 0.007 | MDM2      | 0.006 | PCF11     | 0.002 | TIMM13     | 0.015 | AGAP3     | 0.224 |
| 354 | TMEM64    | 0.007 | DCAF12    | 0.006 | PCM1      | 0.002 | FAM46C     | 0.015 | OGT       | 0.224 |
| 355 | ARRDC1    | 0.007 | SLC35A2   | 0.006 | PKD1      | 0.002 | SETD1A     | 0.015 | GRIN3B    | 0.224 |
| 356 | STARD7    | 0.007 | SDC1      | 0.006 | ZNF275    | 0.002 | VPS54      | 0.015 | RAB11FIP1 | 0.224 |
| 357 | MYO9B     | 0.007 | CTSH      | 0.006 | CERK      | 0.002 | ZNF292     | 0.015 | LOC338758 | 0.224 |
| 358 | COPA      | 0.007 | COL4A3BP  | 0.006 | EIF2S2    | 0.002 | ANUBL1     | 0.015 | TSC22D1   | 0.224 |
| 359 | L3MBTL3   | 0.007 | NCOA3     | 0.006 | STT3B     | 0.002 | PFKL       | 0.015 | JRK       | 0.224 |
| 360 | PACS2     | 0.007 | MYO1B     | 0.006 | SEC63     | 0.002 | EFR3A      | 0.015 | HMGB3     | 0.224 |
| 361 | TPST2     | 0.007 | BCKDK     | 0.006 | AXIN2     | 0.002 | PIK3R5     | 0.015 | IDH2      | 0.224 |
| 362 | ATP5I     | 0.007 | GNAS      | 0.006 | MAN2A1    | 0.002 | POLD2      | 0.015 | CD27      | 0.224 |
| 363 | NUP88     | 0.007 | CR2       | 0.006 | PDIA3     | 0.002 | RSRC2      | 0.015 | ZNF507    | 0.224 |
| 364 | GLUL      | 0.007 | C15orf24  | 0.006 | YKT6      | 0.002 | NCBP1      | 0.015 | TIMM17B   | 0.224 |
| 365 | PI4K2B    | 0.007 | ANAPC5    | 0.007 | HSPA5     | 0.002 | NME4       | 0.015 | NACA      | 0.224 |
| 366 | UGGT1     | 0.007 | HMMR      | 0.007 | CYTIP     | 0.002 | GPSM3      | 0.015 | GAPVD1    | 0.224 |
| 367 | COP21     | 0.007 | TMEM214   | 0.007 | DAPK1     | 0.002 | DPP7       | 0.016 | FCRLA     | 0.224 |
| 368 | DUSP5     | 0.007 | TTC24     | 0.007 | PSEN2     | 0.002 | GUK1       | 0.016 | DDOST     | 0.224 |
| 369 | IERSIP1   | 0.007 | SPARC     | 0.007 | CHPF2     | 0.002 | RAB31      | 0.016 | RPL14     | 0.224 |
| 370 | DENND1B   | 0.007 | BANK1     | 0.007 | SLC39A8   | 0.002 | ERLEC1     | 0.016 | C1RL      | 0.224 |
| 371 | USP35     | 0.007 | C13orf18  | 0.007 | DENND1B   | 0.002 | ZNF107     | 0.016 | KIAA0748  | 0.224 |
| 372 | ZMIZ2     | 0.007 | C14orf156 | 0.007 | C1orf85   | 0.002 | NSUN5      | 0.016 | P4HB      | 0.224 |
| 373 | CKS2      | 0.007 | ZNF525    | 0.007 | C12orf23  | 0.002 | LTN1       | 0.016 | C20orf194 | 0.224 |
| 374 | PDIA4     | 0.007 | MACROD2   | 0.007 | SRP68     | 0.002 | FAM13B     | 0.016 | CAB39L    | 0.224 |

|     |           |       |            |       |          |       |          |       |            |       |
|-----|-----------|-------|------------|-------|----------|-------|----------|-------|------------|-------|
| 375 | PIM2      | 0.007 | C8orf80    | 0.007 | TBL2     | 0.002 | CUL4B    | 0.016 | ABHD12     | 0.224 |
| 376 | KDELRL1   | 0.007 | SLC7A5     | 0.007 | TAB2     | 0.002 | KCTD9    | 0.016 | N6AMT2     | 0.224 |
| 377 | ZFP90     | 0.007 | NUS1       | 0.007 | CAMK2D   | 0.002 | FPGS     | 0.016 | FNIP2      | 0.224 |
| 378 | CD22      | 0.007 | PSMA6      | 0.007 | GNA12    | 0.002 | APC      | 0.016 | CSF3R      | 0.224 |
| 379 | PRKX      | 0.007 | SLC38A5    | 0.007 | VPS54    | 0.002 | TXN2     | 0.016 | TXK        | 0.224 |
| 380 | LDLR      | 0.007 | SDF4       | 0.007 | PITPNM2  | 0.002 | SYNCRIP  | 0.016 | HMBS       | 0.224 |
| 381 | XPO6      | 0.007 | UBP1       | 0.007 | SEC22B   | 0.002 | CCDC91   | 0.016 | ELK3       | 0.224 |
| 382 | PREB      | 0.007 | KLF10      | 0.007 | FER1L4   | 0.002 | JAZF1    | 0.016 | C7orf43    | 0.224 |
| 383 | CCR2      | 0.007 | NOP10      | 0.007 | BCL6     | 0.002 | DMD      | 0.016 | EFCAB4B    | 0.224 |
| 384 | TMEM165   | 0.007 | EIF4G1     | 0.007 | KANK1    | 0.002 | SH3GLB2  | 0.016 | FAM96A     | 0.224 |
| 385 | LEMD2     | 0.007 | GHITM      | 0.007 | RALB     | 0.002 | ATF7IP2  | 0.016 | HM13       | 0.227 |
| 386 | DSTN      | 0.007 | RUNDC2C    | 0.007 | CLN6     | 0.002 | FAM89B   | 0.016 | HAUS6      | 0.227 |
| 387 | PITPNM1   | 0.007 | GYLTL1B    | 0.007 | PRKCB    | 0.002 | SLC44A2  | 0.016 | CELF2      | 0.227 |
| 388 | EHMT2     | 0.007 | CBLN3      | 0.007 | IFNAR1   | 0.002 | SPCS3    | 0.016 | NDUFV2     | 0.227 |
| 389 | COPG      | 0.007 | PARP12     | 0.007 | IGHG1    | 0.002 | NAA50    | 0.016 | SDHAP2     | 0.227 |
| 390 | ATXN2L    | 0.007 | UGGT1      | 0.007 | SDF4     | 0.002 | UBA5     | 0.016 | B3GNT2     | 0.227 |
| 391 | C13orf18  | 0.007 | GF1        | 0.007 | SF1      | 0.002 | ATP6VOC  | 0.016 | COLQ       | 0.227 |
| 392 | MET       | 0.007 | LRRRC8C    | 0.007 | PRKCE    | 0.002 | COASY    | 0.016 | C8orf80    | 0.227 |
| 393 | FDX1      | 0.007 | C14orf139  | 0.007 | TMED2    | 0.002 | MTFR1    | 0.016 | ZNF654     | 0.227 |
| 394 | NDUFV2    | 0.007 | TOP3B      | 0.007 | ZNF271   | 0.002 | ERBB2IP  | 0.016 | PRICKLE2   | 0.227 |
| 395 | TTC39C    | 0.007 | KIAA1147   | 0.007 | SLC35B1  | 0.002 | LIMS2    | 0.016 | ZNF511     | 0.227 |
| 396 | MLLT6     | 0.007 | PLEKHA2    | 0.007 | VAV3     | 0.002 | TWF2     | 0.016 | PLEC       | 0.227 |
| 397 | FAM113A   | 0.007 | CXorf65    | 0.007 | AACS     | 0.002 | CD47     | 0.016 | LOC153684  | 0.227 |
| 398 | FUS       | 0.007 | FNBP4      | 0.007 | GRK5     | 0.002 | GNB2     | 0.016 | DNAH8      | 0.227 |
| 399 | SMPD2     | 0.007 | C2orf67    | 0.007 | HNRNP3   | 0.002 | FNDC3B   | 0.016 | DTWD2      | 0.228 |
| 400 | PHYHD1    | 0.007 | SNX2       | 0.007 | SEC14L1  | 0.002 | CCDC47   | 0.016 | TYMP       | 0.228 |
| 401 | WFS1      | 0.007 | ALG3       | 0.007 | CHI3L2   | 0.002 | MCC      | 0.016 | PLEKHG2    | 0.228 |
| 402 | PSPH      | 0.007 | DDX58      | 0.007 | FUCA2    | 0.002 | CLTB     | 0.016 | ZNF417     | 0.230 |
| 403 | HYOU1     | 0.007 | SNX22      | 0.007 | ANKRD44  | 0.002 | COQ10B   | 0.016 | NF2        | 0.231 |
| 404 | ATP5L     | 0.007 | SP110      | 0.008 | SRGN     | 0.002 | CREB1    | 0.016 | TBC1D22B   | 0.231 |
| 405 | PURB      | 0.007 | GBA        | 0.008 | IDE      | 0.002 | UBA6     | 0.016 | ASPM       | 0.231 |
| 406 | IL21R     | 0.007 | SLC39A9    | 0.008 | ARHGAP24 | 0.002 | MZB1     | 0.016 | SACS       | 0.231 |
| 407 | SCAF8     | 0.007 | SC5DL      | 0.008 | CHID1    | 0.002 | MFN1     | 0.016 | EIF4G1     | 0.232 |
| 408 | DAP       | 0.007 | MAPK6      | 0.008 | DHX9     | 0.002 | ATXN2L   | 0.016 | SLFN5      | 0.233 |
| 409 | ITGB7     | 0.007 | NDUFAB1    | 0.008 | REV1     | 0.002 | TNKS2    | 0.017 | KT112      | 0.234 |
| 410 | ORC3      | 0.007 | PIGT       | 0.008 | BSG      | 0.002 | CEP57    | 0.017 | STAT1      | 0.234 |
| 411 | CDC42BPPB | 0.007 | GMDS       | 0.008 | EPHA4    | 0.002 | SKIV2L2  | 0.017 | C1GALT1C1  | 0.235 |
| 412 | DNAJB11   | 0.007 | AQP3       | 0.008 | ARRB2    | 0.002 | PRKCSH   | 0.017 | FAM168A    | 0.235 |
| 413 | FLJ36031  | 0.007 | ARL5A      | 0.008 | ZNF525   | 0.002 | USO1     | 0.017 | KIAA0664L3 | 0.235 |
| 414 | MOBK11A   | 0.007 | DERL3      | 0.008 | FCRL3    | 0.002 | SIRT7    | 0.017 | RM1        | 0.235 |
| 415 | KDM6B     | 0.007 | SEC61G     | 0.008 | C11orf10 | 0.002 | ZNF678   | 0.017 | SORL1      | 0.235 |
| 416 | CSNK1E    | 0.007 | KLHL14     | 0.008 | SEC61B   | 0.002 | C8orf55  | 0.017 | AUTS2      | 0.235 |
| 417 | ABR       | 0.007 | PTGS1      | 0.008 | SEC11A   | 0.002 | PNPLA6   | 0.017 | ITPRIPL2   | 0.236 |
| 418 | CLCC1     | 0.007 | NUP88      | 0.008 | ALG9     | 0.002 | ACSF3    | 0.017 | LOC646762  | 0.237 |
| 419 | ST8SIA4   | 0.007 | TLR6       | 0.008 | MAN1A2   | 0.002 | ELL2     | 0.017 | SPSB1      | 0.238 |
| 420 | RAP1GDS1  | 0.007 | KIAA0922   | 0.008 | CELF2    | 0.002 | ZNF688   | 0.017 | ADAM9      | 0.238 |
| 421 | CDK6      | 0.007 | TXNDC12    | 0.008 | INPP5D   | 0.002 | ZNF264   | 0.017 | ZSCAN2     | 0.238 |
| 422 | ATG4A     | 0.007 | ATOX1      | 0.008 | NCOA3    | 0.002 | COL18A1  | 0.017 | CASP3      | 0.238 |
| 423 | RTN3      | 0.007 | MRPL48     | 0.008 | APOL1    | 0.002 | STK11    | 0.017 | POLE2      | 0.238 |
| 424 | MAN1A2    | 0.007 | TMED5      | 0.008 | OAS2     | 0.002 | MBD4     | 0.017 | SAMD3      | 0.238 |
| 425 | MICAL3    | 0.007 | DOLPP1     | 0.008 | DNAJC10  | 0.002 | PGLS     | 0.017 | MRPL45     | 0.238 |
| 426 | GLB1      | 0.007 | NCRNA00152 | 0.008 | ADAR     | 0.002 | SART1    | 0.017 | LILRB2     | 0.238 |
| 427 | MSRB2     | 0.007 | HLA-DRB5   | 0.008 | SLC31A1  | 0.002 | GRINA    | 0.017 | DLG4       | 0.238 |
| 428 | SRP19     | 0.007 | TRIM22     | 0.009 | OSTC     | 0.002 | PTK6     | 0.017 | HIPK2      | 0.238 |
| 429 | MRPL33    | 0.007 | PPFIBP1    | 0.009 | ELL2     | 0.002 | ADAM8    | 0.017 | LXN        | 0.238 |
| 430 | FLOT2     | 0.008 | ERGIC2     | 0.009 | RBMS1    | 0.002 | FCER2    | 0.017 | C5orf30    | 0.238 |
| 431 | DDR1      | 0.008 | SNX1       | 0.009 | TMEM59   | 0.002 | ZYG11B   | 0.017 | CEP78      | 0.238 |
| 432 | LAMP2     | 0.008 | LAP3       | 0.009 | OAS1     | 0.002 | KIFC2    | 0.017 | ZBTB37     | 0.238 |
| 433 | MLEC      | 0.008 | CHST12     | 0.009 | MAML2    | 0.002 | NBN      | 0.017 | SUFU       | 0.238 |
| 434 | ALS2CR8   | 0.008 | ABAT       | 0.009 | ARID3A   | 0.002 | SMC6     | 0.017 | GANC       | 0.239 |
| 435 | C7orf43   | 0.008 | DDX60L     | 0.009 | CBFA2T2  | 0.002 | SMARCA4  | 0.017 | KIAA1147   | 0.239 |
| 436 | ZNF559    | 0.008 | APOBEC3B   | 0.009 | KIAA0513 | 0.002 | RABEP1   | 0.017 | RPS23      | 0.240 |
| 437 | SSR1      | 0.008 | PMVK       | 0.009 | AP3D1    | 0.002 | WDR13    | 0.017 | C14orf21   | 0.241 |
| 438 | TM9SF2    | 0.008 | ANKRD36BP2 | 0.009 | CASP3    | 0.002 | TSPO     | 0.017 | CCDC39     | 0.241 |
| 439 | GMIP      | 0.008 | INPP4A     | 0.009 | HYOU1    | 0.002 | MFSD3    | 0.017 | ACOT7      | 0.241 |
| 440 | GIGYF1    | 0.008 | UQCRF51    | 0.009 | CD47     | 0.002 | HS1BP3   | 0.017 | DNAJC3     | 0.241 |
| 441 | HIP1R     | 0.008 | SLC25A46   | 0.009 | DGKA     | 0.002 | MPND     | 0.017 | CFD        | 0.241 |
| 442 | EPHB6     | 0.008 | CD22       | 0.009 | SYNGAP1  | 0.002 | DCAF15   | 0.017 | LY86       | 0.241 |
| 443 | BLK       | 0.008 | BTN2A1     | 0.009 | RRBP1    | 0.002 | HDLBP    | 0.017 | IRAK3      | 0.241 |
| 444 | TNRC6C    | 0.008 | YTHDC2     | 0.009 | ZBTB4    | 0.002 | MAP2K2   | 0.017 | KRBA2      | 0.243 |
| 445 | METTL7A   | 0.008 | BSG        | 0.009 | LRRRC59  | 0.002 | RRM2B    | 0.017 | CRY1       | 0.244 |
| 446 | RPN1      | 0.008 | ATP5J2     | 0.009 | WDR11    | 0.002 | AK3      | 0.017 | ADAM28     | 0.244 |
| 447 | FBXL12    | 0.008 | FCER2      | 0.009 | ZNF622   | 0.003 | BCL7C    | 0.017 | PIGG       | 0.244 |
| 448 | SIK3      | 0.008 | ENO3       | 0.009 | SYVN1    | 0.003 | C20orf27 | 0.017 | CAMK1      | 0.244 |
| 449 | C22orf13  | 0.008 | VOPP1      | 0.009 | WNT5B    | 0.003 | CCDC92   | 0.017 | GLMN       | 0.244 |
| 450 | SLC1A4    | 0.008 | RBM25      | 0.009 | KIAA1147 | 0.003 | DHCR7    | 0.017 | LRTOMT     | 0.244 |
| 451 | CADM1     | 0.008 | UFD1L      | 0.009 | GOLPH3L  | 0.003 | MYO7B    | 0.017 | PCDHGC3    | 0.244 |
| 452 | ADA       | 0.008 | GTF3C6     | 0.009 | IKZF2    | 0.003 | SEC24A   | 0.017 | ZBTB7A     | 0.244 |

|     |              |       |          |       |         |       |          |       |              |       |
|-----|--------------|-------|----------|-------|---------|-------|----------|-------|--------------|-------|
| 453 | CYFIP2       | 0.008 | HERPUD1  | 0.009 | NOMO2   | 0.003 | TECPR1   | 0.017 | DTL          | 0.244 |
| 454 | KDM4B        | 0.008 | ALG2     | 0.009 | SATB1   | 0.003 | PRR14    | 0.018 | PRDX2        | 0.244 |
| 455 | CHD8         | 0.008 | UBE2T    | 0.009 | AIM1    | 0.003 | CWF19L2  | 0.018 | RPS24        | 0.244 |
| 456 | ALG2         | 0.008 | PRKCI    | 0.009 | IRF8    | 0.003 | ERO1L    | 0.018 | PIIB         | 0.244 |
| 457 | ADRBK1       | 0.008 | POLR2L   | 0.009 | C2orf28 | 0.003 | UBXN4    | 0.018 | B9D1         | 0.244 |
| 458 | MAN2A1       | 0.008 | ZNF493   | 0.010 | PRDM1   | 0.003 | ZNF385A  | 0.018 | TXNDC11      | 0.244 |
| 459 | COX7A2       | 0.008 | ZNF234   | 0.010 | OSBP    | 0.003 | UBE2W    | 0.018 | HIST1H2AC    | 0.244 |
| 460 | RCN1         | 0.008 | MBTPS2   | 0.010 | QSOX1   | 0.003 | WDR18    | 0.018 | ACADSB       | 0.245 |
| 461 | CLCN6        | 0.008 | SGK1     | 0.010 | MBNL3   | 0.003 | C6orf211 | 0.018 | NEK3         | 0.245 |
| 462 | MKL1         | 0.008 | PPA1     | 0.010 | NPAT    | 0.003 | TCL1A    | 0.018 | STAC3        | 0.247 |
| 463 | ZNF585B      | 0.008 | ENAH     | 0.010 | GLIPR1  | 0.003 | FASN     | 0.018 | SIL1         | 0.248 |
| 464 | SLC39A9      | 0.008 | CPEB4    | 0.010 | LIME1   | 0.003 | RHOBTB3  | 0.018 | HERPUD2      | 0.248 |
| 465 | MAP3K14      | 0.008 | RAB1A    | 0.010 | AEBP2   | 0.003 | NUDT21   | 0.018 | HECTD1       | 0.248 |
| 466 | ARHGAP30     | 0.008 | CREB3L2  | 0.010 | SHMT2   | 0.003 | TMX1     | 0.018 | BASP1        | 0.248 |
| 467 | COPB1        | 0.008 | ATP5G3   | 0.010 | SMAD4   | 0.003 | NME2     | 0.018 | TMED10       | 0.248 |
| 468 | SUN2         | 0.008 | PLEKHF2  | 0.010 | EPRS    | 0.003 | RAVER1   | 0.018 | PIAS2        | 0.248 |
| 469 | RFC1         | 0.008 | LSP1     | 0.010 | NANS    | 0.003 | STXBP3   | 0.018 | BCAP31       | 0.248 |
| 470 | KIAA0922     | 0.008 | RAB36    | 0.010 | RPS6KA3 | 0.003 | THRA     | 0.018 | FANCD2       | 0.249 |
| 471 | ATF4         | 0.008 | IKBKE    | 0.010 | GPR172A | 0.003 | H2AFX    | 0.018 | C14orf118    | 0.249 |
| 472 | C1orf52      | 0.008 | NDUFB6   | 0.010 | NET1    | 0.003 | PPP5C    | 0.018 | AFG3L1P      | 0.250 |
| 473 | RRAGD        | 0.008 | HLA-DRB1 | 0.010 | DAAM1   | 0.003 | B3GALT6  | 0.018 | PTCD2        | 0.250 |
| 474 | RLTPR        | 0.008 | OAF      | 0.010 | SEC61G  | 0.003 | GMFB     | 0.018 | KIAA1274     | 0.250 |
| 475 | PABPC4       | 0.008 | SP100    | 0.010 | TPM3    | 0.003 | CASP8AP2 | 0.018 | SLC25A45     | 0.250 |
| 476 | UCHL5        | 0.008 | MGAT2    | 0.010 | VCP     | 0.003 | C3orf64  | 0.018 | RBM25        | 0.250 |
| 477 | FDPS         | 0.008 | DMD      | 0.010 | TTYH3   | 0.003 | ERF      | 0.018 | TSEN54       | 0.250 |
| 478 | ZNF804A      | 0.008 | WBSCR22  | 0.010 | TAPBPL  | 0.003 | ATP11C   | 0.018 | NEIL1        | 0.250 |
| 479 | UBE2G1       | 0.008 | EPRS     | 0.010 | VEZF1   | 0.003 | MTR      | 0.018 | SPARC        | 0.250 |
| 480 | GARS         | 0.008 | PLOD1    | 0.010 | BRP44L  | 0.003 | ZNF518A  | 0.018 | PRDX6        | 0.250 |
| 481 | IFNGR2       | 0.008 | FXN      | 0.010 | ITGAM   | 0.003 | TBCB     | 0.018 | ZNF410       | 0.250 |
| 482 | HIP1         | 0.008 | ATPGAP1  | 0.011 | MYO7B   | 0.003 | SPTLC1   | 0.018 | THRA         | 0.250 |
| 483 | PSMD7        | 0.008 | ATF6     | 0.011 | SEC13   | 0.003 | TSHR     | 0.018 | CHAF1A       | 0.250 |
| 484 | FZD3         | 0.008 | COMMD1   | 0.011 | STAR13  | 0.003 | CNOT6    | 0.018 | ARID5B       | 0.250 |
| 485 | CKAP4        | 0.008 | CDV3     | 0.011 | PRDM15  | 0.003 | MRPL3    | 0.018 | GSFG         | 0.250 |
| 486 | C19orf10     | 0.008 | PGRMC2   | 0.011 | APOL2   | 0.003 | PAK4     | 0.018 | SRP19        | 0.250 |
| 487 | PPARD        | 0.008 | PARVG    | 0.011 | PI4K2B  | 0.003 | DVL2     | 0.019 | KCTD3        | 0.250 |
| 488 | SIGIRR       | 0.008 | UQCRC1   | 0.011 | PSIP1   | 0.003 | LYL1     | 0.019 | SPEN         | 0.250 |
| 489 | UTP3         | 0.008 | CNR2     | 0.011 | STIM1   | 0.003 | EIF2AK2  | 0.019 | FASN         | 0.250 |
| 490 | HLA-DQB2     | 0.008 | CDC14A   | 0.011 | SCARB1  | 0.003 | LRRC58   | 0.019 | BMS1P4       | 0.250 |
| 491 | ELL          | 0.008 | UNC119   | 0.011 | SURF4   | 0.003 | DGKZ     | 0.019 | CACNB4       | 0.250 |
| 492 | TCL1A        | 0.008 | MLST8    | 0.011 | GSTM2   | 0.003 | CCDC88A  | 0.019 | STK3         | 0.250 |
| 493 | SH3TC1       | 0.008 | GPRIN3   | 0.011 | PKIG    | 0.003 | S1PR4    | 0.019 | ZNF101       | 0.250 |
| 494 | GPRIN3       | 0.008 | NDUFAF1  | 0.011 | TMEM39A | 0.003 | RNPEL1   | 0.019 | RSF1         | 0.250 |
| 495 | HLA-DMA      | 0.008 | CNP      | 0.011 | FAM65B  | 0.003 | ARRDC1   | 0.019 | MGAT5        | 0.250 |
| 496 | COMMD3       | 0.008 | VDR      | 0.011 | ABLIM1  | 0.003 | KLC4     | 0.019 | TP53INP1     | 0.250 |
| 497 | LRRC59       | 0.008 | DGKA     | 0.011 | MFSD11  | 0.003 | FAM69B   | 0.019 | HMBOX1       | 0.250 |
| 498 | PSMA6        | 0.008 | GUSB     | 0.011 | SLC35E1 | 0.003 | DHX36    | 0.019 | LLPH         | 0.250 |
| 499 | CHPF2        | 0.008 | FAM38A   | 0.011 | ARL6IP5 | 0.003 | C19orf10 | 0.019 | HEATR6       | 0.251 |
| 500 | HRASLS2      | 0.008 | HLA-DPB1 | 0.011 | SETD2   | 0.003 | TRAM2    | 0.019 | EDN1         | 0.251 |
| 501 | PFKFB2       | 0.008 | RBM6     | 0.011 | CR2     | 0.003 | GHDC     | 0.019 | ZBP1         | 0.251 |
| 502 | LOC100506710 | 0.008 | ZNF593   | 0.012 | IRF1    | 0.003 | PHPT1    | 0.019 | FEM1B        | 0.251 |
| 503 | ENTPD7       | 0.008 | TEP1     | 0.012 | PCK2    | 0.003 | AGR1     | 0.019 | RAD54L2      | 0.251 |
| 504 | C14orf145    | 0.009 | SLC4A7   | 0.012 | COPB2   | 0.003 | CDK10    | 0.019 | AMICA1       | 0.251 |
| 505 | HIPK2        | 0.009 | DYNLRB1  | 0.012 | STAR5   | 0.003 | PICALM   | 0.019 | DENND1B      | 0.251 |
| 506 | MGAT2        | 0.009 | VAMP4    | 0.012 | SMEK1   | 0.003 | RNH1     | 0.019 | KIAA1797     | 0.251 |
| 507 | AGPAT6       | 0.009 | MRPL39   | 0.012 | PTPRC   | 0.003 | NDUFB7   | 0.019 | ARID2        | 0.251 |
| 508 | EIF5B        | 0.009 | TSHR     | 0.012 | CASP10  | 0.003 | INTS5    | 0.019 | IFI27L2      | 0.251 |
| 509 | WDFY4        | 0.009 | CD19     | 0.012 | CCNC    | 0.003 | IMPDH1   | 0.019 | SURF4        | 0.252 |
| 510 | FCER2        | 0.009 | TTC14    | 0.012 | CLIC1   | 0.003 | LMAN1    | 0.019 | DNAH1        | 0.252 |
| 511 | MESDC2       | 0.009 | CLCF1    | 0.012 | CD96    | 0.003 | AXIN1    | 0.019 | C3AR1        | 0.252 |
| 512 | SLC30A5      | 0.009 | ATPGV0B  | 0.012 | NCK2    | 0.003 | LMBRD1   | 0.019 | AKAP1        | 0.252 |
| 513 | PAX5         | 0.009 | RFC1     | 0.012 | TRANK1  | 0.003 | IGSF8    | 0.019 | KDM4A        | 0.252 |
| 514 | DRAM2        | 0.009 | TM9SF3   | 0.012 | EXT1    | 0.003 | GRK6     | 0.019 | RPN1         | 0.252 |
| 515 | B9D1         | 0.009 | NDUFA11  | 0.012 | SLC30A5 | 0.003 | VPS26A   | 0.019 | LNPEP        | 0.252 |
| 516 | SYT17        | 0.009 | DYRK2    | 0.012 | DYRK2   | 0.003 | TNFRSF14 | 0.019 | FICD         | 0.252 |
| 517 | NBEA         | 0.009 | SRP68    | 0.012 | MCM9    | 0.003 | ZNF518B  | 0.019 | CHST15       | 0.252 |
| 518 | ARF4         | 0.009 | TXNDC17  | 0.012 | L3MBTL3 | 0.003 | COPB1    | 0.019 | NPAT         | 0.252 |
| 519 | GLTSCR2      | 0.009 | CWC25    | 0.012 | CALR    | 0.003 | FAM20B   | 0.019 | B3GNT7       | 0.252 |
| 520 | ZNF767       | 0.009 | GPRC5D   | 0.012 | MTHFD2  | 0.003 | RPS6KB2  | 0.019 | PARP16       | 0.252 |
| 521 | C9orf72      | 0.009 | PBX2     | 0.012 | SMC6    | 0.003 | TNFSF10  | 0.019 | ZNF624       | 0.252 |
| 522 | FAM65A       | 0.009 | MIXL1    | 0.012 | SUB1    | 0.003 | STK38L   | 0.019 | GPM6B        | 0.252 |
| 523 | CHST15       | 0.009 | DDX49    | 0.012 | CD37    | 0.003 | ADRM1    | 0.019 | LOC100131564 | 0.252 |
| 524 | VOPP1        | 0.009 | ZNF320   | 0.012 | SESN2   | 0.004 | CCDC117  | 0.019 | TASP1        | 0.252 |
| 525 | FAM69A       | 0.009 | NTHL1    | 0.012 | PHF20   | 0.004 | GFPT1    | 0.019 | LRFN1        | 0.252 |
| 526 | KRTCAP2      | 0.009 | GALNT14  | 0.012 | LAIR1   | 0.004 | NPTN     | 0.019 | SGCE         | 0.252 |
| 527 | MINK1        | 0.009 | UBE2G1   | 0.012 | TRAM2   | 0.004 | ZNF296   | 0.019 | NUDT13       | 0.252 |
| 528 | PDE7A        | 0.009 | EDF1     | 0.012 | FITM2   | 0.004 | SGSM3    | 0.019 | SELS         | 0.252 |
| 529 | PLEKHG1      | 0.009 | PLA2G16  | 0.012 | DSTN    | 0.004 | IDH3A    | 0.019 | MYSM1        | 0.252 |
| 530 | SEC13        | 0.009 | CYCS     | 0.012 | FAR2    | 0.004 | PPOX     | 0.019 | KIAA0513     | 0.252 |

|     |          |       |          |       |           |       |           |       |              |       |
|-----|----------|-------|----------|-------|-----------|-------|-----------|-------|--------------|-------|
| 531 | IMPAD1   | 0.009 | SLC25A5  | 0.012 | NAAA      | 0.004 | SENP6     | 0.019 | ZNFS27       | 0.252 |
| 532 | PARVG    | 0.009 | GAS6     | 0.013 | CAMK2N1   | 0.004 | USP53     | 0.019 | CLSTN3       | 0.252 |
| 533 | ATP5A1   | 0.009 | TCF19    | 0.013 | MICAL3    | 0.004 | STK40     | 0.020 | ZYX          | 0.253 |
| 534 | PDE8A    | 0.009 | CD1A     | 0.013 | ITFG1     | 0.004 | EML3      | 0.020 | CD93         | 0.253 |
| 535 | MED15    | 0.009 | CHST15   | 0.013 | HIF1A     | 0.004 | SLFN11    | 0.020 | WDR90        | 0.253 |
| 536 | FAF2     | 0.009 | L3MBTL3  | 0.013 | ALDH18A1  | 0.004 | ATP6V0A2  | 0.020 | STARD3NL     | 0.253 |
| 537 | ARCN1    | 0.009 | SMAD3    | 0.013 | MIER1     | 0.004 | CPNE3     | 0.020 | MZT2A        | 0.253 |
| 538 | GHITM    | 0.009 | UHRF2    | 0.013 | C6orf48   | 0.004 | RBM10     | 0.020 | ANKRD36BP1   | 0.253 |
| 539 | ARL1     | 0.009 | GAPDH    | 0.013 | NEK9      | 0.004 | C14orf80  | 0.020 | C1orf38      | 0.253 |
| 540 | ARRDC2   | 0.009 | ZNF761   | 0.013 | TLE1      | 0.004 | SECISBP2L | 0.020 | SMG6         | 0.253 |
| 541 | FGR      | 0.009 | NOMO3    | 0.013 | GBF1      | 0.004 | CHUK      | 0.020 | RXRA         | 0.253 |
| 542 | TMED9    | 0.009 | DLRAP1   | 0.013 | PEG10     | 0.004 | RANBP2    | 0.020 | C20orf111    | 0.253 |
| 543 | HLA-DOB  | 0.009 | TPST2    | 0.013 | PAIP2B    | 0.004 | RHOT2     | 0.020 | RALY         | 0.253 |
| 544 | ADCY7    | 0.009 | SHMT1    | 0.013 | STK17A    | 0.004 | EIF3K     | 0.020 | YWHAE        | 0.253 |
| 545 | BCAP29   | 0.009 | HNRNPAB  | 0.013 | FAM129C   | 0.004 | C11orf68  | 0.020 | PAG1         | 0.253 |
| 546 | HLA-DOA  | 0.009 | TOP1MT   | 0.013 | P2RX5     | 0.004 | MFSD10    | 0.020 | BARD1        | 0.253 |
| 547 | ARHGAP17 | 0.009 | PSMC3    | 0.013 | PMM2      | 0.004 | BRAT1     | 0.020 | LAPTM4A      | 0.253 |
| 548 | STAT6    | 0.009 | ZDHHC12  | 0.013 | ZNF821    | 0.004 | TMED5     | 0.020 | FAM120B      | 0.254 |
| 549 | HLA-DMB  | 0.009 | ANKRD57  | 0.013 | TAF4      | 0.004 | MFNG      | 0.020 | MMACHC       | 0.254 |
| 550 | TRMT1    | 0.009 | KHNYN    | 0.013 | DAP       | 0.004 | YPEL3     | 0.020 | PLXNA3       | 0.254 |
| 551 | FNDC3A   | 0.009 | POMP     | 0.013 | GLTSCR1   | 0.004 | ZMYM5     | 0.020 | PLD3         | 0.254 |
| 552 | CNPY3    | 0.009 | STAT2    | 0.013 | FTS1      | 0.004 | RINT1     | 0.020 | VPS13A       | 0.254 |
| 553 | NEU1     | 0.009 | CIITA    | 0.013 | FBXW7     | 0.004 | C1orf27   | 0.020 | RNF146       | 0.254 |
| 554 | TBXAS1   | 0.009 | TANC1    | 0.013 | STBD1     | 0.004 | PSME4     | 0.020 | ARL8A        | 0.254 |
| 555 | OXSRI    | 0.009 | FGD2     | 0.013 | CEP120    | 0.004 | MTERF     | 0.020 | LOC100129387 | 0.254 |
| 556 | OSGEP    | 0.009 | WDSUB1   | 0.013 | SPPL2B    | 0.004 | NTSC      | 0.020 | SLC39A10     | 0.254 |
| 557 | ADAP2    | 0.009 | SATB1    | 0.013 | C17orf60  | 0.004 | KCNQ1     | 0.021 | LOC645212    | 0.254 |
| 558 | KLF10    | 0.009 | KIF21A   | 0.013 | DNAJB11   | 0.004 | MMP24     | 0.021 | LOC375190    | 0.254 |
| 559 | SND1     | 0.009 | IBTK     | 0.013 | RERE      | 0.004 | POLG      | 0.021 | LYZ          | 0.255 |
| 560 | PTGES3   | 0.009 | GGA2     | 0.013 | XPO1      | 0.004 | FAM195A   | 0.021 | C3orf62      | 0.255 |
| 561 | TIMD4    | 0.009 | HEXB     | 0.013 | AFF3      | 0.004 | IGHG2     | 0.021 | UQCRRF51     | 0.256 |
| 562 | IER5     | 0.009 | CDC6     | 0.013 | GLG1      | 0.004 | FAM109A   | 0.021 | C6orf192     | 0.256 |
| 563 | NME4     | 0.009 | TMCO1    | 0.013 | GGA2      | 0.004 | SLC25A1   | 0.021 | HCCS         | 0.256 |
| 564 | ABCA2    | 0.009 | AGAP6    | 0.014 | TMX8      | 0.004 | INO80E    | 0.021 | C20orf30     | 0.256 |
| 565 | DERL1    | 0.009 | RNF44    | 0.014 | CXCR7     | 0.004 | OBSCN     | 0.021 | PRDM1        | 0.256 |
| 566 | CNPPD1   | 0.009 | INADL    | 0.014 | PRDX2     | 0.004 | ACTR1B    | 0.021 | PDE1B        | 0.256 |
| 567 | ARHGEP18 | 0.009 | HLA-DOB  | 0.014 | PIM2      | 0.004 | FAM76B    | 0.021 | ATG2B        | 0.256 |
| 568 | FAM129C  | 0.009 | TIA1     | 0.014 | STAT5B    | 0.004 | SLC2A6    | 0.021 | PSMB6        | 0.256 |
| 569 | CCDC115  | 0.009 | ARSB     | 0.014 | HS2ST1    | 0.004 | CCS       | 0.021 | ZNF799       | 0.256 |
| 570 | BMP2K    | 0.009 | TMX8     | 0.014 | RLTPR     | 0.004 | ZNF45     | 0.021 | TIGD5        | 0.257 |
| 571 | E4F1     | 0.009 | PILRB    | 0.014 | SPECC1L   | 0.004 | FLOT2     | 0.021 | HMGNA        | 0.257 |
| 572 | CSNK1G2  | 0.009 | BCL11A   | 0.014 | SOC55     | 0.004 | ATP5D     | 0.021 | PARP15       | 0.257 |
| 573 | GGA3     | 0.009 | GLI1     | 0.014 | PDIA6     | 0.004 | ISOC2     | 0.021 | HGSNAT       | 0.257 |
| 574 | LIMD2    | 0.009 | JUP      | 0.014 | ERP44     | 0.004 | ATRX      | 0.021 | PUM1         | 0.257 |
| 575 | MMADHC   | 0.009 | POMT2    | 0.014 | BMP2K     | 0.004 | LOC730101 | 0.021 | KCND1        | 0.257 |
| 576 | GALK2    | 0.009 | PRRC1    | 0.014 | ZNF266    | 0.004 | SDK2      | 0.021 | C20orf12     | 0.257 |
| 577 | ZNF529   | 0.009 | AIM1     | 0.014 | ACOXL     | 0.004 | PCNXL2    | 0.021 | FKBP2        | 0.257 |
| 578 | PRMT5    | 0.009 | FAM160A2 | 0.014 | LGALS1    | 0.004 | GPX1      | 0.021 | KIAA0125     | 0.258 |
| 579 | MYH9     | 0.009 | CEPT1    | 0.014 | LOC283663 | 0.004 | RAPGEF2   | 0.021 | CKS1B        | 0.258 |
| 580 | FAIM3    | 0.009 | RHBDD3   | 0.014 | LONP1     | 0.004 | MIIP      | 0.021 | CCDC144B     | 0.258 |
| 581 | DTX4     | 0.009 | EIF2S2   | 0.014 | HEXB      | 0.004 | TMEM30A   | 0.021 | LMAN2        | 0.259 |
| 582 | FOXP1    | 0.009 | TMOD2    | 0.014 | IFI30     | 0.004 | CAPN1     | 0.021 | BNIP1        | 0.259 |
| 583 | PIGK     | 0.009 | BIRC3    | 0.014 | MGAT5     | 0.004 | TAOK1     | 0.021 | SPIB         | 0.259 |
| 584 | MRPL3    | 0.009 | C17orf57 | 0.014 | UGGT1     | 0.004 | ARHGAP12  | 0.021 | DFNB31       | 0.259 |
| 585 | SELT     | 0.010 | AP1G2    | 0.014 | NR1P1     | 0.004 | MLLT1     | 0.021 | KIFC1        | 0.259 |
| 586 | DCAF12   | 0.010 | ATP5B    | 0.014 | ZNF395    | 0.004 | STAG2     | 0.021 | UBC          | 0.259 |
| 587 | MAP3K1   | 0.010 | SLC39A14 | 0.014 | ADM       | 0.004 | YTHDF3    | 0.022 | LSM11        | 0.260 |
| 588 | RYK      | 0.010 | PRPF39   | 0.014 | PACS1     | 0.004 | LIPT2     | 0.022 | KCNAB1       | 0.261 |
| 589 | NRAS     | 0.010 | KIAA1033 | 0.014 | RTN3      | 0.004 | KIAA1430  | 0.022 | TSEN34       | 0.262 |
| 590 | BICD2    | 0.010 | ATP6AP2  | 0.014 | SLC39A10  | 0.004 | IGJ       | 0.022 | ESF1         | 0.262 |
| 591 | PRIC285  | 0.010 | PIGK     | 0.015 | SIX5      | 0.004 | KBTBD8    | 0.022 | LOC541471    | 0.262 |
| 592 | FKBP14   | 0.010 | ELL      | 0.015 | BACH2     | 0.004 | HLA-DMB   | 0.022 | SFPQ         | 0.262 |
| 593 | CANX     | 0.010 | C20orf3  | 0.015 | SFXN4     | 0.004 | PTBP1     | 0.022 | ZNF532       | 0.263 |
| 594 | CD79B    | 0.010 | PRDM1    | 0.015 | LARP1B    | 0.004 | NFYB      | 0.022 | CHCHD2       | 0.263 |
| 595 | ZNF846   | 0.010 | CASP3    | 0.015 | C22orf13  | 0.004 | ORAI1     | 0.022 | FAM89B       | 0.263 |
| 596 | NUDT5    | 0.010 | C12orf10 | 0.015 | ISG15     | 0.004 | DLD       | 0.022 | PEX1         | 0.263 |
| 597 | ANG      | 0.010 | STIM2    | 0.015 | UHMK1     | 0.004 | XRN1      | 0.022 | SAMD4A       | 0.263 |
| 598 | HCK      | 0.010 | CD99L2   | 0.015 | C15orf39  | 0.004 | IQCG      | 0.022 | FPGT         | 0.263 |
| 599 | LCN10    | 0.010 | MRPS18A  | 0.015 | DDR1      | 0.004 | PKNOX1    | 0.022 | PLOD1        | 0.263 |
| 600 | KDM4C    | 0.010 | IGF2R    | 0.015 | ZNF529    | 0.004 | ABHD8     | 0.022 | FAM54A       | 0.263 |
| 601 | RNF216   | 0.010 | IKBIP    | 0.015 | N4BP2     | 0.004 | MCTS1     | 0.022 | BNIP3L       | 0.263 |
| 602 | MYO1G    | 0.010 | PARP14   | 0.015 | RCBTB2    | 0.004 | COPB2     | 0.022 | STRADB       | 0.264 |
| 603 | PIM1     | 0.010 | VPS25    | 0.015 | SCAMP5    | 0.004 | SPIN3     | 0.022 | NCOA2        | 0.264 |
| 604 | CHD3     | 0.010 | KMO      | 0.016 | LINS2     | 0.004 | SPPL2B    | 0.022 | MAGED1       | 0.264 |
| 605 | TFG      | 0.010 | SESTD1   | 0.016 | TNFRSF17  | 0.005 | SLC39A4   | 0.022 | ATP6V1E2     | 0.264 |
| 606 | IRF8     | 0.010 | FKBP2    | 0.016 | ZNF418    | 0.005 | RBM25     | 0.022 | TUBA1A       | 0.264 |
| 607 | PHC1     | 0.010 | RALGPS2  | 0.016 | LIMK2     | 0.005 | SH2B2     | 0.022 | LOC644961    | 0.264 |
| 608 | BCL11A   | 0.010 | NET1     | 0.016 | NOTCH2    | 0.005 | CD79B     | 0.022 | LYRM1        | 0.264 |

|     |           |       |           |       |          |       |          |       |              |       |
|-----|-----------|-------|-----------|-------|----------|-------|----------|-------|--------------|-------|
| 609 | IRF4      | 0.010 | C4orf34   | 0.016 | RANBP10  | 0.005 | N4BP2    | 0.022 | EZH2         | 0.264 |
| 610 | CASP3     | 0.010 | HVCN1     | 0.016 | PIK3R5   | 0.005 | TMCO1    | 0.022 | ACADS        | 0.264 |
| 611 | CEPT1     | 0.010 | CEP290    | 0.016 | RAPGEF2  | 0.005 | SREBF1   | 0.022 | P4HA1        | 0.264 |
| 612 | PDDC1     | 0.010 | MS4A1     | 0.016 | BLK      | 0.005 | ESF1     | 0.022 | BROX         | 0.264 |
| 613 | RNF44     | 0.010 | ZFC3H1    | 0.016 | EHD4     | 0.005 | HMHA1    | 0.022 | TRMT5        | 0.265 |
| 614 | TIMM17A   | 0.010 | PHPT1     | 0.016 | ING5     | 0.005 | ORC3     | 0.022 | TYROBP       | 0.265 |
| 615 | TMEM214   | 0.010 | NANS      | 0.016 | PDIK1L   | 0.005 | ICAM2    | 0.022 | CTH          | 0.265 |
| 616 | C6orf129  | 0.010 | ANKZF1    | 0.016 | GPR155   | 0.005 | CPEB4    | 0.022 | APP          | 0.265 |
| 617 | PRKCE     | 0.010 | POP4      | 0.016 | AIFM3    | 0.005 | ZFPL1    | 0.022 | LOC100133991 | 0.265 |
| 618 | GIPR      | 0.010 | NDUFA7    | 0.016 | LRRC42   | 0.005 | LINGO3   | 0.022 | CD1C         | 0.266 |
| 619 | ARHGAP4   | 0.010 | KATNB1    | 0.016 | CHD3     | 0.005 | RNF187   | 0.022 | C10orf2      | 0.266 |
| 620 | PARM1     | 0.010 | TMEM67    | 0.016 | PSMC2    | 0.005 | DCAF17   | 0.022 | SUGP2        | 0.266 |
| 621 | SLC39A7   | 0.010 | E2F7      | 0.016 | ACP2     | 0.005 | DRG2     | 0.022 | ELL2         | 0.266 |
| 622 | BIN1      | 0.010 | BDH2      | 0.016 | FAM172A  | 0.005 | C17orf70 | 0.022 | TYMS         | 0.266 |
| 623 | MORF4L2   | 0.010 | PSMC2     | 0.016 | CEP135   | 0.005 | RIOK2    | 0.022 | HSCB         | 0.266 |
| 624 | COL9A2    | 0.010 | IRF8      | 0.016 | GANAB    | 0.005 | ZZZ3     | 0.022 | BMF          | 0.267 |
| 625 | NUDCD3    | 0.010 | SLC16A1   | 0.016 | HLA-DMA  | 0.005 | MRPL1    | 0.022 | MRPL34       | 0.267 |
| 626 | RFX5      | 0.010 | CERK      | 0.017 | SLC37A1  | 0.005 | SCAF11   | 0.022 | PYGL         | 0.268 |
| 627 | CD74      | 0.010 | LOC202781 | 0.017 | IL10RA   | 0.005 | SLC25A39 | 0.022 | TANC2        | 0.268 |
| 628 | KCTD13    | 0.010 | KIAA1731  | 0.017 | MYO1D    | 0.005 | BAHD1    | 0.022 | SFXN1        | 0.268 |
| 629 | NUP214    | 0.010 | C1orf43   | 0.017 | BANK1    | 0.005 | WNT10A   | 0.022 | WWC1         | 0.269 |
| 630 | SMCR8     | 0.010 | MBNL2     | 0.017 | MAGT1    | 0.005 | PRDX4    | 0.022 | XRN1         | 0.269 |
| 631 | ZNF516    | 0.010 | MAP9      | 0.017 | RCAN3    | 0.005 | PLAA     | 0.022 | DNAH11       | 0.269 |
| 632 | NT5C      | 0.010 | GARS      | 0.017 | IFIT1    | 0.005 | IMP4     | 0.023 | RICTOR       | 0.270 |
| 633 | TXNDC17   | 0.010 | OFD1      | 0.017 | MBP      | 0.005 | LRP10    | 0.023 | PRCP         | 0.270 |
| 634 | TPCN1     | 0.010 | TECR      | 0.017 | NDUFA13  | 0.005 | ARFGEF1  | 0.023 | POMP         | 0.270 |
| 635 | LIMS1     | 0.010 | NDFIP2    | 0.017 | CADM1    | 0.005 | DNAJB11  | 0.023 | CPVL         | 0.271 |
| 636 | SNX22     | 0.010 | FTSJD1    | 0.017 | EBF1     | 0.005 | ABTB1    | 0.023 | EAPP         | 0.271 |
| 637 | MTSS1     | 0.010 | SLC25A23  | 0.017 | ORMDL3   | 0.005 | ERLIN1   | 0.023 | EID2         | 0.271 |
| 638 | LMAN2     | 0.010 | RBM3      | 0.017 | TCTEX1D2 | 0.005 | MRE11A   | 0.023 | HIF1A        | 0.271 |
| 639 | PSMA4     | 0.010 | STOML2    | 0.017 | TAF15    | 0.005 | NDUF57   | 0.023 | TMEM2        | 0.271 |
| 640 | SLC1A5    | 0.010 | TRAF5     | 0.018 | BST2     | 0.005 | HSP90B1  | 0.023 | PCNP         | 0.271 |
| 641 | PRRC2B    | 0.010 | AARS      | 0.018 | ARFGAP1  | 0.005 | INSIG2   | 0.023 | C19orf42     | 0.271 |
| 642 | MRPL13    | 0.010 | CCR2      | 0.018 | ATAD3A   | 0.005 | NFKB2    | 0.023 | ANLN         | 0.271 |
| 643 | C20orf3   | 0.010 | HARS2     | 0.018 | HLA-DRA  | 0.005 | TMEM184B | 0.023 | BYSL         | 0.271 |
| 644 | ZNF548    | 0.010 | SDHA      | 0.018 | NOMO3    | 0.005 | FNIP1    | 0.023 | POLG2        | 0.271 |
| 645 | DYNLL2    | 0.010 | ECHS1     | 0.018 | ZNF320   | 0.005 | FES      | 0.023 | CHPF         | 0.271 |
| 646 | GPR180    | 0.010 | RYK       | 0.018 | ARRDC2   | 0.005 | ARF5     | 0.023 | ZNF621       | 0.271 |
| 647 | BMP6      | 0.010 | PSMA2     | 0.018 | CARS     | 0.005 | SYNPO    | 0.023 | ZNF192       | 0.271 |
| 648 | GGH       | 0.010 | PARK7     | 0.018 | UCK2     | 0.005 | N4BP2L2  | 0.023 | SLFN13       | 0.271 |
| 649 | RASSF1    | 0.010 | ITPR3     | 0.018 | ASAP1    | 0.005 | LYSMD3   | 0.023 | DUSP16       | 0.271 |
| 650 | ERN1      | 0.010 | JRKL      | 0.018 | MLL76    | 0.005 | SCFD1    | 0.023 | ZNF37BP      | 0.271 |
| 651 | UBA5      | 0.010 | PATL1     | 0.018 | TMEM70   | 0.005 | DHRS13   | 0.023 | TBC1D16      | 0.271 |
| 652 | GNB5      | 0.010 | PIF1      | 0.018 | NEK8     | 0.005 | ERGIC2   | 0.023 | NCRNA00183   | 0.271 |
| 653 | TRAK1     | 0.010 | MEI1      | 0.018 | RRM2B    | 0.005 | ST3GAL2  | 0.023 | LRRCS9       | 0.271 |
| 654 | DIEXF     | 0.010 | C3orf52   | 0.018 | SLC10A7  | 0.005 | SRFBP1   | 0.023 | ISG20        | 0.271 |
| 655 | EHD1      | 0.010 | PDHX      | 0.018 | PDGFD    | 0.005 | REXO1    | 0.023 | ZNF256       | 0.271 |
| 656 | TP53INP1  | 0.010 | CYBASC3   | 0.018 | NFATC1   | 0.005 | TMEM188  | 0.023 | ERP27        | 0.271 |
| 657 | UBXN4     | 0.010 | ERH       | 0.018 | FAIM3    | 0.005 | HNRNPUL2 | 0.023 | LOC285359    | 0.272 |
| 658 | TGFB1     | 0.010 | TNFRSF13C | 0.018 | GUK1     | 0.005 | POLM     | 0.023 | XIST         | 0.272 |
| 659 | XYLT2     | 0.010 | HLA-DOA   | 0.018 | DFDT1    | 0.005 | PPDPF    | 0.023 | APOBR        | 0.272 |
| 660 | LRPAP1    | 0.010 | ZNF333    | 0.018 | KLHL6    | 0.005 | HEXDC    | 0.023 | PHF15        | 0.272 |
| 661 | SGCE      | 0.010 | CAMK2D    | 0.018 | TRAK1    | 0.005 | EIF4EBP1 | 0.023 | NRIP1        | 0.272 |
| 662 | CBX7      | 0.010 | EIF5A     | 0.018 | ANKIB1   | 0.005 | SNRNP70  | 0.023 | REL          | 0.272 |
| 663 | SRPR      | 0.010 | DNAJB9    | 0.018 | PGM3     | 0.005 | ABCA2    | 0.023 | ANKMY1       | 0.272 |
| 664 | SF1       | 0.010 | ZNF107    | 0.018 | KIF13A   | 0.005 | SACM1L   | 0.023 | KIAA1199     | 0.272 |
| 665 | ERO1L     | 0.010 | KCTD7     | 0.019 | GOLGA3   | 0.005 | RPS6KA3  | 0.023 | CHCHD3       | 0.272 |
| 666 | UNC119    | 0.010 | NUP43     | 0.019 | PNPLA7   | 0.005 | CRIP2    | 0.023 | HDHD3        | 0.272 |
| 667 | MYO1E     | 0.010 | CYC1      | 0.019 | CASP8AP2 | 0.005 | SAMSN1   | 0.023 | SEL1L        | 0.272 |
| 668 | PRKCB     | 0.010 | TMEM175   | 0.019 | CDCA7L   | 0.005 | CAND1    | 0.023 | GON4L        | 0.272 |
| 669 | XKRX      | 0.010 | MICAL3    | 0.019 | FAM116B  | 0.005 | ZNF92    | 0.023 | POGLUT1      | 0.272 |
| 670 | GGA2      | 0.010 | SLC7A11   | 0.019 | CHCHD2   | 0.005 | CKAP4    | 0.023 | SEC24D       | 0.272 |
| 671 | PPP1R12C  | 0.010 | CNPY2     | 0.019 | KDM4A    | 0.005 | IFITM2   | 0.023 | LOC100130691 | 0.272 |
| 672 | SIPA1L1   | 0.010 | AHCY      | 0.019 | OST4     | 0.005 | AURKAIP1 | 0.023 | MTG1         | 0.272 |
| 673 | ELF4      | 0.010 | CLTC      | 0.019 | INADL    | 0.005 | EXOSC5   | 0.024 | FAM118A      | 0.272 |
| 674 | RGS19     | 0.010 | RLTPR     | 0.019 | SNX10    | 0.005 | MUS81    | 0.024 | C8orf76      | 0.272 |
| 675 | IDI1      | 0.010 | TBL2      | 0.019 | ARF1     | 0.005 | NCEH1    | 0.024 | NLRCS5       | 0.273 |
| 676 | MDM2      | 0.010 | SYNGAP1   | 0.019 | ZFP161   | 0.005 | LLGL1    | 0.024 | ANKRD36      | 0.273 |
| 677 | BCAS4     | 0.010 | MOBK1A    | 0.019 | ZDHHC2   | 0.005 | TBRG4    | 0.024 | HDLBP        | 0.273 |
| 678 | NANS      | 0.010 | GSTP1     | 0.019 | NEK1     | 0.005 | DUS3L    | 0.024 | LRRC16B      | 0.273 |
| 679 | ALG14     | 0.010 | SLC25A3   | 0.020 | TIMM17B  | 0.005 | HDAC9    | 0.024 | TNFRSF8      | 0.273 |
| 680 | CRLF3     | 0.010 | NDUFA13   | 0.020 | CCDC93   | 0.005 | MUDENG   | 0.024 | TARDBP       | 0.273 |
| 681 | DAGLB     | 0.010 | ARMCX3    | 0.020 | OAT      | 0.006 | HAGHL    | 0.024 | LGALS1       | 0.274 |
| 682 | METTL4    | 0.010 | CHCHD1    | 0.020 | ELL      | 0.006 | PWWP2B   | 0.024 | SIRPB1       | 0.274 |
| 683 | LOC253039 | 0.010 | GTF2A2    | 0.020 | DCPS     | 0.006 | SLC25A24 | 0.024 | MYO1D        | 0.274 |
| 684 | EBF1      | 0.010 | PLOD3     | 0.020 | IGF1     | 0.006 | PLEKHM2  | 0.024 | RRBP1        | 0.274 |
| 685 | GPRC5D    | 0.010 | IGKC      | 0.020 | ITSN2    | 0.006 | FUK      | 0.024 | GYG1         | 0.274 |
| 686 | ORAI3     | 0.010 | BACE1     | 0.020 | CDK6     | 0.006 | DPP9     | 0.024 | SRRM2        | 0.275 |

|     |              |       |              |       |           |       |          |       |           |       |
|-----|--------------|-------|--------------|-------|-----------|-------|----------|-------|-----------|-------|
| 687 | POU2F2       | 0.010 | TRAPPC2L     | 0.020 | LDOC1     | 0.006 | CTDP1    | 0.024 | APOO      | 0.275 |
| 688 | KLHL2        | 0.010 | ENTPD7       | 0.020 | C14orf147 | 0.006 | SYT17    | 0.024 | DHX15     | 0.275 |
| 689 | ATP2A2       | 0.010 | GALK2        | 0.020 | TXLNG     | 0.006 | PPP1R12A | 0.024 | ARNT      | 0.275 |
| 690 | SIDT2        | 0.010 | EEFSEC       | 0.020 | TBC1D23   | 0.006 | E4F1     | 0.024 | RPS27L    | 0.275 |
| 691 | C11orf10     | 0.010 | RAD52        | 0.020 | LSM14B    | 0.006 | MIER2    | 0.024 | AHNAK     | 0.275 |
| 692 | SARM1        | 0.010 | B3GNT9       | 0.020 | ASS1      | 0.006 | TBL1XR1  | 0.024 | DAG1      | 0.275 |
| 693 | CYBB         | 0.010 | ERO1L        | 0.020 | YIF1A     | 0.006 | DNLZ     | 0.024 | PPP2R3C   | 0.275 |
| 694 | PAPOLG       | 0.010 | ZNF195       | 0.020 | EIF4G1    | 0.006 | MTAP     | 0.024 | ZXDC      | 0.275 |
| 695 | TRAF3IP2     | 0.010 | PRDX3        | 0.020 | RNF44     | 0.006 | FAM195B  | 0.024 | SLC1A4    | 0.276 |
| 696 | SNX1         | 0.010 | HNRPDL       | 0.020 | PIK3IP1   | 0.006 | ZNF644   | 0.024 | SEC61B    | 0.277 |
| 697 | ARHGEF1      | 0.010 | NDUFA9       | 0.020 | DSE       | 0.006 | ZHX1     | 0.024 | MRV11     | 0.277 |
| 698 | USP38        | 0.010 | SPTY2D1      | 0.020 | SDCBP     | 0.006 | REPIN1   | 0.024 | RPUSD2    | 0.278 |
| 699 | UBTF         | 0.010 | TNFRSF10B    | 0.020 | CADPS2    | 0.006 | ELOF1    | 0.024 | CIT       | 0.278 |
| 700 | IFI35        | 0.010 | CEP110       | 0.020 | NAPA      | 0.006 | SGSH     | 0.024 | GMPR2     | 0.279 |
| 701 | CR1          | 0.010 | ADPGK        | 0.020 | R3HCC1    | 0.006 | TOR1AIP2 | 0.024 | LYPLA1    | 0.279 |
| 702 | GNAS         | 0.010 | ZNF318       | 0.020 | IRAK1     | 0.006 | JMJD8    | 0.024 | LOC283104 | 0.279 |
| 703 | SRRM1        | 0.010 | ALDH18A1     | 0.020 | DTX4      | 0.006 | SNX8     | 0.024 | PCNT      | 0.279 |
| 704 | GRB2         | 0.010 | MESDC2       | 0.020 | COPB1     | 0.006 | KMO      | 0.024 | CD4       | 0.279 |
| 705 | MAP4K2       | 0.010 | FAM65A       | 0.020 | RHBDD3    | 0.006 | RPS14    | 0.024 | LRRC37A4  | 0.280 |
| 706 | GBA          | 0.010 | CDKN3        | 0.021 | CLTC      | 0.006 | MVP      | 0.024 | MTHFD2    | 0.280 |
| 707 | FAHD2A       | 0.010 | MRPL3        | 0.021 | NAGLU     | 0.006 | PAFAH1B2 | 0.024 | RASGRP1   | 0.281 |
| 708 | CCNL2        | 0.010 | GUK1         | 0.021 | MESDC2    | 0.006 | C5orf51  | 0.024 | TRIM3     | 0.281 |
| 709 | POU2AF1      | 0.010 | MRPS7        | 0.021 | RPL36AL   | 0.006 | IDH3G    | 0.024 | TNFSF12   | 0.281 |
| 710 | PLOD1        | 0.010 | C2orf18      | 0.021 | OFD1      | 0.006 | C1orf35  | 0.024 | FAM116B   | 0.281 |
| 711 | GOLGB1       | 0.010 | WARS         | 0.021 | APOBEC3G  | 0.006 | ZBTB1    | 0.024 | IFRD2     | 0.281 |
| 712 | SYTL3        | 0.010 | MRPS15       | 0.021 | PHF15     | 0.006 | TXNDC11  | 0.024 | CCNT1     | 0.281 |
| 713 | SLC41A2      | 0.010 | PSMB6        | 0.021 | KLF12     | 0.006 | ZBTB41   | 0.024 | DHX29     | 0.281 |
| 714 | SERPINB9     | 0.010 | CTNNA1       | 0.022 | GCNT1     | 0.006 | THOC2    | 0.024 | LRRK1     | 0.282 |
| 715 | 41528.000    | 0.010 | FUCA2        | 0.022 | C17orf91  | 0.006 | FANCM    | 0.024 | AQP3      | 0.282 |
| 716 | CLTC         | 0.010 | NME1         | 0.022 | ATP6V0B   | 0.006 | MNDA     | 0.024 | TMEM5     | 0.282 |
| 717 | NCOA3        | 0.010 | TP73         | 0.022 | EDF1      | 0.006 | VKORC1L1 | 0.024 | MAN1A1    | 0.282 |
| 718 | LCK          | 0.010 | ELOF1        | 0.022 | ZNF215    | 0.006 | C8orf82  | 0.024 | ZBED6     | 0.282 |
| 719 | MMP11        | 0.010 | PSMD9        | 0.022 | LYSMD3    | 0.006 | PNPLA2   | 0.024 | BCL2A1    | 0.282 |
| 720 | MLL5         | 0.010 | TMED1        | 0.022 | CCND3     | 0.006 | SLC25A32 | 0.024 | SEC61A1   | 0.283 |
| 721 | FOXJ2        | 0.010 | ZADH2        | 0.022 | COL19A1   | 0.006 | RNF149   | 0.024 | RNF144A   | 0.283 |
| 722 | LBH          | 0.010 | ZNF12        | 0.022 | TMEM2     | 0.006 | ATF6B    | 0.024 | CHST2     | 0.283 |
| 723 | C15orf44     | 0.010 | DNAJC7       | 0.022 | PLEKHA1   | 0.006 | CAMK2D   | 0.024 | DGCR14    | 0.284 |
| 724 | HTT          | 0.010 | PRDX1        | 0.022 | SLC6A9    | 0.006 | ZNF628   | 0.024 | FOS       | 0.285 |
| 725 | PRDM4        | 0.010 | ZNF516       | 0.022 | SHC1      | 0.006 | GLTSCR1  | 0.024 | DNAJC5B   | 0.285 |
| 726 | EIF2S2       | 0.010 | PTBP2        | 0.022 | ZNF238    | 0.006 | SS18     | 0.024 | RPF1      | 0.285 |
| 727 | ZNF786       | 0.010 | ZSCAN18      | 0.022 | TMOD2     | 0.006 | ADRBK1   | 0.024 | DDT       | 0.285 |
| 728 | ZNF335       | 0.010 | FTSJ1        | 0.022 | MSN       | 0.006 | MAP4K2   | 0.024 | TNIK      | 0.286 |
| 729 | C2orf88      | 0.010 | MTHFD2       | 0.022 | SRSF9     | 0.006 | TAB1     | 0.024 | CINP      | 0.286 |
| 730 | GPR132       | 0.010 | COX5B        | 0.022 | EIF4A2    | 0.006 | IGKC     | 0.024 | CRELD2    | 0.286 |
| 731 | PAPSS1       | 0.010 | KIAA2013     | 0.022 | METTL21A  | 0.006 | SDF4     | 0.025 | C13orf1   | 0.286 |
| 732 | KCNG1        | 0.010 | TIMM13       | 0.023 | NAB1      | 0.006 | CCR2     | 0.025 | SLC7A5    | 0.286 |
| 733 | LOC100499466 | 0.010 | APOBEC3C     | 0.023 | ZNF585B   | 0.006 | EPS15    | 0.025 | SNTA1     | 0.286 |
| 734 | SFMBT1       | 0.010 | SPCS2        | 0.023 | ADM2      | 0.007 | UNC13D   | 0.025 | ABCA11P   | 0.286 |
| 735 | CRAMP1L      | 0.010 | ADAM10       | 0.023 | SEC31A    | 0.007 | TMUB1    | 0.025 | COQ10B    | 0.286 |
| 736 | TSPAN33      | 0.010 | YIF1A        | 0.023 | LIMD2     | 0.007 | GYLTL1B  | 0.025 | C7orf68   | 0.286 |
| 737 | CEP110       | 0.010 | SYT1         | 0.023 | ZNF592    | 0.007 | APBA3    | 0.025 | ITFG1     | 0.286 |
| 738 | TRIM65       | 0.010 | AAK1         | 0.023 | ARL1      | 0.007 | IGF1     | 0.025 | NFATC3    | 0.286 |
| 739 | POLR1E       | 0.010 | ZNF717       | 0.023 | LRRRC8D   | 0.007 | ASNA1    | 0.025 | MFSD5     | 0.286 |
| 740 | PPM1F        | 0.010 | ARHGAP9      | 0.023 | ETFHD     | 0.007 | ZMIZ2    | 0.025 | LOC148696 | 0.287 |
| 741 | KDEL2        | 0.011 | PDIA3        | 0.023 | ZNF25     | 0.007 | CXXC5    | 0.025 | UAP1      | 0.287 |
| 742 | RERE         | 0.011 | KDM4C        | 0.023 | CCDC47    | 0.007 | DNAJC4   | 0.025 | ALG10B    | 0.287 |
| 743 | MBTPS1       | 0.011 | LYSMD2       | 0.023 | GLUL      | 0.007 | ACAP1    | 0.025 | ACAD10    | 0.287 |
| 744 | CRTC2        | 0.011 | RAB40B       | 0.023 | LTA4H     | 0.007 | BHLHE41  | 0.025 | ABCC2     | 0.287 |
| 745 | TMEM184B     | 0.011 | ARCN1        | 0.023 | KIAA0114  | 0.007 | ITGB2    | 0.025 | DCPS      | 0.287 |
| 746 | SLC38A5      | 0.011 | ZNF117       | 0.023 | SMAP2     | 0.007 | RAD50    | 0.025 | AKAP13    | 0.287 |
| 747 | PWWP2B       | 0.011 | CEP135       | 0.023 | BCL11A    | 0.007 | SIPA1    | 0.025 | ATF7IP    | 0.287 |
| 748 | CLPTM1L      | 0.011 | TMEM39A      | 0.023 | FOXP1     | 0.007 | HSPB1    | 0.025 | ZNF329    | 0.288 |
| 749 | CARNS1       | 0.011 | GLB1         | 0.023 | PRDM4     | 0.007 | AKAP9    | 0.025 | UHRF1     | 0.288 |
| 750 | CIITA        | 0.011 | LOC100499466 | 0.023 | C17orf87  | 0.007 | WDR36    | 0.025 | TARBP1    | 0.288 |
| 751 | XPOT         | 0.011 | SEC31A       | 0.023 | DCP1A     | 0.007 | SLC38A2  | 0.025 | ARL10     | 0.288 |
| 752 | CLCN7        | 0.011 | ATG16L1      | 0.023 | WDR19     | 0.007 | TOR2A    | 0.025 | CHI3L2    | 0.288 |
| 753 | DLAT         | 0.011 | GLRX         | 0.023 | ALG14     | 0.007 | JUP      | 0.025 | ARHGAP33  | 0.288 |
| 754 | SPINT1       | 0.011 | LRRRC8A      | 0.023 | SUMF2     | 0.007 | PHF20L1  | 0.025 | MIMP25    | 0.288 |
| 755 | RSAD1        | 0.011 | SNX4         | 0.023 | SDCCAG3   | 0.007 | ZNF800   | 0.025 | NEK2      | 0.288 |
| 756 | PDIA3        | 0.011 | LITAF        | 0.024 | HIP1      | 0.007 | HDHD2    | 0.025 | LMNB2     | 0.288 |
| 757 | VCP          | 0.011 | PARP15       | 0.024 | ZNF337    | 0.007 | CABIN1   | 0.025 | MCOLN2    | 0.288 |
| 758 | RAB37        | 0.011 | RP519BP1     | 0.024 | RECK      | 0.007 | LASS4    | 0.025 | EP300     | 0.288 |
| 759 | ZSCAN18      | 0.011 | LSM3         | 0.024 | TM9SF1    | 0.007 | EHMT2    | 0.025 | RNF19B    | 0.289 |
| 760 | PCF11        | 0.011 | CCDC50       | 0.024 | KDM6B     | 0.007 | SPNS1    | 0.025 | SUPT3H    | 0.289 |
| 761 | ANK1         | 0.011 | RASA1        | 0.024 | PIP4K2B   | 0.007 | CPSF1    | 0.025 | EIF2C3    | 0.289 |
| 762 | MAU2         | 0.011 | PLEKHG1      | 0.024 | SDF2L1    | 0.007 | IPO8     | 0.025 | SBDS      | 0.289 |
| 763 | PSTPIP1      | 0.011 | CCDC124      | 0.024 | 41527.000 | 0.007 | C7orf55  | 0.025 | KCTD9     | 0.290 |
| 764 | BRP44L       | 0.011 | GOLPH3       | 0.024 | ZSCAN18   | 0.007 | LIME1    | 0.025 | ZNF2      | 0.290 |

|     |           |       |           |       |              |       |          |       |              |       |
|-----|-----------|-------|-----------|-------|--------------|-------|----------|-------|--------------|-------|
| 765 | KDM2B     | 0.011 | ZMAT1     | 0.024 | HLA-DOB      | 0.007 | AGPAT2   | 0.025 | MAP3K4       | 0.290 |
| 766 | GYLTL1B   | 0.011 | SDHAP3    | 0.024 | TMED3        | 0.007 | FAM69A   | 0.025 | SLC44A1      | 0.290 |
| 767 | STIM2     | 0.011 | STX7      | 0.024 | CBX7         | 0.007 | APPL1    | 0.025 | ATP5A1       | 0.290 |
| 768 | SLC17A9   | 0.011 | ZNF395    | 0.025 | ALG1         | 0.007 | CAPNS1   | 0.025 | GPAM         | 0.290 |
| 769 | LPCAT4    | 0.011 | SMCR7L    | 0.025 | ATP2A2       | 0.007 | ARHGAP4  | 0.025 | NETO2        | 0.290 |
| 770 | PKD1      | 0.011 | C19orf63  | 0.025 | FMNL3        | 0.007 | LTBP4    | 0.025 | P2RX7        | 0.291 |
| 771 | NAT10     | 0.011 | CTSD      | 0.025 | ANAPC16      | 0.007 | FBXL15   | 0.026 | FASTKD3      | 0.291 |
| 772 | AFG3L1P   | 0.011 | BCL2      | 0.025 | DBNL         | 0.007 | WDR81    | 0.026 | ERLIN1       | 0.291 |
| 773 | AGA       | 0.011 | CDKN2C    | 0.025 | ITM2B        | 0.007 | PDIA4    | 0.026 | BOLA1        | 0.291 |
| 774 | LYN       | 0.011 | LY86      | 0.025 | CAST         | 0.007 | SEPN1    | 0.026 | ATXN1        | 0.291 |
| 775 | SMOX      | 0.011 | PSME1     | 0.025 | SELT         | 0.007 | PRPF4B   | 0.026 | FAM18A       | 0.292 |
| 776 | TBC1D22A  | 0.011 | TMEM64    | 0.025 | MCF2L        | 0.007 | ARMC10   | 0.026 | KIAA1467     | 0.292 |
| 777 | HSF4      | 0.011 | CHD7      | 0.025 | CCNDBP1      | 0.007 | LRWD1    | 0.026 | FBN1         | 0.292 |
| 778 | ZNF768    | 0.011 | CBR1      | 0.025 | TRABD        | 0.007 | ASPSCR1  | 0.026 | MKS1         | 0.292 |
| 779 | TXNDC5    | 0.011 | MIF       | 0.025 | ATG12        | 0.007 | SMAD2    | 0.026 | FAM126A      | 0.292 |
| 780 | NEK2      | 0.011 | CSRP1     | 0.025 | LOC100129034 | 0.007 | SIGIRR   | 0.026 | TTC24        | 0.292 |
| 781 | RINL      | 0.011 | PRPF4B    | 0.025 | LRRFIP1      | 0.007 | FAM107B  | 0.026 | BUB1B        | 0.293 |
| 782 | SRA1      | 0.011 | MPHOSPH8  | 0.025 | LAPTM5       | 0.007 | APAF1    | 0.026 | LMNA         | 0.293 |
| 783 | CCDC88B   | 0.011 | ATP5G1    | 0.025 | SPIN1        | 0.007 | TRMT2A   | 0.026 | 41336.000    | 0.293 |
| 784 | STAP1     | 0.011 | FAM178A   | 0.025 | MPG          | 0.007 | MANEA    | 0.026 | STARD5       | 0.293 |
| 785 | CYP51A1   | 0.011 | COPS2     | 0.026 | SDCCAG8      | 0.007 | C12orf52 | 0.026 | HSPA5        | 0.293 |
| 786 | ACSS1     | 0.011 | RUFY1     | 0.026 | FAM65A       | 0.007 | FCGBP    | 0.026 | TMEM159      | 0.293 |
| 787 | CCDC93    | 0.011 | GCA       | 0.026 | SAV1         | 0.007 | SLC30A6  | 0.026 | PPP4R1L      | 0.293 |
| 788 | SLC35B1   | 0.011 | CRTC2     | 0.026 | NDUFV2       | 0.007 | PDIA5    | 0.026 | CADM1        | 0.293 |
| 789 | HHEX      | 0.011 | AFF3      | 0.026 | ZMAT1        | 0.007 | GYPC     | 0.026 | LMAN1        | 0.293 |
| 790 | TMBIM1    | 0.011 | DDX26B    | 0.026 | C16orf58     | 0.007 | RNMT     | 0.026 | TMEM110      | 0.293 |
| 791 | IGLL1     | 0.011 | FAM116B   | 0.026 | HIVEP1       | 0.007 | FEM1C    | 0.026 | PRPSAP2      | 0.293 |
| 792 | EPAS1     | 0.011 | NUP160    | 0.026 | PPARD        | 0.007 | RMND5B   | 0.026 | MANF         | 0.293 |
| 793 | C13orf15  | 0.011 | KRTCAP2   | 0.026 | RAB3D        | 0.007 | RHBDD1   | 0.026 | CHST7        | 0.293 |
| 794 | ZMPSTE24  | 0.011 | RHOB      | 0.026 | FAM53B       | 0.007 | COMT     | 0.026 | SPCS1        | 0.293 |
| 795 | TBP       | 0.011 | COX6B1    | 0.026 | PDS5A        | 0.007 | NDUFAF3  | 0.026 | ELK4         | 0.293 |
| 796 | JUP       | 0.011 | NFKBID    | 0.026 | ROD1         | 0.007 | ZNF865   | 0.026 | RSG1         | 0.293 |
| 797 | PIK3AP1   | 0.011 | MRPS16    | 0.026 | HP1BP3       | 0.007 | MBLAC2   | 0.026 | SCARNA9      | 0.293 |
| 798 | ZBTB80S   | 0.011 | TTC12     | 0.026 | FCHO2        | 0.007 | ITPKB    | 0.026 | CST3         | 0.293 |
| 799 | FAM100B   | 0.011 | REL       | 0.026 | SSBP2        | 0.007 | CCM2     | 0.026 | ANG          | 0.294 |
| 800 | C15orf24  | 0.011 | CELF1     | 0.026 | TBC1D1       | 0.007 | TBC1D23  | 0.026 | ZFP28        | 0.294 |
| 801 | COPS2     | 0.011 | RAPGEF2   | 0.026 | SPCS2        | 0.007 | MAD2L2   | 0.026 | SERPINA1     | 0.294 |
| 802 | LHFPL2    | 0.011 | PTTG1     | 0.026 | CLINT1       | 0.007 | MED15    | 0.026 | STT3A        | 0.294 |
| 803 | PSMC2     | 0.011 | AVEN      | 0.026 | C7orf11      | 0.007 | SF3B4    | 0.026 | SORT1        | 0.294 |
| 804 | ERP44     | 0.011 | SCAF4     | 0.026 | ZFP36L1      | 0.008 | ZNF100   | 0.026 | PEAK1        | 0.294 |
| 805 | MAP2K6    | 0.011 | C5orf24   | 0.026 | TMEM198      | 0.008 | TMEM134  | 0.026 | MX11         | 0.294 |
| 806 | PLEC      | 0.011 | MYADM     | 0.026 | MYST3        | 0.008 | TPCN1    | 0.026 | LIMA1        | 0.294 |
| 807 | UBAP2     | 0.011 | NAA25     | 0.026 | C1GALT1C1    | 0.008 | SLC30A7  | 0.026 | LOC96610     | 0.294 |
| 808 | FOXJ3     | 0.011 | IFNAR1    | 0.026 | ZNHIT6       | 0.008 | USP25    | 0.026 | QPCTL        | 0.295 |
| 809 | IFNAR1    | 0.011 | PDXK      | 0.026 | IGHG3        | 0.008 | ZNF208   | 0.026 | C9orf100     | 0.295 |
| 810 | SORBS3    | 0.011 | PTPRG     | 0.026 | LOC100506710 | 0.008 | OGFR     | 0.026 | MKI67        | 0.295 |
| 811 | RUFY1     | 0.011 | DCAF10    | 0.026 | CNTNAP2      | 0.008 | EBF1     | 0.026 | TMEM177      | 0.296 |
| 812 | PLEKHO1   | 0.011 | CHML      | 0.026 | USP18        | 0.008 | WDTC1    | 0.026 | ZCCHC11      | 0.297 |
| 813 | SURF4     | 0.011 | HNRNPH1   | 0.026 | SRP19        | 0.008 | GNPDA2   | 0.026 | C12orf51     | 0.298 |
| 814 | TRAPP2    | 0.011 | NDUFA1    | 0.026 | MMP11        | 0.008 | ZDHHC24  | 0.026 | MBD5         | 0.298 |
| 815 | PSMB1     | 0.011 | C18orf25  | 0.026 | KIAA0430     | 0.008 | FBXO28   | 0.026 | C11orf57     | 0.298 |
| 816 | SPG11     | 0.011 | NETO2     | 0.026 | RBM14        | 0.008 | ZNF512   | 0.026 | PSMC1        | 0.298 |
| 817 | DCK       | 0.011 | ECH1      | 0.026 | LOC284749    | 0.008 | ZBTB33   | 0.026 | ANKAR        | 0.298 |
| 818 | PDIA6     | 0.011 | MCAT      | 0.027 | LPGAT1       | 0.008 | TTC7A    | 0.026 | NAV1         | 0.299 |
| 819 | ARGLU1    | 0.011 | SFT2D2    | 0.027 | PARP16       | 0.008 | DOCK11   | 0.026 | CCL28        | 0.299 |
| 820 | ABC4      | 0.011 | USPL1     | 0.027 | SLC44A2      | 0.008 | SGPP1    | 0.026 | IGHE         | 0.300 |
| 821 | GIT2      | 0.011 | SLC35B2   | 0.027 | SLC39A11     | 0.008 | NCF1B    | 0.026 | KIF27        | 0.300 |
| 822 | STAT5B    | 0.011 | ZNF440    | 0.027 | CDK2AP2      | 0.008 | CCDC39   | 0.026 | NDNL2        | 0.300 |
| 823 | CROCC     | 0.011 | SLAMF1    | 0.027 | ARHGFE6      | 0.008 | CCR7     | 0.026 | HAAO         | 0.300 |
| 824 | FGD3      | 0.011 | FER1L4    | 0.027 | FCRL2        | 0.008 | BCL3     | 0.026 | ZNF420       | 0.300 |
| 825 | FCGRT     | 0.011 | GINS1     | 0.027 | RHBDD1       | 0.008 | BCAS4    | 0.026 | FLJ12334     | 0.300 |
| 826 | ELMO1     | 0.011 | ELOVL5    | 0.027 | PITHD1       | 0.008 | CEBPZ    | 0.026 | MLF2         | 0.300 |
| 827 | KTI12     | 0.011 | LAMTOR2   | 0.027 | SLC3A2       | 0.008 | TRIM4    | 0.026 | ZMI22        | 0.300 |
| 828 | LDB1      | 0.011 | CDC14B    | 0.027 | POLDIP2      | 0.008 | DNAJB14  | 0.026 | CTPS         | 0.300 |
| 829 | B4GALT4   | 0.011 | SFSWAP    | 0.027 | IFT57        | 0.008 | KIAA0776 | 0.026 | PIM2         | 0.300 |
| 830 | MARS      | 0.011 | LRRK2     | 0.027 | TBC1D5       | 0.008 | COPS8    | 0.026 | C9orf95      | 0.300 |
| 831 | ERP29     | 0.011 | CITED2    | 0.028 | CCR7         | 0.008 | CAPS     | 0.026 | C19orf2      | 0.300 |
| 832 | CXorf38   | 0.011 | FSIP2     | 0.028 | ESD          | 0.008 | ABHD13   | 0.026 | CDC48        | 0.300 |
| 833 | HLA-DPB1  | 0.011 | R3HCC1    | 0.028 | BIRC3        | 0.008 | ATG4B    | 0.026 | LILRA1       | 0.300 |
| 834 | CDK13     | 0.011 | SLCO5A1   | 0.028 | ZNF608       | 0.008 | TBC1D10C | 0.026 | COL19A1      | 0.300 |
| 835 | CR2       | 0.011 | C14orf147 | 0.028 | TIMM17A      | 0.008 | ZNF146   | 0.026 | APTX         | 0.300 |
| 836 | LOC541471 | 0.011 | CCDC17    | 0.028 | PRMT2        | 0.008 | MAP3K10  | 0.026 | PRDM10       | 0.300 |
| 837 | PIK3CG    | 0.011 | PSTPIP1   | 0.028 | SLC6A16      | 0.008 | PARP11   | 0.026 | TXNDC15      | 0.300 |
| 838 | ZC3H12B   | 0.011 | ZNF238    | 0.028 | RPLP0        | 0.008 | TELO2    | 0.026 | LOC100128881 | 0.301 |
| 839 | CCDC90A   | 0.011 | EARS2     | 0.028 | CUTA         | 0.008 | POLRMT   | 0.026 | ZNF286A      | 0.301 |
| 840 | YARS      | 0.011 | DTX3      | 0.028 | MBTPS2       | 0.008 | IDUA     | 0.026 | SLC26A2      | 0.301 |
| 841 | UFC1      | 0.011 | PAQR8     | 0.028 | NR2C2        | 0.008 | HTATSF1  | 0.026 | CD84         | 0.301 |
| 842 | FUT8      | 0.011 | EIF3I     | 0.028 | PABPC1L      | 0.008 | BTBD2    | 0.026 | ELP2         | 0.301 |



|     |           |       |           |       |              |       |            |       |              |       |
|-----|-----------|-------|-----------|-------|--------------|-------|------------|-------|--------------|-------|
| 843 | ARF6      | 0.011 | ZNF767    | 0.028 | SORL1        | 0.008 | GTPBP10    | 0.026 | NDUFA4       | 0.301 |
| 844 | HIST1H1C  | 0.011 | BLMH      | 0.028 | ZNF75A       | 0.008 | SLC10A3    | 0.027 | PHYHD1       | 0.301 |
| 845 | TNFRSF13C | 0.011 | RBM5      | 0.028 | BLCAP        | 0.008 | JMJD1C     | 0.027 | MTCP1        | 0.301 |
| 846 | CBFA2T3   | 0.011 | E2F8      | 0.028 | RFC1         | 0.008 | MATR3      | 0.027 | NME6         | 0.301 |
| 847 | LILRB4    | 0.011 | ITGB1     | 0.028 | DHDDS        | 0.009 | ANGEL2     | 0.027 | NLRP1        | 0.301 |
| 848 | CYTH3     | 0.011 | TIMM8B    | 0.028 | MARCKSL1     | 0.009 | SIRT6      | 0.027 | MYOF         | 0.301 |
| 849 | ZNF738    | 0.011 | FAM111A   | 0.028 | S1PR2        | 0.009 | PYCR1      | 0.027 | SLC41A2      | 0.303 |
| 850 | ACOX1     | 0.011 | LOC728407 | 0.028 | TXNDC5       | 0.009 | CTSZ       | 0.027 | SMAD7        | 0.304 |
| 851 | PIPF      | 0.011 | MRPL12    | 0.028 | GOLGA5       | 0.009 | FMR1       | 0.027 | ITIH4        | 0.304 |
| 852 | SNX29     | 0.011 | MTMR4     | 0.028 | UBE2R2       | 0.009 | MAN1A1     | 0.027 | NUP107       | 0.304 |
| 853 | AAK1      | 0.011 | C5orf41   | 0.028 | CYTH3        | 0.009 | STXBP2     | 0.027 | XKRX         | 0.304 |
| 854 | ERGIC2    | 0.011 | BAK1      | 0.028 | B3GNT9       | 0.009 | COX5B      | 0.027 | RIC3         | 0.304 |
| 855 | GGT7      | 0.011 | ECI1      | 0.028 | CALM1        | 0.009 | CCDC88B    | 0.027 | CBLB         | 0.304 |
| 856 | TPP1      | 0.011 | RNF146    | 0.028 | BCL7A        | 0.009 | EXOC6      | 0.027 | TUBA1B       | 0.304 |
| 857 | TARBP1    | 0.011 | HHEX      | 0.028 | C20orf24     | 0.009 | MOBKLB     | 0.027 | RPE          | 0.306 |
| 858 | RABAC1    | 0.011 | ZNF83     | 0.028 | LOC100294145 | 0.009 | PLA2G6     | 0.027 | FLJ35220     | 0.306 |
| 859 | ADM       | 0.012 | ZNF548    | 0.028 | ANG          | 0.009 | LOC221710  | 0.027 | PDIA6        | 0.306 |
| 860 | HLA-E     | 0.012 | KIF13B    | 0.028 | SIRT1        | 0.009 | ISG20      | 0.027 | MGEA5        | 0.306 |
| 861 | TXN       | 0.012 | SRRD      | 0.029 | ACADVL       | 0.009 | MBNL2      | 0.027 | GPRIN3       | 0.306 |
| 862 | SLC38A10  | 0.012 | RIC3      | 0.029 | MTDH         | 0.009 | TXNDC5     | 0.027 | C2orf3       | 0.306 |
| 863 | ZFP36L1   | 0.012 | POP7      | 0.029 | LPCAT4       | 0.009 | CDIPT      | 0.027 | UBL7         | 0.306 |
| 864 | GRINA     | 0.012 | FCGBP     | 0.029 | MAPK6        | 0.009 | HMGAI1     | 0.028 | MON1A        | 0.306 |
| 865 | DENND4B   | 0.012 | KIAA2018  | 0.029 | PSMB1        | 0.009 | PDCD4      | 0.028 | NR3C2        | 0.306 |
| 866 | SPOCK2    | 0.012 | PRMT1     | 0.029 | PIK3C2B      | 0.009 | ZMYM2      | 0.028 | BCL7C        | 0.306 |
| 867 | ME2       | 0.012 | ZNF485    | 0.029 | SAR1B        | 0.009 | ACBD5      | 0.028 | BST2         | 0.306 |
| 868 | RAB6A     | 0.012 | SEC23A    | 0.029 | HNRPDL       | 0.009 | NEK7       | 0.028 | SLC25A33     | 0.306 |
| 869 | MANBA     | 0.012 | ARID3B    | 0.029 | KIAA1737     | 0.009 | RFX7       | 0.028 | S100A11      | 0.306 |
| 870 | HNRPDL    | 0.012 | TAF1C     | 0.029 | MYO15B       | 0.009 | FAM190A    | 0.028 | ZDHHC2       | 0.306 |
| 871 | PPP2CA    | 0.012 | FOXRED1   | 0.029 | DAD1         | 0.009 | LYRM7      | 0.028 | GPRC5D       | 0.306 |
| 872 | PPP1R3B   | 0.012 | RG516     | 0.029 | SNX2         | 0.009 | ZNF687     | 0.028 | FAM83D       | 0.306 |
| 873 | UBAC2     | 0.012 | PSAT1     | 0.029 | ST8SIA4      | 0.009 | IGHA2      | 0.028 | SPAG16       | 0.306 |
| 874 | LZTFL1    | 0.012 | FAM84B    | 0.029 | COX7A2       | 0.009 | C1orf96    | 0.028 | SELRC1       | 0.306 |
| 875 | TRAF5     | 0.012 | LUC7L3    | 0.029 | SLC12A4      | 0.009 | CSNK1G2    | 0.028 | IBAS7        | 0.306 |
| 876 | BHLHA15   | 0.012 | PRRC2C    | 0.029 | GALNT14      | 0.009 | TLE2       | 0.028 | NKTR         | 0.306 |
| 877 | MRPS31    | 0.012 | CCR6      | 0.029 | ZBTB44       | 0.009 | ZNF777     | 0.028 | PHF19        | 0.306 |
| 878 | FLJ31306  | 0.012 | MRPL40    | 0.029 | GOLIM4       | 0.009 | FAM102B    | 0.028 | GNGT2        | 0.306 |
| 879 | ABHD15    | 0.012 | MEF2A     | 0.029 | VARS         | 0.009 | ZMAT3      | 0.028 | HK3          | 0.306 |
| 880 | EXOSC1    | 0.012 | DTX1      | 0.029 | CTH          | 0.009 | ABCD1      | 0.028 | DUSP5        | 0.307 |
| 881 | PRDX5     | 0.012 | ZWINT     | 0.029 | MANBA        | 0.009 | ZNF136     | 0.028 | RNF139       | 0.307 |
| 882 | CTSD      | 0.012 | PLEKHA1   | 0.029 | SNX22        | 0.009 | CDK18      | 0.028 | GBP4         | 0.307 |
| 883 | BCL2L1    | 0.012 | SCN3A     | 0.029 | EIF5B        | 0.009 | TFEC       | 0.028 | ITGA3        | 0.307 |
| 884 | ZNF600    | 0.012 | PSMB3     | 0.029 | CNR2         | 0.009 | PPIP5K2    | 0.028 | SPCS2        | 0.307 |
| 885 | PSMA5     | 0.012 | SMURF2    | 0.029 | RRP7A        | 0.009 | LENG9      | 0.028 | PNPLA7       | 0.307 |
| 886 | DENND3    | 0.012 | IER3IP1   | 0.029 | SCNN1B       | 0.009 | ICOSLG     | 0.028 | CACNA2D2     | 0.307 |
| 887 | COX19     | 0.012 | NDUFB10   | 0.029 | FOXRED1      | 0.009 | C11orf21   | 0.028 | CNP          | 0.308 |
| 888 | TMEM108   | 0.012 | DNAJA4    | 0.029 | WEE1         | 0.009 | NUPL1      | 0.028 | BAZ2B        | 0.308 |
| 889 | CPEB4     | 0.012 | ZNF302    | 0.029 | NU51         | 0.009 | GXYLT1     | 0.028 | FNDC3B       | 0.308 |
| 890 | MAPRE2    | 0.012 | C20orf24  | 0.030 | PLEKHG1      | 0.009 | ANK2       | 0.028 | TSHR         | 0.308 |
| 891 | MPEG1     | 0.012 | TTC39C    | 0.030 | MRPS33       | 0.009 | OPA1       | 0.028 | KRCC1        | 0.308 |
| 892 | MORC3     | 0.012 | LRRC37A2  | 0.030 | LMO7         | 0.009 | RRBP1      | 0.028 | NEAT1        | 0.309 |
| 893 | TMC8      | 0.012 | SNAP47    | 0.030 | CDC42SE1     | 0.009 | HLA-G      | 0.028 | SDF2L1       | 0.309 |
| 894 | NISCH     | 0.012 | ZMPSTE24  | 0.030 | HPRT1        | 0.009 | KLF16      | 0.029 | LRIG2        | 0.309 |
| 895 | C14orf43  | 0.012 | CHD1L     | 0.030 | ALOX5AP      | 0.009 | SDHD       | 0.029 | BIRC5        | 0.309 |
| 896 | PABPC1L   | 0.012 | RIMKLB    | 0.030 | MCEE         | 0.009 | MAN1A2     | 0.029 | RPL23AP64    | 0.309 |
| 897 | C15orf39  | 0.012 | TRAF1     | 0.030 | ATF2         | 0.009 | MACC1      | 0.029 | PAIP2B       | 0.310 |
| 898 | ZNF160    | 0.012 | ARHGAP18  | 0.030 | PLEKHF2      | 0.009 | CLIC4      | 0.029 | POLR2G       | 0.310 |
| 899 | ZFYVE27   | 0.012 | C2CD3     | 0.030 | PARP11       | 0.009 | SLC2A5     | 0.029 | ZNF678       | 0.310 |
| 900 | ENDOD1    | 0.012 | ERGIC1    | 0.030 | PSPH         | 0.009 | C1GALT1    | 0.029 | C21orf58     | 0.310 |
| 901 | PSMB2     | 0.012 | KCTD17    | 0.030 | ZNF91        | 0.009 | TMEM65     | 0.029 | VPREB3       | 0.310 |
| 902 | ITPKB     | 0.012 | PSMB1     | 0.030 | PSME1        | 0.009 | IFNAR1     | 0.029 | WFS1         | 0.310 |
| 903 | C2orf7    | 0.012 | SLC29A3   | 0.030 | KCTD2        | 0.009 | WDFY1      | 0.029 | LOC100507217 | 0.311 |
| 904 | GMEB2     | 0.012 | MORC4     | 0.030 | ITFG2        | 0.009 | CHCHD5     | 0.029 | HYLS1        | 0.311 |
| 905 | CRTAP     | 0.012 | PRR11     | 0.030 | ENDOD1       | 0.010 | USP45      | 0.029 | KCTD7        | 0.311 |
| 906 | TMED7     | 0.012 | EXOSC1    | 0.030 | TANC1        | 0.010 | NR1D2      | 0.029 | KCNC4        | 0.311 |
| 907 | FBXO44    | 0.012 | ZNF76     | 0.030 | SH3BP2       | 0.010 | CACNA2D2   | 0.029 | RNF145       | 0.312 |
| 908 | NDUFS2    | 0.012 | ERAP2     | 0.030 | ATP5A1       | 0.010 | KLHL24     | 0.029 | ZNF711       | 0.312 |
| 909 | RRM2B     | 0.012 | MYL6B     | 0.030 | ABC6B        | 0.010 | PVRIG      | 0.029 | IAH1         | 0.313 |
| 910 | ABLIM1    | 0.012 | IQGAP2    | 0.030 | SLC25A30     | 0.010 | C16orf86   | 0.029 | B4GALT3      | 0.313 |
| 911 | KEAP1     | 0.012 | C12orf75  | 0.030 | NR3C2        | 0.010 | HNRNPA3    | 0.029 | SESN1        | 0.313 |
| 912 | PRKI      | 0.012 | RPS27L    | 0.031 | USP12        | 0.010 | GADD45GIP1 | 0.029 | DICER1       | 0.313 |
| 913 | CDCA7L    | 0.012 | DPP3      | 0.031 | SPINT2       | 0.010 | SSR1       | 0.029 | FOSB         | 0.313 |
| 914 | TMEM50A   | 0.012 | FAM129C   | 0.031 | METTL7A      | 0.010 | CCDC58     | 0.029 | CLECL1       | 0.313 |
| 915 | EIF2AK3   | 0.012 | KIAA0141  | 0.031 | SPRED1       | 0.010 | SRP54      | 0.029 | LOC220906    | 0.314 |
| 916 | VAV2      | 0.012 | MRPS2     | 0.031 | CYP51A1      | 0.010 | FAM193B    | 0.029 | RASSF4       | 0.314 |
| 917 | ARL13B    | 0.012 | AGPAT3    | 0.031 | ZNF664       | 0.010 | MESDC1     | 0.029 | ZBTB43       | 0.314 |
| 918 | RPL13     | 0.012 | BACH2     | 0.031 | LOC151162    | 0.010 | TOR1AIP1   | 0.029 | BRCA2        | 0.314 |
| 919 | ANKRD10   | 0.012 | RALY      | 0.031 | TSPAN33      | 0.010 | UBE4A      | 0.029 | GLDC         | 0.314 |
| 920 | PLCB2     | 0.012 | DDX1      | 0.031 | MNT          | 0.010 | PPP6R1     | 0.029 | LOC100129726 | 0.314 |

|     |           |       |           |       |            |       |          |       |               |       |
|-----|-----------|-------|-----------|-------|------------|-------|----------|-------|---------------|-------|
| 921 | EXOC2     | 0.012 | PCF11     | 0.031 | C17orf79   | 0.010 | RHOG     | 0.029 | CFLAR         | 0.314 |
| 922 | ZNF215    | 0.012 | COL9A2    | 0.031 | CEP110     | 0.010 | PIP5K1C  | 0.029 | DKFZP68615217 | 0.314 |
| 923 | PPP1R13B  | 0.012 | ZNF154    | 0.031 | RASGRP2    | 0.010 | CEP70    | 0.029 | COX16         | 0.314 |
| 924 | KCNA2     | 0.012 | PSMD1     | 0.031 | ERP29      | 0.010 | IFNGR1   | 0.029 | ATF5          | 0.314 |
| 925 | TTC24     | 0.012 | KCNIP2    | 0.031 | ZNF160     | 0.010 | GDAP1    | 0.029 | CEACAM21      | 0.314 |
| 926 | LYSMD2    | 0.012 | DYNC1LI2  | 0.031 | GLDC       | 0.010 | SPI1     | 0.029 | CLTB          | 0.314 |
| 927 | KIAA1147  | 0.012 | PLXNA3    | 0.031 | HCST       | 0.010 | MAST2    | 0.029 | PDXDC2P       | 0.314 |
| 928 | VPREB3    | 0.012 | TMED7     | 0.031 | PRDM2      | 0.010 | MIB2     | 0.029 | ZNF529        | 0.314 |
| 929 | HLA-DRB1  | 0.012 | ANAPC11   | 0.031 | CD19       | 0.010 | ZNF23    | 0.030 | IKBIP         | 0.314 |
| 930 | SH2D3C    | 0.012 | UQCRC2    | 0.032 | CHAC2      | 0.010 | MOSPD2   | 0.030 | PGP           | 0.314 |
| 931 | CYTH1     | 0.012 | RPL36AL   | 0.032 | RAB3IP     | 0.010 | H1FX     | 0.030 | TMEM182       | 0.315 |
| 932 | DHODH     | 0.012 | LOC389641 | 0.032 | TFG        | 0.010 | FBR3     | 0.030 | LOC652276     | 0.315 |
| 933 | CD19      | 0.012 | CCDC56    | 0.032 | DOPEY2     | 0.010 | CNFN     | 0.030 | PRDX4         | 0.315 |
| 934 | CLN6      | 0.012 | FAM177A1  | 0.032 | FAM98A     | 0.010 | RANBP3   | 0.030 | CFP           | 0.315 |
| 935 | KLHL3     | 0.012 | OSBP2     | 0.032 | ASB1       | 0.010 | ZNF444   | 0.030 | AIF1          | 0.315 |
| 936 | TOP1      | 0.012 | MYBL2     | 0.032 | LAMP3      | 0.010 | ATP13A2  | 0.030 | OTUD6B        | 0.315 |
| 937 | BCL9L     | 0.012 | GSPT1     | 0.032 | CENPK      | 0.010 | ARHGEF18 | 0.030 | DIEXF         | 0.315 |
| 938 | ARL5A     | 0.012 | SFRS18    | 0.032 | NCRNA00094 | 0.010 | CHPF     | 0.030 | SEC24A        | 0.315 |
| 939 | SWAP70    | 0.012 | ATF4      | 0.032 | JTB        | 0.010 | CCNT2    | 0.030 | TROAP         | 0.315 |
| 940 | CBL       | 0.012 | FH        | 0.032 | CR1        | 0.010 | RNF146   | 0.030 | RCN1          | 0.315 |
| 941 | YWHAG     | 0.012 | ZFP62     | 0.032 | TPD52      | 0.010 | PIIB     | 0.030 | LDHA          | 0.315 |
| 942 | TTC9      | 0.012 | CLPB      | 0.032 | HCL51      | 0.010 | ARL6IP1  | 0.030 | LOC678655     | 0.315 |
| 943 | SYNGR2    | 0.012 | HLA-DRA   | 0.032 | TCEB2      | 0.010 | STAM2    | 0.030 | PLEKHA4       | 0.315 |
| 944 | USMG5     | 0.012 | PCMTD2    | 0.032 | PLEKHA2    | 0.010 | FCHO1    | 0.030 | UBE2M         | 0.316 |
| 945 | YWHAE     | 0.012 | LGALS9    | 0.032 | SLC7A1     | 0.010 | CNOT7    | 0.030 | C17orf58      | 0.316 |
| 946 | HVCN1     | 0.012 | ETFB      | 0.032 | HMB5       | 0.010 | MED13    | 0.030 | MMRN1         | 0.316 |
| 947 | APBB1     | 0.012 | NKIRAS2   | 0.032 | ITPKB      | 0.010 | C10orf46 | 0.030 | SEC11C        | 0.316 |
| 948 | TNFRSF1B  | 0.012 | ENDOD1    | 0.032 | ZNF675     | 0.010 | HERC4    | 0.030 | WDR62         | 0.316 |
| 949 | TMEM203   | 0.012 | HLA-DMA   | 0.032 | TIA1       | 0.010 | C6orf170 | 0.030 | VDR           | 0.316 |
| 950 | P4HB      | 0.012 | TIMM17A   | 0.032 | C22orf23   | 0.010 | ZC3H3    | 0.030 | HYOU1         | 0.317 |
| 951 | PPDPF     | 0.012 | ADAM23    | 0.033 | ADRBK2     | 0.010 | ZNF524   | 0.030 | MLEC          | 0.318 |
| 952 | RUNDC2C   | 0.012 | NDUFA6    | 0.033 | RRAGB      | 0.010 | IFT88    | 0.030 | SEPSECS       | 0.318 |
| 953 | TNRC18    | 0.012 | MRPS22    | 0.033 | KIAA0776   | 0.010 | SELS     | 0.030 | PASK          | 0.318 |
| 954 | UQCRH     | 0.012 | PSMA4     | 0.033 | RASSF6     | 0.010 | DGKE     | 0.030 | ARHGAP12      | 0.318 |
| 955 | TNIP2     | 0.012 | TXNL4A    | 0.033 | LDLR       | 0.010 | ARHGFE17 | 0.030 | NFAT5         | 0.318 |
| 956 | CHPF      | 0.012 | POLDIP2   | 0.033 | TSHR       | 0.010 | NADSYN1  | 0.030 | ZIK1          | 0.318 |
| 957 | ZBTB4     | 0.012 | POLM      | 0.033 | QSOX2      | 0.011 | UBR1     | 0.030 | SDHAP3        | 0.318 |
| 958 | SMAD3     | 0.012 | MRPL53    | 0.033 | DNASE2     | 0.011 | C11orf83 | 0.030 | GPX7          | 0.318 |
| 959 | COX6A1    | 0.012 | ARRDC2    | 0.033 | NDST2      | 0.011 | CCT6B    | 0.030 | INO80D        | 0.319 |
| 960 | CDC14B    | 0.012 | SEPN1     | 0.033 | SORBS3     | 0.011 | NUDT3    | 0.030 | DMXL1         | 0.319 |
| 961 | GLT25D1   | 0.012 | GPKOW     | 0.033 | C17orf48   | 0.011 | SDAD1    | 0.030 | TRIM33        | 0.319 |
| 962 | ARNTL2    | 0.012 | FAM190A   | 0.033 | HSD17B8    | 0.011 | PHF6     | 0.030 | CCNB1         | 0.319 |
| 963 | R3HDM2    | 0.012 | BCAP31    | 0.033 | C8orf37    | 0.011 | CHURC1   | 0.030 | HEATR1        | 0.319 |
| 964 | ANXA5     | 0.012 | AURKAIP1  | 0.033 | PSMB4      | 0.011 | SNRPB    | 0.030 | ZKSCAN1       | 0.319 |
| 965 | WDTC1     | 0.012 | ZNF783    | 0.033 | C1orf162   | 0.011 | SHARPIN  | 0.030 | COX6C         | 0.319 |
| 966 | RELB      | 0.012 | IKBKB     | 0.033 | OSBP11     | 0.011 | C7orf43  | 0.030 | COL24A1       | 0.320 |
| 967 | FLJ10038  | 0.012 | FCHSD2    | 0.033 | CHAC1      | 0.011 | ETFB     | 0.030 | TRIM56        | 0.320 |
| 968 | FAM193A   | 0.012 | PAN3      | 0.033 | SLC16A6    | 0.011 | ZNF282   | 0.030 | GABBR1        | 0.321 |
| 969 | MRPS14    | 0.012 | TROAP     | 0.033 | RAB11FIP4  | 0.011 | EFHD2    | 0.030 | LOC202181     | 0.321 |
| 970 | FAM98A    | 0.012 | AP1S3     | 0.033 | KMO        | 0.011 | ZNF175   | 0.030 | MXRA8         | 0.322 |
| 971 | TMEM104   | 0.012 | BEND4     | 0.033 | CGGBP1     | 0.011 | PIN1     | 0.030 | ZNF516        | 0.322 |
| 972 | TMUB2     | 0.012 | PDE7A     | 0.033 | SNX30      | 0.011 | MAN2B1   | 0.030 | CLSPN         | 0.323 |
| 973 | SH2B1     | 0.012 | ZC3H12A   | 0.033 | RAB34      | 0.011 | MINK1    | 0.030 | MFHAS1        | 0.323 |
| 974 | ARAP1     | 0.012 | SLC10A7   | 0.033 | RWDD2A     | 0.011 | FAM73A   | 0.030 | RALGAPA1      | 0.323 |
| 975 | CXCL16    | 0.012 | TRMT61B   | 0.033 | CD84       | 0.011 | SSR4     | 0.030 | GAS6          | 0.323 |
| 976 | ZNF83     | 0.012 | PITPNM1   | 0.033 | MYO1F      | 0.011 | ZNF273   | 0.030 | EMR2          | 0.323 |
| 977 | LSM1      | 0.012 | ASB1      | 0.033 | ZCCHC2     | 0.011 | HIAT1    | 0.030 | POLI          | 0.324 |
| 978 | ZCCHC6    | 0.012 | MAP7D1    | 0.033 | SAMD9L     | 0.011 | HMG2     | 0.030 | C10orf105     | 0.324 |
| 979 | ZNF274    | 0.012 | PRKAG1    | 0.033 | CPEB4      | 0.011 | C1orf9   | 0.030 | MRPS25        | 0.324 |
| 980 | TNFRSF10B | 0.012 | SIX5      | 0.033 | TCL1A      | 0.011 | SBNO2    | 0.030 | CR1           | 0.324 |
| 981 | HBS1L     | 0.012 | ZNF33B    | 0.033 | GNB5       | 0.011 | RIN3     | 0.030 | KIF18B        | 0.324 |
| 982 | PPP6R1    | 0.012 | ANKFY1    | 0.033 | GMPS       | 0.011 | NAA35    | 0.030 | TTC32         | 0.324 |
| 983 | ARHGFE7   | 0.012 | DYNLL1    | 0.033 | GOLGB1     | 0.011 | C6orf62  | 0.030 | PPP1R15A      | 0.324 |
| 984 | ZNF266    | 0.012 | DIEXF     | 0.033 | IKZF1      | 0.011 | TMEM64   | 0.031 | ANKRD36B      | 0.324 |
| 985 | CDKN2D    | 0.012 | YARS      | 0.033 | PRRC1      | 0.011 | C7orf58  | 0.031 | ERP44         | 0.324 |
| 986 | CSNK1D    | 0.012 | SLC2A5    | 0.034 | IRF7       | 0.011 | SNAPC1   | 0.031 | LILRA3        | 0.324 |
| 987 | C5orf33   | 0.012 | PAX5      | 0.034 | SDR42E1    | 0.011 | ZNHIT6   | 0.031 | LRRC25        | 0.324 |
| 988 | RC3H1     | 0.012 | TCERG1    | 0.034 | TCN2       | 0.011 | ATP2A2   | 0.031 | LILRA2        | 0.324 |
| 989 | SLC15A3   | 0.012 | EIF3J     | 0.034 | WDR41      | 0.011 | TYW3     | 0.031 | SH3RF1        | 0.324 |
| 990 | GANAB     | 0.012 | PRMT5     | 0.034 | ANAPC5     | 0.011 | KLHDC4   | 0.031 | RPL22         | 0.324 |
| 991 | SGSM2     | 0.012 | TRPC1     | 0.034 | SCYL1      | 0.011 | GUF1     | 0.031 | C12orf47      | 0.324 |
| 992 | SEMA4B    | 0.012 | TYMS      | 0.034 | ZNF498     | 0.011 | MAP4K5   | 0.031 | LOC619207     | 0.324 |
| 993 | DLD       | 0.012 | COX8A     | 0.034 | ZSCAN29    | 0.011 | TKT      | 0.031 | TPI1          | 0.324 |
| 994 | SIPA1L3   | 0.012 | C18orf10  | 0.034 | RAB31      | 0.011 | SCARB2   | 0.031 | MGAT4A        | 0.325 |
| 995 | RPL39     | 0.012 | WASF1     | 0.034 | PCID2      | 0.011 | FER      | 0.031 | LOC400958     | 0.325 |
| 996 | DAB2IP    | 0.012 | PINK1     | 0.034 | PBX2       | 0.011 | RAPGEF1  | 0.031 | ESCO2         | 0.325 |
| 997 | ANKFY1    | 0.012 | CRYZL1    | 0.034 | USP25      | 0.011 | CDC40    | 0.031 | PSMB1         | 0.325 |
| 998 | MYL6B     | 0.012 | MRPS33    | 0.034 | WSB1       | 0.011 | ZNF512B  | 0.031 | MTR           | 0.325 |

|      |          |       |              |       |           |       |           |       |           |       |
|------|----------|-------|--------------|-------|-----------|-------|-----------|-------|-----------|-------|
| 999  | MSTO1    | 0.012 | GABBR1       | 0.034 | NDUFA1    | 0.011 | ENDOD1    | 0.031 | CCNF      | 0.325 |
| 1000 | MAP3K4   | 0.012 | KEAP1        | 0.034 | ATXN7     | 0.011 | CRTC1     | 0.031 | RASGEF1A  | 0.325 |
| 1001 | FADS3    | 0.012 | PLAGL1       | 0.035 | GDF11     | 0.011 | CDAN1     | 0.031 | ANGPTL6   | 0.325 |
| 1002 | TMEM175  | 0.012 | ATHL1        | 0.035 | TRPV3     | 0.011 | CALU      | 0.031 | HTT       | 0.325 |
| 1003 | LTA4H    | 0.012 | MPG          | 0.035 | IBTK      | 0.011 | TRAPPC6A  | 0.031 | DCUN1D3   | 0.325 |
| 1004 | ATF6     | 0.012 | DAP          | 0.035 | TRIO      | 0.011 | OGFRL1    | 0.032 | FLJ45340  | 0.325 |
| 1005 | CHCHD2   | 0.012 | METTL11A     | 0.035 | CD5       | 0.011 | ZNF493    | 0.032 | GLCCI1    | 0.325 |
| 1006 | HLA-DQB1 | 0.012 | MRPL51       | 0.035 | KIAA0754  | 0.011 | TCIRG1    | 0.032 | DYNLT3    | 0.325 |
| 1007 | HDAC5    | 0.012 | GLIPR1       | 0.035 | TREML2    | 0.011 | ZNF480    | 0.032 | C8orf38   | 0.325 |
| 1008 | AES      | 0.013 | C13orf15     | 0.035 | CHMP7     | 0.011 | UNK       | 0.032 | PFKFB2    | 0.325 |
| 1009 | BEX4     | 0.013 | SNF8         | 0.035 | SACS      | 0.011 | PLCH2     | 0.032 | ANKRD37   | 0.325 |
| 1010 | SLC25A23 | 0.013 | SMAD4        | 0.035 | SLC35A2   | 0.011 | ATM       | 0.032 | 41524.000 | 0.325 |
| 1011 | JRKL     | 0.013 | MIR155HG     | 0.035 | GGT7      | 0.012 | KLHL28    | 0.032 | AHNAK2    | 0.325 |
| 1012 | MADD     | 0.013 | BBS9         | 0.035 | GVINP1    | 0.012 | FRA10AC1  | 0.032 | WHSC11    | 0.325 |
| 1013 | MAGI3    | 0.013 | JSRP1        | 0.035 | UQCRC1    | 0.012 | MAPK3     | 0.032 | SGK196    | 0.325 |
| 1014 | C1orf43  | 0.013 | FICD         | 0.035 | COX6B1    | 0.012 | GTF2A2    | 0.032 | MAGEF1    | 0.325 |
| 1015 | ILF2     | 0.013 | DENND4B      | 0.035 | LOXL2     | 0.012 | SPOCK2    | 0.032 | CLOCK     | 0.325 |
| 1016 | OST4     | 0.013 | SAMD4A       | 0.035 | BAG1      | 0.012 | LOC389333 | 0.032 | SNAPC3    | 0.325 |
| 1017 | SEC11A   | 0.013 | JAK3         | 0.035 | COMMD3    | 0.012 | UBE2J1    | 0.032 | PRR7      | 0.325 |
| 1018 | KIAA1797 | 0.013 | ZNF260       | 0.035 | MPP7      | 0.012 | KPNA3     | 0.032 | TPST2     | 0.325 |
| 1019 | FBRS     | 0.013 | LOC100506710 | 0.035 | CHML      | 0.012 | SLC25A36  | 0.032 | LENG8     | 0.325 |
| 1020 | C17orf96 | 0.013 | ZBED5        | 0.035 | STAT6     | 0.012 | LRRC56    | 0.032 | CAPRN2    | 0.325 |
| 1021 | TIMM23   | 0.013 | TMED8        | 0.035 | MTX1      | 0.012 | SBF1      | 0.032 | FKBP11    | 0.325 |
| 1022 | TAF15    | 0.013 | IGLL1        | 0.035 | HLA-DQA   | 0.012 | CYorf15B  | 0.032 | VSIG1     | 0.325 |
| 1023 | XPC      | 0.013 | DECR1        | 0.035 | FLR1A     | 0.012 | SAR1A     | 0.032 | CCND2     | 0.325 |
| 1024 | PIP4K2B  | 0.013 | C17orf91     | 0.036 | HLA-DQB1  | 0.012 | ADCK4     | 0.032 | MON1B     | 0.325 |
| 1025 | SMARCC2  | 0.013 | GSTZ1        | 0.036 | ABC88     | 0.012 | TIMM17A   | 0.032 | PRKAA1    | 0.325 |
| 1026 | RUNX3    | 0.013 | CD83         | 0.036 | RPS19BP1  | 0.012 | ZNF238    | 0.032 | TRIM24    | 0.325 |
| 1027 | CAMK2G   | 0.013 | PIKFYVE      | 0.036 | FDP5      | 0.012 | GLS       | 0.032 | TAC3      | 0.325 |
| 1028 | NGRN     | 0.013 | TMEM126A     | 0.036 | DFFB      | 0.012 | PPPDE1    | 0.032 | FSCN1     | 0.325 |
| 1029 | C9orf7   | 0.013 | SPC25        | 0.036 | CCDC76    | 0.012 | RASGRP3   | 0.032 | GUSBP4    | 0.325 |
| 1030 | EIF3J    | 0.013 | FAM21C       | 0.036 | NDUFV3    | 0.012 | GAS8      | 0.032 | DNAB11    | 0.325 |
| 1031 | FAM60A   | 0.013 | FAM96B       | 0.036 | BLVRA     | 0.012 | FAM117B   | 0.032 | MCART1    | 0.325 |
| 1032 | SERTAD2  | 0.013 | TAGLN        | 0.036 | SCAF4     | 0.012 | C6orf1    | 0.032 | MAMDC4    | 0.325 |
| 1033 | EIF2AK4  | 0.013 | AEBP1        | 0.036 | SLC30A6   | 0.012 | TRAF1     | 0.032 | AIM1      | 0.325 |
| 1034 | MANF     | 0.013 | POLR2F       | 0.036 | CHMP2A    | 0.012 | FGD3      | 0.033 | ACBD5     | 0.325 |
| 1035 | RASD1    | 0.013 | C6orf136     | 0.036 | NDUF8     | 0.012 | UAP1      | 0.033 | PDCD7     | 0.325 |
| 1036 | MAPK6    | 0.013 | UCHL5        | 0.036 | ZBTB24    | 0.012 | NDUFA13   | 0.033 | HIVEP3    | 0.325 |
| 1037 | MYADM    | 0.013 | ADRBK2       | 0.036 | JAZF1     | 0.012 | C7orf26   | 0.033 | FANCC     | 0.325 |
| 1038 | SP110    | 0.013 | SEC11A       | 0.036 | MED13L    | 0.012 | ELK1      | 0.033 | TLR8      | 0.325 |
| 1039 | RNF11    | 0.013 | CCDC117      | 0.036 | CHRNB1    | 0.012 | GTF3C3    | 0.033 | PREB      | 0.325 |
| 1040 | PLIN2    | 0.013 | UNC13B       | 0.036 | ATXN2L    | 0.012 | C9orf69   | 0.033 | TRAPPC6B  | 0.325 |
| 1041 | KIAA0355 | 0.013 | SNORA61      | 0.036 | CNPY2     | 0.012 | C19orf6   | 0.033 | ATF7IP2   | 0.325 |
| 1042 | NES      | 0.013 | SLC35C1      | 0.036 | JUP       | 0.012 | APBB1     | 0.033 | SCML4     | 0.325 |
| 1043 | GOSR2    | 0.013 | TRAK1        | 0.036 | TNFRSF11A | 0.012 | COG5      | 0.033 | TSPYL1    | 0.325 |
| 1044 | SERINC3  | 0.013 | MSL3         | 0.036 | KIFAP3    | 0.012 | LSR       | 0.033 | ZKDB      | 0.325 |
| 1045 | POFUT2   | 0.013 | SHCBP1       | 0.036 | ZP3       | 0.012 | RPP30     | 0.033 | SLC27A5   | 0.325 |
| 1046 | DDX60L   | 0.013 | ATP5C1       | 0.036 | XRRA1     | 0.012 | KTN1      | 0.033 | NLRX1     | 0.325 |
| 1047 | SLC25A38 | 0.013 | HERC4        | 0.036 | CYBB      | 0.012 | SLC25A29  | 0.033 | TMEM141   | 0.325 |
| 1048 | VDAC1    | 0.013 | IL2RA        | 0.036 | NFATC3    | 0.012 | MEGF9     | 0.033 | TPR       | 0.325 |
| 1049 | ZNF354B  | 0.013 | BET1L        | 0.036 | ABC89     | 0.012 | TMEM87B   | 0.033 | EGR1      | 0.325 |
| 1050 | TMEM208  | 0.013 | C1orf63      | 0.036 | TK2       | 0.012 | SREBF2    | 0.033 | TFR2      | 0.325 |
| 1051 | MCC      | 0.013 | NDUFA2       | 0.036 | ENTPD4    | 0.012 | ABI1      | 0.033 | ABHD3     | 0.325 |
| 1052 | ZNF646   | 0.013 | GOT1         | 0.036 | HLA-DPA1  | 0.012 | RELA      | 0.033 | ANUBL1    | 0.326 |
| 1053 | CHP      | 0.013 | MPST         | 0.037 | UBE3B     | 0.012 | IL6ST     | 0.033 | EEA1      | 0.326 |
| 1054 | APPL1    | 0.013 | FAM120C      | 0.037 | CLEC17A   | 0.012 | FBXL12    | 0.033 |           |       |
| 1055 | SGPL1    | 0.013 | POU2F2       | 0.037 | KEAP1     | 0.012 | SMC3      | 0.033 |           |       |
| 1056 | TRAPPC10 | 0.013 | PPP1CA       | 0.037 | RPS6KB2   | 0.013 | RBM47     | 0.033 |           |       |
| 1057 | CCDC47   | 0.013 | CCDC76       | 0.037 | SLC35A5   | 0.013 | ROCK1     | 0.033 |           |       |
| 1058 | GABBR1   | 0.013 | YIPF6        | 0.037 | BCAP29    | 0.013 | EEA1      | 0.033 |           |       |
| 1059 | CEBPZ    | 0.013 | TST          | 0.037 | MSL1      | 0.013 | NUDT1     | 0.033 |           |       |
| 1060 | ALOX5    | 0.013 | ST7          | 0.037 | GLT8D1    | 0.013 | KCTD13    | 0.033 |           |       |
| 1061 | PTPN6    | 0.013 | FDX1         | 0.037 | HVCN1     | 0.013 | PSMA5     | 0.033 |           |       |
| 1062 | MZF1     | 0.013 | SRSF9        | 0.037 | ANKRD28   | 0.013 | KYNU      | 0.033 |           |       |
| 1063 | PRDX2    | 0.013 | BAG1         | 0.037 | CERCAM    | 0.013 | MRPS31    | 0.033 |           |       |
| 1064 | MEGF6    | 0.013 | ZCCHC7       | 0.037 | TIMM23    | 0.013 | METTL7A   | 0.033 |           |       |
| 1065 | SEC24C   | 0.013 | ZNF391       | 0.037 | IRF4      | 0.013 | LYRM5     | 0.033 |           |       |
| 1066 | PCMTD2   | 0.013 | MARCKSL1     | 0.037 | MRPL28    | 0.013 | PKD1      | 0.033 |           |       |
| 1067 | RPS6KA1  | 0.013 | TMEM179B     | 0.037 | PSME2     | 0.013 | GGPS1     | 0.033 |           |       |
| 1068 | YKT6     | 0.013 | AASS         | 0.037 | GPRASP1   | 0.013 | PKN2      | 0.033 |           |       |
| 1069 | QTRTD1   | 0.013 | ATPIF1       | 0.037 | CCDC69    | 0.013 | MCL1      | 0.033 |           |       |
| 1070 | CDC42SE1 | 0.013 | MTMR9        | 0.037 | TMEM165   | 0.013 | FBXL3     | 0.033 |           |       |
| 1071 | EIF2S1   | 0.013 | CHAF1B       | 0.038 | TWISTNB   | 0.013 | PKD1P1    | 0.033 |           |       |
| 1072 | NFKB2    | 0.013 | PHLPP1       | 0.038 | PPFIBP2   | 0.013 | GSTP1     | 0.033 |           |       |
| 1073 | IL6ST    | 0.013 | CCR10        | 0.038 | SEC24C    | 0.013 | APPBP2    | 0.033 |           |       |
| 1074 | TBC1D10A | 0.013 | GGA1         | 0.038 | DENND5A   | 0.013 | POLK      | 0.033 |           |       |
| 1075 | WDR45    | 0.013 | TAF4         | 0.038 | ZNF493    | 0.013 | NAA16     | 0.033 |           |       |
| 1076 | ARHGAP18 | 0.013 | SLC7A1       | 0.038 | EFEMP2    | 0.013 | RASAL3    | 0.034 |           |       |

|      |           |       |              |       |           |       |              |       |
|------|-----------|-------|--------------|-------|-----------|-------|--------------|-------|
| 1077 | C12orf11  | 0.013 | MAPRE1       | 0.038 | DCK       | 0.013 | BRF1         | 0.034 |
| 1078 | DNAJC7    | 0.013 | SPATA6       | 0.038 | CHL1      | 0.013 | C16orf72     | 0.034 |
| 1079 | STX7      | 0.013 | TUBG1        | 0.038 | MGLL      | 0.013 | LOC100506710 | 0.034 |
| 1080 | RNAS22    | 0.013 | ALOX5        | 0.038 | PLCB2     | 0.013 | GNAI3        | 0.034 |
| 1081 | LOC92249  | 0.013 | TRIO         | 0.038 | CLIC4     | 0.013 | KDELR2       | 0.034 |
| 1082 | AKR1A1    | 0.013 | ZBTB24       | 0.038 | PATZ1     | 0.013 | ARHGAP39     | 0.034 |
| 1083 | MAN2B1    | 0.013 | C5orf33      | 0.038 | ARL16     | 0.013 | KPNA4        | 0.034 |
| 1084 | NR2C2     | 0.013 | DSTN         | 0.038 | KIF13B    | 0.013 | ATP6V0E2     | 0.034 |
| 1085 | ZNF275    | 0.013 | MAP2K6       | 0.038 | BEX4      | 0.013 | ATAD1        | 0.034 |
| 1086 | MBP       | 0.013 | HMBS         | 0.038 | MAP4K3    | 0.013 | TMEM5        | 0.034 |
| 1087 | LFNG      | 0.013 | CDCA7L       | 0.038 | ZNF790    | 0.013 | C11orf24     | 0.034 |
| 1088 | FICD      | 0.013 | RGL2         | 0.038 | D2HGDH    | 0.013 | RFNG         | 0.034 |
| 1089 | PIK3CD    | 0.013 | GTF2A1       | 0.038 | HSF4      | 0.013 | KIAA1731     | 0.034 |
| 1090 | SFSWAP    | 0.013 | NEURL4       | 0.038 | CDC42BPB  | 0.013 | R3HCC1       | 0.034 |
| 1091 | TP53111   | 0.013 | CDC25A       | 0.038 | TFEB      | 0.013 | FAM172A      | 0.034 |
| 1092 | SFXN4     | 0.013 | BUB1         | 0.038 | ARHGEF1   | 0.013 | ARAP2        | 0.034 |
| 1093 | AKR1B1    | 0.013 | PLXNA1       | 0.038 | IER3IP1   | 0.013 | MED16        | 0.034 |
| 1094 | CMIP      | 0.013 | SLC3A2       | 0.038 | WDFY4     | 0.013 | DENND5B      | 0.034 |
| 1095 | MTMR10    | 0.013 | MANBA        | 0.038 | NAA25     | 0.013 | RBAN         | 0.034 |
| 1096 | KLF11     | 0.013 | ZNF589       | 0.038 | EMB       | 0.013 | NUP205       | 0.034 |
| 1097 | GMPPB     | 0.013 | KIAA0430     | 0.038 | PHPT1     | 0.013 | POLR2A       | 0.034 |
| 1098 | ARSB      | 0.013 | MCEE         | 0.038 | IRAK3     | 0.013 | CLIP1        | 0.034 |
| 1099 | PSMD8     | 0.013 | ALG9         | 0.038 | DUSP18    | 0.013 | BLVRB        | 0.034 |
| 1100 | ZNF84     | 0.013 | IFI35        | 0.039 | C7orf29   | 0.013 | DECR2        | 0.034 |
| 1101 | PLAGL1    | 0.013 | LCN10        | 0.039 | ST6GAL1   | 0.013 | HLA-L        | 0.034 |
| 1102 | CYBASC3   | 0.013 | PTK2         | 0.039 | NDUFB7    | 0.013 | ZC3H7B       | 0.034 |
| 1103 | FNTA      | 0.013 | NCRNA00201   | 0.039 | RASAL2    | 0.013 | ZNF267       | 0.034 |
| 1104 | FAM65B    | 0.013 | TMEM70       | 0.039 | PUM1      | 0.013 | 41340.000    | 0.034 |
| 1105 | DPP3      | 0.013 | TMEM85       | 0.039 | MRPS25    | 0.013 | XRCC1        | 0.034 |
| 1106 | HSD17B12  | 0.013 | HEXIM2       | 0.039 | HERC2P2   | 0.013 | SCAND1       | 0.034 |
| 1107 | PMS1      | 0.013 | ZNF506       | 0.039 | AKR1A1    | 0.013 | SYTL1        | 0.034 |
| 1108 | ARID4A    | 0.013 | MRPL20       | 0.039 | ZNF845    | 0.013 | SPTY2D1      | 0.034 |
| 1109 | CKAP2     | 0.013 | SLC2A4RG     | 0.039 | POU2F2    | 0.013 | TTC14        | 0.034 |
| 1110 | LTBP4     | 0.013 | C2orf47      | 0.039 | TMEM71    | 0.013 | PRR12        | 0.034 |
| 1111 | PBRM1     | 0.013 | MYH3         | 0.039 | YIF1B     | 0.013 | ATN1         | 0.034 |
| 1112 | SLC39A8   | 0.013 | EPB41L4A     | 0.039 | IL7       | 0.014 | TMEM175      | 0.034 |
| 1113 | SLC16A1   | 0.013 | LOC100128252 | 0.039 | ZNF200    | 0.014 | ESCO1        | 0.034 |
| 1114 | CRADD     | 0.013 | TEX10        | 0.039 | NUP160    | 0.014 | CCNYL1       | 0.034 |
| 1115 | CNNM4     | 0.013 | PHF15        | 0.039 | 41334.000 | 0.014 | POC5         | 0.034 |
| 1116 | TNFRSF13B | 0.013 | YIPF2        | 0.039 | LRRC27    | 0.014 | HEATR7A      | 0.034 |
| 1117 | ZNF12     | 0.013 | SMPD3        | 0.039 | SERF2     | 0.014 | ROMO1        | 0.034 |
| 1118 | RASSF2    | 0.013 | SIVA1        | 0.039 | LY86      | 0.014 | LOC647979    | 0.034 |
| 1119 | NOTCH2    | 0.013 | ZNF558       | 0.039 | PGRMC2    | 0.014 | VPS35        | 0.034 |
| 1120 | PAPOLA    | 0.013 | ITPR1        | 0.039 | ZNF865    | 0.014 | TTYH3        | 0.034 |
| 1121 | MRPL14    | 0.013 | C14orf182    | 0.039 | SAR1A     | 0.014 | OSBPL8       | 0.034 |
| 1122 | SNRK      | 0.013 | FBXL8        | 0.039 | MX1       | 0.014 | MPI          | 0.034 |
| 1123 | AEBP1     | 0.013 | RUFY2        | 0.039 | COX5A     | 0.014 | PARP10       | 0.034 |
| 1124 | CUTA      | 0.013 | PDE8A        | 0.040 | NEIL1     | 0.014 | NRIP1        | 0.034 |
| 1125 | RPAIN     | 0.013 | MRE11A       | 0.040 | PEAK1     | 0.014 | MLL4         | 0.034 |
| 1126 | GPHN      | 0.013 | GYG1         | 0.040 | OBFC2A    | 0.014 | FKBP11       | 0.034 |
| 1127 | MFF       | 0.013 | ZNF189       | 0.040 | AASS      | 0.014 | MRPL39       | 0.035 |
| 1128 | KBTBD11   | 0.013 | SLC25A11     | 0.040 | MORF4L2   | 0.014 | FAM149B1     | 0.035 |
| 1129 | ZDHHC6    | 0.013 | HACE1        | 0.040 | ARHGEF7   | 0.014 | MRPS10       | 0.035 |
| 1130 | ITGA8     | 0.013 | ZSWIM7       | 0.040 | MSH2      | 0.014 | ORC2         | 0.035 |
| 1131 | FAM53B    | 0.013 | MTFP1        | 0.040 | SLC4A7    | 0.014 | STX10        | 0.035 |
| 1132 | ADRBK2    | 0.013 | APOBEC3F     | 0.040 | EPHB4     | 0.014 | MAD1L1       | 0.035 |
| 1133 | AXIN2     | 0.013 | PRDM2        | 0.040 | PSMA6     | 0.014 | TRDMT1       | 0.035 |
| 1134 | ZNF333    | 0.013 | ABCA1        | 0.040 | ISOC2     | 0.014 | DHX58        | 0.035 |
| 1135 | PGM3      | 0.013 | UBE2C        | 0.040 | DNM2      | 0.014 | MBD6         | 0.035 |
| 1136 | NOD1      | 0.013 | ZNF208       | 0.040 | SSH2      | 0.014 | QPCTL        | 0.035 |
| 1137 | CEP164    | 0.013 | RNPC3        | 0.040 | DPY19L2P2 | 0.014 | SCAI         | 0.035 |
| 1138 | SPPL2A    | 0.013 | UBA7         | 0.040 | IPW       | 0.014 | LIN54        | 0.035 |
| 1139 | UGGT2     | 0.013 | MAGED2       | 0.040 | ATF6      | 0.014 | GATAD2A      | 0.035 |
| 1140 | STMN3     | 0.013 | PHKA2        | 0.040 | CD200     | 0.014 | TBL3         | 0.035 |
| 1141 | MS4A1     | 0.013 | NDUFB7       | 0.041 | SGCB      | 0.014 | PIGT         | 0.035 |
| 1142 | RABEP1    | 0.013 | CD37         | 0.041 | RNASEH2B  | 0.014 | ZRANB2       | 0.035 |
| 1143 | PRKAA1    | 0.013 | PRDM15       | 0.041 | OPTN      | 0.014 | DDOST        | 0.035 |
| 1144 | MLL4      | 0.013 | FAM169A      | 0.041 | EID2B     | 0.014 | LRRC47       | 0.035 |
| 1145 | PWP2      | 0.013 | PAAF1        | 0.041 | CANX      | 0.014 | SLC25A23     | 0.035 |
| 1146 | TMEM39A   | 0.013 | KIAA1377     | 0.041 | TRPV2     | 0.014 | POLD1        | 0.036 |
| 1147 | YIPF5     | 0.013 | KIF3A        | 0.041 | ABHD13    | 0.014 | TOP1         | 0.036 |
| 1148 | MYO1F     | 0.013 | ZCCHC18      | 0.041 | DRAM2     | 0.014 | ATXN1        | 0.036 |
| 1149 | ALG9      | 0.014 | FCRL2        | 0.041 | HSD17B10  | 0.014 | FAM113A      | 0.036 |
| 1150 | FAM175A   | 0.014 | MKLN1        | 0.041 | STAT1     | 0.014 | MKL1         | 0.036 |
| 1151 | PITPNM2   | 0.014 | PBX3         | 0.041 | IRS2      | 0.014 | TRIB1        | 0.036 |
| 1152 | GIT1      | 0.014 | SCP2         | 0.041 | P2RX1     | 0.014 | HDHD1        | 0.036 |
| 1153 | CEACAM1   | 0.014 | FAM160B2     | 0.041 | FDX1      | 0.014 | TMEM180      | 0.036 |
| 1154 | RPS27     | 0.014 | ALKBH7       | 0.041 | AMZ2P1    | 0.014 | FAM102A      | 0.036 |

|      |              |       |              |       |           |       |          |       |
|------|--------------|-------|--------------|-------|-----------|-------|----------|-------|
| 1155 | LOC283070    | 0.014 | UGGT2        | 0.041 | GNS       | 0.014 | OTUD6B   | 0.036 |
| 1156 | FOXO3        | 0.014 | HGSNAT       | 0.041 | AQP3      | 0.014 | DMTF1    | 0.036 |
| 1157 | LYL1         | 0.014 | SLC30A5      | 0.041 | TMOD3     | 0.014 | NFE2L2   | 0.036 |
| 1158 | RASGRP2      | 0.014 | SGOL2        | 0.041 | GMDS      | 0.014 | OXR1     | 0.036 |
| 1159 | GLB1L        | 0.014 | CCDC47       | 0.041 | TYMP      | 0.014 | NUCKS1   | 0.036 |
| 1160 | MTDH         | 0.014 | MTX1         | 0.041 | ANKRD39   | 0.014 | SMARCAD1 | 0.036 |
| 1161 | MEPCE        | 0.014 | NBPF9        | 0.041 | MRPL23    | 0.014 | ZBTB7A   | 0.036 |
| 1162 | FCRLA        | 0.014 | QRSL1        | 0.041 | FCRLA     | 0.014 | MRPL30   | 0.036 |
| 1163 | PPP1R3E      | 0.014 | CCDC45       | 0.041 | METTL21B  | 0.014 | DTX3L    | 0.036 |
| 1164 | C1orf162     | 0.014 | PAN2         | 0.041 | FAM111B   | 0.014 | PRDX5    | 0.036 |
| 1165 | GNAZ         | 0.014 | TPI1         | 0.041 | ZNF181    | 0.014 | ZNF43    | 0.036 |
| 1166 | FAM38B       | 0.014 | ADA          | 0.041 | SWAP70    | 0.015 | CACNB2   | 0.036 |
| 1167 | SEPSECS      | 0.014 | MPDU1        | 0.041 | NMT2      | 0.015 | CCNC     | 0.036 |
| 1168 | SURF6        | 0.014 | LDHB         | 0.042 | NUP153    | 0.015 | FBXW7    | 0.036 |
| 1169 | PQLC1        | 0.014 | KRIT1        | 0.042 | MAP2K6    | 0.015 | PMS1     | 0.036 |
| 1170 | NOL7         | 0.014 | CBFA2T2      | 0.042 | TAF12     | 0.015 | ALKBH8   | 0.036 |
| 1171 | SFMBT2       | 0.014 | TRIM23       | 0.042 | EML3      | 0.015 | TBC1D17  | 0.036 |
| 1172 | MDC1         | 0.014 | ZC3H12D      | 0.042 | PCMTD2    | 0.015 | MPP5     | 0.036 |
| 1173 | SCIN         | 0.014 | TAF1A        | 0.042 | TCFL5     | 0.015 | LMF2     | 0.036 |
| 1174 | ATXN7L3B     | 0.014 | PHGDH        | 0.042 | NFIC      | 0.015 | CRELD2   | 0.036 |
| 1175 | LARP4        | 0.014 | ZNF100       | 0.042 | FLOT2     | 0.015 | KRIT1    | 0.036 |
| 1176 | C2Oorf111    | 0.014 | PHF21A       | 0.042 | LY96      | 0.015 | STARD10  | 0.036 |
| 1177 | TFEB         | 0.014 | FCRLA        | 0.042 | POGK      | 0.015 | EML2     | 0.036 |
| 1178 | LOC100294145 | 0.014 | ALG14        | 0.042 | COL24A1   | 0.015 | GSDMD    | 0.036 |
| 1179 | MAP3K8       | 0.014 | RFXANK       | 0.042 | SPG11     | 0.015 | SUN2     | 0.036 |
| 1180 | JAK1         | 0.014 | AP2M1        | 0.042 | HERC3     | 0.015 | CELSR2   | 0.037 |
| 1181 | SIN3A        | 0.014 | RASGRP2      | 0.042 | SFI1      | 0.015 | AKNA     | 0.037 |
| 1182 | HLA-DRA      | 0.014 | COMMD4       | 0.042 | IL6R      | 0.015 | KIAA1704 | 0.037 |
| 1183 | FXN          | 0.014 | RERE         | 0.042 | ACOX1     | 0.015 | USP49    | 0.037 |
| 1184 | MTCH1        | 0.014 | WDR11        | 0.042 | SNHG7     | 0.015 | RFXANK   | 0.037 |
| 1185 | IRF2BP2      | 0.014 | RAN          | 0.042 | SGSM2     | 0.015 | NOC4L    | 0.037 |
| 1186 | SATB1        | 0.014 | SH3YL1       | 0.042 | LTB       | 0.015 | PSME2    | 0.037 |
| 1187 | ATG16L2      | 0.014 | NDUFC1       | 0.042 | FGD3      | 0.015 | EFHA1    | 0.037 |
| 1188 | MAGED1       | 0.014 | LOC100131801 | 0.042 | NAP1L1    | 0.015 | DDX50    | 0.037 |
| 1189 | RBM5         | 0.014 | SCML4        | 0.042 | RARA      | 0.015 | NCLN     | 0.037 |
| 1190 | KBTD2        | 0.014 | RASGRP3      | 0.042 | C12orf11  | 0.015 | SERINC1  | 0.037 |
| 1191 | PLOD3        | 0.014 | BTLA         | 0.042 | EPHB6     | 0.015 | PUS7L    | 0.037 |
| 1192 | TCF7         | 0.014 | KIAA1407     | 0.042 | LARP4     | 0.015 | MTMR9    | 0.037 |
| 1193 | IKZF1        | 0.014 | CLDND1       | 0.042 | ZNF140    | 0.015 | ADORA2A  | 0.037 |
| 1194 | LOC728743    | 0.014 | ASF1B        | 0.042 | ZMYND8    | 0.015 | DOCK10   | 0.037 |
| 1195 | SLC30A6      | 0.014 | ZNFX1        | 0.042 | BTBD9     | 0.015 | INTS7    | 0.037 |
| 1196 | C6orf192     | 0.014 | FAN1         | 0.042 | PDXDC1    | 0.015 | DAK      | 0.037 |
| 1197 | PDK1         | 0.014 | UGDH         | 0.042 | CAMK2G    | 0.015 | NETO2    | 0.037 |
| 1198 | TFRC         | 0.014 | GFM2         | 0.042 | ZNF292    | 0.015 | FRMD8    | 0.037 |
| 1199 | SLC2A5       | 0.014 | PMS2P1       | 0.042 | USP35     | 0.015 | ABHD11   | 0.037 |
| 1200 | N4BP3        | 0.014 | IL6R         | 0.042 | MMADHC    | 0.015 | FADS3    | 0.037 |
| 1201 | AP2B1        | 0.014 | FARS2        | 0.042 | LRCH4     | 0.015 | TLR10    | 0.037 |
| 1202 | CENPE        | 0.014 | ZNF512       | 0.042 | VDAC1     | 0.015 | FLNA     | 0.037 |
| 1203 | C9orf119     | 0.014 | CAPRIN2      | 0.043 | GOLGA2B   | 0.015 | CSNK1G3  | 0.037 |
| 1204 | TOR3A        | 0.014 | NDUFS5       | 0.043 | KIAA1033  | 0.015 | INPP5E   | 0.037 |
| 1205 | C8orf37      | 0.014 | RNASSEL      | 0.043 | SMAGP     | 0.015 | FBRSL1   | 0.038 |
| 1206 | LAIR1        | 0.014 | ARL1         | 0.043 | SETBP1    | 0.015 | MRPL23   | 0.038 |
| 1207 | MAP3K3       | 0.014 | MYEOV2       | 0.043 | LOC283070 | 0.015 | DEF8     | 0.038 |
| 1208 | CUL4A        | 0.014 | PRKAG2       | 0.043 | ANKH      | 0.015 | S100BPB  | 0.038 |
| 1209 | ANXA2        | 0.014 | BTNL9        | 0.043 | ZHX3      | 0.015 | USP37    | 0.038 |
| 1210 | TCL1B        | 0.014 | YIPF5        | 0.043 | COMMD4    | 0.015 | AP1B1    | 0.038 |
| 1211 | HLA-DQA2     | 0.014 | DDX17        | 0.043 | ASPHD2    | 0.015 | AKR7A2   | 0.038 |
| 1212 | NR3C2        | 0.014 | ICOSLG       | 0.043 | CROCC     | 0.015 | ZNF581   | 0.038 |
| 1213 | SUMF2        | 0.014 | SNHG1        | 0.043 | NRBP1     | 0.015 | MAP3K11  | 0.038 |
| 1214 | TMEM184C     | 0.014 | GIPR         | 0.043 | TNFRSF13B | 0.015 | PRKCI    | 0.038 |
| 1215 | PATL1        | 0.014 | ZNF397       | 0.043 | RASGRF1   | 0.015 | ACP2     | 0.038 |
| 1216 | TBX6         | 0.014 | MBNL3        | 0.043 | ARPC5L    | 0.015 | PPM1K    | 0.038 |
| 1217 | CD47         | 0.014 | TCEB1        | 0.043 | GIGYF2    | 0.015 | FAM108A1 | 0.038 |
| 1218 | LDHB         | 0.014 | CYP2U1       | 0.043 | ZNF548    | 0.016 | PPP6R2   | 0.038 |
| 1219 | SRSF9        | 0.014 | HIVEP3       | 0.044 | C5        | 0.016 | ATP2A3   | 0.038 |
| 1220 | PTPRK        | 0.014 | IFIT5        | 0.044 | ALG13     | 0.016 | PPP1R14A | 0.038 |
| 1221 | IDUA         | 0.014 | CHD2         | 0.044 | GPAA1     | 0.016 | AKT2     | 0.038 |
| 1222 | NET1         | 0.014 | UBAP1        | 0.044 | CIITA     | 0.016 | CRYZL1   | 0.038 |
| 1223 | NDUFAF1      | 0.014 | PDXP         | 0.044 | DHPS      | 0.016 | IGHA1    | 0.038 |
| 1224 | TIMM44       | 0.014 | IGHD         | 0.044 | ZNF83     | 0.016 | IRF3     | 0.038 |
| 1225 | RG9MTD3      | 0.014 | KCNAB3       | 0.044 | ARFIP2    | 0.016 | IL7      | 0.038 |
| 1226 | SDF2L1       | 0.014 | ZNF274       | 0.044 | MAGEH1    | 0.016 | GOLPH3   | 0.038 |
| 1227 | ADI1         | 0.014 | TMEM220      | 0.044 | PIGK      | 0.016 | CALML4   | 0.038 |
| 1228 | ZNF354A      | 0.014 | ATAD2B       | 0.045 | YTHDC1    | 0.016 | C16orf74 | 0.038 |
| 1229 | OPTN         | 0.014 | IFI44        | 0.045 | ARAP2     | 0.016 | ARL8B    | 0.038 |
| 1230 | BCOR         | 0.014 | STRAP        | 0.045 | LCP1      | 0.016 | CHERP    | 0.038 |
| 1231 | MKMK2        | 0.014 | SIN3B        | 0.045 | TAPT1     | 0.016 | TRAM1    | 0.038 |
| 1232 | DCUN1D4      | 0.014 | TARS         | 0.045 | ARHGAP22  | 0.016 | MEGF6    | 0.038 |

|      |          |       |              |       |              |       |            |       |
|------|----------|-------|--------------|-------|--------------|-------|------------|-------|
| 1233 | C18orf25 | 0.014 | GALNT6       | 0.045 | TSPYL2       | 0.016 | ABCA5      | 0.038 |
| 1234 | LAPTM5   | 0.014 | C20orf29     | 0.045 | NDUFAF1      | 0.016 | AMDHD2     | 0.038 |
| 1235 | ZBTB26   | 0.014 | SLBP         | 0.045 | ZFX          | 0.016 | ANKRD36BP2 | 0.038 |
| 1236 | MBD6     | 0.014 | MBD4         | 0.045 | NR1D2        | 0.016 | PPA2       | 0.038 |
| 1237 | CXCR5    | 0.014 | GLT25D1      | 0.045 | BCKDHA       | 0.016 | SRSF10     | 0.038 |
| 1238 | H6PD     | 0.014 | DTX3L        | 0.045 | CISD2        | 0.016 | GBP1       | 0.038 |
| 1239 | TRAF3IP3 | 0.014 | C15orf39     | 0.045 | NOD1         | 0.016 | CRTC2      | 0.038 |
| 1240 | CBX1     | 0.014 | CLCN6        | 0.045 | CD320        | 0.016 | PDCD10     | 0.038 |
| 1241 | PEX2     | 0.014 | POLQ         | 0.045 | CD1D         | 0.016 | KLF2       | 0.038 |
| 1242 | LRCH4    | 0.014 | CUTA         | 0.045 | MFSD6        | 0.016 | C12orf4    | 0.038 |
| 1243 | CCDC69   | 0.014 | QTRTD1       | 0.045 | LOC643749    | 0.016 | SLC9A1     | 0.038 |
| 1244 | CCDC137  | 0.014 | C1orf122     | 0.045 | ZNF860       | 0.016 | SPAG9      | 0.038 |
| 1245 | TBL1X    | 0.014 | ARNTL2       | 0.045 | FAM96B       | 0.016 | GPD2       | 0.038 |
| 1246 | TMEM150A | 0.014 | TSPAN33      | 0.045 | SERTAD2      | 0.017 | HSD17B10   | 0.038 |
| 1247 | ANKRD44  | 0.014 | ERN1         | 0.045 | HIP1R        | 0.017 | C7orf59    | 0.038 |
| 1248 | BCL6     | 0.014 | SMC6         | 0.045 | CCDC90A      | 0.017 | XPO1       | 0.038 |
| 1249 | KLHL14   | 0.014 | COPS3        | 0.045 | PAX5         | 0.017 | BAG5       | 0.038 |
| 1250 | SPTY2D1  | 0.014 | KIAA1704     | 0.045 | STK24        | 0.017 | HLTF       | 0.038 |
| 1251 | DYNLL1   | 0.014 | ATP1B3       | 0.045 | KIAA1731     | 0.017 | FAM126B    | 0.038 |
| 1252 | EARS2    | 0.014 | PI4K2B       | 0.045 | IGFBP4       | 0.017 | LOC388796  | 0.038 |
| 1253 | ALG3     | 0.014 | WIBG         | 0.045 | TUBA1A       | 0.017 | TAZ        | 0.038 |
| 1254 | UQCRB    | 0.014 | LOC100271722 | 0.045 | TP73         | 0.017 | ZNF431     | 0.039 |
| 1255 | KIF21B   | 0.014 | SERPINB9     | 0.046 | TRMT2B       | 0.017 | MOSPD3     | 0.039 |
| 1256 | ZNF566   | 0.014 | TAF12        | 0.046 | ZNF431       | 0.017 | CPNE5      | 0.039 |
| 1257 | CREBBP   | 0.014 | RASGEF1B     | 0.046 | C3orf63      | 0.017 | MRPL41     | 0.039 |
| 1258 | STK38    | 0.014 | HMGB3        | 0.046 | MORC3        | 0.017 | NARS       | 0.039 |
| 1259 | TUG1     | 0.014 | TLR1         | 0.046 | FOXP1        | 0.017 | XPOT       | 0.039 |
| 1260 | PELI2    | 0.014 | SLC29A2      | 0.046 | HOMER3       | 0.017 | SPSB3      | 0.039 |
| 1261 | GAB3     | 0.014 | VRK1         | 0.046 | TFR2         | 0.017 | NUP37      | 0.039 |
| 1262 | KLF16    | 0.014 | MBTD1        | 0.046 | AZ12         | 0.017 | UBQLN1     | 0.039 |
| 1263 | ZNF618   | 0.014 | MRPL36       | 0.046 | ATP5C1       | 0.017 | ZNF615     | 0.039 |
| 1264 | CREB3    | 0.014 | SEC31B       | 0.046 | PLA2G6       | 0.017 | TUBA4A     | 0.039 |
| 1265 | STIM1    | 0.014 | MTMR10       | 0.046 | ZNF737       | 0.017 | HDAC7      | 0.039 |
| 1266 | CALR     | 0.014 | DIS3L2       | 0.046 | SYPL1        | 0.017 | TSPAN32    | 0.039 |
| 1267 | PGK1     | 0.014 | ZNF862       | 0.046 | CCDC117      | 0.017 | ALG12      | 0.039 |
| 1268 | TIGD7    | 0.014 | SLC5A6       | 0.046 | HPS3         | 0.017 | PRRC2A     | 0.039 |
| 1269 | SYAP1    | 0.014 | SLCO4A1      | 0.046 | KIAA0930     | 0.017 | MCCC1      | 0.039 |
| 1270 | WSB1     | 0.014 | HJURP        | 0.046 | ZNF407       | 0.017 | OSBPL3     | 0.039 |
| 1271 | PGRMC2   | 0.014 | MX2          | 0.046 | CD74         | 0.017 | ZFP2       | 0.039 |
| 1272 | SEPT7P2  | 0.014 | NR2C2        | 0.047 | WDR18        | 0.017 | KIAA1009   | 0.039 |
| 1273 | USP39    | 0.014 | CINP         | 0.047 | MRPL55       | 0.017 | MYO1D      | 0.039 |
| 1274 | EXT1     | 0.014 | CABLES1      | 0.047 | DUSP5        | 0.017 | MAML3      | 0.039 |
| 1275 | TBL2     | 0.014 | ASPHD2       | 0.047 | TCL6         | 0.017 | LHPP       | 0.040 |
| 1276 | KIAA0368 | 0.014 | CLMN         | 0.047 | CIRBP        | 0.017 | BTAF1      | 0.040 |
| 1277 | ATP5G3   | 0.014 | STK17A       | 0.047 | CHD1         | 0.017 | TP53I13    | 0.040 |
| 1278 | GPR172A  | 0.014 | ATP10D       | 0.047 | PILRB        | 0.018 | WDR67      | 0.040 |
| 1279 | PARP14   | 0.014 | ZNF418       | 0.047 | FAM116A      | 0.018 | NCOA3      | 0.040 |
| 1280 | USP37    | 0.014 | TARDBP       | 0.047 | C5orf42      | 0.018 | DENND1C    | 0.040 |
| 1281 | USP20    | 0.014 | TARBP1       | 0.047 | C7orf40      | 0.018 | RPN1       | 0.040 |
| 1282 | SP100    | 0.014 | ST8SIA4      | 0.047 | LOC100130581 | 0.018 | C10orf137  | 0.040 |
| 1283 | ACAP1    | 0.014 | CEP97        | 0.047 | PROCA1       | 0.018 | GTF2F2     | 0.040 |
| 1284 | NUCB1    | 0.014 | CCT7         | 0.047 | PIK3CD       | 0.018 | HSPA5      | 0.040 |
| 1285 | SPINT2   | 0.014 | SLC1A5       | 0.047 | CCNT2        | 0.018 | SNX2       | 0.040 |
| 1286 | PRDX3    | 0.014 | MTRR         | 0.047 | ITPK1        | 0.018 | TAGAP      | 0.040 |
| 1287 | BSG      | 0.015 | ZNF814       | 0.047 | MEF2C        | 0.018 | SRSF9      | 0.040 |
| 1288 | DYRK1A   | 0.015 | POLR1E       | 0.047 | CASP7        | 0.018 | SCAMP4     | 0.040 |
| 1289 | CSK      | 0.015 | ALG1         | 0.048 | SCYL3        | 0.018 | CLCN4      | 0.040 |
| 1290 | SLC25A37 | 0.015 | RABEP2       | 0.048 | ATP7A        | 0.018 | WDR85      | 0.040 |
| 1291 | MICALL1  | 0.015 | UBL5         | 0.048 | TARSL2       | 0.018 | EML5       | 0.040 |
| 1292 | NOP10    | 0.015 | GPX7         | 0.048 | OAS3         | 0.018 | NCKAP5L    | 0.040 |
| 1293 | ZBTB22   | 0.015 | POC1A        | 0.048 | NISCH        | 0.018 | QSER1      | 0.040 |
| 1294 | BAZ1A    | 0.015 | CAPN3        | 0.048 | ZDHHC16      | 0.018 | ZNF652     | 0.041 |
| 1295 | ZMYM3    | 0.015 | NSUN5P2      | 0.048 | HIPK3        | 0.018 | STYX       | 0.041 |
| 1296 | H2AFV    | 0.015 | KIF4A        | 0.048 | PSMD9        | 0.018 | SNX6       | 0.041 |
| 1297 | FCHO1    | 0.015 | DCTN3        | 0.048 | SLC17A9      | 0.018 | IFT80      | 0.041 |
| 1298 | GMNN     | 0.015 | HERC3        | 0.049 | ZNF43        | 0.018 | ARHGEF1    | 0.041 |
| 1299 | SLC25A45 | 0.015 | PSMD12       | 0.049 | REL          | 0.018 | MYNN       | 0.041 |
| 1300 | NETO2    | 0.015 | GGT7         | 0.049 | PXK          | 0.018 | ZBTB11     | 0.041 |
| 1301 | HLA-DRB5 | 0.015 | HLA-DMB      | 0.049 | IFNAR2       | 0.018 | CCDC106    | 0.041 |
| 1302 | LPAR5    | 0.015 | DOPEY2       | 0.050 | CRLS1        | 0.018 | CAB39      | 0.041 |
| 1303 | EML3     | 0.015 | PIGV         | 0.050 | ABR          | 0.018 | PTK2B      | 0.041 |
| 1304 | KIAA1274 | 0.015 | LILRB4       | 0.050 | ACER2        | 0.018 | RABEP2     | 0.041 |
| 1305 | ZNF337   | 0.015 | ISOC1        | 0.050 | G6PC3        | 0.018 | ZNF708     | 0.041 |
| 1306 | KIAA1407 | 0.015 | C6orf192     | 0.050 | USP37        | 0.018 | BARD1      | 0.041 |
| 1307 | PPFIBP2  | 0.015 | PSMD7        | 0.050 | BHLHE41      | 0.018 | TMEM129    | 0.041 |
| 1308 | ZBTB44   | 0.015 | ZNF821       | 0.050 | FGD1         | 0.018 | SEMA4B     | 0.041 |
| 1309 | PLD2     | 0.015 | MASP2        | 0.050 | MOBK1A       | 0.019 | GTF3C6     | 0.041 |
| 1310 | CCDC117  | 0.015 |              |       | DECR1        | 0.019 | SCAF1      | 0.041 |

|      |           |       |           |       |          |       |
|------|-----------|-------|-----------|-------|----------|-------|
| 1311 | SPIB      | 0.015 | KRT18     | 0.019 | IPO7     | 0.041 |
| 1312 | ITPR1     | 0.015 | LOC399815 | 0.019 | CXXC1    | 0.041 |
| 1313 | RHOQ      | 0.015 | MYBL1     | 0.019 | MRPL50   | 0.041 |
| 1314 | EIF3A     | 0.015 | ANKRD11   | 0.019 | SLC44A1  | 0.041 |
| 1315 | OSM       | 0.015 | LGMN      | 0.019 | HGS      | 0.041 |
| 1316 | ANKIB1    | 0.015 | TNFSF4    | 0.019 | INTS1    | 0.041 |
| 1317 | EFHD2     | 0.015 | BEND4     | 0.019 | DOT1L    | 0.041 |
| 1318 | CELSR1    | 0.015 | TST       | 0.019 | ERO1LB   | 0.041 |
| 1319 | ZNF226    | 0.015 | FKBP14    | 0.019 | TNIP2    | 0.041 |
| 1320 | PSMA3     | 0.015 | VNN2      | 0.019 | PEX13    | 0.041 |
| 1321 | ZNF264    | 0.015 | MYOM1     | 0.019 | ZNF784   | 0.041 |
| 1322 | LGALS1    | 0.015 | ARMCX2    | 0.019 | MCOLN1   | 0.041 |
| 1323 | MIER1     | 0.015 | OTUD3     | 0.019 | C9orf86  | 0.041 |
| 1324 | ABHD3     | 0.015 | MTR       | 0.019 | ALDH16A1 | 0.041 |
| 1325 | USPL1     | 0.015 | ABHD12    | 0.019 | UBA3     | 0.041 |
| 1326 | CCDC88A   | 0.015 | P2RY10    | 0.019 | CHTF18   | 0.041 |
| 1327 | ARSD      | 0.015 | SF3B5     | 0.019 | FGD6     | 0.041 |
| 1328 | MMP17     | 0.015 | ZC3H12D   | 0.019 | LZTS2    | 0.041 |
| 1329 | NADSYN1   | 0.015 | STMN3     | 0.019 | HIP1R    | 0.041 |
| 1330 | NUDT16    | 0.015 | TTC39C    | 0.019 | OSTC     | 0.041 |
| 1331 | ST3GAL1   | 0.015 | TMED1     | 0.019 | BLZF1    | 0.041 |
| 1332 | ITGA4     | 0.015 | NAV1      | 0.019 | DDX54    | 0.041 |
| 1333 | MAGEH1    | 0.015 | COX18     | 0.019 | CD164    | 0.041 |
| 1334 | CAPN2     | 0.015 | EIF2AK2   | 0.019 | UTP11L   | 0.041 |
| 1335 | C5orf43   | 0.015 | TSPAN3    | 0.019 | MIER1    | 0.041 |
| 1336 | DDX60     | 0.015 | TBXA2R    | 0.019 | EXOC5    | 0.041 |
| 1337 | PI4KA     | 0.015 | PION      | 0.019 | WAPAL    | 0.041 |
| 1338 | PTK2      | 0.015 | FAM69B    | 0.019 | PURB     | 0.041 |
| 1339 | EIF4G1    | 0.015 | JMY       | 0.019 | CLDND1   | 0.041 |
| 1340 | LOC283663 | 0.015 | ZNF516    | 0.019 | TGFBR1   | 0.041 |
| 1341 | MOGS      | 0.015 | CSDA      | 0.019 | C19orf63 | 0.041 |
| 1342 | ARAP2     | 0.015 | PCDH9     | 0.019 | ENGASE   | 0.041 |
| 1343 | CCDC14    | 0.015 | INSR      | 0.019 | ARFGAP3  | 0.042 |
| 1344 | AIM1      | 0.015 | COMMD6    | 0.020 | SH3TC1   | 0.042 |
| 1345 | NDUFS5    | 0.015 | IDI1      | 0.020 | ZNF507   | 0.042 |
| 1346 | REXO1     | 0.015 | WBSCR22   | 0.020 | FAM3A    | 0.042 |
| 1347 | LAT2      | 0.015 | FCHSD2    | 0.020 | GET4     | 0.042 |
| 1348 | EZH1      | 0.015 | STK38     | 0.020 | VAC14    | 0.042 |
| 1349 | ZNF711    | 0.015 | BEX5      | 0.020 | TRAF7    | 0.042 |
| 1350 | DYRK2     | 0.015 | LAMP2     | 0.020 | CNO      | 0.042 |
| 1351 | CRTC1     | 0.015 | TRAPPC2   | 0.020 | WDR48    | 0.042 |
| 1352 | PION      | 0.015 | YARS      | 0.020 | SOS2     | 0.042 |
| 1353 | TLN1      | 0.015 | POLI      | 0.020 | SUB1     | 0.042 |
| 1354 | DENND2D   | 0.015 | APP       | 0.020 | C1orf151 | 0.042 |
| 1355 | TNFSF12   | 0.015 | CROCCP2   | 0.020 | ANKRD44  | 0.042 |
| 1356 | DENND2C   | 0.015 | TTC35     | 0.020 | ATG9B    | 0.042 |
| 1357 | C6orf48   | 0.015 | PSMC3     | 0.020 | SEC61A1  | 0.042 |
| 1358 | SLC10A7   | 0.015 | MAP2      | 0.020 | GPR137   | 0.042 |
| 1359 | RAPGEF1   | 0.015 | MRPL51    | 0.020 | PLXNA1   | 0.042 |
| 1360 | RABEP2    | 0.015 | ABCB1     | 0.020 | RBCK1    | 0.042 |
| 1361 | NUP153    | 0.015 | TGFBR2    | 0.020 | SIPA1L3  | 0.042 |
| 1362 | KIAA1267  | 0.015 | SLC9A3R1  | 0.020 | NEDD1    | 0.042 |
| 1363 | MST4      | 0.015 | ZNF555    | 0.020 | SAAL1    | 0.042 |
| 1364 | ZFAND5    | 0.015 | COX6C     | 0.020 | C19orf25 | 0.042 |
| 1365 | PRR11     | 0.015 | PHF17     | 0.020 | UNC119   | 0.042 |
| 1366 | DVL2      | 0.015 | UTP18     | 0.020 | C5orf22  | 0.042 |
| 1367 | HEXDC     | 0.015 | INPP5A    | 0.020 | ZSCAN18  | 0.042 |
| 1368 | CNOT8     | 0.015 | GPLD1     | 0.020 | MBNL3    | 0.042 |
| 1369 | ZNF268    | 0.015 | DIMT1L    | 0.020 | LIN7C    | 0.042 |
| 1370 | ELF2      | 0.015 | ARL11     | 0.020 | PHF3     | 0.042 |
| 1371 | NCR3      | 0.015 | C17orf85  | 0.020 | RB1      | 0.042 |
| 1372 | SMCR7L    | 0.015 | PREX1     | 0.020 | IDE      | 0.042 |
| 1373 | LOC221442 | 0.015 | ARID4B    | 0.020 | ORAI3    | 0.042 |
| 1374 | S1PR2     | 0.015 | LEPRE1    | 0.020 | CYHR1    | 0.042 |
| 1375 | COPS6     | 0.015 | ZCCHC18   | 0.020 | FAR1     | 0.042 |
| 1376 | CCDC90B   | 0.015 | KIAA1407  | 0.020 | FBXL6    | 0.042 |
| 1377 | MGAT1     | 0.015 | TUG1      | 0.020 | INTS2    | 0.042 |
| 1378 | BST2      | 0.015 | MS4A1     | 0.021 | MGRN1    | 0.042 |
| 1379 | KLF2      | 0.015 | TAP1      | 0.021 | TLN1     | 0.042 |
| 1380 | ENTPD4    | 0.015 | ETAA1     | 0.021 | TM9SF3   | 0.042 |
| 1381 | PSMA2     | 0.015 | GPR160    | 0.021 | PTPRJ    | 0.042 |
| 1382 | PRKCSH    | 0.015 | PPARA     | 0.021 | KIAA1468 | 0.042 |
| 1383 | MGA       | 0.015 | PAPSS1    | 0.021 | FAM83G   | 0.042 |
| 1384 | CBFA2T2   | 0.015 | TCF7      | 0.021 | ZYX      | 0.042 |
| 1385 | DECR1     | 0.015 | FAM89B    | 0.021 | DNPEP    | 0.042 |
| 1386 | ESF1      | 0.015 | SMOX      | 0.021 | TXLNG    | 0.042 |
| 1387 | MTMR4     | 0.015 | SLC25A24  | 0.021 | TBX6     | 0.042 |
| 1388 | CHAC2     | 0.015 | MSL3      | 0.021 | SPOPL    | 0.042 |

|      |           |       |           |       |           |       |
|------|-----------|-------|-----------|-------|-----------|-------|
| 1389 | ASAP1     | 0.015 | SLC35B2   | 0.021 | MCOLN2    | 0.042 |
| 1390 | RBX1      | 0.015 | ATP6V0E2  | 0.021 | LUC7L3    | 0.043 |
| 1391 | ICOSLG    | 0.015 | SLC2A13   | 0.021 | L1CAM     | 0.043 |
| 1392 | HLA-DRB6  | 0.015 | LINGO3    | 0.021 | SLC29A2   | 0.043 |
| 1393 | MLH3      | 0.015 | SESN1     | 0.021 | DDX60     | 0.043 |
| 1394 | ANKRD11   | 0.015 | ZNF502    | 0.021 | ZNF362    | 0.043 |
| 1395 | LOC646762 | 0.015 | CYB5A     | 0.021 | DYNC1I2   | 0.043 |
| 1396 | FGD2      | 0.015 | TAF13     | 0.021 | TMED2     | 0.043 |
| 1397 | UCHL3     | 0.015 | ADAM28    | 0.021 | GAMT      | 0.043 |
| 1398 | TP53BP2   | 0.015 | APBB2     | 0.021 | GPS2      | 0.043 |
| 1399 | C17orf57  | 0.015 | RDX       | 0.021 | GPRIN1    | 0.043 |
| 1400 | ERH       | 0.015 | GNB4      | 0.021 | CLN5      | 0.043 |
| 1401 | SCAMP2    | 0.015 | SSSCA1    | 0.021 | PITPNB    | 0.043 |
| 1402 | ZNF776    | 0.015 | CDHR3     | 0.021 | PRKAR1A   | 0.043 |
| 1403 | ZNF793    | 0.015 | PRCP      | 0.021 | CCDC124   | 0.043 |
| 1404 | AFF3      | 0.015 | YPEL1     | 0.021 | REST      | 0.043 |
| 1405 | TMEM85    | 0.015 | SLC9A7    | 0.021 | ITPA      | 0.043 |
| 1406 | ETF1      | 0.015 | RPL26L1   | 0.021 | PGM3      | 0.043 |
| 1407 | BANK1     | 0.015 | DLGAP4    | 0.021 | IL1RAP    | 0.043 |
| 1408 | FCRL3     | 0.015 | ZNF429    | 0.021 | ATAD3B    | 0.043 |
| 1409 | PPM1M     | 0.015 | MTHFD1L   | 0.021 | ZNF668    | 0.043 |
| 1410 | DCTN2     | 0.015 | C7orf26   | 0.021 | GMIP      | 0.043 |
| 1411 | MGLL      | 0.015 | LCOR      | 0.021 | SH2D3A    | 0.043 |
| 1412 | HEMK1     | 0.015 | NBEA      | 0.021 | NR2C1     | 0.043 |
| 1413 | MSL3      | 0.015 | CHST7     | 0.022 | UHMK1     | 0.043 |
| 1414 | EPB41L2   | 0.015 | ADCK2     | 0.022 | UBR2      | 0.043 |
| 1415 | MTHFR     | 0.015 | SLC38A9   | 0.022 | TCEB2     | 0.043 |
| 1416 | HLA-DPA1  | 0.015 | C10orf58  | 0.022 | STAT1     | 0.043 |
| 1417 | PLEKHF2   | 0.015 | GPR15     | 0.022 | DOHH      | 0.043 |
| 1418 | DNAJB2    | 0.015 | TAF9      | 0.022 | INF2      | 0.043 |
| 1419 | GMDS      | 0.015 | MDM1      | 0.022 | RAB11FIP2 | 0.043 |
| 1420 | ETV6      | 0.015 | PLEKHH3   | 0.022 | ZNF513    | 0.043 |
| 1421 | RAP1A     | 0.015 | TNFRSF13C | 0.022 | ZNF598    | 0.043 |
| 1422 | IFNAR2    | 0.015 | SNF8      | 0.022 | DIMT1L    | 0.043 |
| 1423 | ETS1      | 0.015 | GPM6B     | 0.022 | MICAL1    | 0.043 |
| 1424 | SIGLEC10  | 0.015 | ZNF767    | 0.022 | ANP32E    | 0.043 |
| 1425 | C19orf71  | 0.015 | ATN1      | 0.022 | ZNF84     | 0.043 |
| 1426 | CHTOP     | 0.015 | FAM177B   | 0.022 | IQCE      | 0.043 |
| 1427 | DEXI      | 0.015 | ZNF559    | 0.022 | SASS6     | 0.043 |
| 1428 | DDX55     | 0.015 | WWC3      | 0.022 | P4HB      | 0.043 |
| 1429 | MED13L    | 0.015 | UGCG      | 0.022 | COMMD2    | 0.044 |
| 1430 | TAGAP     | 0.015 | TXLNB     | 0.022 | HCFC1     | 0.044 |
| 1431 | LIME1     | 0.015 | CLCN6     | 0.022 | NUDT16L1  | 0.044 |
| 1432 | ATG12     | 0.015 | PVRIG     | 0.022 | GLRX2     | 0.044 |
| 1433 | C1orf85   | 0.015 | NME4      | 0.022 | DBP       | 0.044 |
| 1434 | ATP6V0B   | 0.015 | RIMKLB    | 0.022 | SMG6      | 0.044 |
| 1435 | APAF1     | 0.015 | GSTZ1     | 0.022 | ARAP1     | 0.044 |
| 1436 | KCNH8     | 0.015 | MCART6    | 0.022 | KIAA0913  | 0.044 |
| 1437 | SERF2     | 0.015 | ALG8      | 0.022 | GPA33     | 0.044 |
| 1438 | ZMAT1     | 0.015 | C14orf43  | 0.022 | ATP2C1    | 0.044 |
| 1439 | ZNF100    | 0.015 | PPCDC     | 0.022 | CCDC75    | 0.044 |
| 1440 | UHRF2     | 0.015 | NQO1      | 0.022 | POLD3     | 0.044 |
| 1441 | TSTD1     | 0.015 | TRIP6     | 0.022 | ORMDL3    | 0.044 |
| 1442 | JUND      | 0.015 | FAM40A    | 0.022 | SLC39A13  | 0.044 |
| 1443 | IKBKG     | 0.015 | ABCC5     | 0.022 | PRMT7     | 0.044 |
| 1444 | KIAA0495  | 0.015 | SESN3     | 0.022 | KDM6B     | 0.044 |
| 1445 | RBBP8     | 0.015 | CARNS1    | 0.022 | HNRNPH1   | 0.044 |
| 1446 | FUCA2     | 0.015 | HMHA1     | 0.022 | RFC1      | 0.044 |
| 1447 | TRMT2B    | 0.015 | MRPS26    | 0.022 | UHRF1BP1  | 0.044 |
| 1448 | IGFLR1    | 0.015 | SEMA4B    | 0.022 | UBXN11    | 0.044 |
| 1449 | NR1D1     | 0.015 | GPD2      | 0.023 | SUV420H1  | 0.044 |
| 1450 | ZNF211    | 0.015 | GSTP1     | 0.023 | ASNSD1    | 0.044 |
| 1451 | ZNF692    | 0.016 | IL12RB2   | 0.023 | GDPD5     | 0.044 |
| 1452 | ERC1      | 0.016 | HTR3A     | 0.023 | LRRC45    | 0.044 |
| 1453 | MAPRE1    | 0.016 | ATP5J2    | 0.023 | MRPL49    | 0.044 |
| 1454 | CHST12    | 0.016 | RNF130    | 0.023 | TMEM160   | 0.044 |
| 1455 | ASB16     | 0.016 | ZNF708    | 0.023 | PI4K2B    | 0.045 |
| 1456 | FOXP4     | 0.016 | ANXA4     | 0.023 | FLYWCH1   | 0.045 |
| 1457 | ADARB1    | 0.016 | HCK       | 0.023 | TRIOBP    | 0.045 |
| 1458 | FCHSD1    | 0.016 | KATNAL1   | 0.023 | LARP4     | 0.045 |
| 1459 | MRPS15    | 0.016 | ATAD2B    | 0.023 | EC1       | 0.045 |
| 1460 | FYCO1     | 0.016 | HMGXB3    | 0.023 | PCYOX1    | 0.045 |
| 1461 | B3GNT9    | 0.016 | SYTL2     | 0.023 | POLL      | 0.045 |
| 1462 | SUCLG1    | 0.016 | ITPR1     | 0.023 | BAIAP3    | 0.045 |
| 1463 | GTF2B     | 0.016 | PLEK      | 0.023 | JMY       | 0.045 |
| 1464 | TBCD      | 0.016 | GABBR1    | 0.023 | SARS2     | 0.045 |
| 1465 | TAF1      | 0.016 | TTC24     | 0.023 | SMG1      | 0.045 |
| 1466 | B2M       | 0.016 | CTSO      | 0.023 | PSMA3     | 0.045 |



|      |            |       |          |       |          |       |
|------|------------|-------|----------|-------|----------|-------|
| 1467 | VDR        | 0.016 | ZBTB1    | 0.023 | MRPL47   | 0.045 |
| 1468 | MBNL3      | 0.016 | SEMA3G   | 0.023 | BTBD7    | 0.045 |
| 1469 | ZNF33A     | 0.016 | KCNIP2   | 0.023 | RB1CC1   | 0.045 |
| 1470 | RELT       | 0.016 | PEA15    | 0.023 | RPUSD1   | 0.045 |
| 1471 | PDCL3      | 0.016 | PASK     | 0.023 | ETNK1    | 0.046 |
| 1472 | NUF2       | 0.016 | GSPT1    | 0.023 | PPP1CB   | 0.046 |
| 1473 | SHFM1      | 0.016 | CASK     | 0.023 | HPCAL1   | 0.046 |
| 1474 | ZNF512     | 0.016 | NPHP1    | 0.023 | RPAP2    | 0.046 |
| 1475 | HLA-F      | 0.016 | KIN      | 0.023 | SEC63    | 0.046 |
| 1476 | SNED1      | 0.016 | SNORD104 | 0.024 | GMEB2    | 0.046 |
| 1477 | NUAK2      | 0.016 | STX6     | 0.024 | YTHDC1   | 0.046 |
| 1478 | PSMD11     | 0.016 | ZNF318   | 0.024 | FAM160B2 | 0.046 |
| 1479 | PPP1R14A   | 0.016 | YIPF3    | 0.024 | NFKBIB   | 0.046 |
| 1480 | ATPAF1     | 0.016 | SKAP2    | 0.024 | BZW1     | 0.046 |
| 1481 | ZNF593     | 0.016 | ZYG11A   | 0.024 | RANGAP1  | 0.046 |
| 1482 | CROCCP2    | 0.016 | CSTB     | 0.024 | PKN3     | 0.046 |
| 1483 | UBE2E1     | 0.016 | SIK2     | 0.024 | TCF7     | 0.046 |
| 1484 | ABCBI      | 0.016 | THAP2    | 0.024 | MDM2     | 0.046 |
| 1485 | DENND1C    | 0.016 | IKBIP    | 0.024 | CCDC85B  | 0.046 |
| 1486 | LGALS9     | 0.016 | SDK2     | 0.024 | PIK3CA   | 0.046 |
| 1487 | FGFR1      | 0.016 | ID12-AS1 | 0.024 | C16orf52 | 0.046 |
| 1488 | TRIM56     | 0.016 | EIF2AK4  | 0.024 | MAGOHB   | 0.047 |
| 1489 | PRDX1      | 0.016 | FAH      | 0.024 | SLC22A18 | 0.047 |
| 1490 | KCP        | 0.016 | SCAF11   | 0.024 | AAAS     | 0.047 |
| 1491 | PCGF3      | 0.016 | SNX13    | 0.024 | EPT1     | 0.047 |
| 1492 | CDK5RAP2   | 0.016 | RBM3     | 0.024 | PRIC285  | 0.047 |
| 1493 | KLF8       | 0.016 | LRRC8C   | 0.024 | LIG4     | 0.047 |
| 1494 | WRNIP1     | 0.016 | NAA35    | 0.024 | IGHE     | 0.047 |
| 1495 | LOC647310  | 0.016 | PIK3AP1  | 0.024 | SLC25A17 | 0.047 |
| 1496 | SYTL1      | 0.016 | ZNF721   | 0.024 | C3orf38  | 0.047 |
| 1497 | GATAD1     | 0.016 | ENC1     | 0.024 | MTX3     | 0.047 |
| 1498 | ATP6AP2    | 0.016 | LYST     | 0.024 | LMNB2    | 0.047 |
| 1499 | PCNXL2     | 0.016 | WDR5B    | 0.024 | SGTA     | 0.047 |
| 1500 | ZNF395     | 0.016 | MAT2A    | 0.024 | FZR1     | 0.047 |
| 1501 | TPP2       | 0.016 | ZNF274   | 0.024 | MAP7D1   | 0.047 |
| 1502 | GOLGA2B    | 0.016 | KIAA1468 | 0.024 | TMEM161A | 0.047 |
| 1503 | ARF1       | 0.016 | ETFA     | 0.024 | IFI44L   | 0.047 |
| 1504 | CHMP7      | 0.016 | PLXNA3   | 0.024 | ABCA7    | 0.047 |
| 1505 | ZNF737     | 0.016 | CCT8     | 0.025 | TCEB1    | 0.047 |
| 1506 | ARHGEF6    | 0.016 | HKR1     | 0.025 | WWP2     | 0.047 |
| 1507 | GCA        | 0.016 | TSPYL4   | 0.025 | TLK1     | 0.047 |
| 1508 | PGAP3      | 0.016 | GAPDH    | 0.025 | ACAP2    | 0.047 |
| 1509 | CAST       | 0.016 | ANKS6    | 0.025 | CIC      | 0.047 |
| 1510 | FBRSL1     | 0.016 | FCGR2B   | 0.025 | TBC1D10B | 0.047 |
| 1511 | GSTM2      | 0.016 | MINPP1   | 0.025 | SRM      | 0.047 |
| 1512 | CHMP1B     | 0.016 | CD99L2   | 0.025 | PCGF5    | 0.047 |
| 1513 | CEP97      | 0.016 | ZNF808   | 0.025 | THAP2    | 0.047 |
| 1514 | SELL       | 0.016 | XPOT     | 0.025 | ATP6V1A  | 0.047 |
| 1515 | CERK       | 0.016 | IGSF8    | 0.025 | SLC5A3   | 0.047 |
| 1516 | EZH2       | 0.016 | MIB2     | 0.025 | NOL8     | 0.047 |
| 1517 | NCRNA00152 | 0.016 | MMACHC   | 0.025 | DICER1   | 0.047 |
| 1518 | INTS9      | 0.016 | RALGPS2  | 0.025 | MRPL4    | 0.047 |
| 1519 | SLAIN2     | 0.016 | USPL1    | 0.025 | AP1S3    | 0.047 |
| 1520 | UCHL1      | 0.016 | ABCB4    | 0.025 | GLTPD1   | 0.047 |
| 1521 | COX6B1     | 0.016 | MAPRE2   | 0.025 | IFIT3    | 0.047 |
| 1522 | CXXC5      | 0.016 | BBX      | 0.025 | IFI44    | 0.047 |
| 1523 | CLCF1      | 0.016 | NUFIP2   | 0.025 | FEZ2     | 0.047 |
| 1524 | TBRG1      | 0.016 | ALOX5    | 0.025 | ICK      | 0.047 |
| 1525 | GPR137B    | 0.016 | KIAA1024 | 0.025 | KAT2B    | 0.048 |
| 1526 | GOLPH3     | 0.016 | SDHA     | 0.025 | ETAA1    | 0.048 |
| 1527 | DCLRE1A    | 0.016 | AP1S2    | 0.025 | FAM38A   | 0.048 |
| 1528 | HLA-DQA1   | 0.016 | PTPRF    | 0.026 | CUL3     | 0.048 |
| 1529 | ZYX        | 0.016 | GAPT     | 0.026 | ANKHD1   | 0.048 |
| 1530 | UBXN1      | 0.016 | ARHGAP17 | 0.026 | ROD1     | 0.048 |
| 1531 | SOX12      | 0.016 | UFD1L    | 0.026 | PTPN23   | 0.048 |
| 1532 | NBEAL2     | 0.016 | ROMO1    | 0.026 | PDS5B    | 0.048 |
| 1533 | KIAA0141   | 0.016 | SGSH     | 0.026 | TRMT1    | 0.048 |
| 1534 | C14orf149  | 0.016 | CCR9     | 0.026 | ACO2     | 0.048 |
| 1535 | GRAP2      | 0.016 | PSMD8    | 0.026 | SMYD2    | 0.048 |
| 1536 | PACSIN2    | 0.016 | SPN      | 0.026 | SRSF6    | 0.048 |
| 1537 | MED23      | 0.016 | POMP     | 0.026 | MAPK9    | 0.048 |
| 1538 | RECK       | 0.016 | ZNF333   | 0.026 | C21orf91 | 0.048 |
| 1539 | CYP2U1     | 0.016 | CYBA     | 0.026 | ALKBH4   | 0.048 |
| 1540 | RNF135     | 0.016 | DPPA4    | 0.026 | GOLPH3L  | 0.048 |
| 1541 | EIF2AK2    | 0.016 | FAM117A  | 0.026 | ANK3     | 0.048 |
| 1542 | POMP       | 0.016 | CDC14A   | 0.026 | CHIC1    | 0.048 |
| 1543 | AQP3       | 0.016 | YLPM1    | 0.026 | PPP1CC   | 0.048 |
| 1544 | SSBP2      | 0.016 | NEK6     | 0.026 | RFX1     | 0.048 |

|      |              |       |           |       |              |       |
|------|--------------|-------|-----------|-------|--------------|-------|
| 1545 | CLK2         | 0.016 | GAS6      | 0.026 | MBTD1        | 0.048 |
| 1546 | IFNGR1       | 0.016 | TMEM80    | 0.026 | ZER1         | 0.048 |
| 1547 | PBX2         | 0.016 | ZNF23     | 0.026 | SLC39A8      | 0.048 |
| 1548 | HNRNPH3      | 0.016 | RSBN1     | 0.026 | IRAK1        | 0.048 |
| 1549 | SDF4         | 0.016 | MPV17L2   | 0.026 | CEP350       | 0.048 |
| 1550 | CTSH         | 0.016 | UPP1      | 0.026 | CPEB3        | 0.048 |
| 1551 | ZNF70        | 0.016 | CTBS      | 0.026 | BRCA2        | 0.048 |
| 1552 | PHF11        | 0.016 | C7orf41   | 0.026 | GNA12        | 0.048 |
| 1553 | RPS6KA2      | 0.016 | ADD2      | 0.026 | PSEN1        | 0.048 |
| 1554 | YPEL3        | 0.016 | TANC2     | 0.026 | CCDC59       | 0.048 |
| 1555 | PRDM2        | 0.016 | ZBTB43    | 0.026 | CCDC76       | 0.048 |
| 1556 | SETD2        | 0.016 | PDCD6IP   | 0.027 | CBFB         | 0.048 |
| 1557 | DCAF15       | 0.016 | CDC34     | 0.027 | PITPNM1      | 0.048 |
| 1558 | ELOVL5       | 0.016 | ZNF468    | 0.027 | XPO4         | 0.048 |
| 1559 | ARRB2        | 0.016 | EIF2C4    | 0.027 | TROVE2       | 0.048 |
| 1560 | NICN1        | 0.016 | MTFP1     | 0.027 | ATHL1        | 0.048 |
| 1561 | ATG5         | 0.016 | ZNF84     | 0.027 | C19orf20     | 0.048 |
| 1562 | PINK1        | 0.016 | PTPRS     | 0.027 | IMPA1        | 0.048 |
| 1563 | DENND5A      | 0.016 | FBXL5     | 0.027 | BRCC3        | 0.048 |
| 1564 | TBC1D1       | 0.016 | LY6E      | 0.027 | ZDHHC8       | 0.049 |
| 1565 | ZNF238       | 0.016 | TCTN1     | 0.027 | MFGE8        | 0.049 |
| 1566 | BZW1         | 0.016 | ANKRD26   | 0.027 | LIPE         | 0.049 |
| 1567 | POLR3GL      | 0.016 | TXN       | 0.027 | RNF138       | 0.049 |
| 1568 | MED22        | 0.016 | EAF2      | 0.027 | PARD6A       | 0.049 |
| 1569 | MGEA5        | 0.016 | KIF3C     | 0.027 | SLC25A42     | 0.049 |
| 1570 | RANBP10      | 0.016 | ZNF558    | 0.027 | SH3GLB1      | 0.049 |
| 1571 | CD72         | 0.016 | ANO6      | 0.027 | IBTK         | 0.049 |
| 1572 | BACH2        | 0.016 | ZNF138    | 0.027 | TFR2         | 0.049 |
| 1573 | C17orf91     | 0.016 | HSD17B11  | 0.027 | SLC12A7      | 0.049 |
| 1574 | BRD4         | 0.016 | ICAM4     | 0.027 | KANK3        | 0.049 |
| 1575 | AHSA2        | 0.016 | DPM2      | 0.027 | WASH2P       | 0.049 |
| 1576 | EDEM3        | 0.016 | BAK1      | 0.027 | PCYT2        | 0.049 |
| 1577 | FAM160A2     | 0.016 | ZNF471    | 0.027 | LOC100132356 | 0.049 |
| 1578 | B3GNT7       | 0.016 | ZNF550    | 0.027 | CORO7        | 0.049 |
| 1579 | ZNF816       | 0.016 | RNF219    | 0.027 | CD82         | 0.049 |
| 1580 | SIX5         | 0.016 | IKBKB     | 0.027 | CTSD         | 0.049 |
| 1581 | LOC100134229 | 0.016 | BCL9L     | 0.027 | GLI4         | 0.049 |
| 1582 | ADAT2        | 0.016 | DPH5      | 0.027 | CHAD         | 0.049 |
| 1583 | STAT5A       | 0.016 | STARD9    | 0.027 | DENND1B      | 0.049 |
| 1584 | CTC1         | 0.016 | MMP17     | 0.027 | AZI2         | 0.049 |
| 1585 | SYPL1        | 0.016 | MYLIP     | 0.027 | KIAA0196     | 0.049 |
| 1586 | KDSR         | 0.016 | CYB5R3    | 0.027 | SEC61B       | 0.049 |
| 1587 | COX6C        | 0.016 | CD82      | 0.027 | USP19        | 0.049 |
| 1588 | WNT4         | 0.016 | FAM111A   | 0.027 | L3MBTL3      | 0.049 |
| 1589 | C20orf7      | 0.016 | HIC2      | 0.027 | ELL          | 0.050 |
| 1590 | INF2         | 0.016 | IPO11     | 0.027 | FERMT3       | 0.050 |
| 1591 | ZNF594       | 0.016 | BLZF1     | 0.027 | SNORA8       | 0.050 |
| 1592 | ZFP28        | 0.016 | NDUFA8    | 0.027 | LRRC40       | 0.050 |
| 1593 | C19orf6      | 0.016 | SYNM      | 0.027 | PSMB10       | 0.050 |
| 1594 | WASF2        | 0.016 | FLYWCH1   | 0.028 | SNAP23       | 0.050 |
| 1595 | CUL9         | 0.016 | PFKFB2    | 0.028 | BBIP1        | 0.050 |
| 1596 | HSD17B10     | 0.016 | SLC46A3   | 0.028 | DDX11        | 0.050 |
| 1597 | PEAK1        | 0.016 | AMN1      | 0.028 | GOPC         | 0.050 |
| 1598 | NRF1         | 0.016 | KIAA0090  | 0.028 | KRCC1        | 0.050 |
| 1599 | FAM110A      | 0.016 | PHF1      | 0.028 | ARSA         | 0.050 |
| 1600 | TRIM33       | 0.016 | CHP       | 0.028 | DYNLL1       | 0.050 |
| 1601 | NEMF         | 0.016 | OSGEP     | 0.028 | CDC73        | 0.050 |
| 1602 | SLC3A2       | 0.016 | PTGS1     | 0.028 | SCYL2        | 0.050 |
| 1603 | RGL2         | 0.016 | KDM4B     | 0.028 | TRAPPC5      | 0.050 |
| 1604 | MYST3        | 0.016 | SLC35C1   | 0.028 |              |       |
| 1605 | WDR47        | 0.016 | C19orf24  | 0.028 |              |       |
| 1606 | ASAH1        | 0.016 | GOPC      | 0.028 |              |       |
| 1607 | WDR82        | 0.016 | ZNF343    | 0.028 |              |       |
| 1608 | IARS         | 0.016 | AHCYL2    | 0.028 |              |       |
| 1609 | GCN1L1       | 0.016 | RIN3      | 0.028 |              |       |
| 1610 | LRRC8C       | 0.016 | ANKRD37   | 0.028 |              |       |
| 1611 | CEP135       | 0.016 | SNRPG     | 0.028 |              |       |
| 1612 | MYST1        | 0.016 | RFT1      | 0.028 |              |       |
| 1613 | FAM116B      | 0.016 | EPC1      | 0.028 |              |       |
| 1614 | NSUN5        | 0.016 | LMNA      | 0.028 |              |       |
| 1615 | WDR5B        | 0.016 | BEX2      | 0.028 |              |       |
| 1616 | FAM111A      | 0.016 | UFC1      | 0.028 |              |       |
| 1617 | FAM84B       | 0.016 | C7orf43   | 0.028 |              |       |
| 1618 | TREML2       | 0.016 | TNFRSF10B | 0.028 |              |       |
| 1619 | REC8         | 0.016 | ACAT1     | 0.028 |              |       |
| 1620 | CCDC130      | 0.016 | STRADB    | 0.029 |              |       |
| 1621 | FAM102A      | 0.016 | HLA-DPB1  | 0.029 |              |       |
| 1622 | STK11IP      | 0.016 | C2orf68   | 0.029 |              |       |

|      |              |       |           |       |
|------|--------------|-------|-----------|-------|
| 1623 | TXNRD1       | 0.016 | IFT74     | 0.029 |
| 1624 | WDR11        | 0.016 | MBTD1     | 0.029 |
| 1625 | TSPAN13      | 0.016 | CTSC      | 0.029 |
| 1626 | NR1H2        | 0.016 | ARSB      | 0.029 |
| 1627 | ZNF420       | 0.016 | ZFAT      | 0.029 |
| 1628 | EIF2A        | 0.016 | RNF144B   | 0.029 |
| 1629 | C6orf211     | 0.016 | AXIN1     | 0.029 |
| 1630 | LIG4         | 0.016 | MAP3K14   | 0.029 |
| 1631 | BRD3         | 0.016 | ZNF137P   | 0.029 |
| 1632 | SMURF1       | 0.016 | NR3C1     | 0.029 |
| 1633 | ZNF493       | 0.016 | FADS3     | 0.029 |
| 1634 | CCDC9        | 0.016 | FCER2     | 0.029 |
| 1635 | SSH2         | 0.016 | ZSWIM7    | 0.029 |
| 1636 | WWC3         | 0.016 | RHOC      | 0.029 |
| 1637 | MIXL1        | 0.016 | ZBTB39    | 0.029 |
| 1638 | C20orf103    | 0.016 | ZXDB      | 0.029 |
| 1639 | TBC1D5       | 0.016 | PRPS2     | 0.029 |
| 1640 | B4GALT1      | 0.016 | SYNPO     | 0.029 |
| 1641 | MAGEE1       | 0.016 | SNX18     | 0.029 |
| 1642 | SH2D3A       | 0.016 | DCLRE1C   | 0.029 |
| 1643 | RPS6KA3      | 0.016 | ZNF528    | 0.029 |
| 1644 | SCN3A        | 0.016 | NDUFS2    | 0.029 |
| 1645 | ASRGL1       | 0.016 | DUSP3     | 0.029 |
| 1646 | SH3BP2       | 0.016 | MCOLN2    | 0.029 |
| 1647 | SCAF11       | 0.016 | MAPK3     | 0.029 |
| 1648 | SLC9A3R1     | 0.016 | ZNF783    | 0.029 |
| 1649 | AIFM1        | 0.016 | PCNXL2    | 0.029 |
| 1650 | NSUN5P2      | 0.016 | EYA3      | 0.029 |
| 1651 | C2orf68      | 0.016 | GNG11     | 0.030 |
| 1652 | RFX7         | 0.016 | ADI1      | 0.030 |
| 1653 | DNMBP        | 0.016 | ZMIZ2     | 0.030 |
| 1654 | NENF         | 0.016 | LGALS8    | 0.030 |
| 1655 | SLC25A4      | 0.016 | CDK19     | 0.030 |
| 1656 | GTF2A1       | 0.016 | ZNF510    | 0.030 |
| 1657 | GOLIM4       | 0.016 | HLA-DQA1  | 0.030 |
| 1658 | SH3YL1       | 0.016 | MPEG1     | 0.030 |
| 1659 | ZFP3         | 0.016 | MCL1      | 0.030 |
| 1660 | LRPPRC       | 0.016 | ATXN7L1   | 0.030 |
| 1661 | PTPRCAP      | 0.016 | IGHA2     | 0.030 |
| 1662 | CAMK2D       | 0.016 | IFI27L2   | 0.030 |
| 1663 | NDUFS1       | 0.017 | MYH3      | 0.030 |
| 1664 | DDX6         | 0.017 | PAWR      | 0.030 |
| 1665 | LOC100129034 | 0.017 | IL24      | 0.030 |
| 1666 | ELL3         | 0.017 | ZNF362    | 0.030 |
| 1667 | NARG2        | 0.017 | WDR52     | 0.030 |
| 1668 | MTERFD2      | 0.017 | LCN10     | 0.030 |
| 1669 | SKA3         | 0.017 | ZNF252    | 0.030 |
| 1670 | CNR2         | 0.017 | GLRX5     | 0.031 |
| 1671 | CCNG2        | 0.017 | ZNF706    | 0.031 |
| 1672 | PRR13        | 0.017 | ZNF836    | 0.031 |
| 1673 | LIMS2        | 0.017 | MYO1E     | 0.031 |
| 1674 | SLC31A1      | 0.017 | SLC12A7   | 0.031 |
| 1675 | APLP2        | 0.017 | QRSL1     | 0.031 |
| 1676 | TMEM173      | 0.017 | RWDD3     | 0.031 |
| 1677 | MAP3K11      | 0.017 | PSMD14    | 0.031 |
| 1678 | VASP         | 0.017 | APH1B     | 0.031 |
| 1679 | RXRB         | 0.017 | COX6A1    | 0.031 |
| 1680 | TP73         | 0.017 | ZNF512    | 0.031 |
| 1681 | KIF13B       | 0.017 | TRIM69    | 0.031 |
| 1682 | ATAT1        | 0.017 | CREBBP    | 0.031 |
| 1683 | PATL2        | 0.017 | HHEX      | 0.031 |
| 1684 | CCDC85B      | 0.017 | C16orf62  | 0.031 |
| 1685 | TFDP2        | 0.017 | CLIP2     | 0.031 |
| 1686 | PDLIM2       | 0.017 | STAT4     | 0.031 |
| 1687 | CAPN3        | 0.017 | GGH       | 0.031 |
| 1688 | PGLS         | 0.017 | ZFP90     | 0.031 |
| 1689 | TMEM33       | 0.017 | NOM1      | 0.031 |
| 1690 | HEATR5B      | 0.017 | ESR1      | 0.031 |
| 1691 | MRPS25       | 0.017 | NDUFS3    | 0.031 |
| 1692 | KIAA1683     | 0.017 | FANCD2    | 0.031 |
| 1693 | ZNF138       | 0.017 | GGA3      | 0.031 |
| 1694 | PDCD6IP      | 0.017 | RUNDC2C   | 0.031 |
| 1695 | ATP5H        | 0.017 | CD24      | 0.031 |
| 1696 | POLRMT       | 0.017 | LOC283194 | 0.031 |
| 1697 | KIFAP3       | 0.017 | GCA       | 0.032 |
| 1698 | EMG1         | 0.017 | ZNF358    | 0.032 |
| 1699 | MAML1        | 0.017 | C11orf21  | 0.032 |
| 1700 | PAN2         | 0.017 | C22orf39  | 0.032 |

|      |          |       |              |       |
|------|----------|-------|--------------|-------|
| 1701 | DCAF17   | 0.017 | TRADD        | 0.032 |
| 1702 | D2HGDH   | 0.017 | MRPL3        | 0.032 |
| 1703 | SDK2     | 0.017 | CSNK1G2      | 0.032 |
| 1704 | OFD1     | 0.017 | C20orf195    | 0.032 |
| 1705 | KIAA2026 | 0.017 | IFITM1       | 0.032 |
| 1706 | ZNF107   | 0.017 | TUBE1        | 0.032 |
| 1707 | ZNF167   | 0.017 | TXNDC12      | 0.032 |
| 1708 | CORO1A   | 0.017 | GBP4         | 0.032 |
| 1709 | UHMK1    | 0.017 | ARHGAP18     | 0.032 |
| 1710 | TP53I13  | 0.017 | RLIM         | 0.032 |
| 1711 | LMO4     | 0.017 | ZNF507       | 0.032 |
| 1712 | IKBKB    | 0.017 | SRGAP3       | 0.032 |
| 1713 | WHAMM    | 0.017 | CASP2        | 0.032 |
| 1714 | PHF1     | 0.017 | MET          | 0.032 |
| 1715 | NAAA     | 0.017 | LOC100132356 | 0.032 |
| 1716 | INTS2    | 0.017 | OXCT2        | 0.032 |
| 1717 | TRIM14   | 0.017 | SLA          | 0.032 |
| 1718 | ORAOV1   | 0.017 | NETO1        | 0.032 |
| 1719 | RBM12B   | 0.017 | GALE         | 0.032 |
| 1720 | NAP1L1   | 0.017 | TMEM156      | 0.032 |
| 1721 | ANO9     | 0.017 | CCNG2        | 0.032 |
| 1722 | TCEA2    | 0.017 | C2orf56      | 0.032 |
| 1723 | PCCA     | 0.017 | CSRP2BP      | 0.032 |
| 1724 | CLPX     | 0.017 | ZNF382       | 0.032 |
| 1725 | KIAA0494 | 0.017 | ABTB1        | 0.032 |
| 1726 | POLD4    | 0.017 | NENF         | 0.032 |
| 1727 | GBF1     | 0.017 | P2RX4        | 0.032 |
| 1728 | MBLAC2   | 0.017 | AUTS2        | 0.033 |
| 1729 | PPA1     | 0.017 | RTCD1        | 0.033 |
| 1730 | SEPHS1   | 0.017 | KLF9         | 0.033 |
| 1731 | SFT2D3   | 0.017 | SCAND2       | 0.033 |
| 1732 | SLC25A46 | 0.017 | SIAH2        | 0.033 |
| 1733 | SGSH     | 0.017 | COX8A        | 0.033 |
| 1734 | FIG4     | 0.017 | PSMB3        | 0.033 |
| 1735 | ANAPC5   | 0.017 | RRP36        | 0.033 |
| 1736 | SLC2A6   | 0.017 | FZD3         | 0.033 |
| 1737 | FAM108B1 | 0.017 | ZDHHC14      | 0.033 |
| 1738 | CD6      | 0.017 | ERH          | 0.033 |
| 1739 | CNO      | 0.017 | GIPR         | 0.033 |
| 1740 | MAX      | 0.017 | YPEL2        | 0.033 |
| 1741 | EIF4A2   | 0.017 | PPFIBP1      | 0.033 |
| 1742 | NBPF9    | 0.017 | MYL6B        | 0.033 |
| 1743 | RAB7L1   | 0.017 | REXO2        | 0.033 |
| 1744 | SH3BGRL3 | 0.017 | TP63         | 0.033 |
| 1745 | TBC1D19  | 0.017 | EIF2B3       | 0.034 |
| 1746 | ORAI1    | 0.017 | FCGBP        | 0.034 |
| 1747 | HGSNAT   | 0.017 | FAM160B2     | 0.034 |
| 1748 | FAM122B  | 0.017 | TSTA3        | 0.034 |
| 1749 | KDM3B    | 0.017 | STARD8       | 0.034 |
| 1750 | ZC3H4    | 0.017 | PRNP         | 0.034 |
| 1751 | MYL6     | 0.017 | ZNF229       | 0.034 |
| 1752 | ZNF701   | 0.017 | C14orf101    | 0.034 |
| 1753 | SEPN1    | 0.017 | TUFM         | 0.034 |
| 1754 | ZER1     | 0.017 | MRPS18A      | 0.034 |
| 1755 | SMC4     | 0.017 | FBLN2        | 0.034 |
| 1756 | EIF2C4   | 0.017 | CLYBL        | 0.034 |
| 1757 | CLPTM1   | 0.017 | ERO1L        | 0.034 |
| 1758 | UFD1L    | 0.017 | ANKRD46      | 0.034 |
| 1759 | KCTD1    | 0.017 | CD63         | 0.034 |
| 1760 | PAQR8    | 0.017 | SAMD4A       | 0.034 |
| 1761 | KIAA0090 | 0.017 | SUCLA2       | 0.034 |
| 1762 | PFKL     | 0.017 | PRKRIR       | 0.034 |
| 1763 | MED29    | 0.017 | CINP         | 0.034 |
| 1764 | SNN      | 0.017 | BPGM         | 0.034 |
| 1765 | TRIM68   | 0.017 | VEGFB        | 0.034 |
| 1766 | FAM159A  | 0.017 | TBC1D4       | 0.034 |
| 1767 | LINGO3   | 0.017 | PSMC1        | 0.034 |
| 1768 | PSMA1    | 0.017 | DSP          | 0.034 |
| 1769 | CHD6     | 0.017 | ARHGAP31     | 0.034 |
| 1770 | ANKMY1   | 0.017 | CTC1         | 0.034 |
| 1771 | ATHL1    | 0.017 | SERPINF1     | 0.035 |
| 1772 | RPS19BP1 | 0.017 | CD151        | 0.035 |
| 1773 | PEX5     | 0.017 | SLC41A2      | 0.035 |
| 1774 | MTA1     | 0.017 | OASL         | 0.035 |
| 1775 | CD200    | 0.017 | LOC100130950 | 0.035 |
| 1776 | FGD4     | 0.017 | DFNB31       | 0.035 |
| 1777 | COQ5     | 0.017 | ZNF667       | 0.035 |
| 1778 | RALGPS1  | 0.017 | CAMLG        | 0.035 |

|      |              |       |          |       |
|------|--------------|-------|----------|-------|
| 1779 | C3orf47      | 0.017 | TMEM126A | 0.035 |
| 1780 | HMOX1        | 0.017 | UST      | 0.035 |
| 1781 | GTF3C6       | 0.017 | EPC2     | 0.035 |
| 1782 | UBE2V2       | 0.017 | OTUD7B   | 0.035 |
| 1783 | KIFC2        | 0.017 | ANO9     | 0.035 |
| 1784 | FO XK1       | 0.017 | TET3     | 0.035 |
| 1785 | ATP5C1       | 0.017 | KCNN4    | 0.035 |
| 1786 | GPR160       | 0.017 | EMG1     | 0.035 |
| 1787 | SLC29A2      | 0.017 | SRSF10   | 0.035 |
| 1788 | SCYL1        | 0.017 | PVT1     | 0.035 |
| 1789 | TTYH3        | 0.017 | LHFPL2   | 0.035 |
| 1790 | RAB27A       | 0.017 | FBXO11   | 0.035 |
| 1791 | ATP6V1D      | 0.017 | CWC22    | 0.035 |
| 1792 | RHOC         | 0.017 | RPS27L   | 0.035 |
| 1793 | XYL T1       | 0.017 | EPSTI1   | 0.035 |
| 1794 | ABCB9        | 0.017 | COG6     | 0.035 |
| 1795 | FASTKD1      | 0.017 | SLC25A22 | 0.035 |
| 1796 | MAML2        | 0.017 | ZBTB80S  | 0.035 |
| 1797 | CNN2         | 0.017 | ZNF267   | 0.035 |
| 1798 | NSUN5P1      | 0.017 | PSMD7    | 0.035 |
| 1799 | ARHGAP24     | 0.017 | CPD      | 0.035 |
| 1800 | NDUFA13      | 0.017 | BTBD2    | 0.035 |
| 1801 | NAA50        | 0.017 | TCTN3    | 0.035 |
| 1802 | FYN          | 0.017 | APLP2    | 0.035 |
| 1803 | HPS1         | 0.017 | PARVG    | 0.035 |
| 1804 | ASCC3        | 0.017 | SOBP     | 0.035 |
| 1805 | UNC93B1      | 0.017 | AKAP11   | 0.035 |
| 1806 | HIBCH        | 0.017 | CENPC1   | 0.036 |
| 1807 | MIIP         | 0.017 | SERPINB1 | 0.036 |
| 1808 | ABCD2        | 0.017 | RLF      | 0.036 |
| 1809 | MS4A14       | 0.017 | PPP4R1   | 0.036 |
| 1810 | LLGL1        | 0.017 | RYK      | 0.036 |
| 1811 | OSBP         | 0.017 | TECPR2   | 0.036 |
| 1812 | PLCD1        | 0.017 | JHDM1D   | 0.036 |
| 1813 | FNBP4        | 0.017 | NPHP3    | 0.036 |
| 1814 | UQCRQ        | 0.017 | SKP2     | 0.036 |
| 1815 | LOC730101    | 0.017 | STAP1    | 0.036 |
| 1816 | CXCR3        | 0.017 | MYO6     | 0.036 |
| 1817 | POLG         | 0.017 | HEXIM2   | 0.036 |
| 1818 | PEBP1        | 0.017 | CDK13    | 0.036 |
| 1819 | ITGB2        | 0.017 | ZNF681   | 0.036 |
| 1820 | CINP         | 0.017 | C15orf24 | 0.036 |
| 1821 | PRMT2        | 0.017 | INO80    | 0.037 |
| 1822 | SRSF5        | 0.017 | HLA-DRB1 | 0.037 |
| 1823 | C12orf51     | 0.017 | EML2     | 0.037 |
| 1824 | RHOH         | 0.017 | PSMA2    | 0.037 |
| 1825 | PRPF3        | 0.017 | RHOQ     | 0.037 |
| 1826 | CRLS1        | 0.017 | ZNF518A  | 0.037 |
| 1827 | CENPF        | 0.017 | TFDP2    | 0.037 |
| 1828 | PARP2        | 0.017 | USP53    | 0.037 |
| 1829 | 41342.000    | 0.017 | FH       | 0.037 |
| 1830 | UQC RF51     | 0.017 | SRRM2    | 0.037 |
| 1831 | ZC3H12D      | 0.017 | ZNF829   | 0.037 |
| 1832 | IL7          | 0.017 | PSMA5    | 0.037 |
| 1833 | ZFC3H1       | 0.017 | SYT17    | 0.037 |
| 1834 | C18orf8      | 0.017 | ZNF789   | 0.037 |
| 1835 | UBXN8        | 0.017 | DYRK1A   | 0.037 |
| 1836 | RBAK         | 0.017 | MFS D4   | 0.037 |
| 1837 | HMMR         | 0.017 | ATF1     | 0.037 |
| 1838 | LY86         | 0.017 | GOT1     | 0.037 |
| 1839 | LPGAT1       | 0.017 | KIAA0240 | 0.037 |
| 1840 | KCTD7        | 0.017 | ARNTL2   | 0.037 |
| 1841 | PKIG         | 0.017 | ITPR1P2  | 0.037 |
| 1842 | DPM2         | 0.017 | HGSNAT   | 0.037 |
| 1843 | ICAM3        | 0.017 | INO80E   | 0.037 |
| 1844 | ITPR3        | 0.017 | HIBCH    | 0.037 |
| 1845 | SIAE         | 0.017 | BCAR3    | 0.038 |
| 1846 | TBC1D7       | 0.017 | SEPN1    | 0.038 |
| 1847 | ING4         | 0.017 | OR13A1   | 0.038 |
| 1848 | C6orf120     | 0.017 | EIF3J    | 0.038 |
| 1849 | SRXN1        | 0.017 | UFM1     | 0.038 |
| 1850 | TTC14        | 0.017 | KAT2A    | 0.038 |
| 1851 | TANC2        | 0.017 | FAM13B   | 0.038 |
| 1852 | PNRC1        | 0.017 | AKT3     | 0.038 |
| 1853 | ZEB2         | 0.017 | TCEAL4   | 0.038 |
| 1854 | ZBTB33       | 0.017 | FBXO6    | 0.038 |
| 1855 | LOC100129550 | 0.017 | SESTD1   | 0.038 |
| 1856 | ZNF542       | 0.017 | LDLRAP1  | 0.038 |

|      |            |       |           |       |
|------|------------|-------|-----------|-------|
| 1857 | GAS6       | 0.017 | C12orf44  | 0.038 |
| 1858 | TMEM71     | 0.017 | SP140L    | 0.038 |
| 1859 | C1R        | 0.017 | BMP6      | 0.038 |
| 1860 | C17orf85   | 0.017 | NXF1      | 0.038 |
| 1861 | STK24      | 0.017 | CLCN7     | 0.038 |
| 1862 | CAND1      | 0.017 | OGFRL1    | 0.038 |
| 1863 | ZNF557     | 0.017 | DUSP22    | 0.038 |
| 1864 | SPECC1L    | 0.017 | AKAP10    | 0.038 |
| 1865 | ANAPC4     | 0.017 | ZDHHC12   | 0.038 |
| 1866 | ZNF524     | 0.017 | NUP88     | 0.038 |
| 1867 | SHISA5     | 0.017 | GPSM3     | 0.038 |
| 1868 | PARP12     | 0.017 | ATP5B     | 0.038 |
| 1869 | ZNF687     | 0.017 | NAGA      | 0.038 |
| 1870 | CDKN3      | 0.017 | MRPS11    | 0.038 |
| 1871 | TMOD2      | 0.017 | PAN2      | 0.038 |
| 1872 | PAQR6      | 0.017 | LRRC1     | 0.038 |
| 1873 | TNK2       | 0.017 | PLAGL1    | 0.038 |
| 1874 | AGRN       | 0.017 | LSM1      | 0.038 |
| 1875 | GRIPAP1    | 0.017 | HERC4     | 0.038 |
| 1876 | SPTBN2     | 0.017 | TAGAP     | 0.038 |
| 1877 | ZNF385A    | 0.017 | KIAA1377  | 0.038 |
| 1878 | CREG1      | 0.017 | SUPT3H    | 0.038 |
| 1879 | NCRNA00201 | 0.017 | FAM175A   | 0.038 |
| 1880 | TMEM63A    | 0.017 | SIDT2     | 0.038 |
| 1881 | ELMOD3     | 0.017 | ANUBL1    | 0.038 |
| 1882 | RDH10      | 0.017 | DPM3      | 0.038 |
| 1883 | RNF10      | 0.017 | C1orf63   | 0.038 |
| 1884 | DEPDC1     | 0.017 | RNF125    | 0.038 |
| 1885 | GALNT7     | 0.017 | LRCH1     | 0.038 |
| 1886 | PGS1       | 0.017 | GIGYF1    | 0.038 |
| 1887 | CTNNA1     | 0.017 | YIPF1     | 0.038 |
| 1888 | ATP1B3     | 0.017 | DDX1      | 0.039 |
| 1889 | RDX        | 0.017 | MTERFD2   | 0.039 |
| 1890 | FAM109A    | 0.017 | PARP15    | 0.039 |
| 1891 | CHEK1      | 0.017 | SCN4A     | 0.039 |
| 1892 | ZNF26      | 0.017 | RAI1      | 0.039 |
| 1893 | MAGED2     | 0.017 | THNSL2    | 0.039 |
| 1894 | HS2ST1     | 0.017 | FASTKD2   | 0.039 |
| 1895 | ZNF317     | 0.017 | SP4       | 0.039 |
| 1896 | ZNF706     | 0.018 | KLHL24    | 0.039 |
| 1897 | ZFP14      | 0.018 | TRAF3IP1  | 0.039 |
| 1898 | ZNF441     | 0.018 | RETSAT    | 0.039 |
| 1899 | TMEM126B   | 0.018 | ORMDL2    | 0.039 |
| 1900 | FAM178A    | 0.018 | PIAS2     | 0.039 |
| 1901 | NXF1       | 0.018 | ACAP2     | 0.039 |
| 1902 | CNPY2      | 0.018 | MANBAL    | 0.039 |
| 1903 | BLOC1S2    | 0.018 | KCTD7     | 0.039 |
| 1904 | SNHG1      | 0.018 | NOL7      | 0.039 |
| 1905 | SMARCA2    | 0.018 | RNF146    | 0.039 |
| 1906 | RPL26L1    | 0.018 | RBKS      | 0.039 |
| 1907 | FCRL1      | 0.018 | ZNF736    | 0.039 |
| 1908 | SIGLEC14   | 0.018 | STX16     | 0.039 |
| 1909 | NDUFB4     | 0.018 | TNRC6C    | 0.039 |
| 1910 | NR3C1      | 0.018 | CROCCP3   | 0.039 |
| 1911 | MCF2L      | 0.018 | KIAA0355  | 0.039 |
| 1912 | IL27RA     | 0.018 | ATP5G3    | 0.039 |
| 1913 | PYGB       | 0.018 | GCNT2     | 0.039 |
| 1914 | GPSM3      | 0.018 | BACE2     | 0.040 |
| 1915 | TRIM22     | 0.018 | SLC6A6    | 0.040 |
| 1916 | YPEL1      | 0.018 | GLT25D1   | 0.040 |
| 1917 | DVL1       | 0.018 | RPAIN     | 0.040 |
| 1918 | AHDC1      | 0.018 | ZBTB10    | 0.040 |
| 1919 | MFSD10     | 0.018 | UTP3      | 0.040 |
| 1920 | RHOG       | 0.018 | LRRK2     | 0.040 |
| 1921 | BTN2A2     | 0.018 | SLC25A15  | 0.040 |
| 1922 | NECAP2     | 0.018 | WSCD2     | 0.040 |
| 1923 | NNT        | 0.018 | CLPB      | 0.040 |
| 1924 | ZNF592     | 0.018 | SLC23A2   | 0.040 |
| 1925 | TGFBR2     | 0.018 | GAMT      | 0.040 |
| 1926 | TMX1       | 0.018 | TNFRSF10D | 0.040 |
| 1927 | ITCH       | 0.018 | BTG1      | 0.040 |
| 1928 | GPR65      | 0.018 | FLJ43663  | 0.040 |
| 1929 | LOC25845   | 0.018 | COX7A2L   | 0.040 |
| 1930 | SP1        | 0.018 | DYNLT3    | 0.040 |
| 1931 | SNHG7      | 0.018 | FANCG     | 0.040 |
| 1932 | RAF1       | 0.018 | NOXA1     | 0.040 |
| 1933 | C1orf55    | 0.018 | ZNF770    | 0.040 |
| 1934 | PILRB      | 0.018 | CMTM3     | 0.040 |

|      |               |       |              |       |
|------|---------------|-------|--------------|-------|
| 1935 | DTX3L         | 0.018 | PTAR1        | 0.040 |
| 1936 | EDF1          | 0.018 | MPHOSPH8     | 0.040 |
| 1937 | ZFP161        | 0.018 | YIPF6        | 0.040 |
| 1938 | CXorf23       | 0.018 | ZAK          | 0.040 |
| 1939 | GPRASP1       | 0.018 | UBE2L6       | 0.040 |
| 1940 | HYI           | 0.018 | IL21R        | 0.041 |
| 1941 | NDUFB2        | 0.018 | KRBA1        | 0.041 |
| 1942 | PPFIBP1       | 0.018 | ATPIF1       | 0.041 |
| 1943 | CAPRIN2       | 0.018 | LOC150776    | 0.041 |
| 1944 | IL6R          | 0.018 | TLR4         | 0.041 |
| 1945 | LSM5          | 0.018 | NDUFB6       | 0.041 |
| 1946 | RNF220        | 0.018 | SNX1         | 0.041 |
| 1947 | ITGB1         | 0.018 | PAPOLG       | 0.041 |
| 1948 | STX16         | 0.018 | LRRC61       | 0.041 |
| 1949 | KRBA2         | 0.018 | NUP35        | 0.041 |
| 1950 | SEC23A        | 0.018 | MAP3K8       | 0.041 |
| 1951 | NTAN1         | 0.018 | APOL3        | 0.041 |
| 1952 | C6orf115      | 0.018 | GSTT1        | 0.041 |
| 1953 | AP1G2         | 0.018 | ECI2         | 0.041 |
| 1954 | TSPYL2        | 0.018 | GAS7         | 0.041 |
| 1955 | ANKLE2        | 0.018 | USP13        | 0.041 |
| 1956 | PLEKHH3       | 0.018 | ABCA1        | 0.041 |
| 1957 | LOC100131067  | 0.018 | ADCY7        | 0.041 |
| 1958 | UNK           | 0.018 | PIK3C2A      | 0.041 |
| 1959 | SRM           | 0.018 | KIAA1244     | 0.041 |
| 1960 | PGBD2         | 0.018 | FOXP4        | 0.041 |
| 1961 | TMEM133       | 0.018 | RINT1        | 0.041 |
| 1962 | CRELD2        | 0.018 | C6orf145     | 0.041 |
| 1963 | P2RX5-TAX1BP3 | 0.018 | EZH1         | 0.041 |
| 1964 | VPS13C        | 0.018 | UGDH         | 0.041 |
| 1965 | C14orf181     | 0.018 | LOC100134229 | 0.041 |
| 1966 | LOC284749     | 0.018 | NEDD4L       | 0.041 |
| 1967 | DGKA          | 0.018 | ADAP2        | 0.041 |
| 1968 | SUMF1         | 0.018 | NFYB         | 0.041 |
| 1969 | NBPF1         | 0.018 | LOC220906    | 0.041 |
| 1970 | TESK2         | 0.018 | ORAI3        | 0.041 |
| 1971 | PSMB6         | 0.018 | EIF5A        | 0.042 |
| 1972 | NRBP1         | 0.018 | ALG3         | 0.042 |
| 1973 | SMAD4         | 0.018 | COMMD1       | 0.042 |
| 1974 | USF2          | 0.018 | CLK2         | 0.042 |
| 1975 | SGK223        | 0.018 | GAB3         | 0.042 |
| 1976 | ATP11B        | 0.018 | C19orf38     | 0.042 |
| 1977 | RWDD1         | 0.018 | C16orf91     | 0.042 |
| 1978 | 41526.000     | 0.018 | FAM98B       | 0.042 |
| 1979 | ATP5B         | 0.018 | TBL1X        | 0.042 |
| 1980 | RBMS1         | 0.018 | POLR3D       | 0.042 |
| 1981 | TRAF4         | 0.018 | DENR         | 0.042 |
| 1982 | RAP1GAP2      | 0.018 | PKD3         | 0.042 |
| 1983 | CEP120        | 0.018 | HBS1L        | 0.042 |
| 1984 | SETDB1        | 0.018 | EPHX1        | 0.042 |
| 1985 | RWDD2A        | 0.018 | ANKRA2       | 0.042 |
| 1986 | NDUFAB1       | 0.018 | CEP192       | 0.042 |
| 1987 | WBSR22        | 0.018 | USP44        | 0.042 |
| 1988 | MBD4          | 0.018 | ACSL3        | 0.042 |
| 1989 | APOL2         | 0.018 | SLC25A37     | 0.042 |
| 1990 | KIAA0430      | 0.018 | VPS41        | 0.042 |
| 1991 | ABHD5         | 0.018 | NDUFB11      | 0.042 |
| 1992 | SLC12A7       | 0.018 | PRMT1        | 0.042 |
| 1993 | SLC30A7       | 0.018 | C17orf90     | 0.042 |
| 1994 | PPCDC         | 0.018 | IQCB1        | 0.042 |
| 1995 | SPN           | 0.018 | R3HDM2       | 0.043 |
| 1996 | COTL1         | 0.018 | MPP6         | 0.043 |
| 1997 | FAM102B       | 0.018 | F2R          | 0.043 |
| 1998 | NDUFV3        | 0.018 | TLR10        | 0.043 |
| 1999 | FOXO4         | 0.018 | SNX25        | 0.043 |
| 2000 | LTB4R         | 0.018 | PXN          | 0.043 |
| 2001 | CECR2         | 0.018 | CEACAM1      | 0.043 |
| 2002 | MBTPS2        | 0.018 | KRI1         | 0.043 |
| 2003 | DAZAP2        | 0.018 | LOC729513    | 0.043 |
| 2004 | ETFA          | 0.018 | LRRC37BP1    | 0.043 |
| 2005 | LOC100506144  | 0.018 | NDUFS8       | 0.043 |
| 2006 | WDR61         | 0.018 | ARHGAP9      | 0.043 |
| 2007 | SFXN1         | 0.018 | CRBN         | 0.043 |
| 2008 | TRPS1         | 0.018 | TAGLN        | 0.043 |
| 2009 | LOC155060     | 0.018 | TC2N         | 0.043 |
| 2010 | C19orf22      | 0.018 | MGEA5        | 0.043 |
| 2011 | C1orf106      | 0.018 | PRMT5        | 0.044 |
| 2012 | RPL23AP7      | 0.018 | PAQR6        | 0.044 |

|      |              |       |              |       |
|------|--------------|-------|--------------|-------|
| 2013 | TRIM44       | 0.018 | PCCA         | 0.044 |
| 2014 | XRCC4        | 0.018 | TLR6         | 0.044 |
| 2015 | CELF6        | 0.018 | GCET2        | 0.044 |
| 2016 | GOLGA2       | 0.018 | RNASE4       | 0.044 |
| 2017 | LOC100129196 | 0.018 | ARHGAP33     | 0.044 |
| 2018 | XRCC5        | 0.018 | POLR3GL      | 0.044 |
| 2019 | CCDC154      | 0.018 | FBXL12       | 0.044 |
| 2020 | AP3D1        | 0.018 | RMI1         | 0.044 |
| 2021 | LOC202781    | 0.018 | FAM26F       | 0.044 |
| 2022 | 41336.000    | 0.018 | RNF181       | 0.044 |
| 2023 | PCBP2        | 0.018 | SOX5         | 0.044 |
| 2024 | CARD11       | 0.018 | ENTPD7       | 0.044 |
| 2025 | POGK         | 0.018 | C2orf81      | 0.044 |
| 2026 | ZNF154       | 0.018 | NDUFAB1      | 0.044 |
| 2027 | KIF4A        | 0.018 | GRPEL2       | 0.044 |
| 2028 | GPR55        | 0.018 | ZNF268       | 0.044 |
| 2029 | ISG20        | 0.018 | KIAA1467     | 0.044 |
| 2030 | PMEPA1       | 0.018 | PHF16        | 0.044 |
| 2031 | CD83         | 0.018 | C18orf18     | 0.044 |
| 2032 | SKAP1        | 0.018 | MEAF6        | 0.044 |
| 2033 | SNX11        | 0.018 | MAP7D1       | 0.044 |
| 2034 | TET3         | 0.018 | LOC100129250 | 0.044 |
| 2035 | ZNF358       | 0.018 | TNK1         | 0.044 |
| 2036 | STX4         | 0.018 | GUF1         | 0.044 |
| 2037 | GCET2        | 0.018 | C6orf25      | 0.044 |
| 2038 | RALGAPA2     | 0.018 | CYP2U1       | 0.044 |
| 2039 | SF3A1        | 0.018 | TOP1         | 0.044 |
| 2040 | STK40        | 0.018 | GAB1         | 0.044 |
| 2041 | HAX1         | 0.018 | DNAJC19      | 0.045 |
| 2042 | TMCO6        | 0.018 | IMMP2L       | 0.045 |
| 2043 | SNX30        | 0.018 | IFITM2       | 0.045 |
| 2044 | SBF2         | 0.018 | KIAA2018     | 0.045 |
| 2045 | MAPK8IP3     | 0.018 | ARSG         | 0.045 |
| 2046 | ZNF320       | 0.018 | DISP1        | 0.045 |
| 2047 | MAPKAPK2     | 0.018 | DOLK         | 0.045 |
| 2048 | DHX58        | 0.018 | PMPCA        | 0.045 |
| 2049 | NSMCE4A      | 0.018 | LIMS1        | 0.045 |
| 2050 | HRH4         | 0.018 | HLA-DRB5     | 0.045 |
| 2051 | FAM76B       | 0.018 | C19orf42     | 0.045 |
| 2052 | LASS4        | 0.018 | NLRP7        | 0.045 |
| 2053 | RAB3D        | 0.018 | LATS1        | 0.045 |
| 2054 | TMEM111      | 0.018 | BBS1         | 0.045 |
| 2055 | RIMKLB       | 0.018 | TPP1         | 0.045 |
| 2056 | KLHL20       | 0.018 | FOXO3        | 0.045 |
| 2057 | NDUFB5       | 0.018 | SNHG5        | 0.045 |
| 2058 | SRSF8        | 0.018 | CD59         | 0.045 |
| 2059 | KAT2A        | 0.018 | ECE2         | 0.045 |
| 2060 | ACADVL       | 0.018 | CNPY3        | 0.045 |
| 2061 | CCBL1        | 0.018 | RNF138       | 0.045 |
| 2062 | DEAF1        | 0.018 | UQCRH        | 0.045 |
| 2063 | ZNF880       | 0.018 | PAX6         | 0.045 |
| 2064 | IFIT1        | 0.018 | DMTF1        | 0.045 |
| 2065 | ZBED5        | 0.018 | CNR1         | 0.045 |
| 2066 | C9orf91      | 0.018 | MOAP1        | 0.045 |
| 2067 | DEK          | 0.018 | CDAN1        | 0.046 |
| 2068 | TCEAL8       | 0.018 | PRCD         | 0.046 |
| 2069 | SMAGP        | 0.018 | ZBED5        | 0.046 |
| 2070 | FNBP1        | 0.018 | LOC100499489 | 0.046 |
| 2071 | ZNF717       | 0.018 | PNRC1        | 0.046 |
| 2072 | CLK4         | 0.018 | NBPF10       | 0.046 |
| 2073 | PI4KB        | 0.018 | TSNARE1      | 0.046 |
| 2074 | COCH         | 0.018 | DDX60L       | 0.046 |
| 2075 | ACSL4        | 0.018 | ZNF302       | 0.046 |
| 2076 | SLC25A29     | 0.018 | MST1         | 0.046 |
| 2077 | TRAF1        | 0.018 | TSPAN18      | 0.046 |
| 2078 | LANCL2       | 0.019 | ELMOD3       | 0.046 |
| 2079 | IL10RA       | 0.019 | ZNF569       | 0.046 |
| 2080 | DCTN3        | 0.019 | SOCS1        | 0.046 |
| 2081 | TSC22D2      | 0.019 | CHCHD4       | 0.046 |
| 2082 | AACS         | 0.019 | PGM2L1       | 0.046 |
| 2083 | ZNF431       | 0.019 | HOPX         | 0.046 |
| 2084 | TAF1D        | 0.019 | RIOK2        | 0.047 |
| 2085 | SLC30A4      | 0.019 | HECA         | 0.047 |
| 2086 | TMEM2        | 0.019 | ARSD         | 0.047 |
| 2087 | 41524.000    | 0.019 | LOC100507053 | 0.047 |
| 2088 | APH1B        | 0.019 | APOBEC3C     | 0.047 |
| 2089 | ATAD2B       | 0.019 | RPA1         | 0.047 |
| 2090 | ATRN         | 0.019 | BNIP1        | 0.047 |



|      |              |       |           |       |
|------|--------------|-------|-----------|-------|
| 2091 | ZC3H6        | 0.019 | TTC27     | 0.047 |
| 2092 | SERPINB1     | 0.019 | IRS1      | 0.047 |
| 2093 | ZNF318       | 0.019 | TMEM159   | 0.047 |
| 2094 | MFSD2A       | 0.019 | PSMB6     | 0.047 |
| 2095 | DNAJC15      | 0.019 | CLMN      | 0.047 |
| 2096 | MLKL         | 0.019 | NETO2     | 0.047 |
| 2097 | TLR6         | 0.019 | TMEM185B  | 0.047 |
| 2098 | ACVR1B       | 0.019 | EXOSC6    | 0.047 |
| 2099 | IKBIP        | 0.019 | POLR3C    | 0.047 |
| 2100 | TUBB6        | 0.019 | FAM3C     | 0.047 |
| 2101 | ATP13A1      | 0.019 | LSM3      | 0.048 |
| 2102 | SLC24A6      | 0.019 | MS4A14    | 0.048 |
| 2103 | DIAPH3       | 0.019 | IQCE      | 0.048 |
| 2104 | EXOC1        | 0.019 | PLK3      | 0.048 |
| 2105 | SUFU         | 0.019 | CCDC85B   | 0.048 |
| 2106 | PLEKHA1      | 0.019 | FLJ31306  | 0.048 |
| 2107 | CENPT        | 0.019 | PTBP2     | 0.048 |
| 2108 | DSN1         | 0.019 | KIAA1009  | 0.048 |
| 2109 | RHBDD3       | 0.019 | HYI       | 0.048 |
| 2110 | SYVN1        | 0.019 | NCR3      | 0.048 |
| 2111 | RRP7B        | 0.019 | ZNF766    | 0.048 |
| 2112 | C5orf45      | 0.019 | ZNF154    | 0.048 |
| 2113 | APC2         | 0.019 | GPBP1L1   | 0.048 |
| 2114 | KLF7         | 0.019 | HEXDC     | 0.048 |
| 2115 | NDUFB11      | 0.019 | UACA      | 0.048 |
| 2116 | FAM117B      | 0.019 | LOC152217 | 0.049 |
| 2117 | TCL6         | 0.019 | NRD1      | 0.049 |
| 2118 | SRCAP        | 0.019 | C4orf48   | 0.049 |
| 2119 | C12orf75     | 0.019 | RAB12     | 0.049 |
| 2120 | ALS2CR12     | 0.019 | ZNF589    | 0.049 |
| 2121 | UFSP2        | 0.019 | CD6       | 0.049 |
| 2122 | TCF20        | 0.019 | ATM       | 0.049 |
| 2123 | PPRC1        | 0.019 | ZNF217    | 0.049 |
| 2124 | ADAM8        | 0.019 | VAMP4     | 0.049 |
| 2125 | APC          | 0.019 | DENND4C   | 0.049 |
| 2126 | UNKL         | 0.019 | NOTCH1    | 0.049 |
| 2127 | LRRFIP1      | 0.019 | TSC22D1   | 0.049 |
| 2128 | LOC100132707 | 0.019 | CDKL1     | 0.049 |
| 2129 | CCNT2        | 0.019 | SIPA1     | 0.049 |
| 2130 | YTHDF3       | 0.019 | ODF2      | 0.049 |
| 2131 | ADAM10       | 0.019 | USP45     | 0.049 |
| 2132 | MT1X         | 0.019 | SLC9A9    | 0.049 |
| 2133 | SNX2         | 0.019 | NDUFS5    | 0.049 |
| 2134 | IL4R         | 0.019 | FAM20B    | 0.049 |
| 2135 | TRIM62       | 0.019 | RORA      | 0.049 |
| 2136 | INO80        | 0.019 | DIDO1     | 0.049 |
| 2137 | MX2          | 0.019 | AP1S3     | 0.049 |
| 2138 | UBE2Z        | 0.019 | STRBP     | 0.049 |
| 2139 | TBC1D13      | 0.019 | PLEKHG2   | 0.049 |
| 2140 | HCG26        | 0.019 | RCOR3     | 0.050 |
| 2141 | SESTD1       | 0.019 | C20orf94  | 0.050 |
| 2142 | FAM172A      | 0.019 | ATP5G1    | 0.050 |
| 2143 | TSPYL4       | 0.019 | CRIM1     | 0.050 |
| 2144 | SPTLC2       | 0.019 | CYB561D1  | 0.050 |
| 2145 | GCH1         | 0.019 | CDKN1A    | 0.050 |
| 2146 | BLCAP        | 0.019 | EXOC4     | 0.050 |
| 2147 | LDOC1L       | 0.019 | ZFP82     | 0.050 |
| 2148 | HDHD1        | 0.019 |           |       |
| 2149 | SCAMP4       | 0.019 |           |       |
| 2150 | SRSF7        | 0.019 |           |       |
| 2151 | TMEM55B      | 0.019 |           |       |
| 2152 | SEMA4F       | 0.019 |           |       |
| 2153 | CLIC4        | 0.019 |           |       |
| 2154 | KPNA5        | 0.019 |           |       |
| 2155 | KIF19        | 0.019 |           |       |
| 2156 | C1orf63      | 0.019 |           |       |
| 2157 | MAEA         | 0.019 |           |       |
| 2158 | PNKP         | 0.019 |           |       |
| 2159 | VDAC3        | 0.019 |           |       |
| 2160 | C1orf228     | 0.019 |           |       |
| 2161 | PPM1K        | 0.019 |           |       |
| 2162 | ARMCX2       | 0.019 |           |       |
| 2163 | C5orf42      | 0.019 |           |       |
| 2164 | GPBP1L1      | 0.019 |           |       |
| 2165 | NTSE         | 0.019 |           |       |
| 2166 | GPAA1        | 0.019 |           |       |
| 2167 | SRF          | 0.019 |           |       |
| 2168 | C11orf21     | 0.019 |           |       |

|      |           |       |
|------|-----------|-------|
| 2169 | MYO15B    | 0.019 |
| 2170 | INADL     | 0.019 |
| 2171 | CREB1     | 0.019 |
| 2172 | MGC39372  | 0.019 |
| 2173 | CENPI     | 0.019 |
| 2174 | POLR2D    | 0.019 |
| 2175 | RNPS1     | 0.019 |
| 2176 | ZNF567    | 0.019 |
| 2177 | CD99L2    | 0.019 |
| 2178 | HMGB3     | 0.019 |
| 2179 | PSMB5     | 0.019 |
| 2180 | C14orf166 | 0.019 |
| 2181 | CCDC82    | 0.019 |
| 2182 | SNHG5     | 0.019 |
| 2183 | TXNL4B    | 0.019 |
| 2184 | BTLA      | 0.019 |
| 2185 | SLC15A4   | 0.019 |
| 2186 | HSPB1     | 0.019 |
| 2187 | ZNF707    | 0.019 |
| 2188 | MFSD6     | 0.019 |
| 2189 | FKBP1A    | 0.019 |
| 2190 | TAZ       | 0.019 |
| 2191 | DAPK3     | 0.019 |
| 2192 | COPE      | 0.019 |
| 2193 | CLIC1     | 0.019 |
| 2194 | MTMR3     | 0.019 |
| 2195 | HPS4      | 0.019 |
| 2196 | ZNF469    | 0.019 |
| 2197 | HAT1      | 0.019 |
| 2198 | PREX1     | 0.019 |
| 2199 | YOD1      | 0.019 |
| 2200 | CD82      | 0.019 |
| 2201 | PTAR1     | 0.019 |
| 2202 | LOC643749 | 0.019 |
| 2203 | C1orf151  | 0.019 |
| 2204 | CASP2     | 0.019 |
| 2205 | SMYD5     | 0.019 |
| 2206 | DBP       | 0.019 |
| 2207 | RASSF3    | 0.019 |
| 2208 | SMAP1     | 0.019 |
| 2209 | CCNB1IP1  | 0.019 |
| 2210 | CNIH      | 0.019 |
| 2211 | CD1A      | 0.019 |
| 2212 | TMEM229B  | 0.019 |
| 2213 | ZCCHC8    | 0.019 |
| 2214 | LYRM4     | 0.019 |
| 2215 | TMEM222   | 0.019 |
| 2216 | ACAP2     | 0.019 |
| 2217 | ADD2      | 0.019 |
| 2218 | ZNF821    | 0.019 |
| 2219 | ESR1      | 0.019 |
| 2220 | PRKAB1    | 0.019 |
| 2221 | IGFBP4    | 0.019 |
| 2222 | C17orf58  | 0.019 |
| 2223 | LHPP      | 0.019 |
| 2224 | EIF2AK1   | 0.019 |
| 2225 | NLRP1     | 0.019 |
| 2226 | ZC3H15    | 0.019 |
| 2227 | SP140L    | 0.019 |
| 2228 | GSPT1     | 0.019 |
| 2229 | APOBEC3B  | 0.019 |
| 2230 | STK25     | 0.019 |
| 2231 | S100A6    | 0.019 |
| 2232 | NFYA      | 0.019 |
| 2233 | CIRBP     | 0.019 |
| 2234 | CD5       | 0.019 |
| 2235 | ALAD      | 0.019 |
| 2236 | C5orf53   | 0.019 |
| 2237 | POLDIP2   | 0.019 |
| 2238 | BBS4      | 0.019 |
| 2239 | EIF4G3    | 0.019 |
| 2240 | MED12     | 0.019 |
| 2241 | TEP1      | 0.019 |
| 2242 | LOC387647 | 0.019 |
| 2243 | ZNF91     | 0.019 |
| 2244 | PHLPP2    | 0.019 |
| 2245 | GAPT      | 0.019 |
| 2246 | RAB11FIP4 | 0.019 |

|      |          |       |
|------|----------|-------|
| 2247 | ZAP70    | 0.019 |
| 2248 | ZNF829   | 0.019 |
| 2249 | ZSWIM7   | 0.019 |
| 2250 | LIG3     | 0.019 |
| 2251 | ACAA2    | 0.019 |
| 2252 | PLXNA3   | 0.019 |
| 2253 | ATF5     | 0.019 |
| 2254 | VPS35    | 0.019 |
| 2255 | HIGD1A   | 0.019 |
| 2256 | DPP7     | 0.019 |
| 2257 | CAPN12   | 0.019 |
| 2258 | LYSMD3   | 0.019 |
| 2259 | TAPT1    | 0.019 |
| 2260 | FLJ39653 | 0.019 |
| 2261 | GMFG     | 0.019 |
| 2262 | LYPLA1   | 0.019 |
| 2263 | SLC9A7   | 0.019 |
| 2264 | RFK      | 0.019 |
| 2265 | SYS1     | 0.019 |
| 2266 | ZNF285   | 0.019 |
| 2267 | NRIP1    | 0.019 |
| 2268 | FAM76A   | 0.019 |
| 2269 | SOBP     | 0.019 |
| 2270 | DOPEY2   | 0.019 |
| 2271 | MAML3    | 0.019 |
| 2272 | ASPM     | 0.019 |
| 2273 | PUS1     | 0.019 |
| 2274 | GALT     | 0.019 |
| 2275 | PSMB3    | 0.019 |
| 2276 | IFI30    | 0.019 |
| 2277 | MDS2     | 0.019 |
| 2278 | ZNF148   | 0.019 |
| 2279 | MIDN     | 0.019 |
| 2280 | ZNF434   | 0.019 |
| 2281 | MREG     | 0.019 |
| 2282 | ZBTB25   | 0.019 |
| 2283 | YIF1A    | 0.019 |
| 2284 | ZNF253   | 0.019 |
| 2285 | SF3B5    | 0.019 |
| 2286 | BFSP2    | 0.019 |
| 2287 | CELF2    | 0.019 |
| 2288 | AVEN     | 0.019 |
| 2289 | LY75     | 0.019 |
| 2290 | CYC1     | 0.019 |
| 2291 | ZNF430   | 0.019 |
| 2292 | SRGAP2   | 0.019 |
| 2293 | NBAS     | 0.019 |
| 2294 | ZSCAN29  | 0.019 |
| 2295 | SIAH1    | 0.019 |
| 2296 | CCDC28B  | 0.019 |
| 2297 | SLC25A3  | 0.019 |
| 2298 | CD86     | 0.020 |
| 2299 | PRKAG1   | 0.020 |
| 2300 | FAM160B2 | 0.020 |
| 2301 | CTSS     | 0.020 |
| 2302 | PTEN     | 0.020 |
| 2303 | PICK1    | 0.020 |
| 2304 | SLC12A9  | 0.020 |
| 2305 | MIR142   | 0.020 |
| 2306 | NEK9     | 0.020 |
| 2307 | BRCA1    | 0.020 |
| 2308 | EBPL     | 0.020 |
| 2309 | FBXL5    | 0.020 |
| 2310 | SDHB     | 0.020 |
| 2311 | ACO2     | 0.020 |
| 2312 | TM2D1    | 0.020 |
| 2313 | CYB5R3   | 0.020 |
| 2314 | TULP4    | 0.020 |
| 2315 | SIGLEC5  | 0.020 |
| 2316 | SH3BP5   | 0.020 |
| 2317 | DFNB31   | 0.020 |
| 2318 | FZR1     | 0.020 |
| 2319 | ABTB2    | 0.020 |
| 2320 | TEX9     | 0.020 |
| 2321 | POLDIP3  | 0.020 |
| 2322 | PHGDH    | 0.020 |
| 2323 | RBM6     | 0.020 |
| 2324 | LRR1     | 0.020 |

|      |          |       |
|------|----------|-------|
| 2325 | ZNF354C  | 0.020 |
| 2326 | HDDC2    | 0.020 |
| 2327 | ANKRD49  | 0.020 |
| 2328 | FAM46A   | 0.020 |
| 2329 | AMPD3    | 0.020 |
| 2330 | TTC31    | 0.020 |
| 2331 | CIC      | 0.020 |
| 2332 | ZKSCAN4  | 0.020 |
| 2333 | ZNF362   | 0.020 |
| 2334 | KIAA2018 | 0.020 |
| 2335 | APPL2    | 0.020 |
| 2336 | NKIRAS2  | 0.020 |
| 2337 | COPS3    | 0.020 |
| 2338 | PTPRS    | 0.020 |
| 2339 | C19orf29 | 0.020 |
| 2340 | ANKAR    | 0.020 |
| 2341 | HSPA9    | 0.020 |
| 2342 | ZNF626   | 0.020 |
| 2343 | DDX51    | 0.020 |
| 2344 | ZBTB7B   | 0.020 |
| 2345 | RBM39    | 0.020 |
| 2346 | ATP5J    | 0.020 |
| 2347 | ACADSB   | 0.020 |
| 2348 | C16orf62 | 0.020 |
| 2349 | STX3     | 0.020 |
| 2350 | CDCA2    | 0.020 |
| 2351 | CBWD2    | 0.020 |
| 2352 | CWF19L2  | 0.020 |
| 2353 | CDC27    | 0.020 |
| 2354 | ZNF236   | 0.020 |
| 2355 | RGS14    | 0.020 |
| 2356 | ALG1     | 0.020 |
| 2357 | SLC36A1  | 0.020 |
| 2358 | PHRF1    | 0.020 |
| 2359 | PIF1     | 0.020 |
| 2360 | DYRK1B   | 0.020 |
| 2361 | MXI1     | 0.020 |
| 2362 | DMXL1    | 0.020 |
| 2363 | SPSB3    | 0.020 |
| 2364 | COX7B    | 0.020 |
| 2365 | FAM26F   | 0.020 |
| 2366 | EEF1D    | 0.020 |
| 2367 | ZBTB7A   | 0.020 |
| 2368 | LYRM7    | 0.020 |
| 2369 | SIRT1    | 0.020 |
| 2370 | DPM1     | 0.020 |
| 2371 | TRIM38   | 0.020 |
| 2372 | PRUNE2   | 0.020 |
| 2373 | GON4L    | 0.020 |
| 2374 | TBXA2R   | 0.020 |
| 2375 | SLFN13   | 0.020 |
| 2376 | C14orf2  | 0.020 |
| 2377 | TTC12    | 0.020 |
| 2378 | SPEN     | 0.020 |
| 2379 | DPH1     | 0.020 |
| 2380 | IL18BP   | 0.020 |
| 2381 | VAV3     | 0.020 |
| 2382 | SDF2     | 0.020 |
| 2383 | GLOD4    | 0.020 |
| 2384 | USP16    | 0.020 |
| 2385 | EPT1     | 0.020 |
| 2386 | PPP1R12A | 0.020 |
| 2387 | CTSA     | 0.020 |
| 2388 | BBS2     | 0.020 |
| 2389 | C10orf2  | 0.020 |
| 2390 | PSMB7    | 0.020 |
| 2391 | ZDHH2    | 0.020 |
| 2392 | LPHN1    | 0.020 |
| 2393 | C12orf48 | 0.020 |
| 2394 | ARHGAP9  | 0.020 |
| 2395 | BOD1     | 0.020 |
| 2396 | C3orf63  | 0.020 |
| 2397 | RAB2A    | 0.020 |
| 2398 | EXOSC4   | 0.020 |
| 2399 | TXNDC12  | 0.020 |
| 2400 | MMD      | 0.020 |
| 2401 | CPSF2    | 0.020 |
| 2402 | SDHA     | 0.020 |

|      |          |       |
|------|----------|-------|
| 2403 | SPRY1    | 0.020 |
| 2404 | PHPT1    | 0.020 |
| 2405 | RALGPS2  | 0.020 |
| 2406 | ZNF740   | 0.020 |
| 2407 | CHCHD1   | 0.020 |
| 2408 | ZNF276   | 0.020 |
| 2409 | FCRL2    | 0.020 |
| 2410 | C9orf167 | 0.020 |
| 2411 | FRRS1    | 0.020 |
| 2412 | BTBD9    | 0.020 |
| 2413 | NDST1    | 0.020 |
| 2414 | DUSP18   | 0.020 |
| 2415 | C8orf55  | 0.020 |
| 2416 | FLYWCH1  | 0.020 |
| 2417 | CPD      | 0.020 |
| 2418 | TXNDC16  | 0.020 |
| 2419 | SAP30BP  | 0.020 |
| 2420 | STK17A   | 0.020 |
| 2421 | CRYBB1   | 0.020 |
| 2422 | WDR59    | 0.020 |
| 2423 | CARS     | 0.020 |
| 2424 | BUB1     | 0.020 |
| 2425 | OTUD3    | 0.020 |
| 2426 | ZNF181   | 0.020 |
| 2427 | ZNF415   | 0.020 |
| 2428 | BTN1A1   | 0.020 |
| 2429 | XCR1     | 0.020 |
| 2430 | ASPHD2   | 0.020 |
| 2431 | ACBD6    | 0.020 |
| 2432 | TRIM4    | 0.020 |
| 2433 | CDYL     | 0.020 |
| 2434 | GSS      | 0.020 |
| 2435 | PLXND1   | 0.020 |
| 2436 | AIP      | 0.020 |
| 2437 | FAM134A  | 0.020 |
| 2438 | CCDC159  | 0.020 |
| 2439 | MPST     | 0.020 |
| 2440 | RABL2B   | 0.020 |
| 2441 | MYEOV2   | 0.020 |
| 2442 | ZNF324   | 0.020 |
| 2443 | LOC81691 | 0.020 |
| 2444 | CHML     | 0.020 |
| 2445 | C2orf56  | 0.020 |
| 2446 | ATG3     | 0.020 |
| 2447 | IGF2R    | 0.020 |
| 2448 | MRPL22   | 0.020 |
| 2449 | PET112L  | 0.020 |
| 2450 | GOT1     | 0.020 |
| 2451 | DPEP2    | 0.020 |
| 2452 | MIB2     | 0.020 |
| 2453 | TELO2    | 0.020 |
| 2454 | LCMT2    | 0.020 |
| 2455 | UBE3B    | 0.020 |
| 2456 | P2RY14   | 0.020 |
| 2457 | FKBP3    | 0.020 |
| 2458 | SAP30L   | 0.020 |
| 2459 | ARHGAP25 | 0.020 |
| 2460 | DNASE1L1 | 0.020 |
| 2461 | SYBU     | 0.020 |
| 2462 | LENG8    | 0.020 |
| 2463 | ATXN7    | 0.020 |
| 2464 | SKAP2    | 0.020 |
| 2465 | DDX5     | 0.020 |
| 2466 | TCP1     | 0.020 |
| 2467 | TAF1C    | 0.020 |
| 2468 | TAF7     | 0.020 |
| 2469 | SMEK1    | 0.020 |
| 2470 | ABCA7    | 0.020 |
| 2471 | PTPRC    | 0.020 |
| 2472 | YIPF2    | 0.020 |
| 2473 | CLASRP   | 0.020 |
| 2474 | NUSAP1   | 0.020 |
| 2475 | ST3GAL4  | 0.020 |
| 2476 | P2RX5    | 0.020 |
| 2477 | GALNT6   | 0.020 |
| 2478 | PI4KAP1  | 0.020 |
| 2479 | NDUFB7   | 0.020 |
| 2480 | FGFRL1   | 0.020 |

|      |           |       |
|------|-----------|-------|
| 2481 | RARA      | 0.020 |
| 2482 | NDUFA8    | 0.020 |
| 2483 | SOS2      | 0.020 |
| 2484 | PHTF1     | 0.020 |
| 2485 | TPX2      | 0.020 |
| 2486 | C20orf112 | 0.020 |
| 2487 | PPIEL     | 0.020 |
| 2488 | RGL4      | 0.020 |
| 2489 | KCNAB2    | 0.020 |
| 2490 | ATG14     | 0.020 |
| 2491 | PHF2      | 0.020 |
| 2492 | TNFAIP8   | 0.020 |
| 2493 | PRC1      | 0.020 |
| 2494 | SNX20     | 0.020 |
| 2495 | CCDC163P  | 0.020 |
| 2496 | IQSEC1    | 0.020 |
| 2497 | DBNDD1    | 0.020 |
| 2498 | SRSF10    | 0.020 |
| 2499 | EXOSC5    | 0.020 |
| 2500 | AGPAT5    | 0.020 |
| 2501 | RP9P      | 0.020 |
| 2502 | HP1BP3    | 0.020 |
| 2503 | KHNYN     | 0.020 |
| 2504 | BAHD1     | 0.020 |
| 2505 | NDUFB1    | 0.020 |
| 2506 | CDK10     | 0.020 |
| 2507 | ARHGEF3   | 0.020 |
| 2508 | KIAA0907  | 0.020 |
| 2509 | ATP1A1    | 0.020 |
| 2510 | AKAP11    | 0.020 |
| 2511 | ZNF383    | 0.020 |
| 2512 | CAMK1D    | 0.020 |
| 2513 | APBB3     | 0.020 |
| 2514 | SPG7      | 0.020 |
| 2515 | ELMOD2    | 0.020 |
| 2516 | ZNF667    | 0.020 |
| 2517 | CTDSP1    | 0.020 |
| 2518 | NAA16     | 0.020 |
| 2519 | ZNF512B   | 0.020 |
| 2520 | GRASP     | 0.020 |
| 2521 | KIF24     | 0.020 |
| 2522 | C22orf25  | 0.020 |
| 2523 | RAB36     | 0.020 |
| 2524 | TMEM185B  | 0.020 |
| 2525 | WDR35     | 0.020 |
| 2526 | MYO1C     | 0.020 |
| 2527 | USP24     | 0.020 |
| 2528 | P2RY10    | 0.020 |
| 2529 | PELI1     | 0.020 |
| 2530 | KIAA0247  | 0.020 |
| 2531 | BIN3      | 0.020 |
| 2532 | PPPDE2    | 0.020 |
| 2533 | PSMD6     | 0.020 |
| 2534 | BHLHE41   | 0.020 |
| 2535 | BBS10     | 0.020 |
| 2536 | CSF2RB    | 0.020 |
| 2537 | ZNF641    | 0.020 |
| 2538 | EHBP1L1   | 0.020 |
| 2539 | GAPDH     | 0.020 |
| 2540 | C11orf95  | 0.020 |
| 2541 | GCF1      | 0.020 |
| 2542 | FLI1      | 0.020 |
| 2543 | RBM38     | 0.020 |
| 2544 | EFNA4     | 0.020 |
| 2545 | SGSM3     | 0.021 |
| 2546 | PLA2G16   | 0.021 |
| 2547 | OXR1      | 0.021 |
| 2548 | C14orf147 | 0.021 |
| 2549 | PDK4      | 0.021 |
| 2550 | ITGAM     | 0.021 |
| 2551 | USP33     | 0.021 |
| 2552 | SHMT1     | 0.021 |
| 2553 | ACAT1     | 0.021 |
| 2554 | RAB5C     | 0.021 |
| 2555 | TSNARE1   | 0.021 |
| 2556 | PRCP      | 0.021 |
| 2557 | C17orf56  | 0.021 |
| 2558 | C2orf18   | 0.021 |

|      |               |       |
|------|---------------|-------|
| 2559 | PSME2         | 0.021 |
| 2560 | AGXT2L2       | 0.021 |
| 2561 | SNRNP70       | 0.021 |
| 2562 | MTF1          | 0.021 |
| 2563 | LDLRAP1       | 0.021 |
| 2564 | EHD4          | 0.021 |
| 2565 | TLR10         | 0.021 |
| 2566 | MPHOSPH8      | 0.021 |
| 2567 | DHX34         | 0.021 |
| 2568 | RAD17         | 0.021 |
| 2569 | TPRA1         | 0.021 |
| 2570 | DDX26B        | 0.021 |
| 2571 | PLCH2         | 0.021 |
| 2572 | ITGA6         | 0.021 |
| 2573 | KIF16B        | 0.021 |
| 2574 | ZNF230        | 0.021 |
| 2575 | BAK1          | 0.021 |
| 2576 | TCOF1         | 0.021 |
| 2577 | RIPK3         | 0.021 |
| 2578 | CD79A         | 0.021 |
| 2579 | CORO2B        | 0.021 |
| 2580 | PCSK7         | 0.021 |
| 2581 | KLHDC5        | 0.021 |
| 2582 | TRIB2         | 0.021 |
| 2583 | FAM127A       | 0.021 |
| 2584 | GSTZ1         | 0.021 |
| 2585 | GGPS1         | 0.021 |
| 2586 | PDXK          | 0.021 |
| 2587 | SFXN3         | 0.021 |
| 2588 | GIPC3         | 0.021 |
| 2589 | PYGM          | 0.021 |
| 2590 | MTX2          | 0.021 |
| 2591 | HAUS5         | 0.021 |
| 2592 | RNF141        | 0.021 |
| 2593 | ARL8A         | 0.021 |
| 2594 | TTL           | 0.021 |
| 2595 | CAPG          | 0.021 |
| 2596 | SRBD1         | 0.021 |
| 2597 | MYO7B         | 0.021 |
| 2598 | SRSF6         | 0.021 |
| 2599 | GCNT1         | 0.021 |
| 2600 | SNAP23        | 0.021 |
| 2601 | APEX1         | 0.021 |
| 2602 | MICAL1        | 0.021 |
| 2603 | LRRC34        | 0.021 |
| 2604 | ELOVL1        | 0.021 |
| 2605 | HPCAL1        | 0.021 |
| 2606 | TOB2          | 0.021 |
| 2607 | ZMYM1         | 0.021 |
| 2608 | BLMH          | 0.021 |
| 2609 | UGDH          | 0.021 |
| 2610 | ATP6V1G1      | 0.021 |
| 2611 | FAU           | 0.021 |
| 2612 | GPATCH8       | 0.021 |
| 2613 | NAA25         | 0.021 |
| 2614 | LILRA4        | 0.021 |
| 2615 | DKFZP586I1420 | 0.021 |
| 2616 | C2orf64       | 0.021 |
| 2617 | NFXL1         | 0.021 |
| 2618 | PTK6          | 0.021 |
| 2619 | MECP2         | 0.021 |
| 2620 | CCR6          | 0.021 |
| 2621 | HTATIP2       | 0.021 |
| 2622 | CASK          | 0.021 |
| 2623 | LDHA          | 0.021 |
| 2624 | TNFSF4        | 0.021 |
| 2625 | MRPL27        | 0.021 |
| 2626 | ZBTB40        | 0.021 |
| 2627 | TRAF3IP1      | 0.021 |
| 2628 | LOC440944     | 0.021 |
| 2629 | ZNF302        | 0.021 |
| 2630 | ASB1          | 0.021 |
| 2631 | ZNF518A       | 0.021 |
| 2632 | CHUK          | 0.021 |
| 2633 | SLC35C1       | 0.021 |
| 2634 | BET1L         | 0.021 |
| 2635 | C6orf47       | 0.021 |
| 2636 | SPIN1         | 0.021 |

|      |           |       |
|------|-----------|-------|
| 2637 | ANLN      | 0.021 |
| 2638 | C3orf58   | 0.021 |
| 2639 | KCTD11    | 0.021 |
| 2640 | SRFBP1    | 0.021 |
| 2641 | TAF12     | 0.021 |
| 2642 | ZNF233    | 0.021 |
| 2643 | RHBDF2    | 0.021 |
| 2644 | TSPAN3    | 0.021 |
| 2645 | NDUFB6    | 0.021 |
| 2646 | KLRAQ1    | 0.021 |
| 2647 | DONSON    | 0.021 |
| 2648 | LPIN2     | 0.021 |
| 2649 | RETSAT    | 0.021 |
| 2650 | VAMP4     | 0.021 |
| 2651 | CRBN      | 0.021 |
| 2652 | BBX       | 0.021 |
| 2653 | ISOC2     | 0.021 |
| 2654 | KIF5C     | 0.021 |
| 2655 | RCN3      | 0.021 |
| 2656 | FRMD8     | 0.021 |
| 2657 | TAB2      | 0.021 |
| 2658 | ALPK1     | 0.021 |
| 2659 | LOC221710 | 0.021 |
| 2660 | ST7       | 0.021 |
| 2661 | LRRK2     | 0.021 |
| 2662 | SLC6A6    | 0.021 |
| 2663 | PDHA1     | 0.021 |
| 2664 | C1orf35   | 0.021 |
| 2665 | GOLGA8B   | 0.021 |
| 2666 | CDC25A    | 0.021 |
| 2667 | SIRT5     | 0.021 |
| 2668 | LOC338758 | 0.021 |
| 2669 | CDK19     | 0.021 |
| 2670 | RAB11FIP2 | 0.021 |
| 2671 | FSCN2     | 0.021 |
| 2672 | WTAP      | 0.021 |
| 2673 | SYNJ2BP   | 0.021 |
| 2674 | CALHM2    | 0.021 |
| 2675 | PDHX      | 0.021 |
| 2676 | HINT2     | 0.021 |
| 2677 | SLC46A3   | 0.021 |
| 2678 | GDI1      | 0.021 |
| 2679 | DDX31     | 0.021 |
| 2680 | PTBP2     | 0.021 |
| 2681 | KIF14     | 0.021 |
| 2682 | TRIM11    | 0.021 |
| 2683 | LITAF     | 0.021 |
| 2684 | YIF1B     | 0.021 |
| 2685 | ENGASE    | 0.021 |
| 2686 | PHLPP1    | 0.021 |
| 2687 | MAN2A2    | 0.021 |
| 2688 | GPAT2     | 0.021 |
| 2689 | USP14     | 0.021 |
| 2690 | RAD51     | 0.021 |
| 2691 | ADCK2     | 0.021 |
| 2692 | NDC80     | 0.021 |
| 2693 | ITPK1     | 0.021 |
| 2694 | TOP2A     | 0.021 |
| 2695 | STARD3    | 0.021 |
| 2696 | ZNF597    | 0.021 |
| 2697 | VEGFB     | 0.021 |
| 2698 | ZSWIM1    | 0.021 |
| 2699 | CALCOCO2  | 0.021 |
| 2700 | KIF23     | 0.021 |
| 2701 | GSTP1     | 0.021 |
| 2702 | HS3ST1    | 0.021 |
| 2703 | RAI1      | 0.021 |
| 2704 | NAPSB     | 0.021 |
| 2705 | FUT11     | 0.021 |
| 2706 | FTSJ1     | 0.021 |
| 2707 | STK38L    | 0.021 |
| 2708 | ZNF677    | 0.021 |
| 2709 | SORL1     | 0.021 |
| 2710 | ROMO1     | 0.021 |
| 2711 | PBX3      | 0.021 |
| 2712 | CNNM3     | 0.021 |
| 2713 | KIAA0754  | 0.021 |
| 2714 | TNFAIP8L1 | 0.021 |



|      |              |       |
|------|--------------|-------|
| 2715 | H2AFZ        | 0.021 |
| 2716 | SUZ12P       | 0.021 |
| 2717 | PARP1        | 0.021 |
| 2718 | C6orf204     | 0.021 |
| 2719 | AMPD1        | 0.021 |
| 2720 | HINT1        | 0.021 |
| 2721 | CSAD         | 0.021 |
| 2722 | BRF1         | 0.021 |
| 2723 | SCFD2        | 0.021 |
| 2724 | BTN2A1       | 0.021 |
| 2725 | RBMX         | 0.021 |
| 2726 | GVINP1       | 0.021 |
| 2727 | PDXDC1       | 0.021 |
| 2728 | BCL9         | 0.021 |
| 2729 | WDR74        | 0.021 |
| 2730 | DCAF4        | 0.021 |
| 2731 | POLM         | 0.021 |
| 2732 | KIAA1324L    | 0.021 |
| 2733 | AP2A2        | 0.021 |
| 2734 | PHF3         | 0.021 |
| 2735 | GANC         | 0.021 |
| 2736 | TECR         | 0.021 |
| 2737 | JAK3         | 0.021 |
| 2738 | THRA         | 0.021 |
| 2739 | FAM193B      | 0.021 |
| 2740 | LOC148413    | 0.021 |
| 2741 | PSMD2        | 0.021 |
| 2742 | DDX17        | 0.021 |
| 2743 | BCKDK        | 0.021 |
| 2744 | DSE          | 0.021 |
| 2745 | HCG11        | 0.021 |
| 2746 | MFSD11       | 0.021 |
| 2747 | DST          | 0.021 |
| 2748 | TMEM38A      | 0.021 |
| 2749 | UVRAG        | 0.021 |
| 2750 | DOCK2        | 0.021 |
| 2751 | BCL2         | 0.021 |
| 2752 | HDAC4        | 0.021 |
| 2753 | PSD4         | 0.021 |
| 2754 | ERV3         | 0.021 |
| 2755 | CDK1         | 0.021 |
| 2756 | MBTD1        | 0.021 |
| 2757 | CASZ1        | 0.021 |
| 2758 | C16orf52     | 0.021 |
| 2759 | CBLB         | 0.021 |
| 2760 | EPC1         | 0.021 |
| 2761 | POP4         | 0.021 |
| 2762 | STX6         | 0.021 |
| 2763 | MS4A7        | 0.021 |
| 2764 | LOC100289019 | 0.021 |
| 2765 | RAB12        | 0.021 |
| 2766 | HSF1         | 0.021 |
| 2767 | ZNF33B       | 0.021 |
| 2768 | KLHL6        | 0.021 |
| 2769 | MYO9A        | 0.021 |
| 2770 | CEP55        | 0.021 |
| 2771 | COL1A2       | 0.022 |
| 2772 | SNF8         | 0.022 |
| 2773 | CHD1         | 0.022 |
| 2774 | WWP2         | 0.022 |
| 2775 | LIPA         | 0.022 |
| 2776 | ZNF718       | 0.022 |
| 2777 | KATNA1       | 0.022 |
| 2778 | PLEK         | 0.022 |
| 2779 | BOD1L        | 0.022 |
| 2780 | TMEM42       | 0.022 |
| 2781 | OPN3         | 0.022 |
| 2782 | RAB8A        | 0.022 |
| 2783 | ALG13        | 0.022 |
| 2784 | ENPP2        | 0.022 |
| 2785 | BRCC3        | 0.022 |
| 2786 | IFITM2       | 0.022 |
| 2787 | PEX1         | 0.022 |
| 2788 | FLNA         | 0.022 |
| 2789 | ABCD4        | 0.022 |
| 2790 | LLGL2        | 0.022 |
| 2791 | DDX42        | 0.022 |
| 2792 | METTL3       | 0.022 |

|      |           |       |
|------|-----------|-------|
| 2793 | SLC35E1   | 0.022 |
| 2794 | ZSCAN30   | 0.022 |
| 2795 | RIMBP2    | 0.022 |
| 2796 | COL4A3BP  | 0.022 |
| 2797 | MACROD2   | 0.022 |
| 2798 | BCKDHA    | 0.022 |
| 2799 | VPS25     | 0.022 |
| 2800 | AASS      | 0.022 |
| 2801 | RNF146    | 0.022 |
| 2802 | DCAF5     | 0.022 |
| 2803 | CCDC106   | 0.022 |
| 2804 | LRFN4     | 0.022 |
| 2805 | CCNB2     | 0.022 |
| 2806 | CBWD1     | 0.022 |
| 2807 | RAB11FIP3 | 0.022 |
| 2808 | ZBTB24    | 0.022 |
| 2809 | DCP2      | 0.022 |
| 2810 | NCAPG     | 0.022 |
| 2811 | COQ10A    | 0.022 |
| 2812 | BTF3L4    | 0.022 |
| 2813 | TWF2      | 0.022 |
| 2814 | ZMAT3     | 0.022 |
| 2815 | PARP15    | 0.022 |
| 2816 | RHOBTB2   | 0.022 |
| 2817 | NBPF10    | 0.022 |
| 2818 | PBK       | 0.022 |
| 2819 | ZDHHHC17  | 0.022 |
| 2820 | C10orf76  | 0.022 |
| 2821 | DLGAP5    | 0.022 |
| 2822 | PSEN2     | 0.022 |
| 2823 | TIMM8B    | 0.022 |
| 2824 | KIF2C     | 0.022 |
| 2825 | SH2B3     | 0.022 |
| 2826 | ZNF552    | 0.022 |
| 2827 | ZNF621    | 0.022 |
| 2828 | ZNF192    | 0.022 |
| 2829 | C21orf2   | 0.022 |
| 2830 | GAMT      | 0.022 |
| 2831 | MELK      | 0.022 |
| 2832 | MDGA1     | 0.022 |
| 2833 | ACACB     | 0.022 |
| 2834 | PIK3IP1   | 0.022 |
| 2835 | THG1L     | 0.022 |
| 2836 | FTH1      | 0.022 |
| 2837 | RTCD1     | 0.022 |
| 2838 | XRCC6BP1  | 0.022 |
| 2839 | RTTN      | 0.022 |
| 2840 | CHD2      | 0.022 |
| 2841 | BNIP3L    | 0.022 |
| 2842 | RNF130    | 0.022 |
| 2843 | KIAA2013  | 0.022 |
| 2844 | TMED3     | 0.022 |
| 2845 | SLC25A24  | 0.022 |
| 2846 | ZNF280D   | 0.022 |
| 2847 | MAP3K13   | 0.022 |
| 2848 | SLC7A1    | 0.022 |
| 2849 | FOXO1     | 0.022 |
| 2850 | CASD1     | 0.022 |
| 2851 | MTFP1     | 0.022 |
| 2852 | FANCG     | 0.022 |
| 2853 | ORC2      | 0.022 |
| 2854 | HIF1AN    | 0.022 |
| 2855 | PRDM8     | 0.022 |
| 2856 | TMEM69    | 0.022 |
| 2857 | IFI6      | 0.022 |
| 2858 | IRF5      | 0.022 |
| 2859 | MRPS7     | 0.022 |
| 2860 | TMEM43    | 0.022 |
| 2861 | ARHGAP32  | 0.022 |
| 2862 | HKR1      | 0.022 |
| 2863 | ANKRD13D  | 0.022 |
| 2864 | ZNF251    | 0.022 |
| 2865 | CCDC75    | 0.022 |
| 2866 | AKAP13    | 0.022 |
| 2867 | PAPD4     | 0.022 |
| 2868 | ZNF300    | 0.022 |
| 2869 | ACIN1     | 0.022 |
| 2870 | EVI2A     | 0.022 |

|      |              |       |
|------|--------------|-------|
| 2871 | NSL1         | 0.022 |
| 2872 | RAPGEF6      | 0.022 |
| 2873 | NOL3         | 0.022 |
| 2874 | ZFP41        | 0.022 |
| 2875 | WASH1        | 0.022 |
| 2876 | SLC29A3      | 0.022 |
| 2877 | LAMP3        | 0.022 |
| 2878 | ST6GALNAC3   | 0.022 |
| 2879 | MCART6       | 0.022 |
| 2880 | SUN1         | 0.022 |
| 2881 | NCRNA00275   | 0.022 |
| 2882 | COMMD1       | 0.022 |
| 2883 | LOC100289230 | 0.022 |
| 2884 | NDUFB3       | 0.022 |
| 2885 | DNM2         | 0.022 |
| 2886 | DNAJC27      | 0.022 |
| 2887 | FAM136A      | 0.022 |
| 2888 | SLC35D1      | 0.022 |
| 2889 | ATG16L1      | 0.022 |
| 2890 | LOC153684    | 0.022 |
| 2891 | ARLSB        | 0.022 |
| 2892 | VAMP2        | 0.022 |
| 2893 | TP53         | 0.022 |
| 2894 | MAT2A        | 0.022 |
| 2895 | ENC1         | 0.022 |
| 2896 | PLD4         | 0.022 |
| 2897 | SLC25A25     | 0.022 |
| 2898 | ZNF850       | 0.022 |
| 2899 | KIAA1468     | 0.022 |
| 2900 | RNF41        | 0.022 |
| 2901 | BRP44        | 0.022 |
| 2902 | FAM98C       | 0.022 |
| 2903 | ANKS3        | 0.022 |
| 2904 | MAPK13       | 0.022 |
| 2905 | RCSD1        | 0.022 |
| 2906 | DDB1         | 0.022 |
| 2907 | DISP2        | 0.022 |
| 2908 | RARS         | 0.022 |
| 2909 | RPL32        | 0.022 |
| 2910 | MEX3C        | 0.022 |
| 2911 | PTTG1        | 0.022 |
| 2912 | C16orf61     | 0.022 |
| 2913 | C8orf58      | 0.022 |
| 2914 | THBS3        | 0.022 |
| 2915 | FKRP         | 0.022 |
| 2916 | SRSF11       | 0.022 |
| 2917 | C11orf68     | 0.022 |
| 2918 | TRIM13       | 0.022 |
| 2919 | ZNF673       | 0.022 |
| 2920 | ATP6V1A      | 0.022 |
| 2921 | LYST         | 0.022 |
| 2922 | PHLDB2       | 0.022 |
| 2923 | LRRC4        | 0.022 |
| 2924 | RBCK1        | 0.022 |
| 2925 | ILKAP        | 0.022 |
| 2926 | TAF1A        | 0.022 |
| 2927 | TJAP1        | 0.022 |
| 2928 | ABCA5        | 0.022 |
| 2929 | KLF9         | 0.022 |
| 2930 | ITSN2        | 0.022 |
| 2931 | C12orf41     | 0.022 |
| 2932 | MFGE8        | 0.022 |
| 2933 | C5orf56      | 0.022 |
| 2934 | HNRNPH1      | 0.022 |
| 2935 | DDHD2        | 0.022 |
| 2936 | NAA35        | 0.022 |
| 2937 | BTRC         | 0.022 |
| 2938 | NME1         | 0.022 |
| 2939 | PTPN18       | 0.022 |
| 2940 | ZNF180       | 0.022 |
| 2941 | SETD1B       | 0.022 |
| 2942 | CEP68        | 0.022 |
| 2943 | CEBPB        | 0.022 |
| 2944 | ABCB6        | 0.022 |
| 2945 | PRICKLE1     | 0.022 |
| 2946 | ENG          | 0.022 |
| 2947 | HIPK1        | 0.022 |
| 2948 | FAM78A       | 0.022 |

|      |            |       |
|------|------------|-------|
| 2949 | SNHG12     | 0.022 |
| 2950 | HLA-DPB2   | 0.022 |
| 2951 | E2F2       | 0.022 |
| 2952 | DHDDS      | 0.022 |
| 2953 | SHCBP1     | 0.022 |
| 2954 | LRR37BP1   | 0.022 |
| 2955 | TAF8       | 0.022 |
| 2956 | FBLN2      | 0.022 |
| 2957 | FAM131A    | 0.022 |
| 2958 | KIAA0556   | 0.022 |
| 2959 | KIAA0528   | 0.022 |
| 2960 | DNAH1      | 0.022 |
| 2961 | KLF12      | 0.022 |
| 2962 | ATN1       | 0.022 |
| 2963 | WDR48      | 0.022 |
| 2964 | SPEF2      | 0.022 |
| 2965 | FMR1       | 0.022 |
| 2966 | RGMB       | 0.022 |
| 2967 | ITPKC      | 0.022 |
| 2968 | PARK7      | 0.022 |
| 2969 | TUFM       | 0.022 |
| 2970 | HCP5       | 0.022 |
| 2971 | NCRNA00094 | 0.022 |
| 2972 | CLCN4      | 0.022 |
| 2973 | PSMD12     | 0.022 |
| 2974 | CRTC3      | 0.022 |
| 2975 | ADCK3      | 0.022 |
| 2976 | RPLP2      | 0.022 |
| 2977 | SMC6       | 0.022 |
| 2978 | ARFGAP1    | 0.022 |
| 2979 | NKX6-3     | 0.022 |
| 2980 | KIAA0889   | 0.022 |
| 2981 | KIAA1467   | 0.022 |
| 2982 | HARS       | 0.022 |
| 2983 | ARID4B     | 0.022 |
| 2984 | LIPE       | 0.022 |
| 2985 | NOB1       | 0.023 |
| 2986 | ATP2B1     | 0.023 |
| 2987 | XRRA1      | 0.023 |
| 2988 | RRN3P1     | 0.023 |
| 2989 | BCL7A      | 0.023 |
| 2990 | KSR1       | 0.023 |
| 2991 | TRAFD1     | 0.023 |
| 2992 | IMP3       | 0.023 |
| 2993 | PAIP2B     | 0.023 |
| 2994 | FLCN       | 0.023 |
| 2995 | INTS12     | 0.023 |
| 2996 | AMFR       | 0.023 |
| 2997 | CDAN1      | 0.023 |
| 2998 | COMMD6     | 0.023 |
| 2999 | TMED1      | 0.023 |
| 3000 | MATK       | 0.023 |
| 3001 | ZFX        | 0.023 |
| 3002 | CARS2      | 0.023 |
| 3003 | CAMK1      | 0.023 |
| 3004 | ZNF263     | 0.023 |
| 3005 | TIMM10     | 0.023 |
| 3006 | PNPLA2     | 0.023 |
| 3007 | ECHS1      | 0.023 |
| 3008 | ZNF319     | 0.023 |
| 3009 | SNX10      | 0.023 |
| 3010 | PFKFB3     | 0.023 |
| 3011 | EPG5       | 0.023 |
| 3012 | ZNF681     | 0.023 |
| 3013 | C2orf28    | 0.023 |
| 3014 | AMMECR1L   | 0.023 |
| 3015 | RRP8       | 0.023 |
| 3016 | RCBTB1     | 0.023 |
| 3017 | CHD1L      | 0.023 |
| 3018 | ZFAT       | 0.023 |
| 3019 | RASSF7     | 0.023 |
| 3020 | SNAPC4     | 0.023 |
| 3021 | TUBA1A     | 0.023 |
| 3022 | TEAD2      | 0.023 |
| 3023 | SLC35A2    | 0.023 |
| 3024 | ZWINT      | 0.023 |
| 3025 | DDX59      | 0.023 |
| 3026 | MEF2A      | 0.023 |

|      |              |       |
|------|--------------|-------|
| 3027 | BAI1         | 0.023 |
| 3028 | ULK1         | 0.023 |
| 3029 | ESD          | 0.023 |
| 3030 | AGPAT4       | 0.023 |
| 3031 | TUBGCP6      | 0.023 |
| 3032 | MITD1        | 0.023 |
| 3033 | PEX6         | 0.023 |
| 3034 | TCTN1        | 0.023 |
| 3035 | LOC339290    | 0.023 |
| 3036 | CROCCP3      | 0.023 |
| 3037 | MARCKSL1     | 0.023 |
| 3038 | CLEC16A      | 0.023 |
| 3039 | ZNF25        | 0.023 |
| 3040 | ZKSCAN3      | 0.023 |
| 3041 | SKA2         | 0.023 |
| 3042 | TP63         | 0.023 |
| 3043 | PRPF39       | 0.023 |
| 3044 | DGKQ         | 0.023 |
| 3045 | LIN9         | 0.023 |
| 3046 | CACNA1F      | 0.023 |
| 3047 | PITHD1       | 0.023 |
| 3048 | SP4          | 0.023 |
| 3049 | DNASE1L3     | 0.023 |
| 3050 | NFIX         | 0.023 |
| 3051 | SLC35F2      | 0.023 |
| 3052 | EPHB4        | 0.023 |
| 3053 | ING5         | 0.023 |
| 3054 | ARID3A       | 0.023 |
| 3055 | DOK1         | 0.023 |
| 3056 | NLRC3        | 0.023 |
| 3057 | PNN          | 0.023 |
| 3058 | LMO7         | 0.023 |
| 3059 | PAM          | 0.023 |
| 3060 | TSHZ2        | 0.023 |
| 3061 | NCK2         | 0.023 |
| 3062 | YME1L1       | 0.023 |
| 3063 | VCIPI1       | 0.023 |
| 3064 | CLMN         | 0.023 |
| 3065 | PFAS         | 0.023 |
| 3066 | BFAR         | 0.023 |
| 3067 | GGNBP2       | 0.023 |
| 3068 | TTL4         | 0.023 |
| 3069 | RAN          | 0.023 |
| 3070 | SKA1         | 0.023 |
| 3071 | ABTB1        | 0.023 |
| 3072 | CACNA1A      | 0.023 |
| 3073 | C14orf167    | 0.023 |
| 3074 | CEP72        | 0.023 |
| 3075 | NSUN3        | 0.023 |
| 3076 | TCEB2        | 0.023 |
| 3077 | PNMA1        | 0.023 |
| 3078 | C17orf103    | 0.023 |
| 3079 | APOBEC3G     | 0.023 |
| 3080 | UST          | 0.023 |
| 3081 | TSPYL5       | 0.023 |
| 3082 | CHURC1       | 0.023 |
| 3083 | ZDHHC23      | 0.023 |
| 3084 | PTPRO        | 0.023 |
| 3085 | CASP7        | 0.023 |
| 3086 | TBC1D9B      | 0.023 |
| 3087 | RFT1         | 0.023 |
| 3088 | AP1M1        | 0.023 |
| 3089 | KIF18B       | 0.023 |
| 3090 | YDJC         | 0.023 |
| 3091 | SLC26A1      | 0.023 |
| 3092 | POLR2K       | 0.023 |
| 3093 | LOC100130950 | 0.023 |
| 3094 | GLI4         | 0.023 |
| 3095 | PRDM15       | 0.023 |
| 3096 | RFX1         | 0.023 |
| 3097 | MORN1        | 0.023 |
| 3098 | KCNQ1        | 0.023 |
| 3099 | KIAA0415     | 0.023 |
| 3100 | SNORD104     | 0.023 |
| 3101 | AGER         | 0.023 |
| 3102 | LMBRD2       | 0.023 |
| 3103 | ZNF271       | 0.023 |
| 3104 | AMOT         | 0.023 |

|      |            |       |
|------|------------|-------|
| 3105 | ARHGAP27   | 0.023 |
| 3106 | CCDC43     | 0.023 |
| 3107 | SLC24A1    | 0.023 |
| 3108 | DYNLT3     | 0.023 |
| 3109 | IPO5       | 0.023 |
| 3110 | TTC35      | 0.023 |
| 3111 | WDR52      | 0.023 |
| 3112 | GPR18      | 0.023 |
| 3113 | S1PR4      | 0.023 |
| 3114 | SNX8       | 0.023 |
| 3115 | ZNFX1      | 0.023 |
| 3116 | ZNF75A     | 0.023 |
| 3117 | BOLA3      | 0.023 |
| 3118 | TRPC1      | 0.023 |
| 3119 | ING1       | 0.023 |
| 3120 | HNRPLL     | 0.023 |
| 3121 | FBXO41     | 0.023 |
| 3122 | PPP1R7     | 0.023 |
| 3123 | ADAM17     | 0.023 |
| 3124 | ARMC10     | 0.023 |
| 3125 | LOC220930  | 0.023 |
| 3126 | PDCD6      | 0.023 |
| 3127 | DIP2C      | 0.023 |
| 3128 | CYTH4      | 0.023 |
| 3129 | CD63       | 0.023 |
| 3130 | UQCR11     | 0.023 |
| 3131 | MYH3       | 0.023 |
| 3132 | TSEN34     | 0.023 |
| 3133 | GPM6B      | 0.023 |
| 3134 | KIAA0776   | 0.023 |
| 3135 | ARID1A     | 0.023 |
| 3136 | SFRS18     | 0.023 |
| 3137 | ZCCHC2     | 0.023 |
| 3138 | CD84       | 0.023 |
| 3139 | ZDHHC4     | 0.023 |
| 3140 | NAPA       | 0.023 |
| 3141 | NUB1       | 0.023 |
| 3142 | SHC1       | 0.023 |
| 3143 | TOMM40L    | 0.023 |
| 3144 | FAM69B     | 0.023 |
| 3145 | PFDN5      | 0.023 |
| 3146 | MAP1S      | 0.023 |
| 3147 | BUD31      | 0.023 |
| 3148 | PRRC2C     | 0.023 |
| 3149 | PLAC8      | 0.023 |
| 3150 | C16orf58   | 0.023 |
| 3151 | SUV420H1   | 0.023 |
| 3152 | PNPLA6     | 0.023 |
| 3153 | PML        | 0.023 |
| 3154 | PIM3       | 0.023 |
| 3155 | AHCYL1     | 0.023 |
| 3156 | PIK3R1     | 0.023 |
| 3157 | BCL7C      | 0.023 |
| 3158 | MAP4K4     | 0.023 |
| 3159 | NCRNA00287 | 0.023 |
| 3160 | NID1       | 0.024 |
| 3161 | SLC25A5    | 0.024 |
| 3162 | TUBB4      | 0.024 |
| 3163 | ZNF470     | 0.024 |
| 3164 | SH3GL1     | 0.024 |
| 3165 | MGST2      | 0.024 |
| 3166 | COX18      | 0.024 |
| 3167 | ZDHHC14    | 0.024 |
| 3168 | PLEKHA4    | 0.024 |
| 3169 | NOL6       | 0.024 |
| 3170 | MTX1       | 0.024 |
| 3171 | ARL6IP5    | 0.024 |
| 3172 | ATPAF2     | 0.024 |
| 3173 | EFHA2      | 0.024 |
| 3174 | TOM1       | 0.024 |
| 3175 | RPL29      | 0.024 |
| 3176 | EP400      | 0.024 |
| 3177 | SLC6A16    | 0.024 |
| 3178 | ABHD10     | 0.024 |
| 3179 | SPSB2      | 0.024 |
| 3180 | THADA      | 0.024 |
| 3181 | ESRRA      | 0.024 |
| 3182 | ZXDB       | 0.024 |

|      |          |       |
|------|----------|-------|
| 3183 | CDK17    | 0.024 |
| 3184 | RGS3     | 0.024 |
| 3185 | LRRRC14  | 0.024 |
| 3186 | COPS4    | 0.024 |
| 3187 | CCNA2    | 0.024 |
| 3188 | PXK      | 0.024 |
| 3189 | ZNF256   | 0.024 |
| 3190 | RRAS     | 0.024 |
| 3191 | RBM19    | 0.024 |
| 3192 | CCDC110  | 0.024 |
| 3193 | SNX9     | 0.024 |
| 3194 | USP25    | 0.024 |
| 3195 | PIP5K1B  | 0.024 |
| 3196 | IRF2BP1  | 0.024 |
| 3197 | RBBP4    | 0.024 |
| 3198 | PSD3     | 0.024 |
| 3199 | P2RX7    | 0.024 |
| 3200 | SLC11A1  | 0.024 |
| 3201 | RBM22    | 0.024 |
| 3202 | NAPRT1   | 0.024 |
| 3203 | USP36    | 0.024 |
| 3204 | HLA-G    | 0.024 |
| 3205 | ALOX5AP  | 0.024 |
| 3206 | ERGIC1   | 0.024 |
| 3207 | FCHSD2   | 0.024 |
| 3208 | WAS      | 0.024 |
| 3209 | ZNF347   | 0.024 |
| 3210 | TSC22D1  | 0.024 |
| 3211 | AMY2B    | 0.024 |
| 3212 | LOC91316 | 0.024 |
| 3213 | TYK2     | 0.024 |
| 3214 | SMURF2   | 0.024 |
| 3215 | PAN3     | 0.024 |
| 3216 | C3orf18  | 0.024 |
| 3217 | ZNF331   | 0.024 |
| 3218 | BIRC5    | 0.024 |
| 3219 | LRRRC37B | 0.024 |
| 3220 | ADAM1    | 0.024 |
| 3221 | C10orf88 | 0.024 |
| 3222 | RGAG4    | 0.024 |
| 3223 | STX17    | 0.024 |
| 3224 | PHACTR1  | 0.024 |
| 3225 | RAD52    | 0.024 |
| 3226 | RHOT2    | 0.024 |
| 3227 | ITGAX    | 0.024 |
| 3228 | SLC6A9   | 0.024 |
| 3229 | TAP2     | 0.024 |
| 3230 | SH3BGRL  | 0.024 |
| 3231 | ACTR5    | 0.024 |
| 3232 | NDUFA7   | 0.024 |
| 3233 | OAF      | 0.024 |
| 3234 | ITIH4    | 0.024 |
| 3235 | PARP6    | 0.024 |
| 3236 | PHF21A   | 0.024 |
| 3237 | C15orf17 | 0.024 |
| 3238 | LPPR2    | 0.024 |
| 3239 | MYBL2    | 0.024 |
| 3240 | FCGR2B   | 0.024 |
| 3241 | SFI1     | 0.024 |
| 3242 | ARHGAP39 | 0.024 |
| 3243 | ANGEL2   | 0.024 |
| 3244 | PCIF1    | 0.024 |
| 3245 | PIGG     | 0.024 |
| 3246 | TPI1     | 0.024 |
| 3247 | HFE      | 0.024 |
| 3248 | C12orf57 | 0.024 |
| 3249 | ZNF45    | 0.024 |
| 3250 | G3BP2    | 0.024 |
| 3251 | ARHGAP33 | 0.024 |
| 3252 | POU6F1   | 0.024 |
| 3253 | SLC4A7   | 0.024 |
| 3254 | BEND4    | 0.024 |
| 3255 | INPP5A   | 0.024 |
| 3256 | MLLT1    | 0.024 |
| 3257 | ZNF598   | 0.024 |
| 3258 | KLHL22   | 0.024 |
| 3259 | C19orf60 | 0.024 |
| 3260 | HJURP    | 0.024 |

|      |          |       |
|------|----------|-------|
| 3261 | HIAT1    | 0.024 |
| 3262 | METTL8   | 0.024 |
| 3263 | HSD17B1  | 0.024 |
| 3264 | PC       | 0.024 |
| 3265 | NUFIP2   | 0.024 |
| 3266 | ZHX2     | 0.024 |
| 3267 | ZNF764   | 0.024 |
| 3268 | COL24A1  | 0.024 |
| 3269 | FBXL8    | 0.024 |
| 3270 | ZNF140   | 0.024 |
| 3271 | PSIP1    | 0.024 |
| 3272 | ZNF680   | 0.024 |
| 3273 | AGPS     | 0.024 |
| 3274 | TXNL1    | 0.024 |
| 3275 | DFFB     | 0.024 |
| 3276 | GOLGA3   | 0.024 |
| 3277 | YTHDC2   | 0.024 |
| 3278 | RELL1    | 0.024 |
| 3279 | ASXL2    | 0.024 |
| 3280 | ADM2     | 0.024 |
| 3281 | TNFRSF18 | 0.024 |
| 3282 | MYC      | 0.024 |
| 3283 | ZNF212   | 0.024 |
| 3284 | PISD     | 0.024 |
| 3285 | IRAK3    | 0.024 |
| 3286 | PHF14    | 0.024 |
| 3287 | LDOC1    | 0.024 |
| 3288 | ZNHIT1   | 0.024 |
| 3289 | FBXL14   | 0.024 |
| 3290 | REV1     | 0.024 |
| 3291 | CABYR    | 0.024 |
| 3292 | PDE7B    | 0.024 |
| 3293 | ZCCHC3   | 0.024 |
| 3294 | BDH2     | 0.024 |
| 3295 | ENTPD1   | 0.024 |
| 3296 | ALDH16A1 | 0.024 |
| 3297 | ATP5O    | 0.024 |
| 3298 | PCDH12   | 0.024 |
| 3299 | MFSD4    | 0.024 |
| 3300 | NT5DC3   | 0.024 |
| 3301 | MDH2     | 0.024 |
| 3302 | HGS      | 0.024 |
| 3303 | PRNP     | 0.024 |
| 3304 | FAM89B   | 0.024 |
| 3305 | PVRIG    | 0.024 |
| 3306 | TMPRSS13 | 0.024 |
| 3307 | TESK1    | 0.024 |
| 3308 | C17orf87 | 0.024 |
| 3309 | FCGBP    | 0.024 |
| 3310 | SLC7A6   | 0.024 |
| 3311 | RNASE4   | 0.024 |
| 3312 | EMB      | 0.024 |
| 3313 | MDH1     | 0.024 |
| 3314 | N4BP2L1  | 0.024 |
| 3315 | HSPD1    | 0.024 |
| 3316 | TGOLN2   | 0.024 |
| 3317 | FLJ39639 | 0.024 |
| 3318 | SIDT1    | 0.024 |
| 3319 | AHR      | 0.024 |
| 3320 | STAG1    | 0.024 |
| 3321 | ARHGEF9  | 0.024 |
| 3322 | NEIL2    | 0.024 |
| 3323 | NAA38    | 0.024 |
| 3324 | DENND4C  | 0.024 |
| 3325 | TAGLN    | 0.024 |
| 3326 | EML4     | 0.024 |
| 3327 | NFIC     | 0.024 |
| 3328 | SENP7    | 0.024 |
| 3329 | TMEM147  | 0.024 |
| 3330 | SLC23A2  | 0.024 |
| 3331 | FAM107B  | 0.024 |
| 3332 | CDC6     | 0.024 |
| 3333 | NAGA     | 0.024 |
| 3334 | YIPF3    | 0.024 |
| 3335 | NCAPH    | 0.024 |
| 3336 | PARP16   | 0.024 |
| 3337 | ORAI2    | 0.024 |
| 3338 | FLT3LG   | 0.024 |



|      |              |       |
|------|--------------|-------|
| 3339 | PCNA         | 0.025 |
| 3340 | BMI1         | 0.025 |
| 3341 | P2RX4        | 0.025 |
| 3342 | TDP2         | 0.025 |
| 3343 | FAM13B       | 0.025 |
| 3344 | PTGIR        | 0.025 |
| 3345 | KIAA0146     | 0.025 |
| 3346 | ADAM28       | 0.025 |
| 3347 | ZNF652       | 0.025 |
| 3348 | AP1S1        | 0.025 |
| 3349 | CDKN2C       | 0.025 |
| 3350 | C11orf51     | 0.025 |
| 3351 | CCDC107      | 0.025 |
| 3352 | PSMD9        | 0.025 |
| 3353 | TOMM7        | 0.025 |
| 3354 | EPS15L1      | 0.025 |
| 3355 | WBP2         | 0.025 |
| 3356 | ZNF655       | 0.025 |
| 3357 | FOXM1        | 0.025 |
| 3358 | CD1D         | 0.025 |
| 3359 | ADNP         | 0.025 |
| 3360 | PLK1         | 0.025 |
| 3361 | R3HDM1       | 0.025 |
| 3362 | LOC388692    | 0.025 |
| 3363 | TAF4         | 0.025 |
| 3364 | NMT1         | 0.025 |
| 3365 | CHMP2A       | 0.025 |
| 3366 | PRR14L       | 0.025 |
| 3367 | EBP          | 0.025 |
| 3368 | MYST2        | 0.025 |
| 3369 | RABGAP1      | 0.025 |
| 3370 | ZNF28        | 0.025 |
| 3371 | ARHGAP11A    | 0.025 |
| 3372 | LOC146880    | 0.025 |
| 3373 | ATP5G1       | 0.025 |
| 3374 | ZNF217       | 0.025 |
| 3375 | HELQ         | 0.025 |
| 3376 | SYT11        | 0.025 |
| 3377 | MYEF2        | 0.025 |
| 3378 | UROD         | 0.025 |
| 3379 | SLCO4A1      | 0.025 |
| 3380 | SMC2         | 0.025 |
| 3381 | KIF18A       | 0.025 |
| 3382 | DNTT         | 0.025 |
| 3383 | NRBP2        | 0.025 |
| 3384 | C9orf114     | 0.025 |
| 3385 | ANXA4        | 0.025 |
| 3386 | ITGB8        | 0.025 |
| 3387 | KIAA1033     | 0.025 |
| 3388 | NAGK         | 0.025 |
| 3389 | GNG5         | 0.025 |
| 3390 | AZI1         | 0.025 |
| 3391 | NOC3L        | 0.025 |
| 3392 | GALNT10      | 0.025 |
| 3393 | YWHAQ        | 0.025 |
| 3394 | NR1D2        | 0.025 |
| 3395 | TOP1MT       | 0.025 |
| 3396 | CCDC76       | 0.025 |
| 3397 | FAM81A       | 0.025 |
| 3398 | CWC22        | 0.025 |
| 3399 | RNF219       | 0.025 |
| 3400 | KIAA1737     | 0.025 |
| 3401 | TRIP6        | 0.025 |
| 3402 | DPEP3        | 0.025 |
| 3403 | APOBEC3C     | 0.025 |
| 3404 | RFTN1        | 0.025 |
| 3405 | C20orf11     | 0.025 |
| 3406 | HERC4        | 0.025 |
| 3407 | ALKBH8       | 0.025 |
| 3408 | WDR75        | 0.025 |
| 3409 | ATPIF1       | 0.025 |
| 3410 | PTPRN2       | 0.025 |
| 3411 | C9orf130     | 0.025 |
| 3412 | ZNF135       | 0.025 |
| 3413 | TYSND1       | 0.025 |
| 3414 | LOC653160    | 0.025 |
| 3415 | H2AFJ        | 0.025 |
| 3416 | LOC100505876 | 0.025 |

|      |              |       |
|------|--------------|-------|
| 3417 | DEF8         | 0.025 |
| 3418 | ATXN2        | 0.025 |
| 3419 | NEURL4       | 0.025 |
| 3420 | CASP8AP2     | 0.025 |
| 3421 | UTP6         | 0.025 |
| 3422 | ZNF248       | 0.025 |
| 3423 | NOXA1        | 0.025 |
| 3424 | 41334.000    | 0.025 |
| 3425 | RIC8B        | 0.025 |
| 3426 | WNT16        | 0.025 |
| 3427 | ZNF514       | 0.025 |
| 3428 | TCF19        | 0.025 |
| 3429 | STARD9       | 0.025 |
| 3430 | UTP11L       | 0.025 |
| 3431 | TCTN3        | 0.025 |
| 3432 | GNB4         | 0.025 |
| 3433 | PRPF4B       | 0.025 |
| 3434 | SENP2        | 0.025 |
| 3435 | CHKA         | 0.025 |
| 3436 | ZNF397       | 0.025 |
| 3437 | IL2RA        | 0.025 |
| 3438 | ZBTB17       | 0.025 |
| 3439 | TALDO1       | 0.025 |
| 3440 | NAT6         | 0.025 |
| 3441 | ZNF570       | 0.025 |
| 3442 | HERPUD2      | 0.025 |
| 3443 | RASAL3       | 0.025 |
| 3444 | NBPF14       | 0.025 |
| 3445 | CD96         | 0.025 |
| 3446 | OTUD7B       | 0.025 |
| 3447 | CELF1        | 0.025 |
| 3448 | FAM43A       | 0.025 |
| 3449 | HSPA8        | 0.025 |
| 3450 | MEN1         | 0.025 |
| 3451 | RQCD1        | 0.025 |
| 3452 | KRCC1        | 0.025 |
| 3453 | MTMR6        | 0.025 |
| 3454 | ZNF607       | 0.025 |
| 3455 | SENP6        | 0.025 |
| 3456 | LRRC56       | 0.025 |
| 3457 | EPHA4        | 0.025 |
| 3458 | TTC21A       | 0.025 |
| 3459 | MYL12B       | 0.025 |
| 3460 | AHCY         | 0.025 |
| 3461 | ZKSCAN5      | 0.025 |
| 3462 | DHX29        | 0.025 |
| 3463 | FBXO31       | 0.025 |
| 3464 | TBC1D20      | 0.025 |
| 3465 | RAD54L       | 0.025 |
| 3466 | PPP6R2       | 0.025 |
| 3467 | MAFK         | 0.025 |
| 3468 | CLIP2        | 0.025 |
| 3469 | ECHDC2       | 0.025 |
| 3470 | POLR3E       | 0.025 |
| 3471 | WDR27        | 0.025 |
| 3472 | ZNF117       | 0.025 |
| 3473 | ANKS6        | 0.025 |
| 3474 | RLF          | 0.025 |
| 3475 | PSMD10       | 0.025 |
| 3476 | DDX58        | 0.025 |
| 3477 | MRPL53       | 0.025 |
| 3478 | BRCA2        | 0.025 |
| 3479 | ZNF419       | 0.025 |
| 3480 | KIFC1        | 0.025 |
| 3481 | C12orf42     | 0.025 |
| 3482 | GLIPR2       | 0.025 |
| 3483 | CHPT1        | 0.025 |
| 3484 | TGM2         | 0.025 |
| 3485 | CSR2BP       | 0.025 |
| 3486 | CDK9         | 0.025 |
| 3487 | SLC41A1      | 0.025 |
| 3488 | SLC12A4      | 0.025 |
| 3489 | DGKG         | 0.025 |
| 3490 | ZNF439       | 0.025 |
| 3491 | LOC100128822 | 0.025 |
| 3492 | DCLRE1C      | 0.025 |
| 3493 | ST6GALNAC6   | 0.025 |
| 3494 | ZBTB48       | 0.025 |

|      |           |       |
|------|-----------|-------|
| 3495 | TNRC6B    | 0.025 |
| 3496 | GRAMD1A   | 0.025 |
| 3497 | HDAC7     | 0.025 |
| 3498 | LOC645212 | 0.025 |
| 3499 | ACRBP     | 0.025 |
| 3500 | TAF9      | 0.025 |
| 3501 | ZNF845    | 0.025 |
| 3502 | SLC20A1   | 0.025 |
| 3503 | IRAK4     | 0.025 |
| 3504 | TMEM170A  | 0.025 |
| 3505 | CTU1      | 0.025 |
| 3506 | IFI16     | 0.025 |
| 3507 | ERMP1     | 0.025 |
| 3508 | RSL1D1    | 0.025 |
| 3509 | FPGS      | 0.025 |
| 3510 | TLR1      | 0.025 |
| 3511 | OGG1      | 0.025 |
| 3512 | ZCCHC10   | 0.025 |
| 3513 | SSBP3     | 0.025 |
| 3514 | KLHL24    | 0.025 |
| 3515 | IL24      | 0.025 |
| 3516 | PLXNA2    | 0.025 |
| 3517 | ZNF76     | 0.025 |
| 3518 | KIAA0802  | 0.025 |
| 3519 | MPPE1     | 0.025 |
| 3520 | RIMS3     | 0.025 |
| 3521 | SAP25     | 0.025 |
| 3522 | MTFR1     | 0.025 |
| 3523 | SUGT1     | 0.025 |
| 3524 | HSPBAP1   | 0.025 |
| 3525 | PDK3      | 0.025 |
| 3526 | RAB31     | 0.025 |
| 3527 | TTF1      | 0.025 |
| 3528 | ZNF234    | 0.025 |
| 3529 | KIAA1524  | 0.025 |
| 3530 | MKI67IP   | 0.025 |
| 3531 | MFN1      | 0.025 |
| 3532 | PLEKHA8   | 0.025 |
| 3533 | C2orf43   | 0.025 |
| 3534 | ZADH2     | 0.025 |
| 3535 | ABHD12    | 0.026 |
| 3536 | ATXN7L1   | 0.026 |
| 3537 | PGAM1     | 0.026 |
| 3538 | MRPL47    | 0.026 |
| 3539 | SNX27     | 0.026 |
| 3540 | COX7A2L   | 0.026 |
| 3541 | STMN1     | 0.026 |
| 3542 | ENTPD6    | 0.026 |
| 3543 | NCF1B     | 0.026 |
| 3544 | ATP8A1    | 0.026 |
| 3545 | CSTB      | 0.026 |
| 3546 | CDK11A    | 0.026 |
| 3547 | PLAA      | 0.026 |
| 3548 | GRLF1     | 0.026 |
| 3549 | MXRA8     | 0.026 |
| 3550 | WDR91     | 0.026 |
| 3551 | RAB11A    | 0.026 |
| 3552 | CDC42BPG  | 0.026 |
| 3553 | SPC25     | 0.026 |
| 3554 | NRCAM     | 0.026 |
| 3555 | DGCR8     | 0.026 |
| 3556 | DTX1      | 0.026 |
| 3557 | DMWD      | 0.026 |
| 3558 | XK        | 0.026 |
| 3559 | NDNL2     | 0.026 |
| 3560 | PDCD7     | 0.026 |
| 3561 | FEN1      | 0.026 |
| 3562 | PLEKHG2   | 0.026 |
| 3563 | SCAND2    | 0.026 |
| 3564 | UQCRC2    | 0.026 |
| 3565 | DEDD2     | 0.026 |
| 3566 | E2F8      | 0.026 |
| 3567 | LRCH1     | 0.026 |
| 3568 | NFYB      | 0.026 |
| 3569 | BAG1      | 0.026 |
| 3570 | NFKBID    | 0.026 |
| 3571 | DAPP1     | 0.026 |
| 3572 | RBM4      | 0.026 |

|      |              |       |
|------|--------------|-------|
| 3573 | ZDHC8        | 0.026 |
| 3574 | MYD88        | 0.026 |
| 3575 | CCDC64       | 0.026 |
| 3576 | C5orf13      | 0.026 |
| 3577 | MRPS36       | 0.026 |
| 3578 | KIAA1949     | 0.026 |
| 3579 | CAMKK1       | 0.026 |
| 3580 | HMGB1        | 0.026 |
| 3581 | AURKA        | 0.026 |
| 3582 | KIF11        | 0.026 |
| 3583 | NCRNA00219   | 0.026 |
| 3584 | INSIG2       | 0.026 |
| 3585 | ZNF329       | 0.026 |
| 3586 | WDFY2        | 0.026 |
| 3587 | FMO5         | 0.026 |
| 3588 | C10orf26     | 0.026 |
| 3589 | DEPDC1B      | 0.026 |
| 3590 | MMAA         | 0.026 |
| 3591 | TNPO2        | 0.026 |
| 3592 | TK2          | 0.026 |
| 3593 | KCNIP2       | 0.026 |
| 3594 | RNF125       | 0.026 |
| 3595 | CLDN15       | 0.026 |
| 3596 | ADSS         | 0.026 |
| 3597 | GLS          | 0.026 |
| 3598 | OSBPL7       | 0.026 |
| 3599 | QRSL1        | 0.026 |
| 3600 | CCS          | 0.026 |
| 3601 | DPF2         | 0.026 |
| 3602 | ADCK4        | 0.026 |
| 3603 | RAB5A        | 0.026 |
| 3604 | CGGBP1       | 0.026 |
| 3605 | 41527.000    | 0.026 |
| 3606 | ZNF649       | 0.026 |
| 3607 | SUGP2        | 0.026 |
| 3608 | C19orf54     | 0.026 |
| 3609 | TMEM200A     | 0.026 |
| 3610 | HDAC1        | 0.026 |
| 3611 | TSPAN32      | 0.026 |
| 3612 | LOC100507463 | 0.026 |
| 3613 | MKRN1        | 0.026 |
| 3614 | XAB2         | 0.026 |
| 3615 | FAM58A       | 0.026 |
| 3616 | PSMG4        | 0.026 |
| 3617 | SETD4        | 0.026 |
| 3618 | ZNF627       | 0.026 |
| 3619 | SAMD4B       | 0.026 |
| 3620 | ZNF490       | 0.026 |
| 3621 | CBLL1        | 0.026 |
| 3622 | RPL22        | 0.026 |
| 3623 | TCFL5        | 0.026 |
| 3624 | ATP6V0E2     | 0.026 |
| 3625 | STS          | 0.026 |
| 3626 | WHSC1L1      | 0.026 |
| 3627 | NBPF3        | 0.026 |
| 3628 | DDX56        | 0.026 |
| 3629 | PHF20        | 0.026 |
| 3630 | ILK          | 0.026 |
| 3631 | GNG2         | 0.026 |
| 3632 | PPP1R13L     | 0.026 |
| 3633 | RFX2         | 0.026 |
| 3634 | C2orf44      | 0.026 |
| 3635 | TRIO         | 0.026 |
| 3636 | LILRB1       | 0.026 |
| 3637 | ZNF445       | 0.026 |
| 3638 | B4GALT7      | 0.026 |
| 3639 | ABCA11P      | 0.026 |
| 3640 | MKI67        | 0.026 |
| 3641 | LAMP1        | 0.026 |
| 3642 | ZCCHC11      | 0.026 |
| 3643 | ZNF549       | 0.026 |
| 3644 | MRAS         | 0.026 |
| 3645 | TLR4         | 0.026 |
| 3646 | PPHLN1       | 0.026 |
| 3647 | FAR2         | 0.026 |
| 3648 | PHC2         | 0.026 |
| 3649 | UBE2E2       | 0.026 |
| 3650 | C17orf108    | 0.026 |

|      |          |       |
|------|----------|-------|
| 3651 | ZNF585A  | 0.026 |
| 3652 | C17orf48 | 0.026 |
| 3653 | PNPLA7   | 0.026 |
| 3654 | PDIK1L   | 0.026 |
| 3655 | C22orf23 | 0.026 |
| 3656 | RARRES3  | 0.026 |
| 3657 | ORMDL2   | 0.026 |
| 3658 | SNX6     | 0.026 |
| 3659 | GUK1     | 0.026 |
| 3660 | APP      | 0.026 |
| 3661 | TUBG1    | 0.026 |
| 3662 | PCDH9    | 0.026 |
| 3663 | FAM189B  | 0.026 |
| 3664 | ANKRD13A | 0.026 |
| 3665 | VILL     | 0.026 |
| 3666 | MAD2L1   | 0.026 |
| 3667 | ZNF136   | 0.027 |
| 3668 | NPM3     | 0.027 |
| 3669 | RNF111   | 0.027 |
| 3670 | ENOX2    | 0.027 |
| 3671 | ANKRA2   | 0.027 |
| 3672 | C12orf45 | 0.027 |
| 3673 | L1CAM    | 0.027 |
| 3674 | SLC25A35 | 0.027 |
| 3675 | SNRPC    | 0.027 |
| 3676 | MRPL23   | 0.027 |
| 3677 | LGALS8   | 0.027 |
| 3678 | VNN2     | 0.027 |
| 3679 | TDG      | 0.027 |
| 3680 | RALGDS   | 0.027 |
| 3681 | SCAI     | 0.027 |
| 3682 | ECI1     | 0.027 |
| 3683 | ZNF736   | 0.027 |
| 3684 | LEPRE1   | 0.027 |
| 3685 | TNK1     | 0.027 |
| 3686 | DMTF1    | 0.027 |
| 3687 | ZNF611   | 0.027 |
| 3688 | HERC3    | 0.027 |
| 3689 | ZNF860   | 0.027 |
| 3690 | PORCN    | 0.027 |
| 3691 | HACE1    | 0.027 |
| 3692 | CCDC134  | 0.027 |
| 3693 | TSR2     | 0.027 |
| 3694 | CTSF     | 0.027 |
| 3695 | ZNF169   | 0.027 |
| 3696 | FAM167A  | 0.027 |
| 3697 | NFKBIE   | 0.027 |
| 3698 | RNMT     | 0.027 |
| 3699 | ZNF569   | 0.027 |
| 3700 | PCBD1    | 0.027 |
| 3701 | KDELC1   | 0.027 |
| 3702 | CREM     | 0.027 |
| 3703 | CD52     | 0.027 |
| 3704 | ZNF436   | 0.027 |
| 3705 | SELPLG   | 0.027 |
| 3706 | INPPL1   | 0.027 |
| 3707 | LNP1     | 0.027 |
| 3708 | PTPRE    | 0.027 |
| 3709 | CIT      | 0.027 |
| 3710 | RPS23    | 0.027 |
| 3711 | COPS7A   | 0.027 |
| 3712 | CRNKL1   | 0.027 |
| 3713 | RIOK3    | 0.027 |
| 3714 | PPAPDC1B | 0.027 |
| 3715 | SLC39A13 | 0.027 |
| 3716 | TXLNG    | 0.027 |
| 3717 | SBK1     | 0.027 |
| 3718 | DENND1A  | 0.027 |
| 3719 | ROD1     | 0.027 |
| 3720 | CDH1     | 0.027 |
| 3721 | LAPTM4B  | 0.027 |
| 3722 | C7orf58  | 0.027 |
| 3723 | ZNF446   | 0.027 |
| 3724 | ZNF551   | 0.027 |
| 3725 | VAPB     | 0.027 |
| 3726 | MRPL48   | 0.027 |
| 3727 | ZNF75D   | 0.027 |
| 3728 | OXNAD1   | 0.027 |

|      |          |       |
|------|----------|-------|
| 3729 | OBSCN    | 0.027 |
| 3730 | SEMA6A   | 0.027 |
| 3731 | SAP30    | 0.027 |
| 3732 | RRM1     | 0.027 |
| 3733 | PER2     | 0.027 |
| 3734 | USP19    | 0.027 |
| 3735 | HMOX2    | 0.027 |
| 3736 | CKAP2L   | 0.027 |
| 3737 | LUC7L3   | 0.027 |
| 3738 | CCT7     | 0.027 |
| 3739 | UBE2D1   | 0.027 |
| 3740 | CREBZF   | 0.027 |
| 3741 | INTS1    | 0.027 |
| 3742 | SLC25A30 | 0.027 |
| 3743 | CAPRIN1  | 0.027 |
| 3744 | RRM2     | 0.027 |
| 3745 | CDC14A   | 0.027 |
| 3746 | UBXN11   | 0.027 |
| 3747 | LRRC41   | 0.027 |
| 3748 | CDC40    | 0.027 |
| 3749 | ZNF781   | 0.027 |
| 3750 | NAP1L4   | 0.027 |
| 3751 | KIAA0391 | 0.027 |
| 3752 | CCDC120  | 0.027 |
| 3753 | VPS11    | 0.027 |
| 3754 | REEP3    | 0.027 |
| 3755 | BACE1    | 0.027 |
| 3756 | CTBS     | 0.027 |
| 3757 | TMEM167A | 0.027 |
| 3758 | ZNF517   | 0.027 |
| 3759 | PEX16    | 0.027 |
| 3760 | MSI2     | 0.027 |
| 3761 | WDR7     | 0.027 |
| 3762 | ABC88    | 0.027 |
| 3763 | DPYSL2   | 0.027 |
| 3764 | MTM1     | 0.027 |
| 3765 | SYNPO    | 0.027 |
| 3766 | TOMM22   | 0.027 |
| 3767 | ZNF721   | 0.027 |
| 3768 | FBXO33   | 0.027 |
| 3769 | KHDRBS2  | 0.027 |
| 3770 | PIGM     | 0.027 |
| 3771 | LCOR     | 0.027 |
| 3772 | G6PC3    | 0.027 |
| 3773 | KIF20A   | 0.027 |
| 3774 | GRAP     | 0.027 |
| 3775 | ANKRD33B | 0.027 |
| 3776 | PAWR     | 0.027 |
| 3777 | UQCRC1   | 0.027 |
| 3778 | C2orf67  | 0.027 |
| 3779 | APOM     | 0.027 |
| 3780 | NPRL3    | 0.027 |
| 3781 | BAIAP3   | 0.027 |
| 3782 | URGCP    | 0.027 |
| 3783 | RARS2    | 0.027 |
| 3784 | CCDC18   | 0.027 |
| 3785 | BPTF     | 0.027 |
| 3786 | LIMK2    | 0.027 |
| 3787 | ATF7     | 0.027 |
| 3788 | ZCCHC18  | 0.027 |
| 3789 | ZNF608   | 0.027 |
| 3790 | HLX      | 0.027 |
| 3791 | HDHD2    | 0.027 |
| 3792 | C4orf42  | 0.027 |
| 3793 | FES      | 0.027 |
| 3794 | RALB     | 0.027 |
| 3795 | COL6A3   | 0.027 |
| 3796 | SNX3     | 0.027 |
| 3797 | FAF1     | 0.027 |
| 3798 | CSRP1    | 0.027 |
| 3799 | ZNF577   | 0.027 |
| 3800 | SVIL     | 0.027 |
| 3801 | GLA      | 0.027 |
| 3802 | CCDC51   | 0.027 |
| 3803 | C20orf12 | 0.027 |
| 3804 | PAICS    | 0.027 |
| 3805 | ZNF443   | 0.027 |
| 3806 | CENPN    | 0.027 |

|      |           |       |
|------|-----------|-------|
| 3807 | TMEM8B    | 0.027 |
| 3808 | PTPRG     | 0.027 |
| 3809 | TFAP4     | 0.027 |
| 3810 | NUDT13    | 0.027 |
| 3811 | PTDSS2    | 0.027 |
| 3812 | GRAMD4    | 0.027 |
| 3813 | POLH      | 0.027 |
| 3814 | VRK1      | 0.027 |
| 3815 | CECR5     | 0.027 |
| 3816 | SDHC      | 0.027 |
| 3817 | FRA10AC1  | 0.027 |
| 3818 | TET2      | 0.027 |
| 3819 | HELLS     | 0.027 |
| 3820 | S1PR1     | 0.027 |
| 3821 | CCNDBP1   | 0.028 |
| 3822 | RPL22L1   | 0.028 |
| 3823 | LRRC37A4  | 0.028 |
| 3824 | DPH5      | 0.028 |
| 3825 | RUNDC2A   | 0.028 |
| 3826 | ORC4      | 0.028 |
| 3827 | ZNF605    | 0.028 |
| 3828 | IRS2      | 0.028 |
| 3829 | CHST14    | 0.028 |
| 3830 | GRAMD1C   | 0.028 |
| 3831 | CRELD1    | 0.028 |
| 3832 | ABCD3     | 0.028 |
| 3833 | PUM1      | 0.028 |
| 3834 | MDM4      | 0.028 |
| 3835 | ZNF407    | 0.028 |
| 3836 | LZTS2     | 0.028 |
| 3837 | CENPA     | 0.028 |
| 3838 | GAS7      | 0.028 |
| 3839 | ZNF528    | 0.028 |
| 3840 | GLIPR1    | 0.028 |
| 3841 | ARHGEF11  | 0.028 |
| 3842 | FKBPL     | 0.028 |
| 3843 | NRBF2     | 0.028 |
| 3844 | GAB1      | 0.028 |
| 3845 | ZNF24     | 0.028 |
| 3846 | SAR1A     | 0.028 |
| 3847 | FNIP1     | 0.028 |
| 3848 | OCRL      | 0.028 |
| 3849 | DDAH2     | 0.028 |
| 3850 | SGOL2     | 0.028 |
| 3851 | ZNF837    | 0.028 |
| 3852 | SPINK2    | 0.028 |
| 3853 | PRKAG2    | 0.028 |
| 3854 | PCYOX1L   | 0.028 |
| 3855 | ZNF550    | 0.028 |
| 3856 | HERC1     | 0.028 |
| 3857 | ZNF682    | 0.028 |
| 3858 | PKD1P1    | 0.028 |
| 3859 | C4orf34   | 0.028 |
| 3860 | CCND2     | 0.028 |
| 3861 | C14orf182 | 0.028 |
| 3862 | TRIOBP    | 0.028 |
| 3863 | ZNF770    | 0.028 |
| 3864 | ADD3      | 0.028 |
| 3865 | ZNF204P   | 0.028 |
| 3866 | CA11      | 0.028 |
| 3867 | VKORC1    | 0.028 |
| 3868 | RCHY1     | 0.028 |
| 3869 | MTMR9     | 0.028 |
| 3870 | MDM1      | 0.028 |
| 3871 | ERICH1    | 0.028 |
| 3872 | C7orf64   | 0.028 |
| 3873 | ZNF137P   | 0.028 |
| 3874 | ZNF761    | 0.028 |
| 3875 | WHAMML1   | 0.028 |
| 3876 | WDR89     | 0.028 |
| 3877 | CPPED1    | 0.028 |
| 3878 | TTC15     | 0.028 |
| 3879 | GSG2      | 0.028 |
| 3880 | PMS2P11   | 0.028 |
| 3881 | NLRP2     | 0.028 |
| 3882 | KDM4A     | 0.028 |
| 3883 | NOP58     | 0.028 |
| 3884 | MAT2B     | 0.028 |

|      |           |       |
|------|-----------|-------|
| 3885 | DCTN6     | 0.028 |
| 3886 | C22orf39  | 0.028 |
| 3887 | GOLT1B    | 0.028 |
| 3888 | CLEC4A    | 0.028 |
| 3889 | MYEOV     | 0.028 |
| 3890 | PPM1J     | 0.028 |
| 3891 | FAM18B2   | 0.028 |
| 3892 | NCKAP5L   | 0.028 |
| 3893 | TGIF1     | 0.028 |
| 3894 | RAP2C     | 0.028 |
| 3895 | TIGD5     | 0.028 |
| 3896 | C16orf79  | 0.028 |
| 3897 | DHX37     | 0.028 |
| 3898 | APITD1    | 0.028 |
| 3899 | HSPC157   | 0.028 |
| 3900 | BAG3      | 0.028 |
| 3901 | MGAT5     | 0.028 |
| 3902 | GTSE1     | 0.028 |
| 3903 | ADRB2     | 0.028 |
| 3904 | JTB       | 0.028 |
| 3905 | SBNO2     | 0.028 |
| 3906 | ARL10     | 0.028 |
| 3907 | TEX2      | 0.028 |
| 3908 | PKIA      | 0.028 |
| 3909 | ANUBL1    | 0.028 |
| 3910 | ZNF223    | 0.028 |
| 3911 | HARS2     | 0.028 |
| 3912 | ZIK1      | 0.028 |
| 3913 | ADPGK     | 0.028 |
| 3914 | C9orf69   | 0.028 |
| 3915 | PDRG1     | 0.028 |
| 3916 | IDH3A     | 0.028 |
| 3917 | PGD       | 0.028 |
| 3918 | COBLL1    | 0.028 |
| 3919 | ARRB1     | 0.028 |
| 3920 | KIF21A    | 0.028 |
| 3921 | CNR1      | 0.028 |
| 3922 | IGF1R     | 0.028 |
| 3923 | LOC285830 | 0.028 |
| 3924 | ANKZF1    | 0.028 |
| 3925 | YTHDC1    | 0.028 |
| 3926 | LZTR1     | 0.028 |
| 3927 | ACAD10    | 0.028 |
| 3928 | MRM1      | 0.028 |
| 3929 | NUP160    | 0.028 |
| 3930 | C2orf60   | 0.028 |
| 3931 | C17orf61  | 0.028 |
| 3932 | TMEM220   | 0.028 |
| 3933 | RNFT1     | 0.028 |
| 3934 | FLJ39582  | 0.028 |
| 3935 | DIAPH2    | 0.028 |
| 3936 | ZNF418    | 0.028 |
| 3937 | TMEM70    | 0.028 |
| 3938 | TRAK2     | 0.028 |
| 3939 | MTR       | 0.028 |
| 3940 | GABRR2    | 0.028 |
| 3941 | PRPF38B   | 0.029 |
| 3942 | DDX11L2   | 0.029 |
| 3943 | MSL2      | 0.029 |
| 3944 | RBM45     | 0.029 |
| 3945 | LSM3      | 0.029 |
| 3946 | LMO2      | 0.029 |
| 3947 | FAM40A    | 0.029 |
| 3948 | FUT7      | 0.029 |
| 3949 | NME3      | 0.029 |
| 3950 | GPM6A     | 0.029 |
| 3951 | TTC28     | 0.029 |
| 3952 | C9orf123  | 0.029 |
| 3953 | EGR3      | 0.029 |
| 3954 | STRAP     | 0.029 |
| 3955 | PPP4R1    | 0.029 |
| 3956 | LOC440434 | 0.029 |
| 3957 | HMGB2     | 0.029 |
| 3958 | C1orf97   | 0.029 |
| 3959 | MRPS16    | 0.029 |
| 3960 | LPP       | 0.029 |
| 3961 | FAM83D    | 0.029 |
| 3962 | SLC7A11   | 0.029 |



|      |              |       |
|------|--------------|-------|
| 3963 | ZNF229       | 0.029 |
| 3964 | ZFPM1        | 0.029 |
| 3965 | C12orf24     | 0.029 |
| 3966 | E2F3         | 0.029 |
| 3967 | RPS20        | 0.029 |
| 3968 | ZC3HAV1L     | 0.029 |
| 3969 | TMEM63C      | 0.029 |
| 3970 | GCOM1        | 0.029 |
| 3971 | KPNA2        | 0.029 |
| 3972 | ACCS         | 0.029 |
| 3973 | DNAJB1       | 0.029 |
| 3974 | SSSCA1       | 0.029 |
| 3975 | PEA15        | 0.029 |
| 3976 | MKS1         | 0.029 |
| 3977 | ZNF71        | 0.029 |
| 3978 | BCL2A1       | 0.029 |
| 3979 | FAN1         | 0.029 |
| 3980 | TTC38        | 0.029 |
| 3981 | POLR1A       | 0.029 |
| 3982 | CDCA7        | 0.029 |
| 3983 | TBC1D17      | 0.029 |
| 3984 | NCKAP1L      | 0.029 |
| 3985 | SEC31B       | 0.029 |
| 3986 | FUNDC2       | 0.029 |
| 3987 | BCDIN3D      | 0.029 |
| 3988 | KDM1B        | 0.029 |
| 3989 | SBNO1        | 0.029 |
| 3990 | CD44         | 0.029 |
| 3991 | CYP4V2       | 0.029 |
| 3992 | CDCA3        | 0.029 |
| 3993 | C5orf39      | 0.029 |
| 3994 | C17orf70     | 0.029 |
| 3995 | ZNF766       | 0.029 |
| 3996 | WDR6         | 0.029 |
| 3997 | CDC25C       | 0.029 |
| 3998 | JHDM1D       | 0.029 |
| 3999 | ZFP106       | 0.029 |
| 4000 | LOC728392    | 0.029 |
| 4001 | CCNB1        | 0.029 |
| 4002 | PUM2         | 0.029 |
| 4003 | TTK          | 0.029 |
| 4004 | ZNF572       | 0.029 |
| 4005 | FAM116A      | 0.029 |
| 4006 | CCDC45       | 0.029 |
| 4007 | LOC100131564 | 0.029 |
| 4008 | EIF5A        | 0.029 |
| 4009 | GAS5         | 0.029 |
| 4010 | SMARCE1      | 0.029 |
| 4011 | SHOC2        | 0.029 |
| 4012 | TMEM138      | 0.029 |
| 4013 | MYBPC2       | 0.029 |
| 4014 | MARCKS       | 0.029 |
| 4015 | ZCCHC14      | 0.029 |
| 4016 | POLR2L       | 0.029 |
| 4017 | STOML2       | 0.029 |
| 4018 | GIN51        | 0.029 |
| 4019 | ZDHHC9       | 0.029 |
| 4020 | C18orf10     | 0.029 |
| 4021 | DIP2A        | 0.029 |
| 4022 | ATG4D        | 0.029 |
| 4023 | PIKFYVE      | 0.029 |
| 4024 | KIAA0101     | 0.029 |
| 4025 | NAALADL1     | 0.029 |
| 4026 | ZNF671       | 0.029 |
| 4027 | LRFN1        | 0.029 |
| 4028 | N6AMT1       | 0.029 |
| 4029 | HLCS         | 0.029 |
| 4030 | C3orf52      | 0.029 |
| 4031 | STXBP3       | 0.029 |
| 4032 | MRPS22       | 0.029 |
| 4033 | PPME1        | 0.029 |
| 4034 | ZNF513       | 0.029 |
| 4035 | FAM20B       | 0.029 |
| 4036 | C1orf220     | 0.029 |
| 4037 | MRPL45       | 0.029 |
| 4038 | C6orf64      | 0.029 |
| 4039 | GTPBP3       | 0.029 |
| 4040 | ZCCHC7       | 0.030 |

|      |            |       |
|------|------------|-------|
| 4041 | MERTK      | 0.030 |
| 4042 | RENBP      | 0.030 |
| 4043 | NUDCD2     | 0.030 |
| 4044 | SLAMF1     | 0.030 |
| 4045 | SUCLA2     | 0.030 |
| 4046 | RNF181     | 0.030 |
| 4047 | OLFML2A    | 0.030 |
| 4048 | PAOX       | 0.030 |
| 4049 | SEPW1      | 0.030 |
| 4050 | ZNRF2      | 0.030 |
| 4051 | ESPL1      | 0.030 |
| 4052 | LOC338799  | 0.030 |
| 4053 | LRRN2      | 0.030 |
| 4054 | MPI        | 0.030 |
| 4055 | PCCB       | 0.030 |
| 4056 | FLJ37453   | 0.030 |
| 4057 | SPON2      | 0.030 |
| 4058 | CHD7       | 0.030 |
| 4059 | SFT2D1     | 0.030 |
| 4060 | EP300      | 0.030 |
| 4061 | MYBL1      | 0.030 |
| 4062 | RBM3       | 0.030 |
| 4063 | SLFN5      | 0.030 |
| 4064 | DTL        | 0.030 |
| 4065 | NLRP6      | 0.030 |
| 4066 | C8orf38    | 0.030 |
| 4067 | SF3B1      | 0.030 |
| 4068 | C19orf66   | 0.030 |
| 4069 | LOC389641  | 0.030 |
| 4070 | CLSPN      | 0.030 |
| 4071 | ATP5F1     | 0.030 |
| 4072 | PIGN       | 0.030 |
| 4073 | C1orf144   | 0.030 |
| 4074 | PSMD1      | 0.030 |
| 4075 | SPAG5      | 0.030 |
| 4076 | IL11RA     | 0.030 |
| 4077 | DOPEY1     | 0.030 |
| 4078 | ZNHIT6     | 0.030 |
| 4079 | CNTNAP2    | 0.030 |
| 4080 | FRMD4A     | 0.030 |
| 4081 | CORO1B     | 0.030 |
| 4082 | CPNE5      | 0.030 |
| 4083 | LTBP2      | 0.030 |
| 4084 | CD320      | 0.030 |
| 4085 | ZNF696     | 0.030 |
| 4086 | PCYT2      | 0.030 |
| 4087 | UBE2W      | 0.030 |
| 4088 | ARNT       | 0.030 |
| 4089 | INSR       | 0.030 |
| 4090 | EIF3I      | 0.030 |
| 4091 | IRAK1      | 0.030 |
| 4092 | C11orf35   | 0.030 |
| 4093 | FAM13AOS   | 0.030 |
| 4094 | KIAA0664L3 | 0.030 |
| 4095 | KRBA1      | 0.030 |
| 4096 | PSTPIP2    | 0.030 |
| 4097 | RAB11FIP1  | 0.030 |
| 4098 | PPP2R4     | 0.030 |
| 4099 | MYNN       | 0.030 |
| 4100 | TTYH2      | 0.030 |
| 4101 | MRPS18A    | 0.030 |
| 4102 | GLTSCR1    | 0.030 |
| 4103 | THAP11     | 0.030 |
| 4104 | CARD8      | 0.030 |
| 4105 | DUSP22     | 0.030 |
| 4106 | ZNF780A    | 0.030 |
| 4107 | KRIT1      | 0.030 |
| 4108 | SLC9A8     | 0.030 |
| 4109 | SETD3      | 0.030 |
| 4110 | FLJ45340   | 0.030 |
| 4111 | NFKBIZ     | 0.030 |
| 4112 | TRPM6      | 0.030 |
| 4113 | PIP4K2A    | 0.030 |
| 4114 | KCTD5      | 0.030 |
| 4115 | INPP5E     | 0.030 |
| 4116 | NLRP7      | 0.030 |
| 4117 | FBXO21     | 0.030 |
| 4118 | ANKRD32    | 0.030 |

|      |           |       |
|------|-----------|-------|
| 4119 | SDR42E1   | 0.030 |
| 4120 | CDK16     | 0.030 |
| 4121 | IPMK      | 0.030 |
| 4122 | ZNF507    | 0.030 |
| 4123 | EXOSC2    | 0.030 |
| 4124 | ANKRD50   | 0.030 |
| 4125 | LOC646214 | 0.030 |
| 4126 | TNKS      | 0.030 |
| 4127 | MAP4K1    | 0.030 |
| 4128 | TSFM      | 0.030 |
| 4129 | ZNF527    | 0.030 |
| 4130 | C2CD3     | 0.030 |
| 4131 | DZIP3     | 0.030 |
| 4132 | MUT       | 0.030 |
| 4133 | KCTD20    | 0.030 |
| 4134 | FAM66C    | 0.030 |
| 4135 | KBTBD8    | 0.030 |
| 4136 | SH3BP5L   | 0.030 |
| 4137 | FAM117A   | 0.031 |
| 4138 | SCN4A     | 0.031 |
| 4139 | COL9A3    | 0.031 |
| 4140 | ETAA1     | 0.031 |
| 4141 | POLI      | 0.031 |
| 4142 | ELP2      | 0.031 |
| 4143 | PRPF40B   | 0.031 |
| 4144 | PGAM2     | 0.031 |
| 4145 | ZNF675    | 0.031 |
| 4146 | PEG10     | 0.031 |
| 4147 | ZNF831    | 0.031 |
| 4148 | PCM1      | 0.031 |
| 4149 | SLC7A7    | 0.031 |
| 4150 | COL19A1   | 0.031 |
| 4151 | C16orf55  | 0.031 |
| 4152 | NDUFS6    | 0.031 |
| 4153 | SERPINB6  | 0.031 |
| 4154 | ARHGEF10  | 0.031 |
| 4155 | ANGEL1    | 0.031 |
| 4156 | WDR19     | 0.031 |
| 4157 | ZNF429    | 0.031 |
| 4158 | KLHL9     | 0.031 |
| 4159 | CREB3L4   | 0.031 |
| 4160 | CASC4     | 0.031 |
| 4161 | TMEM192   | 0.031 |
| 4162 | STIL      | 0.031 |
| 4163 | ZNF189    | 0.031 |
| 4164 | BBS1      | 0.031 |
| 4165 | UBE2G2    | 0.031 |
| 4166 | UTS2R     | 0.031 |
| 4167 | AURKB     | 0.031 |
| 4168 | C4orf52   | 0.031 |
| 4169 | ZXDC      | 0.031 |
| 4170 | CYB5D1    | 0.031 |
| 4171 | PKM2      | 0.031 |
| 4172 | GPATCH3   | 0.031 |
| 4173 | ZNF281    | 0.031 |
| 4174 | COX4NB    | 0.031 |
| 4175 | POLG2     | 0.031 |
| 4176 | NDUFB8    | 0.031 |
| 4177 | FAM160B1  | 0.031 |
| 4178 | ZNF501    | 0.031 |
| 4179 | MRPL40    | 0.031 |
| 4180 | ZNF485    | 0.031 |
| 4181 | ZNF345    | 0.031 |
| 4182 | ADK       | 0.031 |
| 4183 | TPCN2     | 0.031 |
| 4184 | ProSAPIP1 | 0.031 |
| 4185 | RUFY2     | 0.031 |
| 4186 | C5orf22   | 0.031 |
| 4187 | PIP5K1C   | 0.031 |
| 4188 | ZNF571    | 0.031 |
| 4189 | CNST      | 0.031 |
| 4190 | CA5B      | 0.031 |
| 4191 | IRAK2     | 0.031 |
| 4192 | LOC729513 | 0.031 |
| 4193 | CATSPER2  | 0.031 |
| 4194 | C5orf41   | 0.031 |
| 4195 | ZMYM5     | 0.031 |
| 4196 | LOC400931 | 0.031 |

|      |           |       |
|------|-----------|-------|
| 4197 | HIST1H2BH | 0.031 |
| 4198 | DPY19L1   | 0.031 |
| 4199 | NEK6      | 0.031 |
| 4200 | SUCLG2    | 0.031 |
| 4201 | ATP2A1    | 0.031 |
| 4202 | JMJD1C    | 0.031 |
| 4203 | NDUFB9    | 0.031 |
| 4204 | RPL30     | 0.031 |
| 4205 | SLAMF6    | 0.031 |
| 4206 | PTGS1     | 0.031 |
| 4207 | ZNF175    | 0.031 |
| 4208 | GNA12     | 0.031 |
| 4209 | MEIR5     | 0.031 |
| 4210 | MORF4L1   | 0.031 |
| 4211 | PCID2     | 0.031 |
| 4212 | PASK      | 0.031 |
| 4213 | ANKRD58   | 0.031 |
| 4214 | RAB3IP    | 0.031 |
| 4215 | RPLP0     | 0.031 |
| 4216 | ZBTB10    | 0.031 |
| 4217 | NAPEPLD   | 0.031 |
| 4218 | TMEM106C  | 0.031 |
| 4219 | KCNA3     | 0.031 |
| 4220 | CEP192    | 0.031 |
| 4221 | E2F7      | 0.031 |
| 4222 | RYR3      | 0.031 |
| 4223 | ZNF224    | 0.031 |
| 4224 | RNASEH2B  | 0.031 |
| 4225 | PDE3B     | 0.031 |
| 4226 | ZNF471    | 0.031 |
| 4227 | SSH1      | 0.031 |
| 4228 | AUTS2     | 0.031 |
| 4229 | GSDMB     | 0.031 |
| 4230 | CBR3      | 0.031 |
| 4231 | RIT1      | 0.031 |
| 4232 | NAB2      | 0.031 |
| 4233 | DNAJC16   | 0.031 |
| 4234 | CBX4      | 0.031 |
| 4235 | TUBA1C    | 0.031 |
| 4236 | C2orf47   | 0.031 |
| 4237 | ZNF182    | 0.031 |
| 4238 | PSENN     | 0.031 |
| 4239 | ABHD14A   | 0.031 |
| 4240 | STK32C    | 0.031 |
| 4241 | PHKA2     | 0.031 |
| 4242 | BEND5     | 0.031 |
| 4243 | LOC374443 | 0.031 |
| 4244 | PTGER4    | 0.031 |
| 4245 | LOC202181 | 0.031 |
| 4246 | SMG1      | 0.031 |
| 4247 | ZNF595    | 0.031 |
| 4248 | ZDHHC12   | 0.032 |
| 4249 | BRMS1L    | 0.032 |
| 4250 | ZNF414    | 0.032 |
| 4251 | C19orf2   | 0.032 |
| 4252 | ELMO2     | 0.032 |
| 4253 | NDUFA11   | 0.032 |
| 4254 | DCP1A     | 0.032 |
| 4255 | BRAT1     | 0.032 |
| 4256 | C19orf63  | 0.032 |
| 4257 | SCML4     | 0.032 |
| 4258 | LOC348840 | 0.032 |
| 4259 | APOBEC3F  | 0.032 |
| 4260 | NIPAL4    | 0.032 |
| 4261 | COPS8     | 0.032 |
| 4262 | ZNF85     | 0.032 |
| 4263 | ABCC5     | 0.032 |
| 4264 | RBMXL1    | 0.032 |
| 4265 | WDR18     | 0.032 |
| 4266 | ZFP2      | 0.032 |
| 4267 | NETO1     | 0.032 |
| 4268 | TNFRSF14  | 0.032 |
| 4269 | FAM73B    | 0.032 |
| 4270 | REPS1     | 0.032 |
| 4271 | FBXO28    | 0.032 |
| 4272 | ZFHX3     | 0.032 |
| 4273 | IL12RB2   | 0.032 |
| 4274 | TWSG1     | 0.032 |

|      |              |       |
|------|--------------|-------|
| 4275 | LRIG2        | 0.032 |
| 4276 | INTS7        | 0.032 |
| 4277 | BAZ2B        | 0.032 |
| 4278 | KCNC3        | 0.032 |
| 4279 | ST3GAL3      | 0.032 |
| 4280 | CDCA5        | 0.032 |
| 4281 | LGMN         | 0.032 |
| 4282 | ATP11A       | 0.032 |
| 4283 | FAM120C      | 0.032 |
| 4284 | CCDC57       | 0.032 |
| 4285 | FH           | 0.032 |
| 4286 | AP1S2        | 0.032 |
| 4287 | NFKB1        | 0.032 |
| 4288 | SETX         | 0.032 |
| 4289 | PSMC3        | 0.032 |
| 4290 | ANAPC16      | 0.032 |
| 4291 | CLK3         | 0.032 |
| 4292 | ZNF525       | 0.032 |
| 4293 | LMTK2        | 0.032 |
| 4294 | KCTD15       | 0.032 |
| 4295 | N4BP2L2      | 0.032 |
| 4296 | SLCO5A1      | 0.032 |
| 4297 | MED17        | 0.032 |
| 4298 | RASA4        | 0.032 |
| 4299 | CTSC         | 0.032 |
| 4300 | MID1IP1      | 0.032 |
| 4301 | GPR137       | 0.032 |
| 4302 | MTF2         | 0.032 |
| 4303 | SLC25A10     | 0.032 |
| 4304 | CAPNS1       | 0.032 |
| 4305 | SNX4         | 0.032 |
| 4306 | ELP4         | 0.032 |
| 4307 | ZFYVE19      | 0.032 |
| 4308 | NPL          | 0.032 |
| 4309 | GBGT1        | 0.032 |
| 4310 | NFATC2       | 0.032 |
| 4311 | UQCR10       | 0.032 |
| 4312 | SELO         | 0.032 |
| 4313 | SNRPD1       | 0.032 |
| 4314 | DBF4         | 0.032 |
| 4315 | MBD5         | 0.032 |
| 4316 | GPR155       | 0.032 |
| 4317 | ZFP37        | 0.032 |
| 4318 | USP32        | 0.032 |
| 4319 | ZNF43        | 0.032 |
| 4320 | TRAPPC2L     | 0.032 |
| 4321 | CASP8        | 0.032 |
| 4322 | GSDMD        | 0.032 |
| 4323 | TOLLIP       | 0.032 |
| 4324 | SNRNP48      | 0.032 |
| 4325 | PNMA3        | 0.032 |
| 4326 | DNAH10       | 0.032 |
| 4327 | GOT2         | 0.032 |
| 4328 | CHST10       | 0.032 |
| 4329 | QDPR         | 0.032 |
| 4330 | ARPC1B       | 0.032 |
| 4331 | ZNF200       | 0.032 |
| 4332 | ARPC4        | 0.032 |
| 4333 | CCNJ         | 0.032 |
| 4334 | HPSE         | 0.032 |
| 4335 | SAV1         | 0.032 |
| 4336 | HPS3         | 0.032 |
| 4337 | LOC100499177 | 0.032 |
| 4338 | FBXL3        | 0.032 |
| 4339 | DOK7         | 0.032 |
| 4340 | CABP4        | 0.032 |
| 4341 | RAP2A        | 0.032 |
| 4342 | MAP2         | 0.032 |
| 4343 | NPEPL1       | 0.032 |
| 4344 | FBXO11       | 0.032 |
| 4345 | KIAA0930     | 0.032 |
| 4346 | PKN2         | 0.032 |
| 4347 | HEG1         | 0.032 |
| 4348 | NEIL1        | 0.032 |
| 4349 | RNASL        | 0.032 |
| 4350 | GNS          | 0.032 |
| 4351 | WHSC2        | 0.032 |
| 4352 | C14orf139    | 0.032 |

|      |           |       |
|------|-----------|-------|
| 4353 | HIATL2    | 0.032 |
| 4354 | TBX19     | 0.032 |
| 4355 | CSRNP2    | 0.032 |
| 4356 | DCAF16    | 0.032 |
| 4357 | LOC286367 | 0.032 |
| 4358 | PVRL1     | 0.032 |
| 4359 | USP44     | 0.032 |
| 4360 | BTG1      | 0.032 |
| 4361 | IFRD1     | 0.032 |
| 4362 | CHIC1     | 0.033 |
| 4363 | PPP1R9A   | 0.033 |
| 4364 | SLC39A10  | 0.033 |
| 4365 | C1QTNF6   | 0.033 |
| 4366 | CDC45     | 0.033 |
| 4367 | RPL15     | 0.033 |
| 4368 | MSL1      | 0.033 |
| 4369 | RGS1      | 0.033 |
| 4370 | FLJ10661  | 0.033 |
| 4371 | QARS      | 0.033 |
| 4372 | C9orf78   | 0.033 |
| 4373 | ARIH1     | 0.033 |
| 4374 | ISG15     | 0.033 |
| 4375 | TFR2      | 0.033 |
| 4376 | IVNS1ABP  | 0.033 |
| 4377 | UBA7      | 0.033 |
| 4378 | ZNF568    | 0.033 |
| 4379 | DPPA4     | 0.033 |
| 4380 | RCAN3     | 0.033 |
| 4381 | MPZ       | 0.033 |
| 4382 | PIBF1     | 0.033 |
| 4383 | SLC26A11  | 0.033 |
| 4384 | ZDHHC7    | 0.033 |
| 4385 | UBL5      | 0.033 |
| 4386 | RBL2      | 0.033 |
| 4387 | SLAIN1    | 0.033 |
| 4388 | FAM89A    | 0.033 |
| 4389 | RICTOR    | 0.033 |
| 4390 | SCNN1D    | 0.033 |
| 4391 | SNPH      | 0.033 |
| 4392 | C1orf27   | 0.033 |
| 4393 | ABHD16B   | 0.033 |
| 4394 | TNNT3     | 0.033 |
| 4395 | OMA1      | 0.033 |
| 4396 | FIS1      | 0.033 |
| 4397 | VASH1     | 0.033 |
| 4398 | SLC18A2   | 0.033 |
| 4399 | ZNF518B   | 0.033 |
| 4400 | RPS6KA4   | 0.033 |
| 4401 | EXT2      | 0.033 |
| 4402 | C17orf37  | 0.033 |
| 4403 | TRPV3     | 0.033 |
| 4404 | MYOM1     | 0.033 |
| 4405 | PTOV1     | 0.033 |
| 4406 | PPM1N     | 0.033 |
| 4407 | HIVEP3    | 0.033 |
| 4408 | UCKL1     | 0.033 |
| 4409 | RIC3      | 0.033 |
| 4410 | LOC147727 | 0.033 |
| 4411 | C19orf61  | 0.033 |
| 4412 | ZNF865    | 0.033 |
| 4413 | ISY1      | 0.033 |
| 4414 | MLL2      | 0.033 |
| 4415 | RCOR3     | 0.033 |
| 4416 | PRX       | 0.033 |
| 4417 | RANBP9    | 0.033 |
| 4418 | ATP10D    | 0.033 |
| 4419 | VEZF1     | 0.033 |
| 4420 | C21orf67  | 0.033 |
| 4421 | DPF3      | 0.033 |
| 4422 | ATAD3A    | 0.033 |
| 4423 | ZNF461    | 0.033 |
| 4424 | C5orf51   | 0.033 |
| 4425 | INO80D    | 0.033 |
| 4426 | C11orf63  | 0.033 |
| 4427 | LRRC1     | 0.033 |
| 4428 | PRIM2     | 0.033 |
| 4429 | RPL28     | 0.033 |
| 4430 | PSMD14    | 0.033 |

|      |              |       |
|------|--------------|-------|
| 4431 | OGDH         | 0.033 |
| 4432 | AK8          | 0.033 |
| 4433 | CCDC94       | 0.033 |
| 4434 | DTNBP1       | 0.033 |
| 4435 | PHAX         | 0.033 |
| 4436 | ABI3         | 0.033 |
| 4437 | HEXIM1       | 0.033 |
| 4438 | NOL8         | 0.033 |
| 4439 | METTL16      | 0.033 |
| 4440 | SURF1        | 0.033 |
| 4441 | ZNF480       | 0.033 |
| 4442 | NCAPD2       | 0.033 |
| 4443 | STRBP        | 0.033 |
| 4444 | DDX20        | 0.034 |
| 4445 | KCTD18       | 0.034 |
| 4446 | POLQ         | 0.034 |
| 4447 | CHST11       | 0.034 |
| 4448 | CNOT7        | 0.034 |
| 4449 | ST14         | 0.034 |
| 4450 | FAM158A      | 0.034 |
| 4451 | ZNF350       | 0.034 |
| 4452 | PKNOX1       | 0.034 |
| 4453 | GNL2         | 0.034 |
| 4454 | SYF2         | 0.034 |
| 4455 | C14orf179    | 0.034 |
| 4456 | CPSF6        | 0.034 |
| 4457 | C7orf59      | 0.034 |
| 4458 | TMCO3        | 0.034 |
| 4459 | ZNF615       | 0.034 |
| 4460 | APBB1IP      | 0.034 |
| 4461 | GTPBP8       | 0.034 |
| 4462 | GALNT14      | 0.034 |
| 4463 | CCDC61       | 0.034 |
| 4464 | EIF2B3       | 0.034 |
| 4465 | SRPK1        | 0.034 |
| 4466 | PDCD5        | 0.034 |
| 4467 | NDUFAF3      | 0.034 |
| 4468 | GRIN3B       | 0.034 |
| 4469 | DHX35        | 0.034 |
| 4470 | ZNF784       | 0.034 |
| 4471 | ZBTB46       | 0.034 |
| 4472 | RPL32P3      | 0.034 |
| 4473 | ADO          | 0.034 |
| 4474 | TMEM87B      | 0.034 |
| 4475 | RACGAP1      | 0.034 |
| 4476 | HIVEP1       | 0.034 |
| 4477 | TMSL3        | 0.034 |
| 4478 | RGS12        | 0.034 |
| 4479 | DPYD         | 0.034 |
| 4480 | OSTF1        | 0.034 |
| 4481 | RBM34        | 0.034 |
| 4482 | TROAP        | 0.034 |
| 4483 | TM7SF3       | 0.034 |
| 4484 | FAM108A1     | 0.034 |
| 4485 | PRKD3        | 0.034 |
| 4486 | SCRIB        | 0.034 |
| 4487 | DKFZp761E198 | 0.034 |
| 4488 | FAM101B      | 0.034 |
| 4489 | ULK3         | 0.034 |
| 4490 | SLC25A43     | 0.034 |
| 4491 | DNAJC25      | 0.034 |
| 4492 | ADPRH        | 0.034 |
| 4493 | CENPW        | 0.034 |
| 4494 | RAB33B       | 0.034 |
| 4495 | RPL19        | 0.034 |
| 4496 | SLC39A11     | 0.034 |
| 4497 | DKC1         | 0.034 |
| 4498 | BUB1B        | 0.034 |
| 4499 | LEPR         | 0.034 |
| 4500 | POP7         | 0.034 |
| 4501 | CRIPAK       | 0.034 |
| 4502 | TCTA         | 0.034 |
| 4503 | CCR10        | 0.034 |
| 4504 | UHRF1BP1     | 0.034 |
| 4505 | SOCS1        | 0.034 |
| 4506 | ZNF81        | 0.034 |
| 4507 | LOC100129387 | 0.035 |
| 4508 | C16orf7      | 0.035 |

|      |           |       |
|------|-----------|-------|
| 4509 | INPP5F    | 0.035 |
| 4510 | ZNF581    | 0.035 |
| 4511 | USP34     | 0.035 |
| 4512 | TBCEL     | 0.035 |
| 4513 | ACTR3B    | 0.035 |
| 4514 | IGHMBP2   | 0.035 |
| 4515 | TBCA      | 0.035 |
| 4516 | HS6ST1    | 0.035 |
| 4517 | GFM2      | 0.035 |
| 4518 | STX10     | 0.035 |
| 4519 | SECISBP2L | 0.035 |
| 4520 | BCAP31    | 0.035 |
| 4521 | SNAPC1    | 0.035 |
| 4522 | TXNL4A    | 0.035 |
| 4523 | L3MBTL1   | 0.035 |
| 4524 | ZNF343    | 0.035 |
| 4525 | LIN54     | 0.035 |
| 4526 | HN1       | 0.035 |
| 4527 | SNAP29    | 0.035 |
| 4528 | CAMTA1    | 0.035 |
| 4529 | NRM       | 0.035 |
| 4530 | IMMT      | 0.035 |
| 4531 | C1orf109  | 0.035 |
| 4532 | MPP1      | 0.035 |
| 4533 | SPRED1    | 0.035 |
| 4534 | SGPP1     | 0.035 |
| 4535 | CHRN1     | 0.035 |
| 4536 | LENG9     | 0.035 |
| 4537 | FOXRED1   | 0.035 |
| 4538 | PACSIN1   | 0.035 |
| 4539 | THUMP2    | 0.035 |
| 4540 | SNAPC2    | 0.035 |
| 4541 | DPY19L4   | 0.035 |
| 4542 | COIL      | 0.035 |
| 4543 | KIAA0895L | 0.035 |
| 4544 | METTL2A   | 0.035 |
| 4545 | CTBP2     | 0.035 |
| 4546 | AURKAIP1  | 0.035 |
| 4547 | PPTC7     | 0.035 |
| 4548 | GALNT1    | 0.035 |
| 4549 | AMT       | 0.035 |
| 4550 | LOC645638 | 0.035 |
| 4551 | SCML1     | 0.035 |
| 4552 | CXorf57   | 0.035 |
| 4553 | RSBN1     | 0.035 |
| 4554 | MAN2C1    | 0.035 |
| 4555 | PLEKHF1   | 0.035 |
| 4556 | RAB11FIP5 | 0.036 |
| 4557 | TMEM79    | 0.036 |
| 4558 | CYBA      | 0.036 |
| 4559 | C9orf140  | 0.036 |
| 4560 | NDUFS8    | 0.036 |
| 4561 | PJA1      | 0.036 |
| 4562 | ZNF292    | 0.036 |
| 4563 | ATXN3     | 0.036 |
| 4564 | TRIM3     | 0.036 |
| 4565 | GGA1      | 0.036 |
| 4566 | UXS1      | 0.036 |
| 4567 | CDCA8     | 0.036 |
| 4568 | ZNF579    | 0.036 |
| 4569 | HHAT      | 0.036 |
| 4570 | SPOPL     | 0.036 |
| 4571 | SOCS5     | 0.036 |
| 4572 | CTBP1     | 0.036 |
| 4573 | ORC1      | 0.036 |
| 4574 | KPNA3     | 0.036 |
| 4575 | ACP6      | 0.036 |
| 4576 | DRAP1     | 0.036 |
| 4577 | BTNL9     | 0.036 |
| 4578 | RPS6KB2   | 0.036 |
| 4579 | TMEM134   | 0.036 |
| 4580 | LTA       | 0.036 |
| 4581 | CAPS      | 0.036 |
| 4582 | LMNB1     | 0.036 |
| 4583 | AVPR2     | 0.036 |
| 4584 | EEF1A1    | 0.036 |
| 4585 | HNRNPA0   | 0.036 |
| 4586 | ZNF273    | 0.036 |



|      |              |       |
|------|--------------|-------|
| 4587 | RNF115       | 0.036 |
| 4588 | RUNDC1       | 0.036 |
| 4589 | NKTR         | 0.036 |
| 4590 | GATC         | 0.036 |
| 4591 | CNKSR2       | 0.036 |
| 4592 | NR4A1        | 0.036 |
| 4593 | ANAPC13      | 0.036 |
| 4594 | KLHL28       | 0.036 |
| 4595 | MIF          | 0.036 |
| 4596 | DCHS1        | 0.036 |
| 4597 | TRIP13       | 0.036 |
| 4598 | EMR1         | 0.036 |
| 4599 | STEAP3       | 0.036 |
| 4600 | PNPO         | 0.036 |
| 4601 | C9orf142     | 0.036 |
| 4602 | CPSF3L       | 0.036 |
| 4603 | LRRC25       | 0.036 |
| 4604 | SNX24        | 0.036 |
| 4605 | MAD1L1       | 0.036 |
| 4606 | HDC          | 0.036 |
| 4607 | TMEM110      | 0.036 |
| 4608 | TLR2         | 0.036 |
| 4609 | MIER2        | 0.036 |
| 4610 | ARHGAP21     | 0.036 |
| 4611 | UIMC1        | 0.036 |
| 4612 | ZNF749       | 0.036 |
| 4613 | SPATA6       | 0.036 |
| 4614 | LOC151162    | 0.036 |
| 4615 | KIAA1370     | 0.036 |
| 4616 | CEP70        | 0.036 |
| 4617 | MEF2C        | 0.036 |
| 4618 | NDUFA3       | 0.036 |
| 4619 | ADAL         | 0.037 |
| 4620 | OSGEPL1      | 0.037 |
| 4621 | ERF          | 0.037 |
| 4622 | SLC2A11      | 0.037 |
| 4623 | HMGNS        | 0.037 |
| 4624 | LIX1         | 0.037 |
| 4625 | CRIM1        | 0.037 |
| 4626 | PRKAB2       | 0.037 |
| 4627 | ARL4C        | 0.037 |
| 4628 | PELI3        | 0.037 |
| 4629 | DMAP1        | 0.037 |
| 4630 | ASNA1        | 0.037 |
| 4631 | ZNF3         | 0.037 |
| 4632 | OXCT1        | 0.037 |
| 4633 | PPA2         | 0.037 |
| 4634 | SLC25A42     | 0.037 |
| 4635 | SLC38A11     | 0.037 |
| 4636 | TFCP2        | 0.037 |
| 4637 | ANP32E       | 0.037 |
| 4638 | C20orf195    | 0.037 |
| 4639 | MRPL37       | 0.037 |
| 4640 | KLHL26       | 0.037 |
| 4641 | SMYD4        | 0.037 |
| 4642 | TWF1         | 0.037 |
| 4643 | TRMT61B      | 0.037 |
| 4644 | TBC1D8       | 0.037 |
| 4645 | OTUD1        | 0.037 |
| 4646 | LOC100303728 | 0.037 |
| 4647 | TOP3B        | 0.037 |
| 4648 | CD101        | 0.037 |
| 4649 | RAD51C       | 0.037 |
| 4650 | SSBP4        | 0.037 |
| 4651 | TXNIP        | 0.037 |
| 4652 | LARP7        | 0.037 |
| 4653 | NGLY1        | 0.037 |
| 4654 | FANCI        | 0.037 |
| 4655 | LILRB2       | 0.037 |
| 4656 | TASP1        | 0.037 |
| 4657 | FRY          | 0.037 |
| 4658 | C18orf19     | 0.037 |
| 4659 | DET1         | 0.037 |
| 4660 | ACBD4        | 0.037 |
| 4661 | ECH1         | 0.037 |
| 4662 | SAFB2        | 0.037 |
| 4663 | PPP1R10      | 0.037 |
| 4664 | DENR         | 0.037 |

|      |              |       |
|------|--------------|-------|
| 4665 | TPRN         | 0.037 |
| 4666 | METTL1       | 0.037 |
| 4667 | MCCC2        | 0.037 |
| 4668 | MIAT         | 0.037 |
| 4669 | DIRAS1       | 0.037 |
| 4670 | ZNF688       | 0.037 |
| 4671 | SESN3        | 0.037 |
| 4672 | IKBKE        | 0.037 |
| 4673 | VPS13D       | 0.037 |
| 4674 | GCNT2        | 0.037 |
| 4675 | ERCC1        | 0.037 |
| 4676 | SPATA2L      | 0.037 |
| 4677 | YPEL2        | 0.037 |
| 4678 | RPS11        | 0.037 |
| 4679 | RNF38        | 0.037 |
| 4680 | C7orf29      | 0.037 |
| 4681 | AMN1         | 0.037 |
| 4682 | GPR174       | 0.037 |
| 4683 | SMAD9        | 0.037 |
| 4684 | PYGO2        | 0.037 |
| 4685 | TNFAIP3      | 0.037 |
| 4686 | SUMO1        | 0.037 |
| 4687 | SDHAP3       | 0.037 |
| 4688 | LOC100288069 | 0.037 |
| 4689 | PIK3R4       | 0.037 |
| 4690 | MYBPC3       | 0.038 |
| 4691 | RNPC3        | 0.038 |
| 4692 | TECPR2       | 0.038 |
| 4693 | CCDC24       | 0.038 |
| 4694 | VMP1         | 0.038 |
| 4695 | LOC100527964 | 0.038 |
| 4696 | C17orf62     | 0.038 |
| 4697 | TECTA        | 0.038 |
| 4698 | PEX13        | 0.038 |
| 4699 | NCAPG2       | 0.038 |
| 4700 | TYMS         | 0.038 |
| 4701 | MLF1IP       | 0.038 |
| 4702 | FBXL20       | 0.038 |
| 4703 | NRIP2        | 0.038 |
| 4704 | C13orf1      | 0.038 |
| 4705 | NDST2        | 0.038 |
| 4706 | PLK4         | 0.038 |
| 4707 | BCL3         | 0.038 |
| 4708 | MAMLD1       | 0.038 |
| 4709 | TFE3         | 0.038 |
| 4710 | POLR3B       | 0.038 |
| 4711 | DLG3         | 0.038 |
| 4712 | BTG3         | 0.038 |
| 4713 | UBTD2        | 0.038 |
| 4714 | GHDC         | 0.038 |
| 4715 | OSCAR        | 0.038 |
| 4716 | PGRMC1       | 0.038 |
| 4717 | EPS8         | 0.038 |
| 4718 | PRDM10       | 0.038 |
| 4719 | SLC4A8       | 0.038 |
| 4720 | C19orf53     | 0.038 |
| 4721 | CHST2        | 0.038 |
| 4722 | RANBP3       | 0.038 |
| 4723 | MEGF9        | 0.038 |
| 4724 | LOC642846    | 0.038 |
| 4725 | RPL38        | 0.038 |
| 4726 | USP27X       | 0.038 |
| 4727 | PARP10       | 0.038 |
| 4728 | C17orf90     | 0.038 |
| 4729 | C2orf42      | 0.038 |
| 4730 | PRR14        | 0.038 |
| 4731 | NLR5         | 0.038 |
| 4732 | TGFBR1       | 0.038 |
| 4733 | ABCA1        | 0.038 |
| 4734 | PCBP4        | 0.038 |
| 4735 | ABAT         | 0.038 |
| 4736 | TMEM48       | 0.038 |
| 4737 | GPC2         | 0.038 |
| 4738 | HSPE1        | 0.038 |
| 4739 | SMARCAL1     | 0.038 |
| 4740 | JOSD1        | 0.038 |
| 4741 | PLA2G6       | 0.038 |
| 4742 | FMNL2        | 0.038 |

|      |              |       |
|------|--------------|-------|
| 4743 | LOC282997    | 0.038 |
| 4744 | AHNAK2       | 0.038 |
| 4745 | BACE2        | 0.038 |
| 4746 | PDHB         | 0.038 |
| 4747 | ESRP2        | 0.038 |
| 4748 | RSRC1        | 0.038 |
| 4749 | ZNF391       | 0.038 |
| 4750 | GSK3A        | 0.038 |
| 4751 | ZNF444       | 0.038 |
| 4752 | IFT57        | 0.038 |
| 4753 | DOLPP1       | 0.038 |
| 4754 | FAM118B      | 0.038 |
| 4755 | SERAC1       | 0.038 |
| 4756 | C7orf40      | 0.038 |
| 4757 | DEM1         | 0.038 |
| 4758 | WDR81        | 0.038 |
| 4759 | BANP         | 0.038 |
| 4760 | SAMSN1       | 0.038 |
| 4761 | ETFDH        | 0.038 |
| 4762 | RPL23AP64    | 0.038 |
| 4763 | CLDND1       | 0.038 |
| 4764 | SELR1        | 0.038 |
| 4765 | C6orf1       | 0.038 |
| 4766 | RNF144A      | 0.038 |
| 4767 | GKAP1        | 0.038 |
| 4768 | LOC100129534 | 0.038 |
| 4769 | TUBA1B       | 0.038 |
| 4770 | CHMP1A       | 0.038 |
| 4771 | MINPP1       | 0.038 |
| 4772 | TMEM161A     | 0.039 |
| 4773 | MBD3         | 0.039 |
| 4774 | CENPB        | 0.039 |
| 4775 | COMMD4       | 0.039 |
| 4776 | L3MBTL4      | 0.039 |
| 4777 | LOC100132356 | 0.039 |
| 4778 | NCF4         | 0.039 |
| 4779 | KCNA6        | 0.039 |
| 4780 | STK35        | 0.039 |
| 4781 | TMEM180      | 0.039 |
| 4782 | RECQL4       | 0.039 |
| 4783 | RHOBTB3      | 0.039 |
| 4784 | LRRRC42      | 0.039 |
| 4785 | SDR39U1      | 0.039 |
| 4786 | STARD5       | 0.039 |
| 4787 | WNT10A       | 0.039 |
| 4788 | DLGAP3       | 0.039 |
| 4789 | TFDP1        | 0.039 |
| 4790 | CXCR7        | 0.039 |
| 4791 | SYMPK        | 0.039 |
| 4792 | DRG1         | 0.039 |
| 4793 | SDHAP1       | 0.039 |
| 4794 | INTS5        | 0.039 |
| 4795 | FUCA1        | 0.039 |
| 4796 | TIA1         | 0.039 |
| 4797 | GAPDHS       | 0.039 |
| 4798 | ZRSR2        | 0.039 |
| 4799 | GSTO1        | 0.039 |
| 4800 | CLPB         | 0.039 |
| 4801 | CLN8         | 0.039 |
| 4802 | FRS3         | 0.039 |
| 4803 | B4GALT5      | 0.039 |
| 4804 | SAMD12       | 0.039 |
| 4805 | NFKBIL1      | 0.039 |
| 4806 | CEP170       | 0.039 |
| 4807 | ENAH         | 0.039 |
| 4808 | PTPN12       | 0.039 |
| 4809 | ZNF544       | 0.039 |
| 4810 | R3HCC1       | 0.039 |
| 4811 | ZNF404       | 0.039 |
| 4812 | GTPBP2       | 0.039 |
| 4813 | SUSD1        | 0.039 |
| 4814 | PGCP         | 0.039 |
| 4815 | INSIG1       | 0.039 |
| 4816 | PRR24        | 0.039 |
| 4817 | ZZZ3         | 0.039 |
| 4818 | IL5RA        | 0.039 |
| 4819 | ZSCAN2       | 0.039 |
| 4820 | SF3B14       | 0.039 |

|      |              |       |
|------|--------------|-------|
| 4821 | RPS12        | 0.039 |
| 4822 | MAP3K6       | 0.039 |
| 4823 | SLC14A1      | 0.039 |
| 4824 | ZNF23        | 0.039 |
| 4825 | TDRKH        | 0.039 |
| 4826 | CDKN1C       | 0.039 |
| 4827 | IQCB1        | 0.039 |
| 4828 | KIAA1731     | 0.039 |
| 4829 | LPCAT1       | 0.039 |
| 4830 | CSTF2        | 0.039 |
| 4831 | VAMP3        | 0.039 |
| 4832 | BEX2         | 0.039 |
| 4833 | VPS4B        | 0.039 |
| 4834 | ASH1L        | 0.039 |
| 4835 | LSP1         | 0.039 |
| 4836 | PPP2R5A      | 0.039 |
| 4837 | ZNF19        | 0.039 |
| 4838 | C1orf174     | 0.039 |
| 4839 | SRRM2        | 0.039 |
| 4840 | FOXO3B       | 0.039 |
| 4841 | C14orf135    | 0.039 |
| 4842 | LOC100271722 | 0.039 |
| 4843 | NDUFA2       | 0.039 |
| 4844 | MED11        | 0.039 |
| 4845 | ARL15        | 0.039 |
| 4846 | PSMD3        | 0.039 |
| 4847 | MCM6         | 0.039 |
| 4848 | TMX2         | 0.039 |
| 4849 | CEBPA        | 0.039 |
| 4850 | TCHP         | 0.039 |
| 4851 | UTRN         | 0.040 |
| 4852 | C2orf89      | 0.040 |
| 4853 | PHF7         | 0.040 |
| 4854 | MRPL24       | 0.040 |
| 4855 | LMBR1L       | 0.040 |
| 4856 | ZNF703       | 0.040 |
| 4857 | EIF1B        | 0.040 |
| 4858 | DCC          | 0.040 |
| 4859 | TICAM1       | 0.040 |
| 4860 | TGIF2        | 0.040 |
| 4861 | FAM149B1     | 0.040 |
| 4862 | ITGA5        | 0.040 |
| 4863 | ZNF257       | 0.040 |
| 4864 | ECE2         | 0.040 |
| 4865 | PIK3C3       | 0.040 |
| 4866 | TSSK4        | 0.040 |
| 4867 | ZNF814       | 0.040 |
| 4868 | ZSCAN12      | 0.040 |
| 4869 | IFT172       | 0.040 |
| 4870 | ZNF638       | 0.040 |
| 4871 | PSME1        | 0.040 |
| 4872 | NAF1         | 0.040 |
| 4873 | DOCK11       | 0.040 |
| 4874 | FLVCR1       | 0.040 |
| 4875 | TRPM2        | 0.040 |
| 4876 | C6orf72      | 0.040 |
| 4877 | UBIAD1       | 0.040 |
| 4878 | MCM3AP-AS1   | 0.040 |
| 4879 | IPO11        | 0.040 |
| 4880 | C19orf55     | 0.040 |
| 4881 | PPIE         | 0.040 |
| 4882 | GIMAP2       | 0.040 |
| 4883 | PL-5283      | 0.040 |
| 4884 | WWOX         | 0.040 |
| 4885 | PPID         | 0.040 |
| 4886 | LOC220729    | 0.040 |
| 4887 | MBOAT1       | 0.040 |
| 4888 | AGPAT1       | 0.040 |
| 4889 | PIP5K1A      | 0.040 |
| 4890 | GATSL3       | 0.040 |
| 4891 | FAM63A       | 0.040 |
| 4892 | CARM1        | 0.040 |
| 4893 | AGK          | 0.040 |
| 4894 | H2AFY        | 0.040 |
| 4895 | AP1B1        | 0.040 |
| 4896 | SEC24B       | 0.040 |
| 4897 | CUBN         | 0.040 |
| 4898 | SPIN4        | 0.040 |

|      |                |       |
|------|----------------|-------|
| 4899 | PDZD11         | 0.040 |
| 4900 | CACNA2D4       | 0.040 |
| 4901 | TRDMT1         | 0.040 |
| 4902 | ABCC4          | 0.041 |
| 4903 | CLPP           | 0.041 |
| 4904 | CCND1          | 0.041 |
| 4905 | ZNF208         | 0.041 |
| 4906 | TLE2           | 0.041 |
| 4907 | CDK5           | 0.041 |
| 4908 | C7orf13        | 0.041 |
| 4909 | HTR3A          | 0.041 |
| 4910 | NDRG3          | 0.041 |
| 4911 | XRCC6          | 0.041 |
| 4912 | CCNF           | 0.041 |
| 4913 | EXOSC6         | 0.041 |
| 4914 | GLRX5          | 0.041 |
| 4915 | CDK5RAP3       | 0.041 |
| 4916 | COX17          | 0.041 |
| 4917 | FLJ35776       | 0.041 |
| 4918 | RCCD1          | 0.041 |
| 4919 | SIT1           | 0.041 |
| 4920 | IL15RA         | 0.041 |
| 4921 | LNX2           | 0.041 |
| 4922 | PALLD          | 0.041 |
| 4923 | TREX2          | 0.041 |
| 4924 | ARFRP1         | 0.041 |
| 4925 | PHC3           | 0.041 |
| 4926 | TNFAIP1        | 0.041 |
| 4927 | ZNF32          | 0.041 |
| 4928 | GNA11          | 0.041 |
| 4929 | WDR17          | 0.041 |
| 4930 | ZNF580         | 0.041 |
| 4931 | LYPD2          | 0.041 |
| 4932 | RASGEF1B       | 0.041 |
| 4933 | ZC3H3          | 0.041 |
| 4934 | C17orf79       | 0.041 |
| 4935 | COX8A          | 0.041 |
| 4936 | NUDT2          | 0.041 |
| 4937 | ZNF665         | 0.041 |
| 4938 | ANAPC11        | 0.041 |
| 4939 | HDAC10         | 0.041 |
| 4940 | PHACTR2        | 0.041 |
| 4941 | C17orf106-CDK3 | 0.041 |
| 4942 | ATP5J2         | 0.041 |
| 4943 | TRIM52         | 0.041 |
| 4944 | SLC35B2        | 0.041 |
| 4945 | KCTD12         | 0.041 |
| 4946 | INPP5B         | 0.041 |
| 4947 | HOXB4          | 0.041 |
| 4948 | TGFBI          | 0.041 |
| 4949 | FAM129B        | 0.041 |
| 4950 | KIF22          | 0.041 |
| 4951 | ID3            | 0.041 |
| 4952 | UTP15          | 0.041 |
| 4953 | DMXL2          | 0.041 |
| 4954 | MTRF1          | 0.041 |
| 4955 | ARFIP2         | 0.041 |
| 4956 | LOC100133991   | 0.041 |
| 4957 | LRCH3          | 0.041 |
| 4958 | USP21          | 0.041 |
| 4959 | LOC150776      | 0.041 |
| 4960 | TAPBPL         | 0.041 |
| 4961 | NUDT7          | 0.042 |
| 4962 | TYROBP         | 0.042 |
| 4963 | SDCCAG3        | 0.042 |
| 4964 | GLS2           | 0.042 |
| 4965 | DSCC1          | 0.042 |
| 4966 | DUS2L          | 0.042 |
| 4967 | MPHOSPH9       | 0.042 |
| 4968 | CCDC92         | 0.042 |
| 4969 | ZFP36L2        | 0.042 |
| 4970 | C20orf194      | 0.042 |
| 4971 | PRMT6          | 0.042 |
| 4972 | C7orf41        | 0.042 |
| 4973 | FAM96B         | 0.042 |
| 4974 | CHAD           | 0.042 |
| 4975 | MCM4           | 0.042 |
| 4976 | TK1            | 0.042 |

|      |                |       |
|------|----------------|-------|
| 4977 | GIN52          | 0.042 |
| 4978 | DHRS12         | 0.042 |
| 4979 | FANCF          | 0.042 |
| 4980 | OAS2           | 0.042 |
| 4981 | BCS1L          | 0.042 |
| 4982 | RPL18          | 0.042 |
| 4983 | SERTAD1        | 0.042 |
| 4984 | SLC16A11       | 0.042 |
| 4985 | DVL3           | 0.042 |
| 4986 | RASA4P         | 0.042 |
| 4987 | DKFZP686I15217 | 0.042 |
| 4988 | SNRPD2         | 0.042 |
| 4989 | RNF114         | 0.042 |
| 4990 | YJEFN3         | 0.042 |
| 4991 | MAP2K4         | 0.042 |
| 4992 | IMPDH2         | 0.042 |
| 4993 | TUBB2C         | 0.042 |
| 4994 | RRP36          | 0.042 |
| 4995 | APBB2          | 0.042 |
| 4996 | KLHDC1         | 0.042 |
| 4997 | PTPLAD1        | 0.042 |
| 4998 | POLR2J3        | 0.042 |
| 4999 | FXVD7          | 0.042 |
| 5000 | GDF11          | 0.042 |
| 5001 | CDT1           | 0.042 |
| 5002 | LOC386758      | 0.042 |
| 5003 | RASA3          | 0.042 |
| 5004 | CCDC141        | 0.042 |
| 5005 | LOC728730      | 0.042 |
| 5006 | ZNF225         | 0.042 |
| 5007 | FAM8A1         | 0.042 |
| 5008 | C3orf54        | 0.042 |
| 5009 | LYGG5B         | 0.042 |
| 5010 | SLC35A5        | 0.042 |
| 5011 | PHYH           | 0.042 |
| 5012 | SLC25A15       | 0.042 |
| 5013 | CD55           | 0.043 |
| 5014 | ZFAND2B        | 0.043 |
| 5015 | ARL11          | 0.043 |
| 5016 | NUMBL          | 0.043 |
| 5017 | ZNF799         | 0.043 |
| 5018 | LOC400927      | 0.043 |
| 5019 | NUDT16L1       | 0.043 |
| 5020 | PCMT1          | 0.043 |
| 5021 | STX12          | 0.043 |
| 5022 | ZBTB1          | 0.043 |
| 5023 | DNAJC4         | 0.043 |
| 5024 | EPR1           | 0.043 |
| 5025 | POC5           | 0.043 |
| 5026 | C6orf35        | 0.043 |
| 5027 | WAC            | 0.043 |
| 5028 | ATP6V0A2       | 0.043 |
| 5029 | ZNF582         | 0.043 |
| 5030 | STK11          | 0.043 |
| 5031 | KIF15          | 0.043 |
| 5032 | MAP7D2         | 0.043 |
| 5033 | PSMB4          | 0.043 |
| 5034 | C1orf201       | 0.043 |
| 5035 | GLI1           | 0.043 |
| 5036 | PRMT7          | 0.043 |
| 5037 | POMT2          | 0.043 |
| 5038 | REM2           | 0.043 |
| 5039 | ACTG1          | 0.043 |
| 5040 | CX3CR1         | 0.043 |
| 5041 | RNF170         | 0.043 |
| 5042 | MIPEP          | 0.043 |
| 5043 | LOC100216545   | 0.043 |
| 5044 | NAB1           | 0.043 |
| 5045 | GRID2IP        | 0.043 |
| 5046 | DNAJB12        | 0.043 |
| 5047 | CC2D1A         | 0.043 |
| 5048 | RASA1          | 0.043 |
| 5049 | TC2N           | 0.044 |
| 5050 | MCM10          | 0.044 |
| 5051 | ZNRD1-AS1      | 0.044 |
| 5052 | AIF1           | 0.044 |
| 5053 | RSPO1          | 0.044 |
| 5054 | MLH1           | 0.044 |

|      |              |       |
|------|--------------|-------|
| 5055 | CAMLG        | 0.044 |
| 5056 | SLC22A18     | 0.044 |
| 5057 | EFHA1        | 0.044 |
| 5058 | CAMKMT       | 0.044 |
| 5059 | DNAJA2       | 0.044 |
| 5060 | VDAC2        | 0.044 |
| 5061 | OGFR         | 0.044 |
| 5062 | SMAP2        | 0.044 |
| 5063 | MYO1B        | 0.044 |
| 5064 | NR2C2AP      | 0.044 |
| 5065 | FLYWCH2      | 0.044 |
| 5066 | TAL1         | 0.044 |
| 5067 | STK17B       | 0.044 |
| 5068 | ZNF839       | 0.044 |
| 5069 | MIF4GD       | 0.044 |
| 5070 | KCTD17       | 0.044 |
| 5071 | ACER3        | 0.044 |
| 5072 | CLIP4        | 0.044 |
| 5073 | CHM          | 0.044 |
| 5074 | ZDHHC5       | 0.044 |
| 5075 | KIAA0564     | 0.044 |
| 5076 | GPD2         | 0.044 |
| 5077 | SAMD4A       | 0.044 |
| 5078 | C16orf75     | 0.044 |
| 5079 | DNAJC17      | 0.044 |
| 5080 | ST3GAL5      | 0.044 |
| 5081 | PIGO         | 0.044 |
| 5082 | GATM         | 0.044 |
| 5083 | TCEB1        | 0.044 |
| 5084 | ZNF30        | 0.044 |
| 5085 | FNIP2        | 0.044 |
| 5086 | FAM195B      | 0.044 |
| 5087 | C1orf86      | 0.044 |
| 5088 | RLIM         | 0.044 |
| 5089 | UBA1         | 0.044 |
| 5090 | LOC100129726 | 0.044 |
| 5091 | KIAA0284     | 0.044 |
| 5092 | STAT2        | 0.044 |
| 5093 | TTC9C        | 0.044 |
| 5094 | NXPH4        | 0.044 |
| 5095 | ATM          | 0.044 |
| 5096 | WDHD1        | 0.044 |
| 5097 | FAM190A      | 0.044 |
| 5098 | ZBTB11       | 0.044 |
| 5099 | RASL11A      | 0.044 |
| 5100 | FBX05        | 0.044 |
| 5101 | EXOC8        | 0.044 |
| 5102 | HMGCL        | 0.044 |
| 5103 | CST3         | 0.044 |
| 5104 | KIAA1712     | 0.044 |
| 5105 | LRRRC27      | 0.044 |
| 5106 | NF1          | 0.044 |
| 5107 | TMEM159      | 0.044 |
| 5108 | NTNG2        | 0.044 |
| 5109 | ZNF44        | 0.044 |
| 5110 | NPAT         | 0.044 |
| 5111 | MTPAP        | 0.044 |
| 5112 | DOK2         | 0.044 |
| 5113 | VKORC1L1     | 0.045 |
| 5114 | C15orf23     | 0.045 |
| 5115 | PRR5L        | 0.045 |
| 5116 | C6orf57      | 0.045 |
| 5117 | LRDD         | 0.045 |
| 5118 | RALY         | 0.045 |
| 5119 | TMTC1        | 0.045 |
| 5120 | ZDHHC13      | 0.045 |
| 5121 | NIPSNAP3B    | 0.045 |
| 5122 | NEAT1        | 0.045 |
| 5123 | RUVBL2       | 0.045 |
| 5124 | SNRPG        | 0.045 |
| 5125 | COL7A1       | 0.045 |
| 5126 | MRE11A       | 0.045 |
| 5127 | CYHR1        | 0.045 |
| 5128 | ZNF546       | 0.045 |
| 5129 | NFAT5        | 0.045 |
| 5130 | UBL3         | 0.045 |
| 5131 | RCOR1        | 0.045 |
| 5132 | GSTCD        | 0.045 |

|      |              |       |
|------|--------------|-------|
| 5133 | C5orf25      | 0.045 |
| 5134 | TRMT11       | 0.045 |
| 5135 | KIAA0174     | 0.045 |
| 5136 | MRPS11       | 0.045 |
| 5137 | GNPDA2       | 0.045 |
| 5138 | LYPLAL1      | 0.045 |
| 5139 | THAP3        | 0.045 |
| 5140 | LIMD1        | 0.045 |
| 5141 | MACF1        | 0.045 |
| 5142 | XAF1         | 0.045 |
| 5143 | C1GALT1      | 0.045 |
| 5144 | SASH3        | 0.045 |
| 5145 | SLC35B3      | 0.045 |
| 5146 | CCT6P1       | 0.045 |
| 5147 | SLC25A36     | 0.045 |
| 5148 | C3           | 0.045 |
| 5149 | ZWILCH       | 0.045 |
| 5150 | TMEM65       | 0.045 |
| 5151 | NDOR1        | 0.045 |
| 5152 | PAK2         | 0.045 |
| 5153 | NIT1         | 0.045 |
| 5154 | ANK3         | 0.045 |
| 5155 | NUTF2        | 0.045 |
| 5156 | CNTROB       | 0.045 |
| 5157 | CLC          | 0.045 |
| 5158 | OSBPL11      | 0.046 |
| 5159 | ALAS1        | 0.046 |
| 5160 | PAQR7        | 0.046 |
| 5161 | MEAF6        | 0.046 |
| 5162 | DLG4         | 0.046 |
| 5163 | TRPM7        | 0.046 |
| 5164 | RNASEK       | 0.046 |
| 5165 | MLL          | 0.046 |
| 5166 | LOC100499489 | 0.046 |
| 5167 | UGCG         | 0.046 |
| 5168 | SLC38A1      | 0.046 |
| 5169 | C5           | 0.046 |
| 5170 | LAMTOR2      | 0.046 |
| 5171 | KIAA1432     | 0.046 |
| 5172 | RRNAD1       | 0.046 |
| 5173 | GLRX2        | 0.046 |
| 5174 | NOTCH2NL     | 0.046 |
| 5175 | USP13        | 0.046 |
| 5176 | CCDC34       | 0.046 |
| 5177 | MMS19        | 0.046 |
| 5178 | ZFAND2A      | 0.046 |
| 5179 | UBE2S        | 0.046 |
| 5180 | ZNF37BP      | 0.046 |
| 5181 | STBD1        | 0.046 |
| 5182 | THSD1P1      | 0.046 |
| 5183 | RAPGEF5      | 0.046 |
| 5184 | TBCC         | 0.046 |
| 5185 | MFHAS1       | 0.046 |
| 5186 | MAGOHB       | 0.046 |
| 5187 | SAFB         | 0.046 |
| 5188 | PSMC4        | 0.046 |
| 5189 | DIRC2        | 0.046 |
| 5190 | BRWD1        | 0.046 |
| 5191 | RXRA         | 0.046 |
| 5192 | C7orf26      | 0.046 |
| 5193 | VBP1         | 0.046 |
| 5194 | DMD          | 0.046 |
| 5195 | LTBR         | 0.046 |
| 5196 | ITPRIP       | 0.046 |
| 5197 | MOV10        | 0.046 |
| 5198 | VPS54        | 0.046 |
| 5199 | SPTAN1       | 0.046 |
| 5200 | ZNF207       | 0.046 |
| 5201 | BDP1         | 0.046 |
| 5202 | VPS52        | 0.046 |
| 5203 | ZNF90        | 0.046 |
| 5204 | TTC39B       | 0.046 |
| 5205 | ZNF624       | 0.046 |
| 5206 | RNF144B      | 0.046 |
| 5207 | IKZF2        | 0.046 |
| 5208 | FUT10        | 0.047 |
| 5209 | GUCY1A3      | 0.047 |
| 5210 | IFT88        | 0.047 |



|      |           |       |
|------|-----------|-------|
| 5211 | LUC7L     | 0.047 |
| 5212 | ZNF623    | 0.047 |
| 5213 | RAB8B     | 0.047 |
| 5214 | GNG3      | 0.047 |
| 5215 | SLC22A23  | 0.047 |
| 5216 | TSEN15    | 0.047 |
| 5217 | AGPAT2    | 0.047 |
| 5218 | ROGDI     | 0.047 |
| 5219 | VANGL1    | 0.047 |
| 5220 | FBXO2     | 0.047 |
| 5221 | CKAP5     | 0.047 |
| 5222 | ZNF35     | 0.047 |
| 5223 | TDRD7     | 0.047 |
| 5224 | MAFB      | 0.047 |
| 5225 | LOC339929 | 0.047 |
| 5226 | SOLH      | 0.047 |
| 5227 | MALAT1    | 0.047 |
| 5228 | ZNF250    | 0.047 |
| 5229 | ZNF672    | 0.047 |
| 5230 | KIAA1908  | 0.047 |
| 5231 | RPA3      | 0.047 |
| 5232 | HELB      | 0.048 |
| 5233 | C9orf95   | 0.048 |
| 5234 | CKS1B     | 0.048 |
| 5235 | BCCIP     | 0.048 |
| 5236 | UBE2C     | 0.048 |
| 5237 | ZNF468    | 0.048 |
| 5238 | UBQLN2    | 0.048 |
| 5239 | PLCG1     | 0.048 |
| 5240 | RALGAPA1  | 0.048 |
| 5241 | LOC283922 | 0.048 |
| 5242 | PIGH      | 0.048 |
| 5243 | KIAA0748  | 0.048 |
| 5244 | PRKCH     | 0.048 |
| 5245 | TBCB      | 0.048 |
| 5246 | GUCA1B    | 0.048 |
| 5247 | CUL7      | 0.048 |
| 5248 | ECD       | 0.048 |
| 5249 | CORO2A    | 0.048 |
| 5250 | METAP2    | 0.048 |
| 5251 | FAM127B   | 0.048 |
| 5252 | ITFG3     | 0.048 |
| 5253 | PARP9     | 0.048 |
| 5254 | DNAJC6    | 0.048 |
| 5255 | ZNF609    | 0.048 |
| 5256 | PPWD1     | 0.048 |

Supplementary Table S4. Changes in Classic B Cell Phenotypes. Significant changes were seen in percentages of CD19+CD27- naïve B cells, CD19+CD27+ memory B cells, CD27++CD38++CD20loCD138- plasmablasts and CD27++CD38++CD20loCD138+ plasma cells after vaccination as measured by flow cytometry and a variant of the EDGE method by Storey et al. P-values show significant changes in plasmablast populations in all subjects except S05, which showed a significant change in Memory B cell populations, but not the other cell types. Significant changes were seen in plasma cell populations in all subjects except S05. The p-value for change in plasma cell populations in S02 was 0.06, despite a large increase in plasma cells. This may have been because despite the magnitude of the change, only two timepoints were increased from baseline. Phenotypic changes preceded evident serum anti-vaccine antibody level changes.

| Subject | Measure         | Naïve  | Memory | Plasmablast | Plasma Cell |
|---------|-----------------|--------|--------|-------------|-------------|
| S02     | Day of Increase | 5      | -      | 5           | 5           |
|         | p-value         | 0.0369 | 0.2787 | 0.0044      | 0.0604      |
| S03     | Day of Increase | -      | -      | 6           | 6           |
|         | p-value         | 0.4434 | 0.0906 | 0.0189      | 0.0017      |
| S04     | Day of Increase | -      | -      | 6           | 5           |
|         | p-value         | 0.3943 | 0.3691 | 0.007       | 0.0002      |
| S05     | Day of Increase | -      | 3      | -           | -           |
|         | p-value         | 0.1779 | 0.0305 | 0.1251      | 0.0985      |
| S06     | Day of Increase | -      | -      | 10          | 9           |
|         | p-value         | 0.406  | 0.7775 | 0.009       | 0.016       |

*Supplementary Table S5. Correlation analysis of qRT-PCR gene expression data and cellular phenotype as assessed by FACS. Pearson correlation test and Benjamini-Hochberg multiple testing procedure is applied to control FDR at 0.05 level. Individual genes in S07, S08, S10 and S12 were found to correlate with the percentage of CD19loCD20loCD27++CD38++CD138+ plasma cells, CD19loCD20loCD27++CD38++CD138- plasmablasts or CD19+CD20+CD27+CD38+CD138- memory B cell subpopulations.*

| <u>Subject</u> | <u>PCR</u> | <u>Cell Subpopulation</u> | <u>cor.coef</u> | <u>adj.pval</u> |
|----------------|------------|---------------------------|-----------------|-----------------|
| S12            | CD38       | plasmablast               | 0.8936          | 0.0287          |
| S12            | IRF4       | plasmablast               | 0.8535          | 0.0491          |
| S12            | XBP1       | plasmablast               | 0.9431          | 0.0059          |
| S07            | IRF8       | naiveBCell                | 0.8602          | 0.0308          |
| S07            | PAX5       | naiveBCell                | 0.8706          | 0.0262          |
| S07            | CD27       | plasmablast               | 0.9098          | 0.0143          |
| S07            | CD38       | plasmablast               | 0.9042          | 0.0143          |
| S07            | CD59       | plasmablast               | 0.8370          | 0.0442          |
| S07            | IRF4       | plasmablast               | 0.8513          | 0.0346          |
| S07            | XBP1       | plasmablast               | 0.8756          | 0.0262          |
| S07            | CD27       | plasmaCell                | 0.9195          | 0.0143          |
| S07            | SDC1       | plasmaCell                | 0.8740          | 0.0262          |
| S08            | CD27       | plasmablast               | 0.8422          | 0.0333          |
| S08            | CD38       | plasmablast               | 0.8490          | 0.0331          |
| S08            | PRDM1      | plasmablast               | 0.8573          | 0.0326          |
| S08            | XBP1       | plasmablast               | 0.8850          | 0.0171          |
| S08            | PRDM1      | plasmaCell                | 0.9147          | 0.0089          |
| S08            | SDC1       | plasmaCell                | 0.9098          | 0.0089          |
| S08            | CD27       | plasmablast               | 0.8422          | 0.0333          |
| S08            | CD38       | plasmablast               | 0.8490          | 0.0331          |
| S08            | PRDM1      | plasmablast               | 0.8573          | 0.0326          |
| S08            | XBP1       | plasmablast               | 0.8850          | 0.0171          |
| S08            | PRDM1      | plasmaCell                | 0.9147          | 0.0089          |

Supplementary Table S6. Genes in the plasma cell gene signature (PCgs), their adjusted p-values and correlation with percentage of CD19+ CD27hi CD38hi CD138- plasmablasts and CD19lo CD27hi CD38hi CD138+ plasma cell populations for each subject. Pearson correlation tests with Benjamini-Hochberg testing procedure was applied to control FDR at 0.05 level. 2033 Genes Differentially Expressed between CD27lo and CD27hi in vitro activated human memory B cell subsets (microarray). Also, the common significant gene sets between in vivo RNA Seq and in vitro microarray data. (N.C. = Not correlated)

| 742 gene | S02 Plasma Cell |          |          | S03 Plasma Cell |          |          | S04 Plasma Cell |          |          | S02 Plasmablast |          |          | S03 Plasmablast |          |          | S04 Plasmablast |          |          | Common<br>CD27lo/CD27hi and PCgs |
|----------|-----------------|----------|----------|-----------------|----------|----------|-----------------|----------|----------|-----------------|----------|----------|-----------------|----------|----------|-----------------|----------|----------|----------------------------------|
|          | Adj.pval        | Cor.coef | Adj.pval | Cor.coef        | Adj.pval | Cor.coef | Adj.pval        | Cor.coef | Adj.pval | Cor.coef        | Adj.pval | Cor.coef | Adj.pval        | Cor.coef | Adj.pval | Cor.coef        | Adj.pval | Cor.coef |                                  |
| IGHG1    | 0.00004         | 0.95243  | 0.00810  | 0.90380         | 0.00191  | 0.89799  | 0.00180         | 0.86002  | 0.04307  | 0.73347         | N.C.     | N.C.     | N.C.            | N.C.     | N.C.     | N.C.            | N.C.     | N.C.     | ABCB9                            |
| CD38     | <0.00001        | 0.99285  | 0.01180  | 0.87170         | 0.00020  | 0.95712  | 0.00019         | 0.92613  | 0.04137  | 0.73750         | 0.03311  | 0.75260  | N.C.            | N.C.     | N.C.     | N.C.            | N.C.     | N.C.     | ADRBK2                           |
| FER1L4   | <0.00001        | 0.97500  | 0.02218  | 0.81170         | 0.00230  | 0.89261  | 0.00085         | 0.88723  | 0.03346  | 0.76440         | N.C.     | N.C.     | N.C.            | N.C.     | N.C.     | N.C.            | N.C.     | N.C.     | AFF3                             |
| SPARC    | 0.00006         | 0.94755  | 0.02699  | 0.79006         | 0.00059  | 0.92980  | 0.00358         | 0.82732  | 0.03887  | 0.74558         | N.C.     | N.C.     | N.C.            | N.C.     | N.C.     | N.C.            | N.C.     | N.C.     | AIM1                             |
| SDC1     | <0.00001        | 0.97976  | 0.00715  | 0.92912         | 0.00080  | 0.92261  | 0.00125         | 0.87423  | N.C.     | N.C.            | N.C.     | N.C.     | N.C.            | N.C.     | N.C.     | N.C.            | N.C.     | N.C.     | ALG2                             |
| FAM171A1 | 0.00003         | 0.95653  | 0.00827  | 0.89905         | 0.00023  | 0.95192  | 0.00023         | 0.92130  | N.C.     | N.C.            | N.C.     | N.C.     | N.C.            | N.C.     | N.C.     | N.C.            | N.C.     | N.C.     | ALG3                             |
| CCR2     | <0.00001        | 0.99020  | 0.04003  | 0.74072         | 0.00063  | 0.92854  | 0.00006         | 0.94651  | N.C.     | N.C.            | N.C.     | N.C.     | N.C.            | N.C.     | N.C.     | N.C.            | N.C.     | N.C.     | ALOX5                            |
| UNC13B   | <0.00001        | 0.98457  | N.C.     | N.C.            | 0.00038  | 0.94042  | 0.00004         | 0.95149  | N.C.     | N.C.            | N.C.     | N.C.     | N.C.            | N.C.     | N.C.     | N.C.            | N.C.     | N.C.     | ANAPC5                           |
| CAV1     | <0.00001        | 0.99515  | 0.00715  | 0.91928         | 0.00011  | 0.97003  | 0.00024         | 0.92054  | 0.02228  | 0.81137         | N.C.     | N.C.     | N.C.            | N.C.     | N.C.     | N.C.            | N.C.     | N.C.     | APOL1                            |
| GLDC     | <0.00001        | 0.99191  | 0.01081  | 0.87954         | 0.00442  | 0.86909  | 0.00011         | 0.93577  | 0.02147  | 0.81690         | 0.03095  | 0.75797  | N.C.            | N.C.     | N.C.     | N.C.            | N.C.     | N.C.     | ARCN1                            |
| SLC16A14 | <0.00001        | 0.98270  | 0.02706  | 0.78950         | 0.00087  | 0.91951  | 0.00050         | 0.90237  | N.C.     | N.C.            | N.C.     | N.C.     | N.C.            | N.C.     | N.C.     | N.C.            | N.C.     | N.C.     | ARF1                             |
| WNT5B    | 0.00003         | 0.95672  | 0.01122  | 0.87680         | 0.00583  | 0.85801  | 0.00025         | 0.91945  | N.C.     | N.C.            | N.C.     | N.C.     | N.C.            | N.C.     | N.C.     | N.C.            | N.C.     | N.C.     | ARF4                             |
| CXCR3    | 0.00011         | 0.93596  | 0.01659  | 0.84089         | 0.00693  | 0.85010  | 0.00025         | 0.91961  | 0.03101  | 0.77145         | N.C.     | N.C.     | N.C.            | N.C.     | N.C.     | N.C.            | N.C.     | N.C.     | ARFGAP3                          |
| DUSP5    | <0.00001        | 0.99373  | 0.01741  | 0.83385         | 0.01206  | 0.82134  | 0.00013         | 0.93260  | 0.03653  | 0.75379         | 0.00928  | 0.83524  | N.C.            | N.C.     | N.C.     | N.C.            | N.C.     | N.C.     | ARHGAP17                         |
| ABCB9    | 0.00002         | 0.96247  | 0.01934  | 0.82553         | 0.00466  | 0.86663  | 0.00004         | 0.95446  | N.C.     | N.C.            | 0.01927  | 0.79354  | N.C.            | N.C.     | N.C.     | N.C.            | N.C.     | N.C.     | ARHGAP9                          |
| GGH      | <0.00001        | 0.99305  | 0.00923  | 0.89153         | 0.01534  | 0.80807  | 0.00003         | 0.95742  | 0.04042  | 0.73972         | 0.00453  | 0.86794  | N.C.            | N.C.     | N.C.     | N.C.            | N.C.     | N.C.     | ARL1                             |
| TXNDC5   | <0.00001        | 0.99136  | 0.00715  | 0.92335         | 0.00324  | 0.88051  | 0.00006         | 0.94794  | 0.02161  | 0.81591         | N.C.     | N.C.     | N.C.            | N.C.     | N.C.     | N.C.            | N.C.     | N.C.     | ARMCX3                           |
| CHPF     | <0.00001        | 0.98587  | 0.00810  | 0.90356         | 0.00015  | 0.96682  | 0.00006         | 0.94581  | 0.01880  | 0.82763         | N.C.     | N.C.     | N.C.            | N.C.     | N.C.     | N.C.            | N.C.     | N.C.     | ARRDC2                           |
| IGF1     | <0.00001        | 0.99269  | 0.03403  | 0.76231         | 0.00556  | 0.86006  | 0.00027         | 0.91761  | N.C.     | N.C.            | N.C.     | N.C.     | N.C.            | N.C.     | N.C.     | N.C.            | N.C.     | N.C.     | ATAD2B                           |
| SDF2L1   | 0.00001         | 0.97451  | 0.02191  | 0.81415         | 0.00200  | 0.89659  | 0.00001         | 0.96775  | 0.02711  | 0.78834         | 0.01915  | 0.79405  | N.C.            | N.C.     | N.C.     | N.C.            | N.C.     | N.C.     | ATF6                             |
| PDIA4    | <0.00001        | 0.99506  | 0.00923  | 0.89098         | 0.00023  | 0.95179  | 0.00005         | 0.94907  | 0.02525  | 0.79808         | 0.04763  | 0.72051  | N.C.            | N.C.     | N.C.     | N.C.            | N.C.     | N.C.     | ATP5G1                           |
| XBP1     | <0.00001        | 0.99739  | 0.00953  | 0.88859         | 0.00027  | 0.94740  | 0.00008         | 0.94138  | 0.02658  | 0.79147         | 0.03406  | 0.75029  | N.C.            | N.C.     | N.C.     | N.C.            | N.C.     | N.C.     | ATP6A1                           |
| BMP6     | <0.00001        | 0.98932  | 0.00715  | 0.92407         | 0.01096  | 0.82687  | 0.00023         | 0.92168  | 0.01741  | 0.83372         | 0.02748  | 0.76773  | N.C.            | N.C.     | N.C.     | N.C.            | N.C.     | N.C.     | ATP1F1                           |
| ELL2     | <0.00001        | 0.99765  | 0.01045  | 0.88117         | 0.00073  | 0.92474  | 0.00007         | 0.94487  | 0.02798  | 0.78371         | 0.02760  | 0.76733  | N.C.            | N.C.     | N.C.     | N.C.            | N.C.     | N.C.     | ATXN1                            |
| TSHR     | 0.00001         | 0.96789  | 0.01090  | 0.87838         | 0.00558  | 0.85974  | 0.00095         | 0.88343  | N.C.     | N.C.            | 0.02949  | 0.76214  | N.C.            | N.C.     | N.C.     | N.C.            | N.C.     | N.C.     | B2M                              |
| PDIA5    | <0.00001        | 0.99003  | 0.00731  | 0.91596         | 0.00025  | 0.94904  | 0.00042         | 0.90706  | 0.03964  | 0.74256         | N.C.     | N.C.     | N.C.            | N.C.     | N.C.     | N.C.            | N.C.     | N.C.     | B4GALT1                          |
| FNDC3B   | <0.00001        | 0.98187  | 0.01441  | 0.85911         | 0.00008  | 0.97587  | 0.00074         | 0.89134  | N.C.     | N.C.            | N.C.     | N.C.     | N.C.            | N.C.     | N.C.     | N.C.            | N.C.     | N.C.     | B4GALT3                          |
| MOXD1    | <0.00001        | 0.99407  | 0.00810  | 0.90421         | 0.00020  | 0.95746  | 0.00008         | 0.94143  | 0.04101  | 0.73851         | N.C.     | N.C.     | N.C.            | N.C.     | N.C.     | N.C.            | N.C.     | N.C.     | B9D1                             |
| IGHG3    | <0.00001        | 0.97966  | 0.00810  | 0.90453         | 0.00669  | 0.85148  | 0.00043         | 0.90626  | 0.03639  | 0.75474         | N.C.     | N.C.     | N.C.            | N.C.     | N.C.     | N.C.            | N.C.     | N.C.     | BACH2                            |
| VDR      | <0.00001        | 0.97713  | 0.04774  | 0.72180         | 0.00039  | 0.93962  | 0.00001         | 0.96740  | N.C.     | N.C.            | 0.04239  | 0.73102  | N.C.            | N.C.     | N.C.     | N.C.            | N.C.     | N.C.     | BAG1                             |
| HSP90B1  | <0.00001        | 0.99651  | 0.00962  | 0.88697         | 0.00053  | 0.93236  | 0.00011         | 0.93560  | 0.03235  | 0.76775         | 0.03446  | 0.74903  | N.C.            | N.C.     | N.C.     | N.C.            | N.C.     | N.C.     | BANK1                            |
| MANF     | <0.00001        | 0.97971  | 0.02658  | 0.79127         | 0.00038  | 0.94067  | 0.00002         | 0.96535  | 0.02841  | 0.78164         | 0.03711  | 0.74274  | N.C.            | N.C.     | N.C.     | N.C.            | N.C.     | N.C.     | BCL11A                           |
| FKBP11   | <0.00001        | 0.99491  | 0.00715  | 0.92371         | 0.00018  | 0.96096  | 0.00011         | 0.93614  | 0.02208  | 0.81266         | N.C.     | N.C.     | N.C.            | N.C.     | N.C.     | N.C.            | N.C.     | N.C.     | BCL2                             |
| NET1     | 0.00004         | 0.95494  | 0.03842  | 0.74670         | 0.00092  | 0.91764  | 0.00002         | 0.96538  | 0.03964  | 0.74268         | 0.01796  | 0.79800  | N.C.            | N.C.     | N.C.     | N.C.            | N.C.     | N.C.     | BMP6                             |
| CHAC2    | <0.00001        | 0.97652  | 0.01632  | 0.84317         | 0.00146  | 0.90548  | 0.00003         | 0.95884  | 0.02457  | 0.80169         | 0.02646  | 0.77042  | N.C.            | N.C.     | N.C.     | N.C.            | N.C.     | N.C.     | BRP44L                           |
| RRBP1    | <0.00001        | 0.99535  | 0.01032  | 0.88395         | 0.00142  | 0.90626  | 0.00007         | 0.94417  | 0.02957  | 0.77654         | N.C.     | N.C.     | N.C.            | N.C.     | N.C.     | N.C.            | N.C.     | N.C.     | BSG                              |
| SMOX     | <0.00001        | 0.98674  | 0.00856  | 0.89711         | 0.00733  | 0.84713  | 0.00018         | 0.92699  | 0.03139  | 0.76993         | 0.04734  | 0.72114  | N.C.            | N.C.     | N.C.     | N.C.            | N.C.     | N.C.     | C11orf10                         |
| GF11     | <0.00001        | 0.98771  | 0.02469  | 0.80122         | 0.00023  | 0.95321  | 0.00017         | 0.92759  | 0.03890  | 0.74457         | N.C.     | N.C.     | N.C.            | N.C.     | N.C.     | N.C.            | N.C.     | N.C.     | C13orf18                         |
| SLAMF7   | <0.00001        | 0.99022  | 0.00827  | 0.89898         | 0.00016  | 0.96284  | 0.00024         | 0.92057  | 0.02782  | 0.78524         | N.C.     | N.C.     | N.C.            | N.C.     | N.C.     | N.C.            | N.C.     | N.C.     | C15orf24                         |
| MZB1     | <0.00001        | 0.98909  | 0.00715  | 0.92282         | 0.00015  | 0.96534  | 0.00033         | 0.91285  | 0.02573  | 0.79534         | N.C.     | N.C.     | N.C.            | N.C.     | N.C.     | N.C.            | N.C.     | N.C.     | C17orf28                         |
| BHLHA15  | <0.00001        | 0.98359  | 0.00227  | 0.95716         | 0.00016  | 0.96370  | 0.00010         | 0.93809  | 0.01686  | 0.83798         | N.C.     | N.C.     | N.C.            | N.C.     | N.C.     | N.C.            | N.C.     | N.C.     | C1orf85                          |
| ITM2C    | <0.00001        | 0.99489  | 0.00715  | 0.92927         | 0.00011  | 0.96997  | 0.00023         | 0.92162  | 0.02445  | 0.80237         | N.C.     | N.C.     | N.C.            | N.C.     | N.C.     | N.C.            | N.C.     | N.C.     | C6orf129                         |
| B9D1     | <0.00001        | 0.98458  | 0.01686  | 0.83685         | 0.00034  | 0.94366  | 0.00026         | 0.91831  | N.C.     | N.C.            | N.C.     | N.C.     | N.C.            | N.C.     | N.C.     | N.C.            | N.C.     | N.C.     | CALR                             |
| CKAP4    | <0.00001        | 0.99199  | 0.00810  | 0.90540         | 0.00045  | 0.93581  | 0.00003         | 0.95888  | 0.01934  | 0.82564         | N.C.     | N.C.     | N.C.            | N.C.     | N.C.     | N.C.            | N.C.     | N.C.     | CALU                             |
| SEC11C   | <0.00001        | 0.99717  | 0.01045  | 0.88269         | 0.00015  | 0.96572  | 0.00012         | 0.93452  | 0.02523  | 0.79839         | 0.04993  | 0.71638  | N.C.            | N.C.     | N.C.     | N.C.            | N.C.     | N.C.     | CAMK2D                           |
| NOM2     | <0.00001        | 0.98468  | 0.01441  | 0.85737         | 0.00429  | 0.87004  | 0.00049         | 0.90289  | 0.04743  | 0.72246         | N.C.     | N.C.     | N.C.            | N.C.     | N.C.     | N.C.            | N.C.     | N.C.     | CANX                             |
| TNFRSF17 | <0.00001        | 0.99599  | 0.01178  | 0.87215         | 0.00130  | 0.90862  | 0.00005         | 0.94854  | 0.02217  | 0.81194         | 0.01633  | 0.80365  | N.C.            | N.C.     | N.C.     | N.C.            | N.C.     | N.C.     | CASP10                           |
| UCHL1    | 0.00008         | 0.94138  | 0.01285  | 0.86623         | 0.00025  | 0.94898  | 0.00001         | 0.96676  | 0.01619  | 0.84638         | N.C.     | N.C.     | N.C.            | N.C.     | N.C.     | N.C.            | N.C.     | N.C.     | CAV1                             |
| WIP1     | <0.00001        | 0.98660  | 0.01602  | 0.84874         | 0.00004  | 0.98729  | 0.00023         | 0.92147  | N.C.     | N.C.            | N.C.     | N.C.     | N.C.            | N.C.     | N.C.     | N.C.            | N.C.     | N.C.     | CCDC117                          |
| CRELD2   | 0.00003         | 0.95768  | 0.00856  | 0.89630         | 0.00060  | 0.92929  | 0.00004         | 0.95149  | 0.02324  | 0.80721         | N.C.     | N.C.     | N.C.            | N.C.     | N.C.     | N.C.            | N.C.     | N.C.     | CCDC69                           |
| PRDX4    | <0.00001        | 0.99008  | 0.00715  | 0.93555         | 0.00008  | 0.97949  | 0.00021         | 0.92392  | 0.02573  | 0.79561         | N.C.     | N.C.     | N.C.            | N.C.     | N.C.     | N.C.            | N.C.     | N.C.     | CD19                             |
| SEC24A   | <0.00001        | 0.99581  | 0.00715  | 0.91881         | 0.00008  | 0.97438  | 0.00010         | 0.93860  | 0.02994  | 0.77496         | N.C.     | N.C.     | N.C.            | N.C.     | N.C.     | N.C.            | N.C.     | N.C.     | CD22                             |
| TMEM184B | <0.00001        | 0.99325  | 0.02573  | 0.79564         | 0.00058  | 0.93014  | 0.00006         | 0.94711  | N.C.     | N.C.            | N.C.     | N.C.     | N.C.            | N.C.     | N.C.     | N.C.            | N.C.     | N.C.     | CD27                             |
| PPIB     | <0.00001        | 0.99677  | 0.00810  | 0.90248         | 0.00036  | 0.94225  | 0.00006         | 0.94683  | 0.02199  | 0.81347         | 0.04046  | 0.73478  | N.C.            | N.C.     | N.C.     | N.C.            | N.C.     | N.C.     | CD38                             |
| OAF      | 0.00022         | 0.92220  | 0.01619  | 0.84603         | 0.00008  | 0.97750  | 0.00009         | 0.93999  | 0.04431  | 0.73022         | N.C.     | N.C.     | N.C.            | N.C.     | N.C.     | N.C.            | N.C.     | N.C.     | CD59                             |
| MAN1A1   | <0.00001        | 0.99674  | 0.00827  | 0.90033         | 0.00023  | 0.95264  | 0.00007         | 0.94472  | 0.02913  | 0.77881         | 0.03196  | 0.75513  | N.C.            | N.C.     | N.C.     | N.C.            | N.C.     | N.C.     | CDCA7L                           |
| AQP3     | 0.00003         | 0.95945  | 0.03653  | 0.75378         | 0.00644  | 0.85352  | 0.00002         | 0.96297  | 0.02711  | 0.78851         | 0.03844  | 0.73971  | N.C.            | N.C.     | N.C.     | N.C.            | N.C.     | N.C.     | CECR1                            |
| RBM47    | <0.00001        | 0.99737  | 0.01659  | 0.84087         | 0.00084  | 0.92116  | 0.00009         | 0.93914  | N.C.     | N.C.            | 0.04160  | 0.73246  | N.C.            | N.C.     | N.C.     | N.C.            | N.C.     | N.C.     | CHCHD2                           |
| SLC44A1  | <0.00001        | 0.99588  | 0.00827  | 0.89927         | 0.00053  | 0.93203  | 0.00006         | 0.94806  | 0.02523  | 0.79847         | 0.04000  | 0.73580  | N.C.            | N.C.     | N.C.     | N.C.            | N.C.     | N.C.     | CHD3                             |
| ST7      | 0.00020         | 0.92440  | N.C.     | N.C.            | 0.00038  | 0.93997  | 0.00042         | 0.90674  | N.C.     | N.C.            | N.C.     | N.C.     | N.C.            | N.C.     | N.C.     | N.C.            | N.C.     | N.C.     | CHPF                             |
| TRAM2    | <0.00001        | 0.99736  | 0.01519  | 0.85283         | 0.00085  | 0.92032  | 0.00005         | 0.95069  | 0.03669  | 0.75262         | 0.01482  | 0.81005  | N.C.            | N.C.     | N.C.     | N.C.            | N.C.     | N.C.     | CHST12                           |
| GALNT14  | 0.00505         | 0.80949  | 0.01343  | 0.86363         | 0.00801  | 0.84264  | 0.00074         | 0        |          |                 |          |          |                 |          |          |                 |          |          |                                  |

|           |           |         |         |         |         |         |           |         |         |         |         |         |          |
|-----------|-----------|---------|---------|---------|---------|---------|-----------|---------|---------|---------|---------|---------|----------|
| IGLL1     | 0.00079   | 0.88950 | 0.02398 | 0.80464 | 0.00021 | 0.95530 | 0.01911   | 0.72622 | N.C.    | N.C.    | N.C.    | N.C.    | CUTA     |
| RGS16     | 0.00003   | 0.95629 | 0.03497 | 0.75902 | 0.00021 | 0.95559 | 0.00087   | 0.88619 | 0.01686 | 0.83673 | N.C.    | N.C.    | DAD1     |
| SLC7A5    | < 0.00001 | 0.98327 | 0.02586 | 0.79455 | 0.00023 | 0.95229 | 0.00003   | 0.95554 | 0.01619 | 0.84751 | N.C.    | N.C.    | DAP      |
| TRIB1     | < 0.00001 | 0.98401 | 0.00923 | 0.89087 | 0.00011 | 0.97136 | 0.00055   | 0.89969 | 0.01401 | 0.86172 | N.C.    | N.C.    | DCPS     |
| DNAJC1    | < 0.00001 | 0.99306 | 0.01081 | 0.87955 | 0.00022 | 0.95421 | 0.00020   | 0.92430 | 0.03081 | 0.77229 | N.C.    | N.C.    | DDOST    |
| DCAF12    | < 0.00001 | 0.99719 | 0.03039 | 0.77375 | 0.00019 | 0.95900 | 0.00004   | 0.95238 | 0.02711 | 0.78852 | 0.03988 | 0.73615 | DENND1B  |
| C1GALT1C1 | < 0.00001 | 0.98696 | 0.01045 | 0.88272 | 0.00010 | 0.88223 | 0.00011   | 0.93599 | 0.03853 | 0.74638 | 0.02144 | 0.78615 | DENND5B  |
| SLC1A4    | < 0.00001 | 0.98680 | 0.01848 | 0.83024 | 0.00065 | 0.92729 | 0.00002   | 0.96154 | 0.02741 | 0.78688 | N.C.    | N.C.    | DERL1    |
| TP73      | 0.00063   | 0.89606 | 0.03620 | 0.75568 | 0.01978 | 0.79211 | 0.00003   | 0.95629 | 0.03630 | 0.75513 | N.C.    | N.C.    | DERL2    |
| ALDH1L2   | 0.00037   | 0.91038 | 0.01635 | 0.84294 | 0.00025 | 0.94961 | 0.00609   | 0.79929 | 0.02534 | 0.79748 | N.C.    | N.C.    | DERL3    |
| RPN2      | < 0.00001 | 0.99374 | 0.00953 | 0.88922 | 0.00018 | 0.96075 | 0.00019   | 0.92614 | 0.03801 | 0.74878 | N.C.    | N.C.    | DNAJB9   |
| DNAJB11   | < 0.00001 | 0.99534 | 0.01486 | 0.85435 | 0.00134 | 0.90782 | 0.00004   | 0.95492 | 0.02616 | 0.79311 | 0.02552 | 0.77320 | DNAJC1   |
| HM13      | < 0.00001 | 0.99593 | 0.00962 | 0.88767 | 0.00015 | 0.96459 | 0.00006   | 0.94621 | 0.02284 | 0.80916 | N.C.    | N.C.    | DNAJC3   |
| NT5DC2    | < 0.00001 | 0.99284 | 0.00810 | 0.90608 | 0.00025 | 0.94981 | 0.00024   | 0.92083 | 0.01879 | 0.82828 | N.C.    | N.C.    | DNASE2   |
| IL6R      | 0.00004   | 0.95372 | N.C.    | N.C.    | 0.00816 | 0.84165 | 0.00002   | 0.96289 | 0.04156 | 0.73713 | 0.01993 | 0.79121 | DYRK2    |
| CALU      | < 0.00001 | 0.99277 | 0.02173 | 0.81534 | 0.00022 | 0.95383 | 0.00003   | 0.95656 | N.C.    | N.C.    | N.C.    | FAF2    |          |
| TXN       | 0.00001   | 0.97164 | 0.04411 | 0.73094 | 0.00865 | 0.83889 | < 0.00001 | 0.97601 | 0.03620 | 0.75568 | 0.01548 | 0.80751 | EDEM2    |
| PRDM1     | < 0.00001 | 0.99126 | 0.02711 | 0.78865 | 0.00089 | 0.91905 | 0.00023   | 0.92160 | 0.02482 | 0.80054 | 0.03358 | 0.75139 | EDF1     |
| SEMA4A    | < 0.00001 | 0.99388 | 0.00798 | 0.91234 | 0.00023 | 0.95163 | 0.00005   | 0.94948 | 0.01686 | 0.83778 | N.C.    | N.C.    | EIF5A    |
| ERLEC1    | < 0.00001 | 0.98137 | 0.00856 | 0.89633 | 0.00008 | 0.98284 | 0.00069   | 0.89372 | 0.04364 | 0.73220 | N.C.    | N.C.    | ELL      |
| PYCR1     | < 0.00001 | 0.98358 | 0.00227 | 0.96662 | 0.00041 | 0.93783 | 0.00001   | 0.96981 | 0.01772 | 0.83265 | N.C.    | N.C.    | ELL2     |
| GMPPB     | < 0.00001 | 0.97593 | 0.01441 | 0.85744 | 0.00038 | 0.94003 | 0.00001   | 0.96642 | 0.02369 | 0.80575 | 0.03668 | 0.74410 | ERAP1    |
| NUCB2     | 0.00001   | 0.97217 | 0.01151 | 0.87353 | 0.00008 | 0.98084 | 0.00146   | 0.86848 | N.C.    | N.C.    | N.C.    | ERC1    |          |
| NOMO1     | < 0.00001 | 0.99269 | 0.00827 | 0.89970 | 0.00022 | 0.95461 | 0.00018   | 0.92710 | 0.02586 | 0.79450 | N.C.    | N.C.    | ERGC2    |
| C17orf28  | 0.00004   | 0.95349 | 0.00715 | 0.92410 | 0.00016 | 0.96302 | 0.00240   | 0.84734 | 0.02257 | 0.81046 | N.C.    | N.C.    | ERGC3    |
| IDH2      | < 0.00001 | 0.99540 | 0.00827 | 0.90062 | 0.00009 | 0.97278 | 0.00006   | 0.94704 | 0.02289 | 0.80871 | N.C.    | N.C.    | ERLEC1   |
| IFI27L1   | < 0.00001 | 0.99010 | 0.01323 | 0.86468 | 0.00036 | 0.94236 | 0.00007   | 0.94302 | 0.03123 | 0.77046 | N.C.    | N.C.    | ERO1L    |
| FAM46C    | < 0.00001 | 0.99629 | 0.00715 | 0.93742 | 0.00037 | 0.94136 | 0.00007   | 0.94495 | 0.01736 | 0.83423 | N.C.    | N.C.    | ERP44    |
| SPATS2    | < 0.00001 | 0.99093 | 0.00810 | 0.90296 | 0.00023 | 0.95165 | 0.00007   | 0.94333 | 0.02865 | 0.78094 | N.C.    | N.C.    | FAM129C  |
| MYO1D     | < 0.00001 | 0.99568 | 0.01624 | 0.84480 | 0.00174 | 0.90057 | 0.00012   | 0.93501 | 0.01619 | 0.84784 | 0.03357 | 0.75148 | FAM46C   |
| SEC24D    | < 0.00001 | 0.99432 | 0.01478 | 0.85497 | 0.00039 | 0.93925 | 0.00022   | 0.92253 | 0.02489 | 0.79995 | N.C.    | N.C.    | FAM69A   |
| ATXN1     | 0.00001   | 0.97435 | 0.00856 | 0.89607 | 0.00038 | 0.94016 | 0.00044   | 0.90564 | 0.02602 | 0.79374 | N.C.    | N.C.    | FBXO18   |
| PHGDH     | 0.00024   | 0.92059 | 0.04482 | 0.72884 | 0.00020 | 0.95755 | 0.00001   | 0.96978 | N.C.    | N.C.    | N.C.    | N.C.    | FCER2    |
| MGLL      | 0.00001   | 0.97020 | 0.02140 | 0.81726 | 0.01704 | 0.80095 | 0.00006   | 0.94617 | 0.03399 | 0.76259 | N.C.    | N.C.    | FCLR2    |
| LRRRC59   | < 0.00001 | 0.98329 | 0.02951 | 0.77681 | 0.00083 | 0.92158 | 0.00001   | 0.97164 | 0.03880 | 0.74587 | 0.03077 | 0.75852 | FCLR2    |
| NANS      | < 0.00001 | 0.97853 | 0.03904 | 0.74403 | 0.00109 | 0.91337 | < 0.00001 | 0.97578 | 0.04733 | 0.72268 | N.C.    | N.C.    | FKBP11   |
| CLPTM1L   | < 0.00001 | 0.98763 | 0.01741 | 0.83384 | 0.00074 | 0.92455 | 0.00003   | 0.95919 | 0.02742 | 0.78678 | 0.04046 | 0.73471 | FKBP2    |
| IGJ       | 0.00043   | 0.90614 | 0.00292 | 0.95209 | 0.00018 | 0.96000 | 0.00984   | 0.77142 | 0.03227 | 0.76813 | N.C.    | N.C.    | FMNL3    |
| SLC35B1   | < 0.00001 | 0.98740 | 0.02449 | 0.80208 | 0.00067 | 0.92690 | 0.00004   | 0.95267 | 0.03790 | 0.74902 | 0.02856 | 0.76437 | FND3B    |
| MCC       | < 0.00001 | 0.97622 | 0.01686 | 0.83849 | 0.00014 | 0.96789 | 0.00055   | 0.89979 | N.C.    | N.C.    | N.C.    | N.C.    | FOXP1    |
| ARNTL2    | 0.00010   | 0.93739 | 0.03620 | 0.75540 | N.C.    | N.C.    | 0.00039   | 0.90898 | N.C.    | N.C.    | N.C.    | N.C.    | FTSJ1    |
| CNKSR1    | < 0.00001 | 0.97969 | 0.00686 | 0.94032 | 0.00020 | 0.95709 | 0.00101   | 0.88128 | 0.01591 | 0.84972 | N.C.    | N.C.    | FUCA2    |
| MANEA     | < 0.00001 | 0.99229 | 0.01122 | 0.87617 | 0.00024 | 0.95046 | 0.00033   | 0.91344 | 0.02994 | 0.77499 | N.C.    | N.C.    | GABBR1   |
| QPCTL     | < 0.00001 | 0.98259 | 0.01589 | 0.85014 | 0.00063 | 0.92825 | 0.00006   | 0.94544 | 0.04192 | 0.73614 | N.C.    | N.C.    | GALNT2   |
| PLOD1     | < 0.00001 | 0.98404 | N.C.    | N.C.    | 0.00041 | 0.93785 | 0.00005   | 0.94914 | N.C.    | N.C.    | N.C.    | N.C.    | GANAB    |
| JSRP1     | 0.00002   | 0.96120 | 0.00880 | 0.89396 | 0.00023 | 0.95123 | 0.00139   | 0.87014 | 0.03235 | 0.76773 | N.C.    | N.C.    | GAPT     |
| HSPA13    | < 0.00001 | 0.99780 | 0.00923 | 0.89084 | 0.00008 | 0.97704 | 0.00011   | 0.93628 | 0.02894 | 0.77998 | N.C.    | N.C.    | GAS6     |
| RPN1      | < 0.00001 | 0.99228 | 0.01090 | 0.87821 | 0.00037 | 0.94129 | 0.00006   | 0.94822 | 0.02720 | 0.78775 | 0.04305 | 0.72949 | GFPT1    |
| CD320     | 0.00131   | 0.87245 | 0.01659 | 0.84125 | 0.01225 | 0.82048 | 0.00010   | 0.93801 | 0.02920 | 0.77846 | 0.04539 | 0.72460 | GGA2     |
| LIME1     | 0.00001   | 0.96938 | 0.01619 | 0.84633 | 0.00079 | 0.92298 | 0.00002   | 0.96303 | 0.02140 | 0.81727 | 0.04557 | 0.72418 | GGH      |
| SELS      | < 0.00001 | 0.99078 | 0.01706 | 0.83529 | 0.00011 | 0.97105 | 0.00005   | 0.95090 | 0.02711 | 0.78864 | N.C.    | N.C.    | GLCC1    |
| CALR      | 0.00001   | 0.97188 | 0.01645 | 0.84186 | 0.00106 | 0.91421 | 0.00002   | 0.96495 | 0.02618 | 0.79291 | 0.02489 | 0.77527 | GLG1     |
| FAM116B   | 0.00008   | 0.94179 | N.C.    | N.C.    | 0.00925 | 0.83548 | 0.00003   | 0.95587 | N.C.    | N.C.    | N.C.    | N.C.    | GLRX     |
| BAK1      | 0.00034   | 0.91240 | 0.04715 | 0.72308 | 0.01812 | 0.79748 | 0.00042   | 0.90682 | 0.01848 | 0.82997 | N.C.    | N.C.    | GMPPA    |
| C11orf10  | 0.00001   | 0.97491 | 0.02440 | 0.80294 | 0.00084 | 0.92131 | < 0.00001 | 0.97711 | 0.02455 | 0.80186 | 0.02552 | 0.77333 | GMPPB    |
| GLCC1     | < 0.00001 | 0.99824 | 0.00719 | 0.91747 | 0.00058 | 0.93014 | 0.00008   | 0.94213 | 0.02822 | 0.78272 | N.C.    | N.C.    | GNAS     |
| RCBTB2    | < 0.00001 | 0.98176 | 0.02022 | 0.82207 | 0.00130 | 0.90882 | 0.00042   | 0.90710 | N.C.    | N.C.    | N.C.    | N.C.    | GORASP2  |
| CD27      | < 0.00001 | 0.97614 | 0.00227 | 0.95779 | 0.00036 | 0.94266 | 0.00101   | 0.88128 | 0.01686 | 0.83655 | N.C.    | N.C.    | GPA11    |
| TST       | < 0.00001 | 0.99139 | N.C.    | N.C.    | 0.00499 | 0.86435 | 0.00018   | 0.92676 | 0.03887 | 0.74496 | 0.02774 | 0.76699 | GPRI72A  |
| C13orf15  | 0.00001   | 0.96637 | 0.00866 | 0.89469 | 0.00040 | 0.93863 | 0.00010   | 0.93713 | 0.01045 | 0.88238 | N.C.    | N.C.    | GSTP1    |
| KDEL2     | < 0.00001 | 0.98599 | 0.01686 | 0.83867 | 0.00017 | 0.96157 | 0.00002   | 0.96293 | 0.03951 | 0.74300 | 0.04840 | 0.71898 | GUSB     |
| DDOST     | < 0.00001 | 0.99714 | 0.00810 | 0.90693 | 0.00016 | 0.96318 | 0.00008   | 0.94214 | 0.02440 | 0.80257 | N.C.    | N.C.    | HDLBP    |
| GAPDH     | 0.00026   | 0.91886 | 0.04782 | 0.72147 | 0.01386 | 0.81380 | 0.00002   | 0.96452 | 0.04042 | 0.73978 | 0.01591 | 0.80554 | HERPUD1  |
| DNAJC3    | < 0.00001 | 0.99646 | 0.01186 | 0.86996 | 0.00016 | 0.96296 | 0.00008   | 0.94090 | 0.02879 | 0.78059 | 0.04944 | 0.71729 | HEXB     |
| APOL1     | 0.00003   | 0.95564 | 0.01441 | 0.85945 | 0.00035 | 0.94299 | 0.00072   | 0.89216 | 0.03790 | 0.74909 | 0.02053 | 0.78907 | HHEX     |
| SEC61G    | < 0.00001 | 0.99519 | N.C.    | N.C.    | 0.00052 | 0.93260 | 0.00003   | 0.95606 | N.C.    | N.C.    | 0.02596 | 0.77166 | HLA-DMB  |
| SEC61A1   | < 0.00001 | 0.99457 | 0.01619 | 0.84673 | 0.00046 | 0.93495 | 0.00005   | 0.95042 | 0.02894 | 0.77977 | 0.03830 | 0.74002 | HLA-DOA  |
| HDLBP     | < 0.00001 | 0.99531 | 0.00798 | 0.91196 | 0.00023 | 0.95341 | 0.00015   | 0.92957 | 0.02177 | 0.81482 | N.C.    | N.C.    | HLA-DPB1 |
| DCPS      | < 0.00001 | 0.98760 | 0.01441 | 0.85757 | 0.00224 | 0.89354 | 0.00009   | 0.93987 | 0.02199 | 0.81330 | 0.04276 | 0.73009 | HLA-DRA  |
| C1orf85   | 0.00001   | 0.97220 | 0.01476 | 0.85553 | 0.00040 | 0.93876 | 0.00039   | 0.90881 | 0.02594 | 0.79414 | N.C.    | N.C.    | HM13     |
| KCNK6     | < 0.00001 | 0.98364 | 0.00798 | 0.91143 | 0.00026 | 0.94835 | 0.00072   | 0.89236 | 0.01602 | 0.84872 | N.C.    | N.C.    | HNRPDL   |
| UAP1      | < 0.00001 | 0.98093 | 0.00715 | 0.93033 | 0.00093 | 0.91743 | 0.00104   | 0.88058 | 0.04637 | 0.72462 | N.C.    | N.C.    | HSP90B1  |
| SSR3      | < 0.00001 | 0.99673 | 0.01772 | 0.83280 | 0.00020 | 0.95717 | 0.00009   | 0.93900 | 0.03812 | 0.74807 | 0.02499 | 0.77490 | HSPA13   |
| MAGED1    | < 0.00001 | 0.97869 | 0.00810 | 0.90362 | 0.00059 | 0.92962 | 0.00004   | 0.95425 | 0.02275 | 0.80945 | N.C.    | N.C.    | HVCN1    |
| SLC31A1   | 0.00005   | 0.95100 | 0.02824 | 0.78252 | 0.00036 | 0.94201 | 0.00003   | 0.95647 | 0.04990 | 0.71720 | 0.02149 | 0.78596 | IDE      |
| STT3B     | < 0.00001 | 0.99530 | 0.01441 | 0.85927 | 0.00032 | 0.94474 | 0.00011   | 0.93551 | 0.02894 | 0.77960 | 0.02679 | 0.76943 | IDH2     |
| TMEM208   | < 0.00001 | 0.98087 | 0.03081 | 0.77247 | 0.00045 | 0.93613 | 0.00021   | 0.92400 | N.C.    | N.C.    | N.C.    | N.C.    | IFI27L1  |
| DENND1B   | < 0.00001 | 0.98549 | 0.00715 | 0.92417 | 0.00038 | 0.94100 | 0.00005   | 0.95000 | 0.04208 | 0.73572 | 0.02270 | 0.78204 | IFI35    |
| CDR2      | < 0.00001 | 0.98544 | 0.02894 | 0.77965 | 0.00450 | 0.86831 | 0.00003   | 0.95728 | N.C.    | N.C.    | N.C.    | N.C.    | IFNAR1   |
| LMAN2     | < 0.00001 | 0.98945 | 0.01032 |         |         |         |           |         |         |         |         |         |          |

|           |           |         |         |         |         |         |           |         |         |         |         |         |          |
|-----------|-----------|---------|---------|---------|---------|---------|-----------|---------|---------|---------|---------|---------|----------|
| ISOC2     | 0.00045   | 0.90536 | 0.01686 | 0.83981 | 0.00193 | 0.89770 | 0.00002   | 0.96366 | 0.04338 | 0.73284 | 0.00698 | 0.84971 | IRF8     |
| KCNN3     | 0.00007   | 0.94482 | 0.01130 | 0.87533 | 0.00082 | 0.92211 | 0.00303   | 0.83584 | 0.02969 | 0.77597 | N.C.    | N.C.    | ISG20    |
| OSTC      | < 0.00001 | 0.99325 | 0.01686 | 0.83788 | 0.00082 | 0.92215 | 0.00005   | 0.94893 | 0.02523 | 0.79845 | 0.02072 | 0.78846 | ITM2C    |
| B4GALT1   | 0.00002   | 0.96086 | 0.01478 | 0.85506 | 0.00037 | 0.94143 | 0.00002   | 0.96008 | 0.03104 | 0.77122 | 0.03127 | 0.75708 | ITPR1    |
| LAX1      | < 0.00001 | 0.98350 | 0.00227 | 0.95956 | 0.00130 | 0.90884 | 0.00066   | 0.89485 | 0.02573 | 0.79555 | N.C.    | N.C.    | JUP      |
| MET       | 0.00047   | 0.90369 | 0.00810 | 0.90700 | 0.02047 | 0.78941 | 0.00065   | 0.89514 | 0.03966 | 0.74244 | 0.04160 | 0.73239 | KCNN3    |
| CASP3     | < 0.00001 | 0.97521 | 0.04081 | 0.73896 | 0.00126 | 0.90968 | 0.00001   | 0.97458 | 0.03777 | 0.74940 | 0.04008 | 0.73561 | KDEL1    |
| SGK1      | 0.00005   | 0.94987 | 0.02482 | 0.80057 | 0.00072 | 0.92545 | 0.00201   | 0.85518 | 0.02994 | 0.77515 | N.C.    | N.C.    | KDEL2    |
| SRM       | 0.00007   | 0.94450 | 0.02025 | 0.82162 | 0.00039 | 0.93945 | 0.00001   | 0.97408 | 0.01880 | 0.82766 | N.C.    | N.C.    | KIAA0114 |
| ZBP1      | < 0.00001 | 0.97868 | 0.01503 | 0.85372 | 0.00022 | 0.95383 | 0.00025   | 0.91939 | N.C.    | N.C.    | N.C.    | N.C.    | KIAA0430 |
| SEC13     | < 0.00001 | 0.98524 | 0.01686 | 0.83726 | 0.00164 | 0.90246 | 0.00001   | 0.96665 | 0.03669 | 0.75247 | 0.04250 | 0.73063 | KIAA1033 |
| C15orf24  | < 0.00001 | 0.98340 | 0.03351 | 0.76414 | 0.02824 | 0.76553 | 0.00002   | 0.96369 | N.C.    | N.C.    | 0.04810 | 0.71948 | KIAA1147 |
| ERGIC2    | < 0.00001 | 0.98483 | 0.01632 | 0.84353 | 0.00018 | 0.95949 | 0.00034   | 0.91241 | N.C.    | N.C.    | N.C.    | N.C.    | KIF13B   |
| MYL6B     | < 0.00001 | 0.97666 | N.C.    | N.C.    | 0.01686 | 0.80181 | 0.00011   | 0.93561 | N.C.    | N.C.    | 0.03078 | 0.75840 | KMO      |
| UBE2J1    | < 0.00001 | 0.99512 | 0.01122 | 0.87611 | 0.00009 | 0.97274 | 0.00017   | 0.92774 | 0.03265 | 0.76688 | 0.04269 | 0.73027 | KRTCAP2  |
| NEU1      | < 0.00001 | 0.99337 | 0.02161 | 0.81613 | 0.00019 | 0.95851 | 0.00010   | 0.93802 | 0.04584 | 0.72578 | N.C.    | N.C.    | L3MBTL3  |
| RABAC1    | < 0.00001 | 0.97938 | 0.01285 | 0.86680 | 0.00030 | 0.94591 | 0.00005   | 0.94827 | 0.00923 | 0.89168 | N.C.    | N.C.    | LAX1     |
| CD59      | < 0.00001 | 0.98957 | 0.01045 | 0.88216 | 0.02846 | 0.76481 | 0.00013   | 0.93237 | 0.02022 | 0.82203 | 0.01532 | 0.80819 | LDLRAP1  |
| PIM2      | < 0.00001 | 0.98089 | 0.00810 | 0.90682 | 0.00041 | 0.93755 | 0.00020   | 0.92440 | 0.01619 | 0.84507 | 0.01689 | 0.80158 | LMAN1    |
| WFS1      | < 0.00001 | 0.97631 | 0.00227 | 0.95698 | 0.00025 | 0.94865 | 0.00036   | 0.91073 | 0.01703 | 0.83563 | N.C.    | N.C.    | LMAN2    |
| SPCS3     | < 0.00001 | 0.99507 | 0.01441 | 0.85859 | 0.00028 | 0.94689 | 0.00014   | 0.93155 | 0.03497 | 0.75897 | 0.03210 | 0.75481 | LRPAP1   |
| GAS6      | 0.00003   | 0.95592 | 0.04402 | 0.73120 | 0.02303 | 0.78092 | 0.00017   | 0.92809 | N.C.    | N.C.    | 0.02557 | 0.77273 | LRRCS9   |
| ALG1      | 0.00015   | 0.93036 | 0.03887 | 0.74519 | 0.00950 | 0.83397 | 0.00003   | 0.95535 | 0.03842 | 0.74663 | N.C.    | N.C.    | LRRK2    |
| UGGT2     | 0.00002   | 0.96293 | N.C.    | N.C.    | 0.00015 | 0.96583 | 0.00256   | 0.84433 | N.C.    | N.C.    | 0.04102 | 0.73367 | LY86     |
| MAN2A1    | < 0.00001 | 0.99030 | 0.01151 | 0.87324 | 0.00084 | 0.92121 | 0.00018   | 0.92660 | 0.03007 | 0.77458 | 0.02824 | 0.76546 | MAGED1   |
| FUCA2     | 0.00001   | 0.97439 | N.C.    | N.C.    | 0.00055 | 0.93133 | 0.00012   | 0.93447 | N.C.    | N.C.    | 0.04142 | 0.73283 | MAGEH1   |
| SLC39A7   | < 0.00001 | 0.99069 | 0.03668 | 0.75283 | 0.00073 | 0.92472 | 0.00002   | 0.96478 | N.C.    | N.C.    | N.C.    | N.C.    | MAGT1    |
| SUB1      | < 0.00001 | 0.99419 | 0.02324 | 0.80749 | 0.00073 | 0.92480 | 0.00004   | 0.95516 | 0.04444 | 0.72948 | 0.01987 | 0.79166 | MAN1A1   |
| FICD      | 0.00019   | 0.92607 | N.C.    | N.C.    | 0.00095 | 0.91664 | 0.00532   | 0.80677 | N.C.    | N.C.    | N.C.    | N.C.    | MAN2A1   |
| ST6GALNAC | < 0.00001 | 0.98942 | 0.01325 | 0.86427 | 0.00017 | 0.96166 | 0.00005   | 0.94951 | 0.01619 | 0.84530 | N.C.    | N.C.    | MANEA    |
| ARF4      | < 0.00001 | 0.99103 | 0.02699 | 0.78985 | 0.00008 | 0.97447 | 0.00006   | 0.94820 | 0.04575 | 0.72651 | 0.03583 | 0.74583 | MANF     |
| PREB      | < 0.00001 | 0.98255 | 0.00810 | 0.90577 | 0.00092 | 0.91770 | 0.00010   | 0.93867 | 0.01482 | 0.85469 | N.C.    | N.C.    | MAP2K6   |
| ERN1      | 0.00001   | 0.97461 | N.C.    | N.C.    | 0.00018 | 0.96047 | 0.00001   | 0.97165 | N.C.    | N.C.    | N.C.    | N.C.    | MBNL2    |
| ALG14     | < 0.00001 | 0.98487 | N.C.    | N.C.    | 0.00314 | 0.88161 | 0.00020   | 0.92433 | 0.03292 | 0.76541 | N.C.    | N.C.    | MCEE     |
| SIX5      | 0.00058   | 0.88850 | N.C.    | N.C.    | 0.00182 | 0.89936 | 0.00258   | 0.84398 | N.C.    | N.C.    | N.C.    | N.C.    | MEI1     |
| TPST2     | < 0.00001 | 0.99403 | N.C.    | N.C.    | 0.00011 | 0.97052 | 0.00005   | 0.94954 | N.C.    | N.C.    | N.C.    | N.C.    | METTL7A  |
| TMED3     | 0.00024   | 0.92042 | 0.03440 | 0.76114 | 0.00052 | 0.93287 | 0.00006   | 0.94712 | 0.04234 | 0.73518 | 0.02544 | 0.77372 | MGAT1    |
| GFPT1     | < 0.00001 | 0.99269 | 0.02134 | 0.81785 | 0.00020 | 0.95702 | 0.00007   | 0.94328 | 0.02161 | 0.81591 | 0.04249 | 0.73079 | MGAT2    |
| ESR1      | 0.00007   | 0.94463 | 0.01562 | 0.85094 | N.C.    | N.C.    | 0.00030   | 0.91522 | 0.01441 | 0.85876 | N.C.    | N.C.    | MLEC     |
| KDEL1R1   | < 0.00001 | 0.99708 | 0.02291 | 0.80848 | 0.00008 | 0.97655 | 0.00005   | 0.94948 | 0.02594 | 0.79422 | N.C.    | N.C.    | MS4A1    |
| MGAT2     | < 0.00001 | 0.98451 | 0.01285 | 0.86663 | 0.00041 | 0.93796 | 0.00027   | 0.91751 | 0.02324 | 0.80705 | N.C.    | N.C.    | MTDH     |
| C17orf91  | 0.00206   | 0.85388 | 0.04431 | 0.73019 | 0.00342 | 0.87843 | 0.02448   | 0.70595 | N.C.    | N.C.    | N.C.    | N.C.    | MTHFD2   |
| ACAT1     | 0.00017   | 0.92748 | 0.01686 | 0.83664 | 0.01927 | 0.79355 | 0.00007   | 0.94301 | N.C.    | N.C.    | 0.03446 | 0.74906 | MZB1     |
| MLEC      | < 0.00001 | 0.99078 | 0.01478 | 0.85522 | 0.00046 | 0.93475 | 0.00007   | 0.94408 | 0.01879 | 0.82841 | 0.04133 | 0.73305 | NANS     |
| LRPAP1    | < 0.00001 | 0.99065 | 0.00866 | 0.89463 | 0.00018 | 0.95980 | 0.00002   | 0.96166 | 0.02534 | 0.79727 | N.C.    | N.C.    | NCOA3    |
| IKBIP     | 0.00007   | 0.94360 | 0.04192 | 0.73620 | 0.02854 | 0.76457 | 0.00006   | 0.94549 | N.C.    | N.C.    | N.C.    | N.C.    | NDUFA1   |
| C6orf129  | 0.00002   | 0.96047 | 0.01696 | 0.83602 | 0.00023 | 0.95359 | 0.00011   | 0.93643 | 0.02374 | 0.80543 | N.C.    | N.C.    | NDUFA13  |
| SRPR      | < 0.00001 | 0.98955 | 0.00953 | 0.88848 | 0.00018 | 0.95944 | 0.00003   | 0.95944 | 0.02658 | 0.79119 | N.C.    | N.C.    | NDUFB8   |
| SLC25A23  | 0.00005   | 0.94968 | 0.03112 | 0.77091 | 0.00544 | 0.86091 | 0.00007   | 0.94390 | N.C.    | N.C.    | N.C.    | N.C.    | NDUFB5   |
| TMEM214   | < 0.00001 | 0.98270 | 0.03620 | 0.75543 | 0.00085 | 0.92048 | 0.00001   | 0.96824 | 0.03265 | 0.76661 | N.C.    | N.C.    | NET1     |
| CCNC      | < 0.00001 | 0.99243 | 0.01591 | 0.84976 | 0.00131 | 0.90844 | 0.00006   | 0.94702 | 0.03663 | 0.75350 | 0.02923 | 0.76285 | NEU1     |
| SURF4     | < 0.00001 | 0.98622 | 0.02949 | 0.77693 | 0.00058 | 0.93016 | 0.00001   | 0.97114 | 0.02711 | 0.78811 | 0.02949 | 0.76209 | NTSDC2   |
| SRPRB     | < 0.00001 | 0.99173 | 0.00986 | 0.88606 | 0.00033 | 0.94410 | 0.00009   | 0.94073 | 0.02896 | 0.77949 | N.C.    | N.C.    | NUCB2    |
| SPCS1     | < 0.00001 | 0.99659 | 0.00810 | 0.91011 | 0.00015 | 0.96678 | 0.00007   | 0.94482 | 0.03384 | 0.76315 | 0.03859 | 0.73931 | NUP160   |
| SEC14L1   | < 0.00001 | 0.99160 | 0.00856 | 0.89632 | 0.00095 | 0.91687 | 0.00009   | 0.94065 | 0.02489 | 0.79986 | 0.03686 | 0.74364 | NUP88    |
| TMED2     | < 0.00001 | 0.99304 | 0.01625 | 0.84446 | 0.00023 | 0.95118 | 0.00004   | 0.95309 | 0.03078 | 0.77271 | 0.01141 | 0.82473 | NUS1     |
| ENTPD7    | < 0.00001 | 0.98171 | 0.02193 | 0.81396 | 0.03988 | 0.73634 | 0.00013   | 0.93251 | 0.04307 | 0.73351 | 0.01853 | 0.79591 | OFD1     |
| NDUFA1    | < 0.00001 | 0.98158 | 0.04516 | 0.72768 | 0.01155 | 0.82402 | 0.00007   | 0.94329 | N.C.    | N.C.    | 0.02272 | 0.78192 | OS9      |
| PRDX2     | < 0.00001 | 0.97665 | 0.00859 | 0.89569 | 0.00516 | 0.86310 | 0.00004   | 0.95256 | 0.02849 | 0.78141 | N.C.    | N.C.    | OST4     |
| CANX      | < 0.00001 | 0.99256 | 0.02061 | 0.82044 | 0.00460 | 0.86712 | 0.00003   | 0.95630 | 0.03585 | 0.75684 | 0.00429 | 0.87010 | P4HB     |
| PLOD3     | 0.00002   | 0.96274 | N.C.    | N.C.    | 0.00099 | 0.91585 | 0.00001   | 0.97072 | N.C.    | N.C.    | N.C.    | N.C.    | PARP15   |
| FAM69A    | < 0.00001 | 0.98348 | 0.01686 | 0.83767 | 0.00208 | 0.89546 | 0.00014   | 0.93191 | N.C.    | N.C.    | N.C.    | N.C.    | PDE7A    |
| SLC39A14  | 0.00002   | 0.96377 | 0.01635 | 0.84279 | 0.00040 | 0.93877 | 0.00006   | 0.94679 | 0.03534 | 0.75806 | N.C.    | N.C.    | PDIA4    |
| MTDH      | < 0.00001 | 0.97706 | 0.01996 | 0.82319 | 0.00310 | 0.88206 | 0.00004   | 0.95440 | 0.03887 | 0.74468 | 0.00918 | 0.83600 | PDIA5    |
| ATP5G3    | 0.00008   | 0.94248 | 0.03265 | 0.76650 | 0.03141 | 0.75652 | 0.00008   | 0.94273 | 0.02573 | 0.79548 | 0.01816 | 0.79732 | PDIA6    |
| HEXB      | 0.00001   | 0.97237 | 0.01959 | 0.82454 | 0.00021 | 0.95554 | 0.00063   | 0.89585 | N.C.    | N.C.    | 0.02994 | 0.76057 | PK1      |
| SAR1B     | < 0.00001 | 0.97727 | 0.01619 | 0.84608 | 0.00527 | 0.86228 | 0.00014   | 0.93205 | 0.04911 | 0.71883 | 0.02304 | 0.78061 | PDXK     |
| COPB2     | < 0.00001 | 0.99551 | 0.01090 | 0.87895 | 0.00358 | 0.87666 | 0.00003   | 0.95702 | 0.02201 | 0.81315 | N.C.    | N.C.    | PGRMC2   |
| TMED10    | < 0.00001 | 0.99641 | 0.00810 | 0.90560 | 0.00023 | 0.95260 | 0.00008   | 0.94091 | 0.02264 | 0.81010 | 0.02365 | 0.77852 | PIGK     |
| TM9SF1    | < 0.00001 | 0.97845 | 0.02384 | 0.80513 | 0.00645 | 0.85337 | 0.00009   | 0.93998 | 0.03812 | 0.74782 | N.C.    | N.C.    | PIK3C2B  |
| TIMM17A   | 0.00001   | 0.97301 | N.C.    | N.C.    | 0.00530 | 0.86198 | < 0.00001 | 0.98288 | N.C.    | N.C.    | 0.03908 | 0.73823 | PIK3CD   |
| GIPR      | 0.00203   | 0.85474 | N.C.    | N.C.    | N.C.    | N.C.    | 0.01398   | 0.74852 | N.C.    | N.C.    | N.C.    | N.C.    | PINK1    |
| ADA       | < 0.00001 | 0.97922 | N.C.    | N.C.    | 0.00015 | 0.96600 | 0.00035   | 0.91156 | N.C.    | N.C.    | N.C.    | N.C.    | PLAGL1   |
| PSMB6     | 0.00003   | 0.95576 | 0.03505 | 0.75866 | 0.03763 | 0.74163 | < 0.00001 | 0.97590 | 0.02534 | 0.79734 | N.C.    | N.C.    | PLEKHA2  |
| MTHFD2    | < 0.00001 | 0.98316 | 0.03425 | 0.76156 | 0.00083 | 0.92177 | 0.00010   | 0.93841 | 0.02894 | 0.77983 | 0.03077 | 0.75855 | PLEKHF2  |
| KLHL14    | < 0.00001 | 0.97630 | 0.00719 | 0.91678 | 0.00045 | 0.93604 | 0.00004   | 0.95319 | 0.04715 | 0.72308 | N.C.    | N.C.    | PP1B     |
| TRAM1     | < 0.00001 | 0.98987 | 0.01411 | 0.86129 | 0.00015 | 0.96613 | 0.00047   | 0.90401 | N.C.    | N.C.    | 0.02856 | 0.76433 | PRDM1    |
| GANAB     | < 0.00001 | 0.98709 | 0.02173 | 0.81530 | 0.00236 | 0.89158 | 0.00005   | 0.94871 | N.C.    | N.C.    | 0.02846 | 0.76486 | PRDM15   |
| SND1      | < 0.00001 | 0.98596 | 0.01390 | 0.86215 | 0.00100 | 0.91563 | 0.00003   | 0.95540 | 0.01686 | 0.83985 | N.C.    | N.C.    | PRDX4    |
| ALG2      | 0.00003   | 0.95896 | 0.02025 | 0.82139 | 0.00029 | 0       |           |         |         |         |         |         |          |

|           |           |         |         |         |         |         |           |         |         |         |         |         |             |
|-----------|-----------|---------|---------|---------|---------|---------|-----------|---------|---------|---------|---------|---------|-------------|
| SRP54     | < 0.00001 | 0.99059 | 0.01422 | 0.86078 | 0.00037 | 0.94123 | 0.00006   | 0.94645 | 0.02008 | 0.82283 | 0.02552 | 0.77324 | PSMD8       |
| MTFP1     | 0.00068   | 0.89408 | N.C.    | N.C.    | 0.02557 | 0.77293 | 0.00003   | 0.95617 | N.C.    | N.C.    | N.C.    | N.C.    | PSMD9       |
| TXNDC15   | 0.00001   | 0.96755 | 0.01441 | 0.85785 | 0.00021 | 0.95513 | 0.00024   | 0.92091 | 0.03542 | 0.75779 | N.C.    | N.C.    | PTGS1       |
| MAGT1     | < 0.00001 | 0.99164 | 0.01696 | 0.83593 | 0.00109 | 0.91332 | 0.00006   | 0.94547 | 0.03704 | 0.75145 | 0.01993 | 0.79128 | RABAC1      |
| GMPPA     | < 0.00001 | 0.98662 | 0.02523 | 0.79879 | 0.00038 | 0.94081 | 0.00006   | 0.94587 | 0.02586 | 0.79458 | N.C.    | N.C.    | RAP1GD51    |
| BSG       | 0.00001   | 0.97263 | 0.03994 | 0.74137 | 0.00183 | 0.89917 | 0.00003   | 0.95644 | 0.03653 | 0.75403 | N.C.    | N.C.    | RAPGEF2     |
| B3GNT9    | 0.00034   | 0.91275 | N.C.    | N.C.    | 0.00596 | 0.85680 | 0.00114   | 0.87742 | N.C.    | N.C.    | N.C.    | N.C.    | RASGRP2     |
| DAD1      | < 0.00001 | 0.98043 | 0.01643 | 0.84219 | 0.00269 | 0.88707 | 0.00003   | 0.95655 | 0.03753 | 0.75002 | 0.04310 | 0.72927 | RBM47       |
| VCP       | < 0.00001 | 0.98001 | 0.02022 | 0.82193 | 0.00120 | 0.91089 | 0.00003   | 0.95715 | 0.02489 | 0.79994 | 0.04765 | 0.72042 | RHDD3       |
| AARS      | < 0.00001 | 0.98525 | N.C.    | N.C.    | 0.00047 | 0.93428 | 0.00004   | 0.95252 | N.C.    | N.C.    | N.C.    | N.C.    | RIMKLB      |
| SPCS2     | < 0.00001 | 0.98963 | N.C.    | N.C.    | 0.00740 | 0.84655 | 0.00024   | 0.92014 | N.C.    | N.C.    | N.C.    | N.C.    | ROMO1       |
| SSR4      | 0.00001   | 0.96680 | 0.00715 | 0.92217 | 0.00024 | 0.95076 | 0.00133   | 0.87196 | 0.01446 | 0.85656 | N.C.    | N.C.    | RPN2        |
| LAP3      | < 0.00001 | 0.98255 | 0.03902 | 0.74414 | 0.00023 | 0.95281 | 0.00013   | 0.93368 | 0.04956 | 0.71798 | N.C.    | N.C.    | RPS27L      |
| MAPK6     | < 0.00001 | 0.98068 | 0.01122 | 0.87685 | 0.00276 | 0.88624 | 0.00001   | 0.96562 | 0.02457 | 0.80162 | 0.01570 | 0.80655 | RPS6KB2     |
| CHCHD2    | 0.00002   | 0.98425 | 0.02501 | 0.79953 | 0.00040 | 0.93847 | 0.00001   | 0.97200 | 0.03265 | 0.76632 | 0.00718 | 0.84808 | RRP1        |
| TNFRSF13B | 0.00012   | 0.93381 | 0.02933 | 0.77801 | 0.03801 | 0.74071 | 0.00256   | 0.84442 | 0.04029 | 0.74008 | N.C.    | N.C.    | SAR1B       |
| INPP4A    | 0.00001   | 0.97402 | 0.03887 | 0.74507 | 0.00024 | 0.95066 | 0.00153   | 0.86667 | N.C.    | N.C.    | N.C.    | N.C.    | SATB1       |
| B4GALT2   | 0.00036   | 0.91121 | 0.00810 | 0.90935 | 0.00723 | 0.84776 | 0.00514   | 0.80856 | 0.01186 | 0.87042 | N.C.    | N.C.    | SCAF4       |
| COMM4     | 0.00940   | 0.77420 | N.C.    | N.C.    | 0.01915 | 0.79399 | 0.00180   | 0.85998 | 0.02177 | 0.81507 | N.C.    | N.C.    | SCARB2      |
| COPG      | < 0.00001 | 0.98540 | 0.02374 | 0.80546 | 0.00023 | 0.95242 | 0.00001   | 0.97039 | 0.02797 | 0.78382 | N.C.    | N.C.    | SDF2L1      |
| ALG3      | 0.00005   | 0.95099 | 0.02573 | 0.79593 | N.C.    | N.C.    | 0.00003   | 0.95747 | N.C.    | N.C.    | N.C.    | N.C.    | SDF4        |
| ATP5A1    | < 0.00001 | 0.98559 | 0.01619 | 0.84568 | 0.00455 | 0.86765 | 0.00002   | 0.96209 | 0.02138 | 0.81765 | 0.02127 | 0.78677 | SEC11C      |
| YIF1A     | 0.00018   | 0.92658 | N.C.    | N.C.    | 0.00281 | 0.88556 | 0.00006   | 0.94674 | N.C.    | N.C.    | 0.02230 | 0.78311 | SEC13       |
| EIF4G1    | 0.00001   | 0.96798 | 0.02642 | 0.79209 | 0.00276 | 0.88617 | 0.00002   | 0.96332 | 0.02920 | 0.77834 | 0.03127 | 0.75694 | SEC14L1     |
| DERL1     | < 0.00001 | 0.99231 | 0.01619 | 0.84508 | 0.00008 | 0.97563 | 0.00006   | 0.94776 | 0.03497 | 0.75887 | 0.02902 | 0.76333 | SEC23B      |
| NDUFB6    | 0.00013   | 0.93265 | 0.03994 | 0.74132 | N.C.    | N.C.    | 0.00003   | 0.95940 | 0.03249 | 0.76740 | N.C.    | N.C.    | SEC24A      |
| SLC35A2   | 0.00093   | 0.88421 | 0.02162 | 0.81575 | 0.00724 | 0.84763 | 0.00093   | 0.88417 | N.C.    | N.C.    | N.C.    | N.C.    | SEC31A      |
| SEC23B    | < 0.00001 | 0.97671 | 0.03123 | 0.77046 | 0.00018 | 0.96041 | 0.00034   | 0.91222 | N.C.    | N.C.    | N.C.    | N.C.    | SEC61A1     |
| CNPY2     | 0.00006   | 0.94719 | 0.03161 | 0.76944 | 0.00969 | 0.83262 | 0.00003   | 0.95971 | 0.02642 | 0.79207 | 0.03477 | 0.74820 | SEC61B      |
| ARSB      | < 0.00001 | 0.98372 | 0.03497 | 0.75929 | 0.00700 | 0.84941 | 0.00020   | 0.92514 | 0.02813 | 0.78325 | 0.00656 | 0.85245 | SEL1L       |
| ROMO1     | 0.00010   | 0.93793 | 0.01959 | 0.82447 | 0.00943 | 0.83430 | 0.00033   | 0.91341 | 0.03036 | 0.77389 | 0.01377 | 0.81427 | SEL1L3      |
| DENN5B    | < 0.00001 | 0.98322 | 0.00715 | 0.92150 | 0.00021 | 0.95560 | 0.00051   | 0.90175 | N.C.    | N.C.    | N.C.    | N.C.    | SELK        |
| TOP1      | < 0.00001 | 0.97949 | 0.01686 | 0.83796 | 0.03446 | 0.74905 | 0.00002   | 0.96266 | 0.02609 | 0.79341 | 0.04333 | 0.72879 | SELL        |
| PDIA3     | < 0.00001 | 0.99091 | 0.03265 | 0.76698 | 0.00036 | 0.94194 | 0.00003   | 0.95531 | 0.03697 | 0.75173 | 0.02418 | 0.77704 | SELS        |
| MESDC2    | < 0.00001 | 0.98359 | 0.01444 | 0.85677 | 0.00231 | 0.89242 | 0.00004   | 0.95321 | 0.02103 | 0.81931 | 0.01591 | 0.80558 | SELT        |
| CASP10    | 0.00002   | 0.96265 | 0.00106 | 0.97609 | 0.00356 | 0.87687 | 0.00075   | 0.89111 | 0.01598 | 0.84928 | 0.04737 | 0.72102 | SEMA4A      |
| NUCB1     | 0.00001   | 0.97230 | 0.02774 | 0.78574 | 0.00023 | 0.95273 | 0.00004   | 0.95175 | 0.03994 | 0.74124 | N.C.    | N.C.    | SERP1       |
| COX8A     | 0.00363   | 0.82653 | N.C.    | N.C.    | 0.01987 | 0.79171 | 0.00051   | 0.90185 | 0.04116 | 0.73805 | 0.03561 | 0.74637 | SESTD1      |
| MAGEH1    | 0.00018   | 0.92713 | 0.02718 | 0.78787 | 0.00236 | 0.89143 | 0.00001   | 0.97195 | N.C.    | N.C.    | 0.00708 | 0.84884 | SF3B5       |
| ZDHHC12   | 0.00308   | 0.83484 | 0.02328 | 0.80688 | 0.00951 | 0.83384 | 0.00044   | 0.90597 | 0.02905 | 0.77914 | N.C.    | N.C.    | SGK1        |
| COMM1     | 0.00093   | 0.88426 | N.C.    | N.C.    | 0.01386 | 0.81380 | 0.00005   | 0.94922 | N.C.    | N.C.    | 0.00909 | 0.83646 | SLAMF7      |
| NDUFB7    | 0.00042   | 0.90703 | N.C.    | N.C.    | 0.01476 | 0.81046 | 0.00002   | 0.96515 | N.C.    | N.C.    | N.C.    | N.C.    | SLC14A      |
| PSMA5     | 0.00005   | 0.95129 | 0.01186 | 0.87009 | 0.01279 | 0.81820 | 0.00001   | 0.97169 | 0.01632 | 0.84330 | 0.00158 | 0.90342 | SLC31A1     |
| GOT1      | 0.00205   | 0.85419 | N.C.    | N.C.    | 0.02327 | 0.77958 | 0.00020   | 0.92472 | N.C.    | N.C.    | N.C.    | N.C.    | SLC33A1     |
| ATP2A2    | < 0.00001 | 0.98496 | 0.02124 | 0.81817 | 0.00250 | 0.88928 | 0.00004   | 0.95266 | 0.02534 | 0.79734 | 0.02312 | 0.78015 | SLC35B1     |
| SLC39A9   | < 0.00001 | 0.99479 | 0.04364 | 0.73228 | 0.00023 | 0.95181 | 0.00013   | 0.93260 | N.C.    | N.C.    | N.C.    | N.C.    | SLC38A10    |
| GLRX      | < 0.00001 | 0.97864 | 0.02061 | 0.82041 | 0.00023 | 0.95146 | 0.00047   | 0.90372 | 0.03384 | 0.76306 | N.C.    | N.C.    | SLC44A1     |
| GORASP2   | < 0.00001 | 0.98734 | 0.01536 | 0.85197 | 0.00025 | 0.94869 | 0.00001   | 0.96626 | 0.02786 | 0.78457 | N.C.    | N.C.    | SLC7A1      |
| UBA5      | < 0.00001 | 0.97932 | 0.02090 | 0.81968 | 0.00093 | 0.91727 | 0.00007   | 0.94417 | N.C.    | N.C.    | N.C.    | N.C.    | SMAD3       |
| PHPT1     | 0.00014   | 0.93208 | N.C.    | N.C.    | 0.01201 | 0.82180 | 0.00049   | 0.90314 | N.C.    | N.C.    | N.C.    | N.C.    | SMC6        |
| KIAA0114  | < 0.00001 | 0.97832 | 0.01441 | 0.85763 | 0.00209 | 0.89522 | 0.00002   | 0.96291 | 0.02440 | 0.80256 | 0.00770 | 0.84463 | SND1        |
| TMED1     | 0.00240   | 0.84732 | N.C.    | N.C.    | 0.00146 | 0.90552 | 0.00305   | 0.83555 | 0.04829 | 0.72057 | N.C.    | N.C.    | SNX22       |
| SELK      | 0.00003   | 0.95906 | 0.00962 | 0.88706 | 0.00020 | 0.95689 | 0.00044   | 0.90549 | 0.02826 | 0.78238 | N.C.    | N.C.    | SP110       |
| SCARB2    | < 0.00001 | 0.97527 | 0.01032 | 0.88431 | 0.00008 | 0.97825 | 0.00115   | 0.87704 | N.C.    | N.C.    | N.C.    | N.C.    | SPATS2      |
| ITGB7     | 0.00004   | 0.95490 | 0.02774 | 0.78582 | 0.00151 | 0.90454 | 0.00098   | 0.88254 | 0.03887 | 0.74523 | N.C.    | N.C.    | SPCS1       |
| PIGT      | < 0.00001 | 0.99291 | N.C.    | N.C.    | 0.00015 | 0.96575 | 0.00004   | 0.95202 | N.C.    | N.C.    | 0.03988 | 0.73620 | SPCS3       |
| USO1      | < 0.00001 | 0.98646 | 0.01519 | 0.85269 | 0.00053 | 0.93221 | 0.00041   | 0.90740 | N.C.    | N.C.    | N.C.    | N.C.    | SRM         |
| TM9SF2    | < 0.00001 | 0.99227 | 0.01441 | 0.85818 | 0.00029 | 0.94650 | 0.00012   | 0.93412 | 0.04235 | 0.73501 | N.C.    | N.C.    | SRP54       |
| RAPGEF2   | 0.00009   | 0.94044 | N.C.    | N.C.    | 0.00172 | 0.90119 | 0.00242   | 0.84688 | N.C.    | N.C.    | N.C.    | N.C.    | SRP68       |
| NDUFS5    | 0.00006   | 0.94730 | N.C.    | N.C.    | 0.02301 | 0.78105 | 0.00007   | 0.94382 | N.C.    | N.C.    | 0.00549 | 0.86053 | SRPR        |
| EDEM1     | < 0.00001 | 0.99056 | 0.00715 | 0.92378 | 0.00008 | 0.97545 | 0.00020   | 0.92482 | 0.03668 | 0.75288 | N.C.    | N.C.    | SRPRB       |
| BRP44L    | 0.00003   | 0.95738 | 0.01045 | 0.88129 | 0.00079 | 0.92303 | 0.00001   | 0.96737 | 0.02140 | 0.81730 | N.C.    | N.C.    | SSR2        |
| MRPL51    | < 0.00001 | 0.98747 | N.C.    | N.C.    | 0.01149 | 0.82439 | 0.00008   | 0.94128 | N.C.    | N.C.    | N.C.    | N.C.    | SSR3        |
| PDXK      | 0.00025   | 0.91964 | 0.03742 | 0.75035 | 0.00015 | 0.96523 | 0.00002   | 0.96175 | N.C.    | N.C.    | N.C.    | N.C.    | SSR4        |
| SSR2      | < 0.00001 | 0.98827 | 0.01645 | 0.84199 | 0.00020 | 0.95660 | 0.00005   | 0.94986 | 0.02609 | 0.79337 | N.C.    | N.C.    | ST6GALLNAC4 |
| GARS      | 0.00001   | 0.97030 | 0.02969 | 0.77603 | 0.00024 | 0.95037 | < 0.00001 | 0.97729 | 0.03384 | 0.76304 | 0.04610 | 0.72311 | STK17A      |
| COX6B1    | 0.00004   | 0.95304 | N.C.    | N.C.    | 0.01235 | 0.82005 | 0.00001   | 0.96905 | N.C.    | N.C.    | N.C.    | N.C.    | STT3A       |
| COX5A     | 0.00001   | 0.96699 | 0.03734 | 0.75057 | 0.00453 | 0.86794 | 0.00004   | 0.95412 | 0.03653 | 0.75385 | 0.01118 | 0.82581 | STT3B       |
| RAB1A     | < 0.00001 | 0.98968 | 0.02989 | 0.77543 | 0.00035 | 0.94316 | 0.00012   | 0.93515 | 0.02786 | 0.78462 | 0.04944 | 0.71720 | SUMF2       |
| SLC33A1   | 0.00003   | 0.95804 | 0.01147 | 0.87458 | 0.00102 | 0.91510 | 0.00125   | 0.87421 | 0.03727 | 0.75075 | N.C.    | N.C.    | SURF4       |
| CTSD      | < 0.00001 | 0.98816 | N.C.    | N.C.    | 0.00020 | 0.95663 | 0.00011   | 0.93601 | N.C.    | N.C.    | N.C.    | N.C.    | TAF12       |
| FBXO18    | < 0.00001 | 0.98222 | 0.01151 | 0.87339 | 0.00118 | 0.91129 | 0.00005   | 0.95130 | 0.03068 | 0.77305 | N.C.    | N.C.    | TET3        |
| GALNT2    | < 0.00001 | 0.99210 | 0.01225 | 0.86879 | 0.00019 | 0.95851 | 0.00027   | 0.91764 | 0.02247 | 0.81077 | N.C.    | N.C.    | TM9SF1      |
| GSTP1     | 0.00016   | 0.92908 | N.C.    | N.C.    | 0.01653 | 0.80294 | 0.00003   | 0.95657 | N.C.    | N.C.    | 0.03936 | 0.73763 | TM9SF2      |
| DERL3     | 0.00001   | 0.97104 | 0.01880 | 0.82786 | 0.00023 | 0.95123 | 0.00072   | 0.89223 | 0.04192 | 0.73612 | N.C.    | N.C.    | TM9SF3      |
| YIPF5     | < 0.00001 | 0.98358 | 0.03081 | 0.77209 | 0.00073 | 0.92506 | 0.00012   | 0.93472 | N.C.    | N.C.    | N.C.    | N.C.    | TMC8        |
| FOXRED1   | 0.00203   | 0.85452 | N.C.    | N.C.    | 0.02322 | 0.77985 | 0.00021   | 0.92389 | N.C.    | N.C.    | N.C.    | N.C.    | TMCO1       |
| UQCRH     | 0.00001   | 0.96775 | 0.04444 | 0.72974 | 0.03972 | 0.73683 | 0.00003   | 0.95916 | N.C.    | N.C.    | 0.02824 | 0.76561 | TMED10      |
| OST4      | 0.00001   | 0.96917 | 0.00827 | 0.89925 | 0.00561 | 0.85940 | 0.00015   | 0.92996 | 0.01045 | 0.88203 | N.C.    | N.C.    | TMED2       |
| BCKDK     | 0.00084   | 0.88780 | 0.01602 | 0.84887 | 0.00036 | 0.94257 | 0.00002   | 0.96523 | 0.01285 | 0.86632 | N.C.    | N.C.    | TMED3       |
| UGGT1     | < 0.00001 | 0.97610 | 0.02482 | 0.80051 | 0.00324 | 0.88054 | 0.00085   | 0.88724 | N.C.    | N.C.    | 0.04023 | 0.73522 | TMED5       |
| MEI1      | 0.00001   | 0.96728 | 0.      |         |         |         |           |         |         |         |         |         |             |

|           |           |         |         |         |         |         |           |         |         |         |         |         |           |
|-----------|-----------|---------|---------|---------|---------|---------|-----------|---------|---------|---------|---------|---------|-----------|
| SLC38A10  | < 0.00001 | 0.97563 | 0.01631 | 0.84406 | 0.00021 | 0.95508 | 0.00006   | 0.94712 | 0.02399 | 0.80453 | N.C.    | N.C.    | TMEM214   |
| COX7A2    | < 0.00001 | 0.98174 | 0.02863 | 0.78107 | 0.00846 | 0.84009 | 0.00002   | 0.96432 | N.C.    | N.C.    | 0.04435 | 0.72658 | TMEM39A   |
| UFD1L     | 0.00002   | 0.96296 | 0.01442 | 0.85717 | 0.03078 | 0.75835 | 0.00002   | 0.96395 | 0.02685 | 0.79059 | 0.03912 | 0.73809 | TMEM59    |
| ERP44     | < 0.00001 | 0.98523 | 0.02402 | 0.80426 | 0.00149 | 0.90484 | 0.00003   | 0.95852 | N.C.    | N.C.    | 0.03973 | 0.73674 | TMEM70    |
| MBNL2     | < 0.00001 | 0.98192 | 0.00948 | 0.88964 | 0.00027 | 0.94744 | 0.00098   | 0.88247 | N.C.    | N.C.    | N.C.    | N.C.    | TNFRSF10B |
| C14orf147 | 0.00014   | 0.93208 | 0.04351 | 0.73258 | 0.00085 | 0.92073 | 0.00009   | 0.93988 | N.C.    | N.C.    | 0.02961 | 0.76146 | TNFRSF17  |
| C15orf39  | 0.00001   | 0.96701 | N.C.    | N.C.    | 0.01185 | 0.82273 | 0.00088   | 0.88613 | 0.03887 | 0.74553 | N.C.    | N.C.    | TOP1      |
| CLTC      | < 0.00001 | 0.98915 | 0.02193 | 0.81387 | 0.00235 | 0.89181 | 0.00006   | 0.94782 | 0.04442 | 0.72995 | 0.02447 | 0.77626 | TPST2     |
| CNP       | < 0.00001 | 0.98271 | 0.03634 | 0.75491 | 0.00015 | 0.96492 | 0.00004   | 0.95465 | N.C.    | N.C.    | N.C.    | N.C.    | TRAM1     |
| ARFGAP3   | 0.00001   | 0.97293 | 0.02402 | 0.80432 | 0.00021 | 0.95608 | 0.00125   | 0.87429 | 0.04402 | 0.73115 | N.C.    | N.C.    | TRAM2     |
| WBSCR22   | 0.00013   | 0.93278 | 0.03497 | 0.75893 | 0.02083 | 0.78814 | 0.00004   | 0.95448 | 0.02822 | 0.78292 | N.C.    | N.C.    | TRIB1     |
| ATPIF1    | 0.00095   | 0.88342 | N.C.    | N.C.    | 0.02312 | 0.78018 | 0.00033   | 0.91342 | N.C.    | N.C.    | N.C.    | N.C.    | TRIO      |
| SLC1A5    | 0.00005   | 0.95097 | 0.03668 | 0.75275 | 0.00085 | 0.92038 | 0.00138   | 0.87077 | 0.01045 | 0.88186 | N.C.    | N.C.    | TSPAN33   |
| ATF6      | 0.00001   | 0.96700 | 0.02106 | 0.81873 | 0.02305 | 0.78049 | 0.00070   | 0.89311 | 0.03902 | 0.74421 | N.C.    | N.C.    | TTC39C    |
| CREB3     | 0.00001   | 0.96875 | 0.04856 | 0.71983 | 0.00108 | 0.91362 | 0.00009   | 0.93971 | N.C.    | N.C.    | N.C.    | N.C.    | TXN       |
| ALG9      | 0.00001   | 0.96738 | 0.03440 | 0.76122 | 0.00085 | 0.92034 | 0.00005   | 0.94929 | N.C.    | N.C.    | N.C.    | N.C.    | TXNDC11   |
| SELT      | < 0.00001 | 0.97907 | 0.01865 | 0.82923 | 0.00056 | 0.93091 | 0.00004   | 0.95229 | 0.03663 | 0.75331 | 0.01690 | 0.80140 | TXNDC15   |
| CPEB4     | 0.00010   | 0.93851 | 0.04234 | 0.73523 | 0.01014 | 0.83059 | 0.00402   | 0.82153 | N.C.    | N.C.    | N.C.    | N.C.    | TXNDC5    |
| SEL1L3    | 0.00006   | 0.94755 | 0.00810 | 0.90548 | 0.00008 | 0.97652 | 0.00382   | 0.82403 | N.C.    | N.C.    | N.C.    | N.C.    | UAP1      |
| MTX1      | 0.00070   | 0.89302 | 0.03723 | 0.75090 | 0.02815 | 0.76594 | 0.00104   | 0.88049 | 0.03403 | 0.76226 | N.C.    | N.C.    | UBA5      |
| TMEM147   | 0.00156   | 0.86589 | 0.02440 | 0.80319 | 0.00025 | 0.94958 | 0.00076   | 0.89066 | 0.02754 | 0.78645 | 0.02390 | 0.77774 | UBE211    |
| NDUFA13   | 0.00013   | 0.93325 | N.C.    | N.C.    | 0.00236 | 0.89144 | 0.00004   | 0.95379 | N.C.    | N.C.    | N.C.    | N.C.    | UFD1L     |
| GPA1      | 0.00015   | 0.93025 | 0.01686 | 0.83731 | 0.00710 | 0.84869 | 0.00001   | 0.96619 | 0.01848 | 0.83041 | 0.03768 | 0.74142 | UGGT1     |
| UGDH      | 0.00008   | 0.94221 | N.C.    | N.C.    | 0.02967 | 0.76127 | 0.00015   | 0.92975 | N.C.    | N.C.    | N.C.    | N.C.    | USO1      |
| NUS1      | < 0.00001 | 0.99075 | 0.02782 | 0.78534 | 0.00562 | 0.85929 | 0.00002   | 0.96545 | N.C.    | N.C.    | N.C.    | N.C.    | WBSCR22   |
| PRDX5     | 0.00005   | 0.94992 | 0.01519 | 0.85291 | 0.00090 | 0.91856 | 0.00041   | 0.90757 | 0.01591 | 0.84960 | N.C.    | N.C.    | WDFY4     |
| GSTZ1     | 0.00120   | 0.87578 | N.C.    | N.C.    | N.C.    | 0.00274 | 0.84087   | N.C.    | N.C.    | N.C.    | N.C.    | N.C.    | WFS1      |
| CREB3L2   | < 0.00001 | 0.98387 | 0.02199 | 0.81333 | 0.00035 | 0.94333 | 0.00013   | 0.93248 | 0.02841 | 0.78174 | N.C.    | N.C.    | WIP1      |
| SDF4      | 0.00002   | 0.96067 | 0.02268 | 0.80981 | 0.00102 | 0.91503 | 0.00007   | 0.94438 | 0.04584 | 0.72594 | N.C.    | N.C.    | XBP1      |
| YARS      | 0.00001   | 0.96761 | N.C.    | N.C.    | 0.02819 | 0.76578 | 0.00002   | 0.96380 | N.C.    | N.C.    | N.C.    | N.C.    | YIPF5     |
| ATP5G1    | 0.00084   | 0.88762 | N.C.    | N.C.    | 0.03461 | 0.74868 | 0.00005   | 0.95057 | N.C.    | N.C.    | 0.02447 | 0.77628 | ZBP1      |
| IFNAR2    | 0.00003   | 0.95770 | 0.02754 | 0.78636 | 0.01265 | 0.81889 | 0.00040   | 0.90834 | 0.04534 | 0.72719 | 0.01995 | 0.79104 | ZCCHC2    |
| OS9       | < 0.00001 | 0.98031 | 0.02505 | 0.79934 | 0.00046 | 0.93495 | 0.00039   | 0.90900 | N.C.    | N.C.    | N.C.    | N.C.    | ZFP36L1   |
| PSMA2     | 0.00003   | 0.95544 | 0.04427 | 0.73048 | 0.01488 | 0.80979 | < 0.00001 | 0.97588 | 0.04956 | 0.71802 | 0.00241 | 0.89062 | ZNF107    |
| EPRS      | < 0.00001 | 0.99015 | 0.01865 | 0.82909 | 0.00085 | 0.92088 | 0.00020   | 0.92434 | N.C.    | N.C.    | 0.03686 | 0.74343 | ZNF238    |
| MCEE      | 0.00044   | 0.90549 | N.C.    | N.C.    | 0.00442 | 0.86899 | 0.00499   | 0.81004 | N.C.    | N.C.    | N.C.    | N.C.    | ZNF318    |
| DERL2     | 0.00010   | 0.93756 | 0.03768 | 0.74961 | 0.00015 | 0.96439 | 0.00022   | 0.92227 | N.C.    | N.C.    | N.C.    | N.C.    | ZNF320    |
| MGAT1     | 0.00002   | 0.96316 | 0.01686 | 0.83772 | 0.00018 | 0.95943 | 0.00008   | 0.94154 | 0.02177 | 0.81465 | N.C.    | N.C.    | ZNF83     |
| RHBDD3    | 0.00087   | 0.88629 | 0.02913 | 0.77882 | 0.00337 | 0.87906 | 0.00001   | 0.96965 | 0.01519 | 0.85299 | N.C.    | N.C.    | ZSCAN18   |
| CITED2    | < 0.00001 | 0.98088 | 0.03534 | 0.75802 | 0.00020 | 0.95735 | 0.00024   | 0.92025 | 0.03910 | 0.74378 | N.C.    | N.C.    |           |
| TARS      | < 0.00001 | 0.98908 | N.C.    | N.C.    | 0.00064 | 0.92800 | 0.00005   | 0.94860 | 0.03441 | 0.76095 | N.C.    | N.C.    |           |
| TMCO1     | < 0.00001 | 0.99398 | 0.01643 | 0.84243 | 0.00024 | 0.95042 | 0.00038   | 0.90989 | 0.04725 | 0.72287 | N.C.    | N.C.    |           |
| DNAJB9    | 0.00009   | 0.93980 | 0.02022 | 0.82230 | 0.00024 | 0.95079 | 0.00328   | 0.83173 | N.C.    | N.C.    | N.C.    | N.C.    |           |
| NDUFV2    | 0.00003   | 0.95563 | N.C.    | N.C.    | 0.00236 | 0.89156 | 0.00041   | 0.90789 | N.C.    | N.C.    | 0.02149 | 0.78590 |           |
| ERAP1     | < 0.00001 | 0.99340 | 0.01362 | 0.86299 | 0.00046 | 0.93533 | 0.00034   | 0.91220 | N.C.    | N.C.    | N.C.    | N.C.    |           |
| DNASE2    | 0.00001   | 0.97373 | 0.01981 | 0.82363 | 0.00645 | 0.85266 | 0.00010   | 0.93745 | 0.02936 | 0.77779 | N.C.    | N.C.    |           |
| MPST      | 0.00187   | 0.85839 | 0.01632 | 0.84376 | 0.00142 | 0.90651 | 0.00036   | 0.91087 | 0.00715 | 0.92895 | N.C.    | N.C.    |           |
| LSM3      | 0.00174   | 0.86146 | N.C.    | N.C.    | 0.02373 | 0.77826 | 0.00006   | 0.94642 | N.C.    | N.C.    | 0.02994 | 0.76049 |           |
| CDV3      | < 0.00001 | 0.98855 | 0.03465 | 0.76023 | 0.00016 | 0.96358 | 0.00037   | 0.91057 | 0.04584 | 0.72590 | N.C.    | N.C.    |           |
| HERPUD1   | 0.00001   | 0.96730 | 0.00715 | 0.92612 | 0.00085 | 0.92047 | 0.00160   | 0.86475 | 0.01619 | 0.84673 | N.C.    | N.C.    |           |
| RPS19BP1  | 0.00159   | 0.86512 | 0.02711 | 0.78898 | 0.01796 | 0.79800 | 0.00011   | 0.93625 | 0.02264 | 0.81013 | N.C.    | N.C.    |           |
| CECR1     | 0.00004   | 0.95289 | 0.02423 | 0.80375 | 0.00022 | 0.95450 | 0.00236   | 0.84804 | N.C.    | N.C.    | N.C.    | N.C.    |           |
| SF3B5     | 0.00017   | 0.92793 | 0.01323 | 0.86487 | 0.00413 | 0.87175 | 0.00002   | 0.96297 | 0.02573 | 0.79542 | 0.03686 | 0.74355 |           |
| PSMD8     | 0.00001   | 0.97425 | 0.01122 | 0.87608 | 0.02011 | 0.79056 | 0.00001   | 0.96599 | 0.03096 | 0.77168 | N.C.    | N.C.    |           |
| ELL       | < 0.00001 | 0.98401 | 0.04364 | 0.73210 | 0.00224 | 0.89346 | 0.00041   | 0.90791 | N.C.    | N.C.    | N.C.    | N.C.    |           |
| NDUFAB1   | 0.00033   | 0.91338 | 0.02525 | 0.79818 | 0.01059 | 0.82848 | 0.00024   | 0.92073 | 0.03441 | 0.76080 | 0.00136 | 0.90753 |           |
| IMPAD1    | < 0.00001 | 0.98600 | 0.01182 | 0.87130 | 0.00045 | 0.93568 | 0.00023   | 0.92141 | 0.03979 | 0.74209 | N.C.    | N.C.    |           |
| EAF2      | 0.00001   | 0.96565 | 0.01122 | 0.87585 | 0.00760 | 0.84528 | 0.00074   | 0.89147 | 0.04163 | 0.73694 | 0.04460 | 0.72607 |           |
| KEAP1     | 0.00022   | 0.92228 | 0.04101 | 0.73836 | 0.00716 | 0.84830 | 0.00012   | 0.93398 | 0.03964 | 0.74255 | N.C.    | N.C.    |           |
| GLB1      | < 0.00001 | 0.98108 | 0.02488 | 0.80029 | 0.00023 | 0.95267 | 0.00004   | 0.95178 | 0.02230 | 0.81123 | N.C.    | N.C.    |           |
| LDLRAP1   | 0.00013   | 0.93354 | 0.03403 | 0.76235 | 0.03310 | 0.75277 | 0.00005   | 0.95005 | 0.04782 | 0.72150 | N.C.    | N.C.    |           |
| MRPS18A   | 0.00637   | 0.79685 | N.C.    | N.C.    | 0.01279 | 0.81830 | 0.00572   | 0.80280 | N.C.    | N.C.    | N.C.    | N.C.    |           |
| SERP1     | 0.00023   | 0.92172 | 0.01965 | 0.82421 | 0.00013 | 0.96900 | 0.00012   | 0.93500 | 0.02157 | 0.81656 | 0.03859 | 0.73938 |           |
| SLC7A1    | 0.00014   | 0.93096 | N.C.    | N.C.    | 0.00801 | 0.84271 | 0.00012   | 0.93452 | N.C.    | N.C.    | N.C.    | N.C.    |           |
| PSMD9     | 0.00091   | 0.88495 | 0.04192 | 0.73613 | 0.00751 | 0.84575 | 0.00121   | 0.87532 | 0.04599 | 0.72537 | N.C.    | N.C.    |           |
| TUFM      | 0.00051   | 0.90163 | 0.03663 | 0.75337 | 0.01591 | 0.80519 | 0.00004   | 0.95247 | 0.02829 | 0.78224 | 0.04585 | 0.72362 |           |
| COPA      | < 0.00001 | 0.99419 | 0.01562 | 0.85090 | 0.00085 | 0.92020 | 0.00003   | 0.95664 | 0.03951 | 0.74298 | N.C.    | N.C.    |           |
| GPR172A   | 0.00007   | 0.94500 | 0.02725 | 0.78749 | 0.00195 | 0.89740 | 0.00083   | 0.88825 | 0.02211 | 0.81227 | N.C.    | N.C.    |           |
| KIF21A    | 0.00440   | 0.81659 | N.C.    | N.C.    | 0.00654 | 0.85268 | 0.00592   | 0.80088 | N.C.    | N.C.    | N.C.    | N.C.    |           |
| EIF2S2    | < 0.00001 | 0.97697 | 0.00715 | 0.93265 | 0.00070 | 0.92605 | 0.00010   | 0.93813 | 0.00798 | 0.91134 | N.C.    | N.C.    |           |
| GNAS      | < 0.00001 | 0.98789 | 0.04847 | 0.72003 | 0.00045 | 0.93581 | 0.00011   | 0.93657 | N.C.    | N.C.    | N.C.    | N.C.    |           |
| MAP2K6    | 0.00017   | 0.92761 | 0.02831 | 0.78211 | 0.01532 | 0.80821 | 0.00104   | 0.88053 | N.C.    | N.C.    | 0.03988 | 0.73633 |           |
| FTSJ1     | 0.00019   | 0.92540 | N.C.    | N.C.    | 0.00309 | 0.88272 | 0.00003   | 0.95591 | N.C.    | N.C.    | N.C.    | N.C.    |           |
| PSMA6     | 0.00030   | 0.91566 | 0.01880 | 0.82776 | 0.00878 | 0.83826 | 0.00015   | 0.93008 | 0.03357 | 0.76387 | 0.03686 | 0.74350 |           |
| PSMB3     | 0.00033   | 0.91279 | N.C.    | N.C.    | 0.01591 | 0.80519 | 0.00002   | 0.96471 | N.C.    | N.C.    | 0.03898 | 0.73846 |           |
| PABPC4    | < 0.00001 | 0.99012 | 0.01619 | 0.84539 | 0.00008 | 0.98138 | 0.00008   | 0.94275 | 0.02025 | 0.82140 | N.C.    | N.C.    |           |
| TMED7     | 0.00001   | 0.97294 | 0.03812 | 0.74797 | 0.00071 | 0.92562 | 0.00120   | 0.87574 | 0.04197 | 0.73597 | N.C.    | N.C.    |           |
| GMSD      | 0.00001   | 0.96641 | 0.01659 | 0.84083 | 0.00351 | 0.87750 | 0.00030   | 0.91525 | 0.01486 | 0.85427 | 0.02172 | 0.78506 |           |
| YIPF1     | 0.00007   | 0.94313 | 0.01182 | 0.87120 | 0.04737 | 0.72097 | 0.00218   | 0.85168 | 0.02894 | 0.78004 | N.C.    | N.C.    |           |
| KIF13B    | 0.00006   | 0.94639 | 0.02147 | 0.81687 | 0.01443 | 0.81167 | 0.00088   | 0.88604 | 0.02440 | 0.80308 | N.C.    | N.C.    |           |
| ALDH18A1  | < 0.00001 | 0.97829 | N.C.    | N.C.    | 0.00413 | 0.87163 | 0.00051   | 0.90179 | N.C.    | N.C.    | N.C.    | N.C.    |           |
| FH        | 0.00177   | 0.86068 | N.C.    | N.C.    | 0.03420 | 0.74978 | 0.00045   | 0.90529 | N.C.    | N.C.    | 0.03645 | 0.74470 |           |
| IER3IP1   | 0.00003   | 0.95800 | 0.01848 | 0.83030 | 0.00380 | 0.87453 | 0.00002   | 0.96074 | 0.03668 | 0.75277 | 0.01225 | 0.82052 |           |
| DSTN      | < 0.00001 | 0.99130 | N.C.    | N.C.    | 0.00    |         |           |         |         |         |         |         |           |



|          |           |         |         |         |         |         |           |         |         |         |         |         |
|----------|-----------|---------|---------|---------|---------|---------|-----------|---------|---------|---------|---------|---------|
| IBTK     | < 0.00001 | 0.98339 | 0.03081 | 0.77205 | 0.00693 | 0.85005 | 0.00049   | 0.90315 | N.C.    | N.C.    | 0.03686 | 0.74347 |
| LRRRC8C  | 0.00001   | 0.96768 | 0.02106 | 0.81878 | 0.03142 | 0.75642 | 0.00004   | 0.95282 | 0.03081 | 0.77232 | N.C.    | N.C.    |
| CLPB     | 0.00319   | 0.83307 | 0.01323 | 0.86485 | 0.02522 | 0.77426 | 0.00080   | 0.88923 | 0.02161 | 0.81590 | N.C.    | N.C.    |
| TMED5    | < 0.00001 | 0.98895 | 0.02289 | 0.80869 | 0.00047 | 0.93426 | 0.00012   | 0.93482 | N.C.    | N.C.    | N.C.    | N.C.    |
| ATP5B    | 0.00007   | 0.94431 | N.C.    | N.C.    | 0.01844 | 0.79628 | 0.00004   | 0.95515 | N.C.    | N.C.    | 0.00637 | 0.85415 |
| SRP68    | < 0.00001 | 0.98424 | 0.02469 | 0.80117 | 0.00025 | 0.94884 | 0.00007   | 0.94308 | 0.04003 | 0.74079 | N.C.    | N.C.    |
| SLC30A5  | 0.00003   | 0.95533 | 0.01879 | 0.82857 | 0.00076 | 0.92404 | 0.00131   | 0.87272 | 0.04956 | 0.71807 | 0.01591 | 0.80539 |
| ERGIC3   | 0.00006   | 0.94746 | 0.00715 | 0.92534 | 0.00038 | 0.94006 | 0.00242   | 0.84693 | 0.03015 | 0.77435 | N.C.    | N.C.    |
| CERK     | 0.00013   | 0.93229 | 0.04638 | 0.72440 | 0.00173 | 0.90087 | 0.00008   | 0.94271 | 0.03620 | 0.75587 | N.C.    | N.C.    |
| SLC35C1  | 0.00019   | 0.92567 | 0.02618 | 0.79281 | 0.03711 | 0.74272 | 0.00169   | 0.86263 | 0.02177 | 0.81474 | N.C.    | N.C.    |
| GOLPH3   | 0.00003   | 0.95650 | 0.02957 | 0.77653 | 0.00004 | 0.98627 | 0.00103   | 0.88076 | N.C.    | N.C.    | N.C.    | N.C.    |
| GUSB     | 0.00002   | 0.96416 | 0.04533 | 0.72727 | 0.00656 | 0.85239 | 0.00015   | 0.93078 | 0.02785 | 0.78504 | N.C.    | N.C.    |
| UQCRC1   | 0.00195   | 0.85661 | 0.03836 | 0.74711 | 0.01663 | 0.80259 | 0.00011   | 0.93560 | 0.03834 | 0.74722 | N.C.    | N.C.    |
| TM9SF3   | < 0.00001 | 0.99498 | 0.04841 | 0.72018 | 0.00016 | 0.96394 | 0.00018   | 0.92680 | N.C.    | N.C.    | 0.01646 | 0.80323 |
| GSPT1    | 0.00007   | 0.94493 | N.C.    | N.C.    | 0.01745 | 0.79958 | 0.00011   | 0.93563 | 0.03488 | 0.75976 | 0.02193 | 0.78426 |
| TMEM59   | 0.00001   | 0.97405 | 0.02949 | 0.77697 | 0.00038 | 0.94012 | 0.00056   | 0.89930 | N.C.    | N.C.    | N.C.    | N.C.    |
| CCDC47   | 0.00001   | 0.97122 | 0.04418 | 0.73075 | 0.00527 | 0.86236 | 0.00014   | 0.93186 | N.C.    | N.C.    | N.C.    | N.C.    |
| CINP     | 0.00027   | 0.91733 | 0.02217 | 0.81182 | 0.03051 | 0.75922 | 0.00047   | 0.90415 | N.C.    | N.C.    | N.C.    | N.C.    |
| ST8SIA4  | 0.00005   | 0.95068 | N.C.    | N.C.    | 0.00802 | 0.84252 | 0.00235   | 0.84831 | N.C.    | N.C.    | N.C.    | N.C.    |
| NDUFB8   | 0.00094   | 0.88387 | 0.01975 | 0.82389 | 0.01326 | 0.81621 | 0.00058   | 0.89828 | N.C.    | N.C.    | N.C.    | N.C.    |
| PRRC1    | < 0.00001 | 0.97789 | 0.01934 | 0.82548 | 0.00515 | 0.86327 | 0.00030   | 0.91510 | N.C.    | N.C.    | 0.02196 | 0.78404 |
| PI4K2B   | 0.00001   | 0.96721 | 0.03753 | 0.75010 | 0.00412 | 0.87186 | 0.00012   | 0.93414 | N.C.    | N.C.    | N.C.    | N.C.    |
| ERH      | 0.00005   | 0.94924 | 0.01659 | 0.84128 | 0.02651 | 0.77008 | 0.00001   | 0.97425 | 0.04769 | 0.72194 | 0.04363 | 0.72803 |
| KRTCAP2  | 0.00006   | 0.94613 | N.C.    | N.C.    | 0.00015 | 0.96555 | 0.00038   | 0.90988 | N.C.    | N.C.    | N.C.    | N.C.    |
| TMEM70   | 0.00228   | 0.84988 | N.C.    | N.C.    | 0.00847 | 0.83984 | 0.00586   | 0.80143 | N.C.    | N.C.    | N.C.    | N.C.    |
| FDX1     | 0.00003   | 0.95753 | N.C.    | N.C.    | 0.00644 | 0.85355 | 0.00030   | 0.91540 | N.C.    | N.C.    | N.C.    | N.C.    |
| NDUFA1   | < 0.00001 | 0.98339 | N.C.    | N.C.    | 0.00130 | 0.90857 | 0.00023   | 0.92116 | N.C.    | N.C.    | 0.02303 | 0.78078 |
| RFC1     | < 0.00001 | 0.98353 | 0.01686 | 0.83996 | 0.00595 | 0.85696 | 0.00004   | 0.95403 | 0.03497 | 0.75896 | N.C.    | N.C.    |
| ATP5C1   | 0.00003   | 0.95675 | N.C.    | N.C.    | 0.00309 | 0.88239 | 0.00012   | 0.93531 | N.C.    | N.C.    | 0.00559 | 0.85962 |
| PRMT5    | 0.00009   | 0.93915 | N.C.    | N.C.    | 0.03475 | 0.74837 | 0.00003   | 0.95862 | N.C.    | N.C.    | 0.02854 | 0.76451 |
| POMP     | 0.00009   | 0.93951 | N.C.    | N.C.    | 0.00700 | 0.84951 | < 0.00001 | 0.98265 | N.C.    | N.C.    | 0.00146 | 0.90557 |
| SNRPG    | 0.00405   | 0.82103 | 0.02941 | 0.77761 | 0.03972 | 0.73684 | 0.00042   | 0.90701 | N.C.    | N.C.    | N.C.    | N.C.    |
| PDK1     | 0.00061   | 0.89684 | 0.00715 | 0.92177 | 0.00008 | 0.97426 | 0.01425   | 0.74729 | 0.04584 | 0.72586 | N.C.    | N.C.    |
| SLC7A11  | 0.00440   | 0.81654 | 0.02209 | 0.81254 | 0.00023 | 0.95200 | 0.01655   | 0.73666 | 0.03641 | 0.75462 | N.C.    | N.C.    |
| SNF8     | 0.00149   | 0.86751 | N.C.    | N.C.    | 0.00802 | 0.84245 | 0.00023   | 0.92207 | N.C.    | N.C.    | N.C.    | N.C.    |
| ARMCX3   | 0.00006   | 0.94693 | 0.02549 | 0.79679 | 0.00147 | 0.90526 | 0.00390   | 0.82299 | N.C.    | N.C.    | N.C.    | N.C.    |
| PIGK     | 0.00001   | 0.97263 | 0.02905 | 0.77921 | 0.00380 | 0.87449 | 0.00046   | 0.90469 | N.C.    | N.C.    | 0.01973 | 0.79231 |
| DAP      | 0.00002   | 0.96020 | N.C.    | N.C.    | 0.00488 | 0.86507 | 0.00006   | 0.94625 | N.C.    | N.C.    | N.C.    | N.C.    |
| PSMC3    | 0.00153   | 0.86651 | N.C.    | N.C.    | 0.00921 | 0.83579 | 0.00011   | 0.93615 | N.C.    | N.C.    | N.C.    | N.C.    |
| ZMPSTE24 | 0.00007   | 0.94510 | N.C.    | N.C.    | 0.00023 | 0.95312 | 0.00014   | 0.93105 | N.C.    | N.C.    | N.C.    | N.C.    |
| TMEM39A  | 0.00063   | 0.89609 | 0.02734 | 0.78711 | 0.00751 | 0.84578 | 0.00664   | 0.79465 | 0.01643 | 0.84229 | N.C.    | N.C.    |
| ATP5J2   | 0.00195   | 0.85660 | N.C.    | N.C.    | N.C.    | N.C.    | 0.00112   | 0.87797 | N.C.    | N.C.    | N.C.    | N.C.    |
| ANAPC5   | 0.00005   | 0.94925 | 0.02782 | 0.78519 | 0.00940 | 0.83457 | 0.00002   | 0.96286 | N.C.    | N.C.    | 0.02994 | 0.76046 |
| ARHGAP18 | 0.00064   | 0.89541 | N.C.    | N.C.    | 0.01476 | 0.81044 | 0.00983   | 0.77148 | N.C.    | N.C.    | 0.01360 | 0.81495 |
| RPS27L   | 0.00002   | 0.96548 | N.C.    | N.C.    | 0.00967 | 0.83284 | 0.00014   | 0.93135 | N.C.    | N.C.    | 0.01551 | 0.80735 |
| ARF1     | 0.00006   | 0.94787 | 0.02573 | 0.79577 | 0.00583 | 0.85792 | 0.00001   | 0.96691 | 0.02711 | 0.78853 | N.C.    | N.C.    |
| PSMB1    | 0.00005   | 0.94980 | 0.04575 | 0.72629 | 0.00310 | 0.88210 | < 0.00001 | 0.98853 | 0.04029 | 0.74010 | 0.00798 | 0.84307 |
| ATP6AP1  | < 0.00001 | 0.98233 | 0.03653 | 0.75382 | 0.00239 | 0.89100 | 0.00057   | 0.89871 | N.C.    | N.C.    | N.C.    | N.C.    |
| SEC31A   | < 0.00001 | 0.97945 | 0.04383 | 0.73173 | 0.00091 | 0.91807 | 0.00076   | 0.89067 | N.C.    | N.C.    | 0.01186 | 0.82262 |
| ATP6V0B  | 0.00016   | 0.92935 | 0.02971 | 0.77584 | 0.00073 | 0.92511 | 0.00008   | 0.94221 | 0.03497 | 0.75887 | 0.04250 | 0.73066 |
| CUTA     | 0.00008   | 0.94229 | N.C.    | N.C.    | 0.01018 | 0.83031 | 0.00002   | 0.96128 | 0.04485 | 0.72863 | N.C.    | N.C.    |
| CHST15   | 0.00002   | 0.96505 | 0.04515 | 0.72776 | 0.0009  | 0.91861 | 0.00087   | 0.88626 | N.C.    | N.C.    | N.C.    | N.C.    |
| ISG20    | 0.00180   | 0.86021 | 0.00866 | 0.89483 | 0.00092 | 0.91791 | 0.00584   | 0.80170 | 0.01772 | 0.83278 | N.C.    | N.C.    |
| ERO1L    | 0.00003   | 0.95951 | 0.03123 | 0.77037 | 0.00762 | 0.84510 | 0.00101   | 0.88159 | 0.04812 | 0.72089 | 0.01327 | 0.81610 |
| DECR1    | 0.00007   | 0.94481 | N.C.    | N.C.    | 0.02111 | 0.78730 | 0.00013   | 0.93249 | 0.03265 | 0.76643 | N.C.    | N.C.    |
| RPL36AL  | 0.00004   | 0.95291 | 0.04427 | 0.73054 | 0.00224 | 0.89344 | 0.00066   | 0.89468 | N.C.    | N.C.    | 0.03663 | 0.74432 |
| IFI35    | 0.00091   | 0.88478 | N.C.    | N.C.    | 0.00025 | 0.94935 | 0.00669   | 0.79420 | N.C.    | N.C.    | N.C.    | N.C.    |
| GUK1     | 0.00381   | 0.82427 | N.C.    | N.C.    | 0.00250 | 0.88927 | 0.00511   | 0.80887 | N.C.    | N.C.    | N.C.    | N.C.    |
| SLC10A7  | 0.00150   | 0.86725 | 0.00719 | 0.91705 | 0.00053 | 0.93205 | 0.00604   | 0.79973 | 0.03985 | 0.74191 | 0.00751 | 0.84581 |
| FAM96B   | 0.00249   | 0.84576 | N.C.    | N.C.    | 0.03938 | 0.73753 | 0.00025   | 0.91942 | N.C.    | N.C.    | N.C.    | N.C.    |
| R3HCC1   | 0.00421   | 0.81897 | 0.02549 | 0.79685 | 0.01059 | 0.82854 | 0.01021   | 0.76905 | N.C.    | N.C.    | N.C.    | N.C.    |
| DNAJC7   | 0.00001   | 0.97223 | 0.04388 | 0.73157 | 0.00041 | 0.93782 | 0.00019   | 0.92592 | N.C.    | N.C.    | N.C.    | N.C.    |
| ARL1     | 0.00036   | 0.91091 | 0.01686 | 0.83828 | 0.00198 | 0.89693 | 0.00680   | 0.79317 | N.C.    | N.C.    | 0.01901 | 0.79450 |
| SUMF2    | 0.00002   | 0.96153 | 0.02211 | 0.81235 | 0.00925 | 0.83551 | 0.00042   | 0.90719 | N.C.    | N.C.    | N.C.    | N.C.    |
| ERP29    | 0.00003   | 0.95561 | 0.01619 | 0.84544 | 0.00364 | 0.87604 | 0.00014   | 0.93144 | N.C.    | N.C.    | 0.01591 | 0.80513 |
| TXNDC12  | 0.00013   | 0.93247 | 0.03992 | 0.74154 | N.C.    | N.C.    | 0.00189   | 0.85797 | 0.03707 | 0.75126 | N.C.    | N.C.    |
| SLC35B2  | 0.00586   | 0.80148 | N.C.    | N.C.    | 0.02154 | 0.78569 | 0.00129   | 0.87328 | N.C.    | N.C.    | N.C.    | N.C.    |
| NCOA3    | 0.00040   | 0.90833 | 0.00856 | 0.89784 | 0.00466 | 0.86665 | 0.00597   | 0.80040 | N.C.    | N.C.    | N.C.    | N.C.    |
| EDF1     | 0.00026   | 0.91879 | N.C.    | N.C.    | 0.01318 | 0.81655 | 0.00002   | 0.96519 | N.C.    | N.C.    | N.C.    | N.C.    |
| SRSF9    | 0.00005   | 0.94988 | 0.03451 | 0.76054 | 0.00336 | 0.87922 | 0.00010   | 0.93799 | 0.01151 | 0.87375 | N.C.    | N.C.    |
| HAX1     | 0.00016   | 0.92911 | 0.01848 | 0.83066 | 0.00039 | 0.93932 | 0.00002   | 0.96289 | N.C.    | N.C.    | N.C.    | N.C.    |
| ASPHD2   | 0.00741   | 0.78841 | 0.01879 | 0.82849 | 0.02140 | 0.78631 | 0.03971   | 0.65744 | 0.01441 | 0.85810 | N.C.    | N.C.    |
| TMEM165  | 0.00001   | 0.97074 | 0.00715 | 0.91971 | 0.02166 | 0.78527 | 0.00093   | 0.88407 | 0.01032 | 0.88376 | N.C.    | N.C.    |
| SDHA     | 0.00164   | 0.86370 | N.C.    | N.C.    | 0.00847 | 0.83995 | 0.00240   | 0.84740 | N.C.    | N.C.    | N.C.    | N.C.    |
| MBTPS2   | 0.00023   | 0.92116 | 0.00953 | 0.88851 | 0.01591 | 0.80546 | 0.00738   | 0.78863 | 0.02711 | 0.78881 | N.C.    | N.C.    |
| SLC3A2   | 0.00007   | 0.94331 | N.C.    | N.C.    | 0.00424 | 0.87055 | 0.00002   | 0.96115 | N.C.    | N.C.    | N.C.    | N.C.    |
| GLG1     | 0.00001   | 0.97153 | 0.02786 | 0.78487 | 0.00274 | 0.88648 | 0.00125   | 0.87411 | N.C.    | N.C.    | 0.03141 | 0.75654 |
| PINK1    | 0.00009   | 0.94086 | N.C.    | N.C.    | 0.00087 | 0.91958 | 0.00045   | 0.90514 | N.C.    | N.C.    | N.C.    | N.C.    |
| CCDC117  | 0.00084   | 0.88751 | 0.00715 | 0.92022 | 0.01735 | 0.80001 | 0.00555   | 0.80436 | 0.00856 | 0.89623 | N.C.    | N.C.    |
| POLDIP2  | 0.00058   | 0.89835 | N.C.    | N.C.    | 0.00539 | 0.86136 | 0.00050   | 0.90235 | N.C.    | N.C.    | N.C.    | N.C.    |
| RPS6KB2  | 0.00412   | 0.82021 | 0.01686 | 0.83740 | 0.00413 | 0.87154 | 0.00076   | 0.89051 | 0.02894 | 0.77963 | N.C.    | N.C.    |
| PSMD7    | 0.00001   | 0.96588 | N.C.    | N.C.    | 0.01482 | 0.81010 | 0.00009   | 0.94030 | N.C.    | N.C.    | N.C.    | N.C.    |
| CD99L2   | 0.00159   | 0.86517 | 0.03887 | 0.74505 | 0.04488 | 0.72542 | 0.00383   | 0.82391 | 0.02658 | 0.79120 | N.C.    | N.C.    |
| PRDM15   | 0.01488   | 0.74412 | 0.01475 | 0.85571 | 0.00717 | 0.84821 | N.C.      | N.C.    | N.C.    | N.C.    | N.C.    | N.C.    |
| ERC1     | 0.00003   | 0.95566 | 0.00962 | 0.88735 | 0.00130 | 0.90858 | 0.00072   | 0.89240 | N.C.    | N.C.    | N.C.    | N.C.    |

|           |           |          |         |          |         |          |           |          |         |          |         |          |
|-----------|-----------|----------|---------|----------|---------|----------|-----------|----------|---------|----------|---------|----------|
| RAP1GDS1  | 0.00009   | 0.93939  | 0.01686 | 0.83793  | 0.00016 | 0.96264  | 0.00437   | 0.81693  | N.C.    | N.C.     | N.C.    | N.C.     |
| SLAMF1    | 0.00091   | 0.88501  | 0.01858 | 0.82962  | 0.00583 | 0.85787  | 0.00292   | 0.83785  | 0.04962 | 0.71782  | N.C.    | N.C.     |
| ATF4      | 0.00012   | 0.93527  | N.C.    | N.C.     | 0.00040 | 0.93843  | 0.00057   | 0.89885  | N.C.    | N.C.     | N.C.    | N.C.     |
| C1orf43   | 0.00015   | 0.93035  | 0.02920 | 0.77835  | 0.00033 | 0.94440  | < 0.00001 | 0.98379  | N.C.    | N.C.     | N.C.    | N.C.     |
| METTL7A   | 0.00014   | 0.93112  | 0.00715 | 0.91849  | 0.00665 | 0.85184  | 0.00461   | 0.81394  | 0.03096 | 0.77161  | N.C.    | N.C.     |
| EIF5A     | 0.00405   | 0.82120  | 0.03663 | 0.75337  | 0.02298 | 0.78118  | 0.00040   | 0.90812  | 0.03351 | 0.76414  | 0.00644 | 0.85368  |
| CCDC69    | 0.00001   | 0.96893  | 0.03668 | 0.75279  | 0.00796 | 0.84321  | 0.00010   | 0.93831  | N.C.    | N.C.     | 0.01164 | 0.82355  |
| RBM3      | 0.00065   | 0.89536  | N.C.    | N.C.     | 0.02293 | 0.78136  | 0.00078   | 0.88997  | N.C.    | N.C.     | 0.02577 | 0.77222  |
| APOBEC3C  | 0.00058   | 0.89814  | 0.03276 | 0.76585  | 0.04021 | 0.73533  | 0.00025   | 0.91926  | 0.04235 | 0.73503  | N.C.    | N.C.     |
| SEC11A    | 0.00011   | 0.93552  | 0.02482 | 0.80075  | 0.00089 | 0.91889  | 0.00310   | 0.83457  | N.C.    | N.C.     | 0.02994 | 0.76055  |
| SERF2     | 0.02888   | 0.68996  | 0.00715 | 0.92014  | 0.00413 | 0.87166  | 0.00187   | 0.85841  | 0.01151 | 0.87347  | N.C.    | N.C.     |
| ARCN1     | 0.00004   | 0.95396  | 0.00923 | 0.89061  | 0.00086 | 0.91997  | 0.00155   | 0.86607  | 0.01090 | 0.87819  | N.C.    | N.C.     |
| YKT6      | 0.00006   | 0.94784  | N.C.    | N.C.     | 0.00078 | 0.92330  | 0.00028   | 0.91709  | N.C.    | N.C.     | N.C.    | N.C.     |
| MRPL3     | 0.00008   | 0.94173  | 0.01182 | 0.87086  | 0.01546 | 0.80763  | 0.00013   | 0.93343  | 0.01045 | 0.88136  | 0.03730 | 0.74226  |
| EIF3J     | 0.00135   | 0.87155  | N.C.    | N.C.     | N.C.    | N.C.     | 0.00124   | 0.87449  | 0.04444 | 0.72969  | N.C.    | N.C.     |
| DDX1      | 0.00003   | 0.95772  | N.C.    | N.C.     | 0.02812 | 0.76607  | 0.00083   | 0.88814  | N.C.    | N.C.     | 0.04320 | 0.72905  |
| TBL2      | 0.00043   | 0.90637  | 0.01182 | 0.87085  | 0.00544 | 0.86100  | 0.00553   | 0.80459  | 0.02586 | 0.79451  | N.C.    | N.C.     |
| PGRMC2    | 0.00044   | 0.90603  | 0.00227 | 0.95607  | 0.00245 | 0.89008  | 0.00907   | 0.77643  | 0.01686 | 0.83939  | N.C.    | N.C.     |
| TAF12     | 0.00077   | 0.89033  | N.C.    | N.C.     | 0.01118 | 0.82579  | 0.01743   | 0.73299  | N.C.    | N.C.     | N.C.    | N.C.     |
| PSME1     | 0.02299   | 0.71136  | 0.02106 | 0.81866  | 0.00089 | 0.91888  | 0.01390   | 0.74901  | 0.04124 | 0.73785  | 0.01618 | 0.80424  |
| IFNAR1    | 0.00004   | 0.95497  | 0.02525 | 0.79794  | 0.00181 | 0.89960  | 0.00302   | 0.83606  | N.C.    | N.C.     | N.C.    | N.C.     |
| B2M       | 0.00328   | 0.83161  | 0.01686 | 0.83911  | 0.00008 | 0.97592  | 0.02505   | 0.70378  | 0.04515 | 0.72781  | N.C.    | N.C.     |
| BAG1      | 0.00599   | 0.80016  | 0.04832 | 0.72040  | 0.03168 | 0.75579  | 0.00367   | 0.82604  | N.C.    | N.C.     | N.C.    | N.C.     |
| SEPT10    | 0.0001    | -0.93754 | N.C.    | N.C.     | N.C.    | N.C.     | N.C.      | N.C.     | N.C.    | N.C.     | N.C.    | N.C.     |
| TTC24     | 0.00001   | -0.96861 | 0.02602 | -0.79382 | 0.00644 | -0.85363 | 0.00031   | -0.91443 | N.C.    | N.C.     | N.C.    | N.C.     |
| RUNDG2C   | < 0.00001 | -0.97811 | 0.02324 | -0.80725 | 0.01305 | -0.81719 | 0.00001   | -0.96579 | 0.03404 | -0.76212 | N.C.    | N.C.     |
| SESTD1    | 0.00049   | -0.90275 | 0.01619 | -0.84762 | 0.02180 | -0.78472 | 0.00099   | -0.88229 | 0.02729 | -0.78730 | N.C.    | N.C.     |
| LCN10     | 0.00004   | -0.95340 | N.C.    | N.C.     | 0.03791 | -0.74095 | 0.00104   | -0.88030 | N.C.    | N.C.     | N.C.    | N.C.     |
| SAMD4A    | 0.01550   | -0.74118 | N.C.    | N.C.     | 0.03420 | -0.74992 | 0.03110   | -0.68241 | N.C.    | N.C.     | N.C.    | N.C.     |
| KCNIP2    | 0.00515   | -0.80835 | 0.04101 | -0.73840 | 0.02323 | -0.77976 | 0.01362   | -0.75041 | N.C.    | N.C.     | N.C.    | N.C.     |
| DDX60L    | 0.00017   | -0.92734 | 0.02969 | -0.77617 | 0.02737 | -0.76801 | 0.00012   | -0.93498 | 0.02711 | -0.78815 | N.C.    | N.C.     |
| ABCA1     | 0.01526   | -0.74239 | N.C.    | N.C.     | 0.03406 | -0.75024 | 0.02178   | -0.71601 | N.C.    | N.C.     | N.C.    | N.C.     |
| BIRC3     | 0.00002   | -0.96289 | N.C.    | N.C.     | 0.00449 | -0.86847 | 0.00015   | -0.92999 | N.C.    | N.C.     | 0.02651 | -0.77010 |
| LY86      | 0.00003   | -0.95765 | N.C.    | N.C.     | 0.02047 | -0.78930 | 0.00046   | -0.90457 | 0.03704 | -0.75149 | N.C.    | N.C.     |
| ZFP36L1   | 0.00007   | -0.94495 | 0.02649 | -0.79184 | 0.00888 | -0.83777 | 0.00083   | -0.88820 | N.C.    | N.C.     | N.C.    | N.C.     |
| GGT7      | 0.00002   | -0.96281 | 0.04584 | -0.72573 | 0.01591 | -0.80550 | 0.00263   | -0.84298 | N.C.    | N.C.     | N.C.    | N.C.     |
| VAV3      | 0.00073   | -0.89185 | 0.02320 | -0.80779 | 0.00085 | -0.92041 | 0.00032   | -0.91378 | 0.02894 | -0.78001 | N.C.    | N.C.     |
| TTC39C    | 0.00006   | -0.94550 | N.C.    | N.C.     | 0.01561 | -0.80689 | 0.00026   | -0.91850 | N.C.    | N.C.     | N.C.    | N.C.     |
| CHD3      | 0.00002   | -0.96263 | 0.00923 | -0.89230 | 0.00112 | -0.91234 | 0.00066   | -0.89480 | N.C.    | N.C.     | 0.04126 | -0.73322 |
| RIMKLB    | 0.00291   | -0.83797 | 0.01632 | -0.84375 | 0.02140 | -0.78632 | 0.00964   | -0.77261 | 0.04607 | -0.72516 | N.C.    | N.C.     |
| GAPT      | 0.00024   | -0.92023 | 0.02616 | -0.79304 | 0.02303 | -0.78078 | 0.00027   | -0.91781 | N.C.    | N.C.     | 0.02189 | -0.78443 |
| TNFRSF10B | 0.00001   | -0.96987 | 0.01886 | -0.82714 | 0.04079 | -0.73411 | 0.00049   | -0.90305 | 0.03669 | -0.75235 | N.C.    | N.C.     |
| JUP       | 0.00010   | -0.93843 | 0.02489 | -0.80005 | 0.00794 | -0.84343 | 0.00266   | -0.84252 | N.C.    | N.C.     | 0.02649 | -0.77027 |
| KIAA1407  | 0.00030   | -0.91504 | 0.03904 | -0.74396 | 0.01193 | -0.82224 | 0.00293   | -0.83763 | 0.01865 | -0.82921 | N.C.    | N.C.     |
| AFF3      | 0.00027   | -0.91791 | N.C.    | N.C.     | 0.00046 | -0.93466 | 0.00026   | -0.91867 | N.C.    | N.C.     | N.C.    | N.C.     |
| FMNL3     | < 0.00001 | -0.99027 | 0.01706 | -0.83541 | 0.00058 | -0.93024 | 0.00006   | -0.94654 | 0.01848 | -0.83018 | 0.00969 | -0.83266 |
| L3MBTL3   | 0.00002   | -0.96534 | 0.03620 | -0.75561 | 0.00379 | -0.87471 | 0.00049   | -0.90274 | 0.01709 | -0.83511 | N.C.    | N.C.     |
| FOXP1     | 0.00001   | -0.96610 | 0.04003 | -0.74079 | 0.00847 | -0.83986 | 0.00026   | -0.91856 | N.C.    | N.C.     | N.C.    | N.C.     |
| ZMAT1     | 0.00025   | -0.91914 | 0.03289 | -0.76554 | 0.00249 | -0.88954 | 0.00113   | -0.87770 | 0.03667 | -0.75315 | N.C.    | N.C.     |
| ATAD2B    | 0.00020   | -0.92432 | 0.04485 | -0.72870 | 0.00938 | -0.83474 | 0.00038   | -0.90992 | N.C.    | N.C.     | N.C.    | N.C.     |
| SATB1     | 0.00011   | -0.93708 | 0.03620 | -0.75537 | 0.00153 | -0.90413 | 0.00089   | -0.88559 | N.C.    | N.C.     | 0.04546 | -0.72441 |
| BACH2     | 0.00027   | -0.91807 | N.C.    | N.C.     | 0.01011 | -0.83078 | 0.00164   | -0.86368 | N.C.    | N.C.     | N.C.    | N.C.     |
| TMOD2     | 0.00086   | -0.88690 | N.C.    | N.C.     | 0.00095 | -0.91663 | 0.00817   | -0.78252 | N.C.    | N.C.     | N.C.    | N.C.     |
| INADL     | 0.00067   | -0.89452 | 0.04599 | -0.72536 | 0.00112 | -0.91256 | 0.00122   | -0.87506 | N.C.    | N.C.     | 0.02737 | -0.76809 |
| PLEKHA1   | 0.00243   | -0.84668 | 0.03653 | -0.75431 | 0.00795 | -0.84332 | 0.00771   | -0.78591 | 0.02106 | -0.81896 | N.C.    | N.C.     |
| PTBP2     | 0.00110   | -0.87860 | 0.03555 | -0.75749 | N.C.    | N.C.     | 0.00166   | -0.86321 | N.C.    | N.C.     | N.C.    | N.C.     |
| PDE7A     | 0.00002   | -0.96086 | N.C.    | N.C.     | 0.00241 | -0.89072 | 0.00014   | -0.93201 | N.C.    | N.C.     | N.C.    | N.C.     |
| ZNF238    | 0.00008   | -0.94151 | N.C.    | N.C.     | 0.00112 | -0.91245 | 0.00038   | -0.90972 | N.C.    | N.C.     | 0.03127 | -0.75694 |
| HLA-DOB   | < 0.00001 | -0.97553 | 0.04485 | -0.72858 | 0.00925 | -0.83543 | 0.00034   | -0.91210 | N.C.    | N.C.     | N.C.    | N.C.     |
| PTGS1     | 0.00168   | -0.86274 | 0.01554 | -0.85141 | 0.00740 | -0.84652 | 0.00079   | -0.88945 | N.C.    | N.C.     | 0.00557 | -0.85988 |
| HLA-DMB   | < 0.00001 | -0.98050 | N.C.    | N.C.     | 0.00108 | -0.91360 | 0.00024   | -0.92088 | N.C.    | N.C.     | N.C.    | N.C.     |
| MOBK1A    | 0.00002   | -0.96425 | 0.01186 | -0.87005 | 0.00740 | -0.84660 | 0.00109   | -0.87897 | 0.01325 | -0.86424 | N.C.    | N.C.     |
| CDC14A    | 0.00083   | -0.88810 | 0.01619 | -0.84635 | 0.01206 | -0.82143 | 0.00060   | -0.89753 | 0.03620 | -0.75568 | 0.04576 | -0.72383 |
| PLEKHG1   | 0.00001   | -0.96672 | N.C.    | N.C.     | 0.01141 | -0.82472 | 0.00001   | -0.96977 | N.C.    | N.C.     | N.C.    | N.C.     |
| AIM1      | 0.00006   | -0.94777 | N.C.    | N.C.     | 0.00018 | -0.96014 | 0.00023   | -0.92118 | N.C.    | N.C.     | 0.02552 | -0.77312 |
| ADRBK2    | 0.00009   | -0.94052 | N.C.    | N.C.     | 0.01193 | -0.82225 | 0.00067   | -0.89429 | N.C.    | N.C.     | N.C.    | N.C.     |
| BANK1     | 0.00007   | -0.94453 | N.C.    | N.C.     | 0.00164 | -0.90236 | 0.00007   | -0.94351 | 0.04969 | -0.71765 | N.C.    | N.C.     |
| CAMK2D    | 0.00009   | -0.93937 | N.C.    | N.C.     | 0.00556 | -0.86000 | 0.00074   | -0.89136 | N.C.    | N.C.     | N.C.    | N.C.     |
| ABLIM1    | 0.00005   | -0.95140 | 0.03073 | -0.77288 | 0.00243 | -0.89035 | 0.00014   | -0.93173 | 0.03384 | -0.76317 | N.C.    | N.C.     |
| KIAA1147  | 0.00012   | -0.93518 | 0.02324 | -0.80715 | 0.00111 | -0.91274 | 0.00042   | -0.90700 | 0.02786 | -0.78450 | N.C.    | N.C.     |
| FAM129C   | 0.00004   | -0.95372 | 0.04832 | -0.72039 | 0.00096 | -0.91651 | 0.00279   | -0.83995 | N.C.    | N.C.     | N.C.    | N.C.     |
| TET3      | 0.00045   | -0.90515 | 0.00810 | -0.90418 | N.C.    | N.C.     | 0.00062   | -0.89666 | 0.03971 | -0.74227 | N.C.    | N.C.     |
| PHF15     | < 0.00001 | -0.97747 | N.C.    | N.C.     | 0.00953 | -0.83361 | 0.00013   | -0.93266 | N.C.    | N.C.     | N.C.    | N.C.     |
| HVCN1     | 0.00002   | -0.96254 | 0.02398 | -0.80465 | 0.01620 | -0.80411 | 0.00055   | -0.89959 | N.C.    | N.C.     | N.C.    | N.C.     |
| CR2       | 0.00052   | -0.90107 | 0.02793 | -0.78410 | 0.00088 | -0.91934 | 0.00180   | -0.86018 | N.C.    | N.C.     | N.C.    | N.C.     |
| MS4A1     | 0.00001   | -0.97155 | 0.02642 | -0.79210 | 0.00645 | -0.85332 | 0.00010   | -0.93841 | 0.02204 | -0.81290 | 0.03809 | -0.74050 |
| CD22      | 0.00001   | -0.97245 | 0.01881 | -0.82748 | 0.00054 | -0.93179 | 0.00073   | -0.89180 | 0.03404 | -0.76208 | 0.03572 | -0.74610 |
| ARHGAP17  | < 0.00001 | -0.97817 | 0.04081 | -0.73890 | 0.01163 | -0.82367 | 0.00027   | -0.91801 | N.C.    | N.C.     | 0.01289 | -0.81778 |
| CYP2U1    | 0.00012   | -0.93523 | N.C.    | N.C.     | 0.03862 | -0.73921 | 0.00086   | -0.88693 | N.C.    | N.C.     | 0.03881 | -0.73883 |
| SNX22     | 0.00003   | -0.95734 | 0.01713 | -0.83488 | 0.00637 | -0.85426 | 0.00191   | -0.85738 | N.C.    | N.C.     | 0.03477 | -0.74825 |
| ZNF318    | 0.00124   | -0.87468 | 0.02440 | -0.80325 | 0.03668 | -0.74412 | 0.00342   | -0.82943 | 0.03632 | -0.75501 | N.C.    | N.C.     |
| FAM65A    | 0.00002   | -0.96006 | 0.03812 | -0.74789 | 0.00337 | -0.87898 | 0.00094   | -0.88370 | N.C.    | N.C.     | 0.03017 | -0.75996 |
| GABBR1    | 0.00040   | -0.90856 | 0.04192 | -0.73632 | 0.01687 | -0.80171 | 0.00632   | -0.79728 | N.C.    | N.C.     | N.C.    | N.C.     |
| LRRK2     | 0.00107   | -0.87946 | N.C.    | N.C.     | 0.02954 | -0.76185 | 0.00040   | -0.90846 | N.C.    | N.C.     | N.C.    | N.C.     |
| HHEX      | 0.00004   | -0.95261 | N.C.    | N.C.     | 0.01741 | -0.79978 | 0.00053   | -0.90073 | N.C.    | N.C.     | N.C.    | N.C.     |

|            |           |          |         |          |         |          |         |          |         |          |         |          |
|------------|-----------|----------|---------|----------|---------|----------|---------|----------|---------|----------|---------|----------|
| DOPEY2     | 0.00019   | -0.92561 | N.C.    | N.C.     | 0.00199 | -0.89677 | 0.00173 | -0.86181 | N.C.    | N.C.     | N.C.    | N.C.     |
| CIITA      | 0.00004   | -0.95481 | 0.03265 | -0.76620 | 0.00801 | -0.84270 | 0.00043 | -0.90637 | N.C.    | N.C.     | 0.03311 | -0.75252 |
| PAX5       | 0.00002   | -0.96166 | N.C.    | N.C.     | 0.01096 | -0.82683 | 0.00014 | -0.93130 | N.C.    | N.C.     | N.C.    | N.C.     |
| PIK3CD     | 0.00003   | -0.95882 | 0.01959 | -0.82460 | 0.00453 | -0.86805 | 0.00124 | -0.87454 | N.C.    | N.C.     | 0.00626 | -0.85493 |
| BCL11A     | 0.00002   | -0.96512 | N.C.    | N.C.     | 0.01155 | -0.82408 | 0.00005 | -0.94991 | N.C.    | N.C.     | N.C.    | N.C.     |
| TAGLN      | 0.00309   | -0.83479 | N.C.    | N.C.     | 0.00599 | -0.85656 | 0.01387 | -0.74913 | N.C.    | N.C.     | 0.00181 | -0.89953 |
| IRF8       | 0.00003   | -0.95671 | 0.03707 | -0.75123 | 0.00253 | -0.88892 | 0.00131 | -0.87248 | 0.02523 | -0.79848 | N.C.    | N.C.     |
| SMAD3      | 0.00005   | -0.95087 | 0.01843 | -0.83097 | 0.00163 | -0.90264 | 0.00100 | -0.88170 | 0.02193 | -0.81375 | N.C.    | N.C.     |
| ZNF107     | 0.00017   | -0.92802 | N.C.    | N.C.     | 0.00078 | -0.92349 | 0.00145 | -0.86878 | N.C.    | N.C.     | N.C.    | N.C.     |
| ZNF516     | 0.00013   | -0.93307 | 0.01686 | -0.83838 | 0.01373 | -0.81447 | 0.00020 | -0.92435 | N.C.    | N.C.     | N.C.    | N.C.     |
| BCL2       | 0.00083   | -0.88805 | N.C.    | N.C.     | 0.00342 | -0.87848 | 0.00077 | -0.89016 | N.C.    | N.C.     | N.C.    | N.C.     |
| FCRLA      | 0.00002   | -0.96493 | N.C.    | N.C.     | 0.00899 | -0.83716 | 0.00008 | -0.94186 | N.C.    | N.C.     | 0.02108 | -0.78744 |
| ZNF320     | 0.00279   | -0.83995 | N.C.    | N.C.     | 0.00656 | -0.85238 | 0.00069 | -0.89336 | N.C.    | N.C.     | N.C.    | N.C.     |
| ITPR1      | 0.00042   | -0.90690 | N.C.    | N.C.     | 0.01690 | -0.80148 | 0.00087 | -0.88658 | N.C.    | N.C.     | N.C.    | N.C.     |
| PIK3C2B    | 0.00001   | -0.97250 | 0.01686 | -0.83685 | 0.00299 | -0.88382 | 0.00041 | -0.90760 | 0.04242 | -0.73483 | N.C.    | N.C.     |
| TNFRSF13C  | 0.00007   | -0.94534 | N.C.    | N.C.     | 0.02510 | -0.77458 | 0.00149 | -0.86744 | N.C.    | N.C.     | N.C.    | N.C.     |
| ZNF154     | 0.00027   | -0.91812 | 0.03887 | -0.74498 | 0.02824 | -0.76539 | 0.00027 | -0.91770 | N.C.    | N.C.     | N.C.    | N.C.     |
| HLA-DOA    | 0.00005   | -0.94906 | 0.03186 | -0.76892 | 0.00865 | -0.83899 | 0.00022 | -0.92263 | 0.04444 | -0.72961 | N.C.    | N.C.     |
| ZNF525     | 0.00837   | -0.78113 | 0.01441 | -0.85943 | 0.00038 | -0.94008 | 0.00194 | -0.85687 | N.C.    | N.C.     | N.C.    | N.C.     |
| DYRK2      | 0.00004   | -0.95239 | N.C.    | N.C.     | 0.00093 | -0.91731 | 0.00009 | -0.93965 | N.C.    | N.C.     | N.C.    | N.C.     |
| CNR2       | 0.00005   | -0.95104 | 0.00810 | -0.90282 | 0.00356 | -0.87683 | 0.00055 | -0.90001 | 0.01441 | -0.85926 | 0.02547 | -0.77359 |
| ZCCHC18    | 0.00097   | -0.88297 | N.C.    | N.C.     | 0.02557 | -0.77275 | 0.00636 | -0.79696 | N.C.    | N.C.     | N.C.    | N.C.     |
| BEND4      | 0.00371   | -0.82554 | N.C.    | N.C.     | 0.02709 | -0.76875 | 0.00426 | -0.81834 | N.C.    | N.C.     | N.C.    | N.C.     |
| WDFY4      | 0.00001   | -0.96929 | 0.04743 | -0.72239 | 0.00345 | -0.87813 | 0.00011 | -0.93551 | N.C.    | N.C.     | 0.02960 | -0.76155 |
| PPFIBP1    | 0.00938   | -0.77435 | N.C.    | N.C.     | N.C.    | N.C.     | 0.00158 | -0.86525 | N.C.    | N.C.     | N.C.    | N.C.     |
| ALOX5      | 0.00005   | -0.94940 | 0.02191 | -0.81416 | 0.00374 | -0.87513 | 0.00403 | -0.82137 | N.C.    | N.C.     | 0.02339 | -0.77924 |
| FCRL2      | 0.00022   | -0.92289 | N.C.    | N.C.     | 0.00322 | -0.88083 | 0.00368 | -0.82595 | N.C.    | N.C.     | N.C.    | N.C.     |
| RAB12      | 0.00156   | -0.86591 | 0.01612 | -0.84818 | N.C.    | N.C.     | 0.01322 | -0.75248 | 0.02706 | -0.78943 | N.C.    | N.C.     |
| FCGBP      | 0.00552   | -0.80469 | N.C.    | N.C.     | N.C.    | N.C.     | 0.03143 | -0.68144 | N.C.    | N.C.     | N.C.    | N.C.     |
| SLC4A7     | 0.00161   | -0.86449 | 0.02440 | -0.80257 | 0.02949 | -0.76206 | 0.00589 | -0.80117 | 0.03265 | -0.76691 | N.C.    | N.C.     |
| QRSL1      | 0.00101   | -0.88142 | N.C.    | N.C.     | 0.01067 | -0.82814 | 0.00176 | -0.86111 | N.C.    | N.C.     | 0.01519 | -0.80871 |
| SYNGAP1    | 0.00004   | -0.95375 | 0.01229 | -0.86849 | 0.00038 | -0.93994 | 0.00202 | -0.85500 | 0.03384 | -0.76291 | N.C.    | N.C.     |
| GCA        | 0.00043   | -0.90620 | N.C.    | N.C.     | 0.03359 | -0.75129 | 0.00362 | -0.82670 | N.C.    | N.C.     | N.C.    | N.C.     |
| ENDOD1     | 0.00052   | -0.90123 | 0.01090 | -0.87858 | 0.01447 | -0.81149 | 0.00025 | -0.91924 | 0.03269 | -0.76605 | N.C.    | N.C.     |
| PARVG      | < 0.00001 | -0.98192 | 0.01624 | -0.84467 | 0.01840 | -0.79653 | 0.00058 | -0.89816 | 0.04003 | -0.74099 | 0.02931 | -0.76263 |
| KMO        | 0.00010   | -0.93866 | N.C.    | N.C.     | 0.00309 | -0.88258 | 0.00009 | -0.94070 | 0.03902 | -0.74425 | N.C.    | N.C.     |
| ARRDC2     | 0.00012   | -0.93406 | N.C.    | N.C.     | 0.00064 | -0.92779 | 0.00328 | -0.83175 | N.C.    | N.C.     | N.C.    | N.C.     |
| HLA-DRA    | 0.00005   | -0.94881 | N.C.    | N.C.     | 0.00281 | -0.88555 | 0.00011 | -0.93545 | N.C.    | N.C.     | N.C.    | N.C.     |
| SCN3A      | 0.00111   | -0.87817 | N.C.    | N.C.     | 0.00245 | -0.89013 | 0.00379 | -0.82458 | N.C.    | N.C.     | N.C.    | N.C.     |
| CD37       | 0.00001   | -0.97237 | N.C.    | N.C.     | 0.00196 | -0.89725 | 0.00140 | -0.87009 | N.C.    | N.C.     | 0.02960 | -0.76156 |
| PARP15     | 0.00054   | -0.90049 | 0.04325 | -0.73312 | 0.02593 | -0.77181 | 0.00267 | -0.84233 | 0.03812 | -0.74804 | N.C.    | N.C.     |
| ZNF302     | 0.00015   | -0.92966 | 0.02935 | -0.77789 | 0.02157 | -0.78556 | 0.00341 | -0.82976 | N.C.    | N.C.     | N.C.    | N.C.     |
| RASGRP2    | 0.00004   | -0.95208 | 0.02824 | -0.78251 | 0.00107 | -0.91401 | 0.00266 | -0.84253 | N.C.    | N.C.     | 0.01428 | -0.81229 |
| AASS       | 0.00164   | -0.86371 | 0.03620 | -0.75605 | 0.02305 | -0.78044 | 0.00412 | -0.82009 | N.C.    | N.C.     | N.C.    | N.C.     |
| FCER2      | 0.00004   | -0.95404 | 0.03887 | -0.74491 | 0.02125 | -0.78691 | 0.00262 | -0.84322 | N.C.    | N.C.     | 0.01747 | -0.79947 |
| ZNF83      | 0.00009   | -0.94025 | 0.02289 | -0.80862 | 0.00669 | -0.85156 | 0.00258 | -0.84389 | 0.02289 | -0.80874 | N.C.    | N.C.     |
| OFD1       | 0.00003   | -0.95605 | 0.03669 | -0.75233 | 0.00455 | -0.86763 | 0.00220 | -0.85125 | N.C.    | N.C.     | N.C.    | N.C.     |
| TSPAN33    | 0.00002   | -0.96289 | N.C.    | N.C.     | 0.00977 | -0.83223 | 0.00057 | -0.89856 | N.C.    | N.C.     | 0.03543 | -0.74682 |
| CLEC17A    | 0.00004   | -0.95216 | 0.02025 | -0.82176 | 0.00592 | -0.85727 | 0.00058 | -0.89811 | 0.02786 | -0.78448 | N.C.    | N.C.     |
| RNF44      | 0.00004   | -0.95222 | 0.02822 | -0.78278 | 0.00130 | -0.90867 | 0.00166 | -0.86327 | N.C.    | N.C.     | 0.02069 | -0.78861 |
| PLAGL1     | 0.00011   | -0.93593 | N.C.    | N.C.     | 0.03541 | -0.74692 | 0.00103 | -0.88073 | N.C.    | N.C.     | N.C.    | N.C.     |
| SEPN1      | 0.00059   | -0.89765 | 0.03081 | -0.77218 | 0.01140 | -0.82492 | 0.00290 | -0.83814 | N.C.    | N.C.     | N.C.    | N.C.     |
| PILRB      | 0.00027   | -0.91783 | 0.01686 | -0.83700 | 0.01591 | -0.80508 | 0.00324 | -0.83227 | N.C.    | N.C.     | N.C.    | N.C.     |
| MICAL3     | 0.00003   | -0.95904 | 0.03265 | -0.76634 | 0.00309 | -0.88263 | 0.00038 | -0.90950 | 0.03653 | -0.75389 | N.C.    | N.C.     |
| SELL       | 0.00023   | -0.92123 | 0.00810 | -0.90224 | 0.00299 | -0.88371 | 0.00232 | -0.84870 | N.C.    | N.C.     | N.C.    | N.C.     |
| CEP110     | 0.00004   | -0.95337 | N.C.    | N.C.     | 0.00603 | -0.85624 | 0.00037 | -0.91023 | N.C.    | N.C.     | N.C.    | N.C.     |
| GLI1P1     | 0.00494   | -0.81059 | 0.01910 | -0.82649 | 0.00353 | -0.87724 | 0.01195 | -0.75922 | 0.01632 | -0.84329 | N.C.    | N.C.     |
| ZNF767     | 0.00004   | -0.95436 | 0.04444 | -0.72975 | 0.01591 | -0.80521 | 0.00091 | -0.88475 | N.C.    | N.C.     | N.C.    | N.C.     |
| GLT25D1    | 0.00004   | -0.95363 | 0.03235 | -0.76781 | 0.02598 | -0.77156 | 0.00420 | -0.81910 | 0.04584 | -0.72572 | N.C.    | N.C.     |
| C13orf18   | 0.00001   | -0.96903 | 0.03112 | -0.77095 | 0.00021 | -0.95480 | 0.00034 | -0.91205 | 0.03812 | -0.74836 | N.C.    | N.C.     |
| ZNF333     | 0.00074   | -0.89147 | 0.02104 | -0.81916 | 0.03420 | -0.74985 | 0.00086 | -0.88704 | 0.01081 | -0.87983 | N.C.    | N.C.     |
| HLA-DMA    | < 0.00001 | -0.98320 | 0.04402 | -0.73121 | 0.00325 | -0.88025 | 0.00087 | -0.88660 | 0.04493 | -0.72839 | 0.03711 | -0.74290 |
| ZCCHC2     | 0.00136   | -0.87124 | 0.02525 | -0.79797 | 0.02341 | -0.77913 | 0.00073 | -0.89188 | N.C.    | N.C.     | N.C.    | N.C.     |
| HLA-DPB1   | 0.00003   | -0.95604 | 0.02920 | -0.77853 | 0.01193 | -0.82217 | 0.00047 | -0.90400 | N.C.    | N.C.     | 0.00897 | -0.83729 |
| POU2F2     | 0.00001   | -0.97117 | 0.02949 | -0.77701 | 0.00824 | -0.84114 | 0.00101 | -0.88157 | N.C.    | N.C.     | 0.04938 | -0.71743 |
| MANBA      | 0.00001   | -0.97376 | 0.04497 | -0.72825 | 0.00258 | -0.88840 | 0.00070 | -0.89301 | N.C.    | N.C.     | N.C.    | N.C.     |
| MARCKSL1   | 0.00209   | -0.85316 | 0.02711 | -0.78811 | 0.01844 | -0.79633 | 0.00657 | -0.79525 | N.C.    | N.C.     | N.C.    | N.C.     |
| ZNF274     | 0.00004   | -0.95180 | 0.02838 | -0.78189 | 0.02754 | -0.76753 | 0.00034 | -0.91271 | 0.04003 | -0.74088 | N.C.    | N.C.     |
| ZSCAN18    | 0.00024   | -0.92085 | 0.02022 | -0.82221 | 0.00671 | -0.85129 | 0.00413 | -0.81990 | N.C.    | N.C.     | N.C.    | N.C.     |
| CLCN6      | 0.00003   | -0.95965 | N.C.    | N.C.     | 0.00228 | -0.89290 | 0.00230 | -0.84919 | N.C.    | N.C.     | 0.04000 | -0.73583 |
| DGKA       | 0.00004   | -0.95170 | 0.02586 | -0.79495 | 0.00260 | -0.88810 | 0.00155 | -0.86610 | 0.03812 | -0.74821 | N.C.    | N.C.     |
| ARHGAP9    | 0.00030   | -0.91549 | 0.02711 | -0.78880 | 0.02017 | -0.79026 | 0.00494 | -0.81067 | N.C.    | N.C.     | 0.00900 | -0.83704 |
| MYH3       | 0.00124   | -0.87472 | N.C.    | N.C.     | 0.01205 | -0.82156 | 0.00025 | -0.91911 | N.C.    | N.C.     | N.C.    | N.C.     |
| ZNF548     | 0.00015   | -0.93004 | N.C.    | N.C.     | 0.02249 | -0.78259 | 0.00138 | -0.87077 | N.C.    | N.C.     | N.C.    | N.C.     |
| HLA-DRB5   | 0.00005   | -0.95127 | 0.03104 | -0.77126 | 0.04305 | -0.72942 | 0.00028 | -0.91695 | N.C.    | N.C.     | 0.03768 | -0.74140 |
| TRAK1      | 0.00001   | -0.96628 | N.C.    | N.C.     | 0.00208 | -0.89554 | 0.00055 | -0.89996 | N.C.    | N.C.     | 0.04202 | -0.73167 |
| NUP88      | 0.00005   | -0.95109 | 0.03068 | -0.77312 | N.C.    | N.C.     | 0.00089 | -0.88571 | N.C.    | N.C.     | N.C.    | N.C.     |
| STK17A     | 0.00040   | -0.90841 | N.C.    | N.C.     | 0.01116 | -0.82600 | 0.00136 | -0.87129 | N.C.    | N.C.     | N.C.    | N.C.     |
| KIAA2018   | 0.00139   | -0.87040 | N.C.    | N.C.     | N.C.    | N.C.     | 0.00111 | -0.87817 | 0.03497 | -0.75922 | N.C.    | N.C.     |
| ZNF395     | 0.00004   | -0.95499 | 0.04049 | -0.73955 | 0.00824 | -0.84116 | 0.00063 | -0.89589 | N.C.    | N.C.     | N.C.    | N.C.     |
| PLEKHA2    | 0.00001   | -0.96699 | 0.04782 | -0.72157 | 0.01318 | -0.81659 | 0.00004 | -0.95492 | 0.03265 | -0.76648 | N.C.    | N.C.     |
| SCAF4      | 0.00009   | -0.93894 | N.C.    | N.C.     | 0.00942 | -0.83443 | 0.00027 | -0.91728 | N.C.    | N.C.     | N.C.    | N.C.     |
| SNX2       | 0.00025   | -0.91907 | N.C.    | N.C.     | 0.00816 | -0.84171 | 0.00029 | -0.91614 | N.C.    | N.C.     | N.C.    | N.C.     |
| PLEKHF2    | 0.00068   | -0.89384 | 0.04444 | -0.72955 | 0.02193 | -0.78419 | 0.00130 | -0.87289 | N.C.    | N.C.     | N.C.    | N.C.     |
| OC10050671 | 0.00002   | -0.96240 | 0.03139 | -0.76994 | 0.00908 | -0.83654 | 0.00073 | -0.89198 | 0.01954 | -0.82495 | N.C.    | N.C.     |

|          |           |          |         |          |         |          |         |          |         |          |         |          |
|----------|-----------|----------|---------|----------|---------|----------|---------|----------|---------|----------|---------|----------|
| SP110    | 0.00009   | -0.93942 | 0.02949 | -0.77715 | 0.00087 | -0.91955 | 0.00016 | -0.92943 | N.C.    | N.C.     | N.C.    | N.C.     |
| VAMP4    | 0.00189   | -0.85800 | 0.01619 | -0.84646 | 0.02954 | -0.76181 | 0.00160 | -0.86476 | 0.02440 | -0.80282 | N.C.    | N.C.     |
| RALGPS2  | 0.00036   | -0.91092 | N.C.    | N.C.     | 0.00951 | -0.83376 | 0.00006 | -0.94555 | 0.04024 | -0.74031 | N.C.    | N.C.     |
| CLMN     | 0.00153   | -0.86661 | N.C.    | N.C.     | 0.04338 | -0.72855 | 0.00137 | -0.87100 | N.C.    | N.C.     | N.C.    | N.C.     |
| ZBTB24   | 0.00138   | -0.87053 | N.C.    | N.C.     | 0.02180 | -0.78479 | 0.00162 | -0.86437 | N.C.    | N.C.     | N.C.    | N.C.     |
| HGSNAT   | 0.00030   | -0.91517 | N.C.    | N.C.     | 0.01386 | -0.81378 | 0.00202 | -0.85488 | 0.03574 | -0.75710 | N.C.    | N.C.     |
| TLR6     | 0.00117   | -0.87652 | 0.03812 | -0.74842 | 0.01306 | -0.81708 | 0.00040 | -0.90855 | 0.02797 | -0.78382 | 0.01989 | -0.79154 |
| HLA-DRB1 | 0.00002   | -0.96042 | 0.03441 | -0.76081 | 0.03142 | -0.75637 | 0.00012 | -0.93419 | N.C.    | N.C.     | 0.01993 | -0.79129 |
| ZNF493   | 0.00031   | -0.91443 | 0.04638 | -0.72434 | 0.00700 | -0.84935 | 0.00087 | -0.88635 | N.C.    | N.C.     | N.C.    | N.C.     |
| CEP135   | 0.00135   | -0.87157 | 0.02805 | -0.78348 | 0.00530 | -0.86204 | 0.00014 | -0.93192 | N.C.    | N.C.     | N.C.    | N.C.     |
| SERPIN9  | < 0.00001 | 0.99183  | N.C.    | N.C.     | 0.00037 | -0.94158 | 0.00284 | -0.83921 | N.C.    | N.C.     | 0.03488 | -0.74793 |
| PLXNA3   | 0.00153   | -0.86647 | N.C.    | N.C.     | 0.01084 | -0.82740 | 0.00659 | -0.79502 | N.C.    | N.C.     | N.C.    | N.C.     |
| ZNF512   | 0.00003   | -0.95743 | N.C.    | N.C.     | 0.02011 | -0.79048 | 0.00030 | -0.91537 | 0.03669 | -0.75234 | N.C.    | N.C.     |
| PAN3     | 0.00047   | -0.90403 | N.C.    | N.C.     | 0.00081 | -0.92233 | 0.00111 | -0.87821 | N.C.    | N.C.     | N.C.    | N.C.     |
| TMC8     | 0.00006   | -0.94751 | 0.01686 | -0.83661 | 0.00085 | -0.92065 | 0.00245 | -0.84634 | N.C.    | N.C.     | 0.04382 | -0.72761 |
| CD19     | 0.00003   | -0.95778 | 0.02324 | -0.80744 | 0.00142 | -0.90627 | 0.00138 | -0.87065 | N.C.    | N.C.     | N.C.    | N.C.     |
| ZC3H12D  | 0.00049   | -0.90273 | 0.03841 | -0.74696 | 0.04460 | -0.72599 | 0.00344 | -0.82913 | N.C.    | N.C.     | N.C.    | N.C.     |
| MSL3     | 0.00005   | -0.94905 | N.C.    | N.C.     | 0.01421 | -0.81259 | 0.00198 | -0.85583 | N.C.    | N.C.     | N.C.    | N.C.     |
| HERC4    | 0.00106   | -0.87981 | N.C.    | N.C.     | N.C.    | N.C.     | 0.00025 | -0.91981 | N.C.    | N.C.     | N.C.    | N.C.     |
| RSBN1    | 0.00534   | -0.80650 | 0.00962 | -0.88710 | 0.03713 | -0.74262 | 0.01369 | -0.75006 | 0.02658 | -0.79127 | N.C.    | N.C.     |
| KRI1     | 0.00005   | -0.94891 | 0.03265 | -0.76628 | 0.01853 | -0.79598 | 0.00198 | -0.85574 | N.C.    | N.C.     | 0.01048 | -0.82906 |
| FAM160B2 | 0.00035   | -0.91136 | 0.02699 | -0.78975 | 0.01978 | -0.79203 | 0.00422 | -0.81887 | N.C.    | N.C.     | N.C.    | N.C.     |
| RNF146   | 0.00300   | -0.83638 | 0.04515 | -0.72785 | 0.03077 | -0.75865 | 0.01525 | -0.74249 | N.C.    | N.C.     | N.C.    | N.C.     |
| ITSN2    | 0.00086   | -0.88701 | N.C.    | N.C.     | 0.00091 | -0.91820 | 0.00022 | -0.92265 | N.C.    | N.C.     | 0.03353 | -0.75168 |
| MBTD1    | 0.00219   | -0.85154 | N.C.    | N.C.     | 0.03820 | -0.74026 | 0.00109 | -0.87903 | 0.01881 | -0.82737 | N.C.    | N.C.     |
| SMC6     | 0.00039   | -0.90930 | N.C.    | N.C.     | 0.00237 | -0.89127 | 0.00004 | -0.95402 | N.C.    | N.C.     | N.C.    | N.C.     |
| RLTPR    | 0.00012   | -0.93424 | 0.03357 | -0.76394 | 0.00306 | -0.88306 | 0.00219 | -0.85157 | N.C.    | N.C.     | 0.04283 | -0.72990 |
| ZNF418   | 0.00715   | -0.79054 | N.C.    | N.C.     | 0.00060 | -0.92926 | 0.02285 | -0.71197 | 0.03887 | -0.74476 | 0.02047 | -0.78935 |
| KIAA0430 | 0.00033   | -0.91281 | N.C.    | N.C.     | 0.00411 | -0.87203 | 0.00090 | -0.88535 | 0.02949 | -0.77728 | N.C.    | N.C.     |
| ZBED5    | 0.00057   | -0.89865 | 0.02217 | -0.81183 | 0.03311 | -0.75262 | 0.00328 | -0.83160 | N.C.    | N.C.     | N.C.    | N.C.     |
| GA2      | < 0.00001 | -0.98428 | 0.03842 | -0.74668 | 0.00125 | -0.91001 | 0.00026 | -0.91816 | N.C.    | N.C.     | N.C.    | N.C.     |
| CHML     | 0.00099   | -0.88213 | 0.03887 | -0.74536 | 0.00595 | -0.85688 | 0.00081 | -0.88865 | 0.02711 | -0.78821 | N.C.    | N.C.     |
| KIAA1033 | 0.00308   | -0.83498 | N.C.    | N.C.     | 0.00315 | -0.88145 | 0.00298 | -0.83688 | 0.04295 | -0.73387 | N.C.    | N.C.     |
| ZNF821   | 0.00100   | -0.88183 | N.C.    | N.C.     | 0.00164 | -0.90230 | 0.01158 | -0.76122 | N.C.    | N.C.     | N.C.    | N.C.     |
| PRDM2    | 0.00051   | -0.90188 | 0.04970 | -0.71757 | 0.00959 | -0.83330 | 0.00022 | -0.92262 | 0.02586 | -0.79469 | N.C.    | N.C.     |
| USPL1    | 0.00014   | -0.93120 | N.C.    | N.C.     | 0.01018 | -0.83036 | 0.00027 | -0.91766 | N.C.    | N.C.     | N.C.    | N.C.     |
| SMAD4    | 0.00022   | -0.92307 | N.C.    | N.C.     | 0.00965 | -0.83297 | 0.00253 | -0.84487 | N.C.    | N.C.     | N.C.    | N.C.     |
| IKKB     | 0.00030   | -0.91527 | N.C.    | N.C.     | 0.01205 | -0.82153 | 0.00414 | -0.81981 | 0.03992 | -0.74160 | 0.01995 | -0.79109 |
| WDR11    | 0.00121   | -0.87538 | N.C.    | N.C.     | 0.00266 | -0.88748 | 0.00028 | -0.91651 | 0.03620 | -0.75588 | N.C.    | N.C.     |
| HERC3    | 0.00638   | -0.79672 | N.C.    | N.C.     | 0.01262 | -0.81904 | 0.01329 | -0.75213 | N.C.    | N.C.     | N.C.    | N.C.     |
| TAF4     | 0.00269   | -0.84185 | N.C.    | N.C.     | 0.00085 | -0.92091 | 0.00330 | -0.83135 | N.C.    | N.C.     | N.C.    | N.C.     |
| TRIO     | 0.01233   | -0.75713 | N.C.    | N.C.     | 0.00460 | -0.86712 | 0.01507 | -0.74331 | N.C.    | N.C.     | N.C.    | N.C.     |
| HNRPDL   | 0.00016   | -0.92843 | 0.02725 | -0.78746 | 0.01827 | -0.79696 | 0.00144 | -0.86913 | 0.04812 | -0.72089 | N.C.    | N.C.     |
| ZNF783   | 0.00001   | -0.96982 | N.C.    | N.C.     | 0.01428 | -0.81222 | 0.00024 | -0.92068 | N.C.    | N.C.     | 0.02390 | -0.77776 |
| MBNL3    | 0.00036   | -0.91080 | N.C.    | N.C.     | 0.00421 | -0.87093 | 0.00062 | -0.89668 | N.C.    | N.C.     | N.C.    | N.C.     |
| NXF1     | 0.00061   | -0.89712 | 0.02994 | -0.77494 | 0.03310 | -0.75279 | 0.00358 | -0.82740 | N.C.    | N.C.     | N.C.    | N.C.     |
| CBFA2T2  | 0.00011   | -0.93571 | N.C.    | N.C.     | 0.00041 | -0.93765 | 0.00020 | -0.92458 | N.C.    | N.C.     | N.C.    | N.C.     |
| PCF11    | 0.00005   | -0.95071 | N.C.    | N.C.     | 0.00126 | -0.90980 | 0.00049 | -0.90290 | N.C.    | N.C.     | N.C.    | N.C.     |
| FAM111A  | 0.00022   | -0.92287 | N.C.    | N.C.     | 0.02552 | -0.77315 | 0.00259 | -0.84369 | N.C.    | N.C.     | N.C.    | N.C.     |
| TIA1     | 0.00410   | -0.82037 | N.C.    | N.C.     | 0.02557 | -0.77284 | 0.00849 | -0.78026 | N.C.    | N.C.     | N.C.    | N.C.     |
| CDCA7L   | 0.00029   | -0.91636 | N.C.    | N.C.     | 0.00232 | -0.89227 | 0.00236 | -0.84808 | N.C.    | N.C.     | 0.04408 | -0.72707 |
| NUFIP2   | 0.00106   | -0.87984 | 0.01934 | -0.82562 | 0.01499 | -0.80940 | 0.00147 | -0.86812 | 0.03441 | -0.76082 | N.C.    | N.C.     |
| KCTD7    | 0.00063   | -0.89621 | 0.02793 | -0.78408 | 0.02495 | -0.77506 | 0.00139 | -0.87034 | 0.02270 | -0.80966 | N.C.    | N.C.     |
| ZSWIM7   | 0.01549   | -0.74126 | 0.03425 | -0.76159 | 0.01901 | -0.79455 | 0.02237 | -0.71368 | 0.04256 | -0.73455 | N.C.    | N.C.     |
| C1orf63  | 0.00035   | -0.91177 | N.C.    | N.C.     | 0.03711 | -0.74283 | 0.00715 | -0.79050 | N.C.    | N.C.     | N.C.    | N.C.     |
| CCDC76   | 0.00841   | -0.78078 | 0.04528 | -0.72743 | 0.02609 | -0.77127 | 0.03878 | -0.65979 | 0.03687 | -0.75197 | N.C.    | N.C.     |
| NR2C2    | 0.00013   | -0.93287 | 0.04296 | -0.73379 | 0.00700 | -0.84939 | 0.00115 | -0.87691 | 0.03887 | -0.74471 | N.C.    | N.C.     |
| RYK      | 0.00151   | -0.86707 | 0.03812 | -0.74798 | 0.01206 | -0.82127 | 0.01270 | -0.75517 | N.C.    | N.C.     | N.C.    | N.C.     |
| PAN2     | 0.00024   | -0.92021 | N.C.    | N.C.     | 0.04381 | -0.72770 | 0.00270 | -0.84166 | N.C.    | N.C.     | N.C.    | N.C.     |
| SNX1     | 0.00004   | -0.95176 | 0.02449 | -0.80211 | 0.01668 | -0.80239 | 0.00021 | -0.92340 | 0.01692 | -0.83628 | N.C.    | N.C.     |
| PCMTD2   | 0.00005   | -0.94931 | N.C.    | N.C.     | 0.03095 | -0.75788 | 0.00015 | -0.93068 | N.C.    | N.C.     | N.C.    | N.C.     |
| FCHSD2   | 0.00045   | -0.90507 | N.C.    | N.C.     | 0.02196 | -0.78399 | 0.00008 | -0.94124 | 0.04575 | -0.72644 | N.C.    | N.C.     |
| ATG12    | 0.00174   | -0.86157 | 0.04867 | -0.71952 | 0.01561 | -0.80698 | 0.00112 | -0.87779 | N.C.    | N.C.     | N.C.    | N.C.     |
| PBX2     | 0.00026   | -0.91869 | 0.02994 | -0.77490 | 0.00291 | -0.88457 | 0.00168 | -0.86290 | 0.03886 | -0.74570 | 0.03356 | -0.75155 |
| ASB1     | 0.00197   | -0.85604 | 0.03834 | -0.74731 | 0.01279 | -0.81823 | 0.00491 | -0.81091 | 0.03767 | -0.74971 | N.C.    | N.C.     |
| PHKA2    | 0.00904   | -0.77667 | N.C.    | N.C.     | 0.00041 | -0.93826 | 0.03317 | -0.67616 | N.C.    | N.C.     | N.C.    | N.C.     |
| RERE     | 0.00044   | -0.90594 | 0.03653 | -0.75393 | 0.00347 | -0.87785 | 0.00514 | -0.80851 | N.C.    | N.C.     | N.C.    | N.C.     |
| MPHOSPH8 | 0.00010   | -0.93730 | 0.03114 | -0.77079 | 0.04338 | -0.72855 | 0.00036 | -0.91131 | 0.04431 | -0.73033 | N.C.    | N.C.     |
| NUP160   | 0.00308   | -0.83489 | N.C.    | N.C.     | 0.00421 | -0.87080 | 0.01016 | -0.76939 | N.C.    | N.C.     | N.C.    | N.C.     |
| KIAA1731 | 0.03844   | -0.66064 | 0.03834 | -0.74737 | 0.00734 | -0.84702 | 0.01293 | -0.75405 | N.C.    | N.C.     | N.C.    | N.C.     |
| HDAC1    | 0.00229   | -0.84947 | 0.01032 | -0.88378 | 0.00407 | -0.87239 | 0.01170 | -0.76054 | N.C.    | N.C.     | N.C.    | N.C.     |
| NAA25    | 0.00774   | -0.78568 | N.C.    | N.C.     | 0.00907 | -0.83668 | 0.01343 | -0.75137 | N.C.    | N.C.     | N.C.    | N.C.     |

*Supplementary Table S7. Functional Gene Enrichment Analysis.* The top 30 categories are shown for GO Terms and Pathway Analyses along with the number of genes in the category. The p-values were derived from the EASE score probability 'P Value', and a modified Fisher's exact test that is more conservative than the standard Fisher's exact test. Ten of the top 30 categories describe genes involved in endoplasmic reticulum development, protein production, transport, or degradation. This is consistent with the large increases in immunoglobulin production machinery seen in differentiating plasma cells.

|                        | <u>Term</u>                                                          | <u># Genes</u> | <u>p-value</u> | <u>Adj. p-value</u> |
|------------------------|----------------------------------------------------------------------|----------------|----------------|---------------------|
| The top 30 categories: | GO:0005783~endoplasmic reticulum                                     | 155            | 7.07E-49       | 3.01E-46            |
| GOTERM_CC_ALL          | GO:0044444~cytoplasmic part                                          | 374            | 1.60E-45       | 3.54E-43            |
| GOTERM_CC_FAT          | GO:0044432~endoplasmic reticulum part                                | 84             | 9.98E-39       | 2.13E-36            |
| GOTERM_CC_ALL          | GO:0005737~cytoplasm                                                 | 457            | 1.23E-35       | 1.36E-33            |
| GOTERM_CC_FAT          | GO:0031090~organelle membrane                                        | 129            | 6.53E-26       | 9.27E-24            |
| GOTERM_CC_FAT          | GO:0042175~nuclear envelope-endoplasmic reticulum network            | 59             | 2.06E-23       | 2.19E-21            |
| GOTERM_CC_FAT          | GO:0005789~endoplasmic reticulum membrane                            | 57             | 4.61E-23       | 3.93E-21            |
| REACTOME_PATHWAY       | REACT_15380:Diabetes pathways                                        | 62             | 2.06E-22       | 1.13E-20            |
| GOTERM_CC_ALL          | GO:0043231~intracellular membrane-bounded organelle                  | 449            | 3.78E-22       | 1.87E-20            |
| GOTERM_CC_ALL          | GO:0043227~membrane-bounded organelle                                | 449            | 4.71E-22       | 2.09E-20            |
| GOTERM_CC_FAT          | GO:0012505~endomembrane system                                       | 97             | 8.07E-21       | 5.73E-19            |
| GOTERM_CC_ALL          | GO:0044424~intracellular part                                        | 537            | 1.38E-18       | 5.57E-17            |
| GOTERM_CC_ALL          | GO:0005622~intracellular                                             | 545            | 1.85E-16       | 7.55E-15            |
| GOTERM_CC_FAT          | GO:0005788~endoplasmic reticulum lumen                               | 27             | 2.46E-16       | 1.35E-14            |
| GOTERM_CC_ALL          | GO:0043229~intracellular organelle                                   | 469            | 6.79E-16       | 1.84E-14            |
| GOTERM_CC_ALL          | GO:0043226~organelle                                                 | 469            | 9.17E-16       | 2.32E-14            |
| GOTERM_CC_FAT          | GO:0005793~ER-Golgi intermediate compartment                         | 20             | 1.35E-15       | 7.09E-14            |
| GOTERM_CC_FAT          | GO:0005794~Golgi apparatus                                           | 91             | 1.40E-14       | 6.62E-13            |
| GOTERM_CC_ALL          | GO:0016020~membrane                                                  | 389            | 1.09E-12       | 2.69E-11            |
| GOTERM_BP_FAT          | GO:0034976~response to endoplasmic reticulum stress                  | 16             | 1.44E-12       | 3.74E-09            |
| GOTERM_BP_FAT          | GO:0046907~intracellular transport                                   | 69             | 2.32E-12       | 3.00E-09            |
| KEGG_PATHWAY           | hsa00510:N-Glycan biosynthesis                                       | 19             | 2.32E-12       | 3.78E-10            |
| GOTERM_CC_ALL          | GO:0044464~cell part                                                 | 649            | 3.37E-12       | 7.88E-11            |
| GOTERM_CC_ALL          | GO:0005623~cell                                                      | 649            | 3.50E-12       | 7.77E-11            |
| GOTERM_BP_FAT          | GO:0015031~protein transport                                         | 75             | 5.22E-12       | 4.51E-09            |
| GOTERM_BP_FAT          | GO:0045184~establishment of protein localization                     | 75             | 8.32E-12       | 5.39E-09            |
| GOTERM_BP_FAT          | GO:0008104~protein localization                                      | 80             | 5.45E-11       | 2.82E-08            |
| GOTERM_BP_FAT          | GO:0010498~proteasomal protein catabolic process                     | 23             | 1.48E-10       | 6.41E-08            |
| GOTERM_BP_FAT          | GO:0043161~proteasomal ubiquitin-dependent protein catabolic process | 23             | 1.48E-10       | 6.41E-08            |



|     |          |           |          |          |          |           |          |          |          |          |          |          |          |          |            |         |          |          |           |            |     |
|-----|----------|-----------|----------|----------|----------|-----------|----------|----------|----------|----------|----------|----------|----------|----------|------------|---------|----------|----------|-----------|------------|-----|
| 114 | HLA-DMB  | TBC1D4    | AP1S2    | RORA     | AHR      | SVIP      | CD33     | PIM3     | ANXA5    | TULP4    | LIME1    | MDTH     | PSMB10   | MYL12B   | ZBTB7B     | SUB1    | FYKBP1A  | IRF3     | AT1C      | NID1       |     |
| 115 | PLEK     | RPL36     | ANXA2    | PLXND1   | MARCKS   | CDC14B    | FLN11    | RG53     | TNIP2    | HEL6     | ATP13A1  | PCGF5    | SEPN1    | SLC9A3R1 | PYHIN1     | ROD1    | YVHAE    | TNFRSF25 | OXCT1     | NOD2       |     |
| 116 | FGD2     | TRIB2     | GNS      | MEGFB    | MAPKAPK3 | NOL7      | HECTD1   | SLC2A1   | COX6C    | TMOD2    | TMEM8A   | POLR2B   | ADAMTSL4 | FAM190B  | FBXW5      | NR1D2   | 1-Mar    | FAM117A  | DNMT3C    | DPYD       |     |
| 117 | EHPB1L   | FAM46C    | EPST11   | FAM107B  | LILRB3   | SRLTB     | SNX30    | RDBP     | NDUFBR   | SEC23IP  | UBA1     | STOM     | C15orf39 | CMKP1    | C1orf21    | TNFAIP8 | 1-Mar    | ANKZF1   | ZDHHC2    | FOSL2      |     |
| 118 | ALOX5    | TP53INP1  | ANAPC5   | GOLGA8B  | LGALS9   | METTL4    | ZSWIM6   | LXN1     | SIRPB2   | SNX2     | CPSP1    | STK17A   | PLC82    | ATRX     | UBXN11     | SEC63   | CAMK2    | TPSYL2   | TCOF1     | LAC3       |     |
| 119 | JK2      | TRAF3IP3  | YVHAE    | HIP1R    | QSOX72   | LILVB     | UGGT1    | NCR3     | GLTSCR2  | ZM1Z1    | UPF1     | LSM14A   | WAS      | XRCC5    | PNK1       | CEP57   | STX11    | THEM4    | FBXW4     | SLC24A4    |     |
| 120 | NP2C     | PIM2      | SSR4     | GATA2B   | CIITA    | GCNT4     | YJUBA1A  | IL32     | CEP192   | IQSEC1   | CLN7     | PRKACB   | DEF8     | CAB39    | KIAA0467   | MYL12A  | SORT1    | ITL1     | SLC39A8   | KLHL14     |     |
| 121 | FCER1G   | STAT5B    | CREC1    | ICD3     | CA9F52   | CD45      | OBSGN    | NOJF53   | DS1      | CEP192   | CLN7     | ZEB44    | PML2A    | PNPLA2   | KIAA0930   | RS124D1 | JK2      | GRASP1   | FLJ1306   | TRAF5      |     |
| 122 | OKI      | BCL11B    | ZDHHC20  | RPL36    | HLA-DMA  | CPA33     | SSFA2    | MZT2B    | INPP5K   | C13orf23 | INPPL1   | CPD      | LNF8     | ARHGFE3  | TRV2       | EPRS    | IFNGR2   | ARHGAP15 | TRAF5     | RAB2A      |     |
| 123 | SH2B3    | SLC7A6    | RPL24    | TNRC18   | SLC43A2  | C9orf10   | CHD1     | PLEKHF1  | ZER1     | HMOXB1   | SETD1B   | AZIN1    | WDR81    | RPS13    | ELL        | SEC62   | PRKACA   | GZMK     | ZNF830    | ZNF156     |     |
| 124 | ZEB2     | BCL9L     | APLP2    | CBX7     | PEA15    | PLCL1     | FOXN2    | BSG      | URM1     | TBC109   | RNH1     | RAB27A   | TUFM     | SPCS3    | DEF6       | ARPC2   | DAFK1    | TMOM7    | LRTRP     | RNF144B    |     |
| 125 | PICALM   | RPL12     | RPL37    | ARRB1    | NAGK     | UNG       | P2RX7    | C5orf39  | PIPF     | ZFH3X    | BTBD2    | LDDHA    | COPE     | CSD51    | RAB27A     | SF3A3   | TCPO     | KIAA0748 | KIF21A    | CD151      |     |
| 126 | TIMP2    | CD5       | PLSCR1   | DOPEY2   | GNB4     | ZOCHC17   | GLUD1    | SEPX1    | SLC2A1   | ZC3H7A   | LMF2     | NDIFP1   | KIAA0467 | GPBP1    | ZYX        | CALM2   | FCGR1    | FLT3LG   | PHF1      | GCH1       |     |
| 127 | PTPRP    | RPL35     | AGPAT3   | ITK      | LILRB1   | DSC1      | UBR5     | LOC93622 | TBC1D10A | LX4      | HGS      | BT3      | USP130   | PDIA3    | CPD        | MTDH    | KLF4     | ZNF83    | ANK3      | COTL1      |     |
| 128 | GIMAP8   | ITGA6     | FND3C8   | EVL      | NUDT16   | PLAG1     | SLC25A24 | GIPC1    | TLR4     | MS4A2    | SFPB3    | SFB1     | SBF1     | MAT2B    | USD2       | ARL6IP5 | CYFIP1   | RPL36AL  | PEBP1     | S100A12    |     |
| 129 | RAB31    | RPSA      | LGALS9   | VASP     | JUP      | NGFRAP1   | C12orf51 | SNHG8    | KLK21    | AGF61    | PSMB10   | PCNP     | CORO1B   | MSL2     | DOK2       | SSB     | CLEC2A2  | SH3YL1   | LRI1      | MDN1       |     |
| 130 | RNF130   | HSPA5     | EPRS     | YSK      | ARHGAP26 | RASGRP3   | BDP1     | NR1H2    | PNK2     | EPCC2    | SUPT5H   | CD2      | SYNGR2   | UOCRB    | DDX60      | TMED2   | LIL2RA2  | GRAMD1A  | LRB1      | LHFPL2     |     |
| 131 | PKRCD    | RASGRP1   | FKBP11   | FOXO1    | KLK4     | NMRAL1    | AF4      | URM1     | COASY    | ZBED6    | ANXA11   | KLRF1    | SUPT5H   | TAX1BP1  | ST3GAL2    | VBP1    | NDST1    | LRI1     | GRASP1    | OSBP10     |     |
| 132 | PTAFR    | ESYT2     | MAGT1    | FAM65A   | DAPK1    | C12orf29  | RUNX1    | SRRP1    | CDCD115  | UBR1     | PRR12    | SUB1     | MINK1    | SUB1     | ELF1       | ATP5H   | GLGALS1  | GASS     | SH2D3A    | PRAM1      |     |
| 133 | VASP     | RASA3     | GCH1     | PPM1F    | SCARB2   | FBXO32    | ATP6V0D1 | NDD116L1 | SRGAP2   | APC      | SYNGR2   | EID1     | PPP6R1   | TA7F     | WUP24      | CAPT    | SIRPB1   | FOXO1    | OICAD2    | PPARGC1B   |     |
| 134 | NADK     | GOLGA8B   | RFP513   | FCGR2    | SLC24A4  | GALNT12   | PNKD     | MARF13   | PLEKHF1  | CEP290   | SIN3B    | NUCK1F   | HDC65    | NAA50    | WNP24      | WAPAL   | APAF1    | FCGBP    | C11orf68  | MAP3K8     |     |
| 135 | SIRPA    | SMI1      | IMPAD1   | PLACL2   | FLAC2    | LDN15     | ADAM9    | INPKC    | AT7      | ATP11    | TKIP1    | HK1      | RFT1     | TRF5H    | TNFR3A1    | TRAF1   | TRAF1    | TRF5H    | TRF5H     | MAP3K8     |     |
| 136 | MEFV     | OBSGN     | ISG20    | ABR      | SLC20A1  | ADOF2     | CDK12    | PAICS    | ADCK3    | RAPGEF2  | CAMTA2   | CAB39    | ALDH3B1  | CD69     | MYO18A     | PPR6C   | ATP8A1   | BCR      | OBSGN     | EMILIN2    |     |
| 137 | SYK      | PRKCH     | NP2C     | S11      | SEMA4A   | ZNF815    | BMPR2    | CDCD115  | SH2D2A   | KIAA1432 | USP20    | UBO2     | SYMPK    | PDSA     | GZMM       | STK17B  | LAP3     | SETD1A   | GRINA     | TNXC5      |     |
| 138 | GRINA    | KIF21B    | CTSZ     | LIMK2    | MAFB     | CDC65     | BRWD1    | EAPP     | IER2     | CHORDC1  | SOLH     | MAT2B    | MAP3K11  | C1orf21  | SH2D1B     | NR1P1   | GRINA    | DNMT3A   | KIAA0748  | NACK       |     |
| 139 | LGALS9   | PEDE7A    | ALDH1A1  | SATB1    | PILRA    | NLGN2     | FAM91A1  | GCEIT2   | RPS19B1  | PAG9     | DOK2     | YVHAW2   | TRMT1    | RPL6     | TGFRB1     | TRAM1   | DOK3     | PPR39    | TNFRSF25  | CYFIP1     |     |
| 140 | SORT1    | MZB1      | APTL2    | ADARB1   | DOK3     | TIMM9     | APC      | CIAPIN1  | NUDT16L1 | ATP1D0   | WDR81    | EPRS     | CSNK1G2  | ELF1     | SLC25A11   | XPOT    | GSN      | PRY10    | HINT1     | GCNT1      |     |
| 141 | KIAA0513 | SLC44A2   | SPTLC1   | SOLC2    | S100A9   | CNDP2     | C17orf48 | RIN2     | OAZ2     | LIMK2    | TE3      | ULR1     | LRB      | PKD1     | S13KBP1    | PPP6R2  | XGAT2    | PILRA    | LOC728743 | ZNF559     | GSN |
| 142 | SCPEP1   | FAM107B   | PT71     | LRR25    | HMOX1    | BDH2      | LHFPL2   | NMRAL1   | FADS2    | MOBK1A1  | COPE     | RPL22    | TNS3     | MTDH     | SYT11      | ARPC3   | ALDH2    | CEP120   | SH3YL1    | SF1        |     |
| 143 | EMR2     | TT3       | CC3      | PP2A     | WFC5     | YSL3      | SLC20A2  | TMOD2    | ALKH6    | RELA     | TMEM170B | STXB2    | MYL12B   | RREB1    | SH2D1A     | MGRN1   | SPCS3    | MYOF     | OSBP10    | SEPHS1     | JP2 |
| 144 | ZNF385A  | CD2       | KDELRL2  | FCHD2    | BTX      | SARDH     | PRR14L   | NDUF88   | C7orf26  | MPHOSPH9 | APOBR    | NAASO    | TBC1D9B  | BT3      | BRAT1      | YVHAW2  | CD33     | MYO19    | CFP       | PLIN3      |     |
| 145 | ADRBK2   | IGHA1     | RPL36AL  | IGER     | NOD2     | C17orf28  | PTPLAD2  | ANKRD28  | A3orf2   | KIF3B    | PANL2    | TGFB1R1  | ALDH16A1 | TGFB1R1  | ATP13A3    | CNOT8   | CD63     | USP39    | LILRA5    | SNX10      |     |
| 146 | CAST     | PSD4      | RPS27A   | PICALM   | LILRA1   | ZNF585A   | AT7      | CBX5     | DDRK1G   | ZNF621   | PPDFP    | PLC2     | FAM160B2 | NAP1L1   | PIPSK1C    | ZMYND11 | OAS1     | CD38     | PGD       | MLL        |     |
| 147 | MAFB     | NELL2     | HIAT1    | CYP11B1  | SIRPB2   | CASP6     | ZFH3X    | ABC1F    | TMEM203  | SNX30    | TECPR1   | TMED2    | MAP2K7   | KLRG1    | SDF4       | FXR1    | FAM49A   | TCO1F    | FBX1L6    | FAM1298    |     |
| 148 | MAN2B1   | TC2N      | DENNDSB  | SRSF5    | DAPP1    | ZC4H2     | ZFC3H1   | TMEM161A | BST1     | ROCK2    | MAN2C1   | SMARCA5  | RNF44    | RBMX     | CORO1B     | SERP1   | G6PD     | DENNDSB  | ZNF385A   | ANKRD35    |     |
| 149 | ALDH2    | SATB1     | CTSA     | UBTF     | KDM1B    | TMEM14A   | KIAA0368 | RPS19B1  | TNFRSF8  | LCOR     | NLN1     | ANP32E   | RANF10   | ZBTB1    | KDM6B      | ANP32E  | GAA      | SNED1    | AK5       | RNF146     |     |
| 150 | ACAM1    | SN2       | ADNS     | CYFIP1   | ADAM9    | CD100189A | RAB9A    | 1-Sep    | MPC2     | TNIP1    | FOXQ3    | ARFIP4   | ARFIP4   | ARFIP4   | ARFIP4     | ARFIP4  | ARFIP4   | ARFIP4   | ARFIP4    | ARFIP4     |     |
| 151 | MAGT1    | TPFR3     | BS12     | PAN2     | TBXAS1   | MPF6      | MOBK1A1  | FRG1     | LY86     | ADRBK2   | C9orf86  | ACGF1    | ARFGAP1  | KTN1     | FAM49B     | ATP2A1  | MPF1     | CXCL6    | PLCJ1     | NLRP12     |     |
| 152 | CASP1    | KLIF2     | LAMC1    | ABHD2    | CD33     | SELM      | SMCS     | DDRK1G   | POLR3JK  | ZFYVE16  | ATG2A    | PTN22    | SPN51    | SEC62    | MAP3K11    | DARS    | CYBRD1   | TODG     | LKNG      | ATRP2      |     |
| 153 | CD163    | TBC1D10C  | PARP1    | TE12     | RCTB2    | H2AFY2    | KIF13B   | C8orf55  | MPND     | USP53    | KIAA0467 | UFM1     | AGAP3    | SYNCRIP  | KIAA0913   | GOLPH3  | ADRBK2   | ABHD14B  | TSHZ2     | CSTA       |     |
| 154 | OAS3     | ARGLU1    | EPF1     | CPPEP1   | OSCAR    | FAM159A   | C19orf59 | COX6C    | TMEM0    | ANKRD36  | ZNF335   | LPGAT1   | MTMR14   | STK17B   | ARID5A     | SP100   | MAFB     | C1002890 | ACACB     | SLC1A5     |     |
| 155 | NAGA     | PRKACB    | CD93     | SLC38A1  | SLC2A3   | IL23A     | SLC31A1  | MAGEF1   | HMOX2    | DYNC1L2  | ARHGAP1  | PRKCH    | ZNF710   | PTGES3   | CDK17      | SUZ12   | SLC24A4  | ZNF271   | UTP14A    | SRC        |     |
| 156 | ITGAX    | IGHG3     | TMEM124  | FAM102A  | PBX4     | AGPS      | ERLEC1   | CE51     | SLFN12L  | MAN2B2   | RPS25    | NCOR2    | NR1D2    | SCRIB    | CDK6       | FOSL2   | UPO6F1   | VSIG1    | SIGLEC14  | SRGAP1     |     |
| 157 | KIAA0930 | TUBGC6P   | MS4A6A   | ZRANB2   | EPBA1L3  | MYB       | ZFYVE16  | ATRIP    | DNADJ8   | ANTXR2   | SLC12A9  | XPB1     | ATP13A1  | SYT11    | MAPP1      | RAP1A   | LGALS3   | ZNF373   | SMYD5     | SCPEP1     |     |
| 158 | ZDHHC7   | RPS7      | RPSA     | LEF1     | PRKX     | PRKX      | YVHAW2   | ATP13A1  | FRP2     | FLOT2    | EIF5B    | PPP1R9B  | SLC35D1  | FAM129B  | SIGNALNACT | TS2D1   | ITGAV    | ITGAV    | ITGAV     | ITGAV      |     |
| 159 | SLC11A1  | LMAN1     | MANEA    | PAX5     | CD1D     | CDFN      | SESTD1   | KLHL21   | FRG1     | AGPS     | KIAA0415 | KLRB1    | MGRN1    | DDX60    | KLRF1      | FOXN3   | SLC31A2  | ANKRD36  | MUTYH     | HPSE       |     |
| 160 | CLECTA   | EEF1B2    | TMEM176B | ADRBK2   | CD30F16  | NKRDR36BP | PTAR1    | C7orf26  | C19orf59 | CLOCK    | GAA      | FAM190B  | C11orf2  | TRA2B    | LMAN2      | UOCRB   | TREC     | OXCT1    | ZNF420    | DAB2       |     |
| 161 | IFNGR1   | NLR3C     | TPD52    | CASP8    | VAMP3    | PODXL2    | DMX1     | L        | SNGH7    | NMRAL1   | ZNF37A   | SLC4A2   | RAP1A    | SESTD1B  | 7-Mar      | SLC12A9 | UBP1     | S100A12  | ZDHHC2    | B3GALT1    |     |
| 162 | OAS2     | P4H8      | C11orf10 | ANPEP    | LGALS3   | KIAA2022  | ITGAV    | TNIP2    | RIN2     | OGRF1L   | LTPB4    | TAX1BP1  | MATS1    | SMARCA5  | ADAMTSL4   | AIMP1   | SUSD1    | FBXW4    | CCR1      | KIAA0513   |     |
| 163 | ANXA2    | RILRB     | CRISPDL2 | TRAF1    | NDST1    | C1R       | DYNC1L12 | CPX5F    | PRDX5    | TMEM161A | NALP2    | RAVER1   | ARRNP1   | TECPR1   | PTPN22     | PISD    | GPBP1    | EPBA1L3  | GRAP      | PCYT2      |     |
| 164 | LILRA1   | LILRA1P   | RPL31    | DOK3     | FGD3     | 1-Sep     | SPAG9    | PRDX5    | TMEM161A | NALP2    | RAVER1   | ARRNP1   | TECPR1   | PTPN22   | PISD       | GPBP1   | EPBA1L3  | GRAP     | PCYT2     | DC10028919 |     |
| 165 | SNR      | CD247     | DERL3    | TUBGC6P  | CEBPA    | CEBPA     | FLJ97057 | BBC3     | C8orf55  | GAS7     | PPP6R2   | FCGR10P2 | C1C      | RAP1A    | CHMP1A     | CHMP1A  | CHMP1A   | CHMP1A   | CHMP1A    | CHMP1A     |     |
| 166 | CHST15   | DI1005067 | ACSL4    | PRAI1    | ADAMTSL4 | ADAMTSL4  | STX6     | METTL6   | GPLR35   | GOLT1B   | STRN4    | TAB2     | NFKB2    | SKAP1    | IDS        | SKAP1   | IDS      | SKAP1    | IDS       | SKAP1      |     |
| 167 | DPSL2    | HCV025    | DUSP2    | KIAA1033 | LILRA3   | 3-Corf58  | FANCI    | UBOX5    | FC7C34   | TYH43    | HECA     | NDOR1    | ZNF148   | KLRG1    | CEP120     | SNX10   | CNM2D6   | NPDC1    | NCKAP5L   | SESTD1     |     |
| 168 | PLEKH01  | CNCL2     | NAPA     | NELL2    | CLMN     | LY86      | LY75     | SSBP1    | XPO5     | NFKB2    | UGP2     | HDAC10   | SYTL2    | ID2      | EROL1      | NID1    | KOTD7    | FAM84B   | SORT1     | 1-Sep      |     |
| 169 | 1-Mar    | ITPK8     | MGAT1    | VIM      | ARHGFE40 | ALDOA     | PSMB3    | RPS7     | WDFY2    | SDF4     | CCT8     | VAR5     | CAPZA1   | CLCN7    | SMC5       | CEBPA   | SORSB3   | NTSE     | RP2       | 1-Sep      |     |
| 170 | H2AFY    | CHMP7     | WDFY1    | PTAFR    | SLC16A3  | NFAT5     | NME4     | SLA2     | ZSWIM6   | POU2F2   | SMC5     | PTPN23   | SMEK1    | ARHGFE11 | PCN        | COR7F2  | LYRM7    | SNHG5    | SIRPB2    | 1-Sep      |     |
| 171 | ABHD2    | CD96      | GALNT2   | SIGLEC10 | BMF      | UBOX5     | SMAD7    | EPN1     | RPL6     | KIAA0913 | SH3BP5   | MST4     | ATXN2L   | CLEC4E   | AGAP2      | DDX11   | VENTX    | VENTX    | VENTX     | VENTX      |     |
| 172 | SIRPB1   | GN1L1     | BCL2L11  | CHMP7    | STX7     | CEP170    | ITPR1    | CD300LB  | KIF13B   | MFSD10   | BCL2     | CCM2     | RPL15    | HLA-H    | PTGES3     | AGTRAP  | SIRP     | PLEKHG4  | FNIP2     | 1-Sep      |     |
| 173 | TNFSF13B | PSIP1     | RPL212   | ABLIM1   | GCH1     | KHLH18    | PI3      | CD86     | FAM91A1  | AP2A1    | TGFBF3   | HP51     | MST4     | GNB2     | MDM1       | PSTPM1  | FBX1L6   | CACNA1I  | MYD88     | 1-Sep      |     |
| 174 | FBX15    | RPN2      | ALDH2    | RELT     | KIAA1598 | KLHL18    | PI3      | CD86     | FAM91A1  | AP2A1    | TGFBF3   | HP51     | MST4     | GNB2     | MDM1       | PSTPM1  | FBX1L6   | CACNA1I  | MYD88     | 1-Sep      |     |
| 175 | IFNGR2   | PAG1      | LTA4H    | MAPK4    | PLSCR1   | PRKAG2    | PPP2R2B  | UROD     | DAMM1    | SPPL2B   | GFBR8    | H5A5     | THEMIS   | ABR      | NUMA1      | PRAM1   | KHL14    | LILRA3   | CLEC12B   | 1-Sep      |     |
| 176 | LILRA5   | IL32      | EMILIN2  | ITGB2    | PLXDC2   | ZBED6     | PPP2R4   | CIAPIN1  | NORF102  | ACAP3    | HMGNA    | TNIP1    | SH3LB1   | MID1P1   | PPP3C      | ALDH3B1 | SKAP1    | SORSB3   | RIN2      | 1-Sep      |     |
| 177 | SH3BGR1  | 1-Sep     | ILF2     | IMPDH1   | ZNF710   | KRAS      | SMCR7    | ATRIP    | CBP110   | MGRN1    | TNKS2    | CTDSP1   | G3BP2    | RB1CC1   | TRA2B      | LHFPL2  | INPP5E   | AKTIP    | MOBK2B    | 1-Sep      |     |
| 178 | ANPEP    | KIAA1147  | RPS5     | RASGRP4  | FES      | TR14      | JAKMIP2  | TA1F2    | ITGAV    | NR1H2    | SH3GLB1  | TOM1     | CDK17    | SMARCA5  | DKP4       | GCH1    | LRF33744 | GSTO1    | SETD1A    | 1-Sep      |     |
| 179 | ATP11A   | CND2      | RPL9     | CUL9     | ETV6     | SP14      | RICTOR   | NME4     | KHL18    | ORH2     | MST4     | MKL      | POLR2B   | PRR12    | ANKRD28    | PLXDC2  | ZNF559   | HADH     | OSCAR     | 1-Sep      |     |
| 180 | CD9P3    | SG1       | CD63     | 6-Sep    | WDY2     | SLC25A16  | PKP1     | SLFN11   | ADR      | CD89     | PTK2B    | RPK3K3   | FZB1     | ACADSB   | SIGLEC14   | UNC119B | TRAF3    | TRAF3    | TRAF3     | TRAF3      |     |
| 181 | PLXND1   | ZNF266    | ACS11    | CD82     | LILRA2   | C5orf12   | PP1F     | PI3      | CEP192   | EHD2     | FBXW5    | AKNA     | ESRRA    | SEPN1    | RNF144B    | HABP4   | TXLNG    | ALDH3B1  | ALDH3B1   | 1-Sep      |     |
| 182 | FAM49A   | GOLGA8B   | EEF1B2   | FCRLA    | SLC8A1   | ROCK2     | TMEM203  | ALKH6    | GPR18    |          |          |          |          |          |            |         |          |          |           |            |     |





|     |            |           |           |             |             |          |            |          |            |           |
|-----|------------|-----------|-----------|-------------|-------------|----------|------------|----------|------------|-----------|
| 356 | CD33       | FKBP11    | CAST      | KIAA0889    | WIZ         | ZMPSTE24 | ARID3A     | TSEN15   | NCALD      | CCDC112   |
| 357 | PLSCR1     | LRRN3     | LILRB1    | C1orf228    | DGAT1       | CCL4     | MED25      | SF3A3    | CDK16      | G3BP2     |
| 358 | CD300LB    | ERLEC1    | RPL14     | NCKAP1L     | D2HGDH      | SYT11    | AURKAIP1   | KIF21B   | ZNF703     | COMT      |
| 359 | CHP        | PTPN4     | CNCL1L    | FAM113B     | C16orf53    | TAB3     | RBM42      | MAP2K4   | LOC202181  | HIBCH     |
| 360 | LMO2       | SIDT1     | ARL8B     | MANBA       | ADAMTSL4    | SACS     | ABCD1      | MED4     | AURKAIP1   | SMAD2     |
| 361 | CD63       | RPL36AL   | PLEKH2    | CEP68       | SLC25A11    | COX7B    | IMP4       | FXR1     | BTBD1      | MANF      |
| 362 | AB13       | SKAP1     | MAN2B1    | LUC7L       | ERF         | CKK      | HOMER3     | NARG2    | AMDH2      | MBLAC2    |
| 363 | SOSTM1     | ARID5B    | IARS      | PRY110      | METRNL      | C1orf9   | SLC25A29   | TIPRL    | LPCAT1     | FAM73A    |
| 364 | RHBD2      | DNMT3A    | SLC43A3   | KIAA0907    | ZBTB17      | EFAH1    | RGS12      | DDX1     | NDOR1      | VARS      |
| 365 | RASGRP4    | ENO2      | C14orf145 | ZNF248      | PIGQ        | ID1      | RABEP2     | GABPB1   | BRF1       | CYB5E     |
| 366 | FGD4       | VCP       | FGD2      | SPATA13     | ZNF574      | ERH      | TSSC4      | RBM8A    | CHPF2      | SEC61G    |
| 367 | COL4A3BP   | ISG20     | CAPG      | FCGBP       | SEPN1       | NCALD    | BCL3       | NAA30    | HECTD3     | SCR19     |
| 368 | MYCL1      | RPA1      | ADPRH     | NFRSF13C    | NT5C        | ST13     | CAST       | ACTR10   | YIPF3      | ACTR10    |
| 369 | KFZp761E11 | WWP1      | KDM1B     | RP57        | RREB1       | KIAA1715 | S1PR4      | PSMA2    | ZBTB17     | PSMC2     |
| 370 | PYGL       | KAT2A     | SLC31A1   | ST14        | CDK16       | MED4     | SLC19A1    | EFAH1    | MICAL1     | BCAP29    |
| 371 | TET2       | MTERFD2   | LPCAT2    | BTX         | AURKAIP1    | GLCL     | OPLAH      | TOMM20   | LINGO3     | SPPL2B    |
| 372 | ZNF185     | ZNF33B    | DMXL2     | OSBPL11     | ARID3A      | AIMP1    | SLC35A2    | LANCL1   | RREB1      | YAF2      |
| 373 | ATG3       | PPP1R3E   | PRDX2     | TMEM50B     | PDLIM7      | MDH1     | LAMTOR2    | FBXO33   | RNH1       | AAMP      |
| 374 | NFE2       | MFHAS1    | CFP       | SIRPA       | AGAP3       | ATP5H    | MEN1       | ACADM    | STOM       | BCL2A1    |
| 375 | RNF13      | FAM100B   | NAIP      | CD36        | TSSC4       | TSEN15   | WDR18      | TTC39C   | COBRA1     | STAT4     |
| 376 | B4GALT5    | DDHD2     | POLR2D    | SLC37A2     | CLDN15      | UCHL5    | PIGQ       | ABHD13   | SLC1A5     | SIPA1L3   |
| 377 | ALDH3B1    | ALDH1     | SLC20A1   | UNC93B1     | NDUF57      | ACAD5B   | RRA3C      | PCPD1    | DNASE1L1   |           |
| 378 | TMEM176A   | H2AFV     | TMEM176A  | PLAGL3      | FBXL15      | UBE2D2   | GPA1       | SLMO2    | ARL6IP4    | DPY30     |
| 379 | EPST11     | ZMYND11   | C2        | ZNF721      | CES2        | OAT      | ATG2A      | CNC      | IMP4       | USP47     |
| 380 | AGTRAP     | RNF19A    | KYNU      | LILRA2      | LRRRC33     | SLMO2    | LTPB4      | ISCA1    | C10orf125  | C2orf69   |
| 381 | LACTB      | CD59      | C8orf80   | ELF4        | DNASE1L1    | SH2D1A   | GTBP2      | SRP19    | SPATA2     | CYC1      |
| 382 | SLC20A1    | PRKCQ     | FAM49A    | CBFA2T3     | KLHL17      | SRP19    | DNM2       | C2orf69  | SH2D1A     | DGAT1     |
| 383 | WDFY1      | ATP13A1   | SMARCD1   | CD79A       | MCOLN1      | MAGT1    | MOGS       | USP38    | GABPB1     | LRRC41    |
| 384 | VAMP3      | ZNF831    | CDK6      | RASSF4      | MXD3        | SF3A3    | FGFRL1     | NUS1     | SIVA1      | RPS6KB2   |
| 385 | PNPLA6     | KIAA0907  | TCN2      | KIF13B      | KDEL1       | POMP     | CYP2S1     | PBRM1    | DPP7       | DPH3      |
| 386 | EIF2C4     | CCDC64    | FAM69A    | SLC9A3R1    | TT31        | FGFBP2   | BTBD2      | PTPN11   | DNAJC4     | MEN1      |
| 387 | P2RX7      | ANKRD28   | ATP50     | CORO2A      | WDR18       | IGBP1    | CCDC9      | COPS2    | ERCC1      | CD47      |
| 388 | MIS18BP1   | PDE4B     | SIRPB1    | CCDC64      | WHSC2       | UBE2G1   | SIVA1      | FANCI    | NUCKS1     | CARM1     |
| 389 | RILPL2     | ADARB1    | IDH1      | C10orf105   | LINGO3      | CDK17    | HECTD3     | TBL1XR1  | GLCL       | CUL3      |
| 390 | SGALNACT   | MAGED1    | DENN1D1A  | KLHL3       | RNGFI       | BCAP29   | ZC3H3      | ACAD5B   | TP53I13    | GPR172A   |
| 391 | FAM105A    | ZNF337    | POLR2L    | AEBP1       | Z04D4       | CSNK1G3  | PDLIM7     | YAF2     | PLAC8      | ID11      |
| 392 | HEX3       | FAM13     | HAX1      | TYX3        | MTTR14      | PSP1     | MID1P1     | TTC3     | AP2A1      | COMMD2    |
| 393 | SFA2       | GALT      | HIBCH     | ZNF831      | IL17RA      | RBM34    | C10orf125  | CEP57    | DNM2       | CCDC47    |
| 394 | BR3        | SSR4      | DERL2     | FBXO44      | ECH1        | HSD17B12 | KATNB1     | EIF3M    | ATP11B     | LOC642852 |
| 395 | OGFR       | BACH2     | ALG5      | ULK3        | SAMD1       | ITM2A    | DDR1       | SLC4A10  | E4F1       | AIP       |
| 396 | ARHGAP31   | CAMK4     | WFS1      | PPP1R2      | CCDC9       | NUS1     | GSK3A      | CCT8     | APPL1      | MAGT1     |
| 397 | ETV6       | SIRPG     | TXNL4A    | C9orf72     | HMGXB3      | VBP1     | G6PC3      | ERH      | PRPF19     | C9orf46   |
| 398 | LGALS2     | CUL9      | MEFV      | NHSL2       | RPU5D1      | RNF219   | CDK2AP2    | SLC35D1  | MMP17      | ATG5      |
| 399 | ABR        | CEP68     | SLC7A5    | WDR19       | TOR2A       | TRIM5    | IER5L      | VPS26A   | PDLIM2     | RRAS2     |
| 400 | ZNF710     | CEP120    | MCTP1     | SLC2A6      | USP35       | PTPN2    | ERF        | CUTC     | CYP2S1     | UCHL5     |
| 401 | CLEC4E     | PTPN7     | C17orf28  | TKT         | KLHL22      | USP38    | DPP4       | IBTK     | OAT        | GFP11     |
| 402 | CFD        | THEMIS    | PRELID1   | EPN1        | KATNB1      | VEZT     | GPR172A    | ENPP5    | CCDC9      | ABCF3     |
| 403 | RPS6KA4    | GZMK      | SMC4      | VAMP1       | NAGPA       | RNF14    | BANP       | THOC7    | ATP13A2    | KLHL15    |
| 404 | CSTA       | C12orf57  | PAIC5     | KLFB        | PLD2        | TPD52    | AMDH2      | TSN      | PABPC1L    | FAM69A    |
| 405 | MANBA      | C15orf117 | CD86      | H2AFY       | DHPS        | PPP3CC   | KLHL17     | RALA     | SLC19A1    | GNAT3     |
| 406 | OGFRL1     | PPP3CC    | NDST1     | ZNF516      | RFNG        | NCAM1    | LOC202181  | BCL2A1   | ZNF574     | CTTB8     |
| 407 | DENN1D1A   | NUCB2     | FAR1      | MTERFD2     | CHMP6       | ELMO2    | SPATA2     | LYPLA1   | POLR2J     | PNPLA2    |
| 408 | GLB1       | AGAP2     | ALDH1L2   | NLRP12      | ZDHHC24     | SETD3    | EHMT2      | CASB     | C5orf22    | CD2       |
| 409 | ICAM1      | TMEM50B   | FAM105A   | SLC35E2     | ZNF703      | SMU1     | SAMD1      | SERP1    | TOM1       | MICALL1   |
| 410 | CEBPA      | SMARCD1   | TICAM1    | ARID5B      | CCS         | MSL2     | IRF2BP1    | ELMOD2   | G2E3       | RNF14     |
| 411 | MPP1       | CD81      | SRC       | CENPK       | RNPEP       | DDX1     | KPTN       | GPR160   | WDR18      | ROGDI     |
| 412 | KIAA1598   | LOC283663 | RP2A      | APAF1       | ARHGEP10L   | PPP2R3C  | TMEM129    | SLMAP    | MXD4       | KIAA0232  |
| 413 | FOSL2      | SESN1     | GPBAR1    | FGD4        | ACP5        | RRP15    | ZNF688     | RRAS2    | PAOX       | ANKMY2    |
| 414 | OSCAR      | SND1      | MCPH1     | METTL3      | MMP17       | VAV3     | NOTCH1     | AIMP1    | DDX39A     | DNAJC19   |
| 415 | NLRP3      | PPWD1     | GSTP1     | P2RX5       | PLBD2       | FAM200B  | ABCF3      | ATP5J    | POU2F2     | TSP0      |
| 416 | DAPP1      | GYPC      | FLT3LG    | TPP2        | POLR2J      | LSM3     | USP35      | FKBP3    | PLEKHA1    | HPNAC3    |
| 417 | LRRC33     | FCGBP     | NIPSNAP3A | C2orf29     | SLC16A5     | COMMD2   | C1orf159   | PCNA     | DHPS       | HDAC6     |
| 418 | GPBAR1     | OSBPL3    | RPL13A    | SLC36A1     | BANF1       | PSMC2    | LRWD1      | PM20D2   | UBA1       | HIP1R     |
| 419 | SRGAP2     | MARS      | NDUFB11   | KIAA0748    | ACO2        | SRSF8    | L3MBTL1    | FAM55C   | C11orf2    | MYNN      |
| 420 | CLEC4A     | TGFBR3    | 11-Sep    | OMT3        | BANP        | DDX80    | ZDHHC24    | PTPN2    | CDK2AP2    | BTBD2     |
| 421 | MAPK14     | SRSF8     | BLVRA     | TBC1D2      | LAMTOR2     | KLHL15   | FBXL15     | PRPSAP2  | SLC4A10    | RAB18     |
| 422 | BMF        | THEM4     | PKP       | ZNF94       | CLNG        | NCK1     | JC10028877 | ATG5     | CCDC142    | FAM172A   |
| 423 | OSBPL11    | ITM2A     | GPX7      | THBD        | GGPC3       | THOC7    | EFNB1      | ARPC3    | FAM73B     | FANCI     |
| 424 | TBC1D9     | INPP4B    | ADH5      | ADAT2       | SIVA1       | NARG2    | LCAT       | ARID5A   | SLC35A2    | ZNF286A   |
| 425 | RAB24      | NFRKB     | UBAP2     | GPRASP1     | AMDH2       | LY75     | ABT1       | MANF     | ENTPD6     | METTL18   |
| 426 | FAM65A     | CEP250    | BCKDK     | PKIG        | NCDN        | ATP5J    | ROMO1      | CDK6     | PIGQ       | RALY      |
| 427 | DOCK5      | CPNE5     | ANKRD28   | ZNF671      | LOC284837   | NDUFA1   | MICALL1    | PITPNB   | IRF2BP1    | RNF219    |
| 428 | MARCO      | USP36     | VAMP3     | PLEKHG1     | EEDP1       | C12orf11 | MAEA       | RNF14    | JC10028877 | ELMOD2    |
| 429 | SUSD1      | FAM55C    | LSM6      | FKBP15      | MLYCD       | TTC39C   | EEDP1      | ERO1L    | KPTN       | RAD23A    |
| 430 | NAIP       | GRAMD1A   | FLVCR2    | IKZF3       | ZNF688      | LYAR     | HPS6       | LSM3     | RGS12      | SLC16A5   |
| 431 | TCF7L2     | ZNF507    | FBXO6     | KCTD5       | PCBP4       | SCAMP1   | PYCR1      | ATP6AP2  | CMC1       | SF3A2     |
| 432 | HOOK3      | RTKN2     | C12orf23  | LOC439949   | SPATA2      | C2orf69  | IGSF8      | VEZT     | ZNF688     | GVNIP1    |
| 433 | ARSD       | SH2D1A    | SBDS      | APOBR       | CHPF        | GABPB1   | ZNF574     | NDUFA1   | SH3GLB1    | COPE      |
| 434 | CSDA       | CD79B     | TGFBI     | JC100288069 | IER5L       | ARV1     | CLDN15     | RGS9     | C9orf139   | CLN6      |
| 435 | IMPDH1     | FGHSD1    | CNPY2     | PKFB4       | EFN1        | MRPL42   | ZNF703     | COMMD2   | CKNK6      | CAPG      |
| 436 | CARD16     | NOP58     | RP1       | BMF         | IMP4        | MRPL3    | MAP3K10    | CSNK1G3  | DVL1       | OPLAH     |
| 437 | MS4A14     | C19orf10  | EBP       | IPCEF1      | CKK6        | RALY     | ALP116A1   | ALP116A1 | MAM1       |           |
| 438 | SGMS2      | LTPB4     | SPG21     | TTL4        | C1orf159    | ZNF271   | RPP25      | KIAA0232 | NDUF57     | C8orf35   |
| 439 | HNMT       | RPN1      | SDC3      | MAFB        | SETDB1      | SEC61G   | FBXL8      | PDE6D    | KLRC1      | RGS9      |
| 440 | LILRB4     | GATAD2B   | APOBEC3A  | CD1D        | EPB42       | C5orf22  | CCDC142    | C1orf9   | RFNG       | EPB42     |
| 441 | EMR1       | METTL3    | SPCS2     | WWP1        | LRWD1       | MPHOSPH6 | ATOH8      | TCEB1    | HDAC5      | HOMER3    |
| 442 | HHEX       | KIAA1430  | FOLR3     | C2orf89     | CCDC142     | BLOC1S2  | PDCD1      | GABPA    | FAM160B2   | GPCC3     |
| 443 | BST2       | FAM160B2  | CORO1C    | ZSWIM6      | PAOX        | RPL23A   | POLR2J     | C6orf35  | SLAMF6     | MAPK8IP3  |
| 444 | TLR5       | SNHG1     | SLC1A5    | SKAP1       | ROMO1       | TCEB1    | CO2        | METTL18  | C10orf84   | SETDB2    |
| 445 | PDLIM5     | UBE2D2    | TTCTA     | STRN4       | ANPEP       | KLRC1    | KIAA0664   | ARSK     | ABCD1      | NFKB2     |
| 446 | STX7       | LOC253039 | C19orf2   | TCF7L2      | HOMER3      | PRP51    | NT5C       | PRP51    | C7orf43    | CASC4     |
| 447 | SLC2A6     | HMGN1     | FUCA2     | CPNE1       | PDCD1       | DPP4     | ZNF444     | IGBP1    | TRIM5      | CCS       |
| 448 | CYP27A1    | BRPF3     | CEP97     | OGFRL1      | SC02        | G2E3     | NUBPL      | CLPX     | SNX6       | TTC32     |
| 449 | NPTN       | DENNDSB   | ZNF639    | SEMA7A      | C9orf139    | TIPRL    | LINGO3     | AMMECR1  | ATOH8      | ZNF687    |
| 450 | MCTP1      | WDR59     | TECR      | CD300LB     | LOC202181   | PM20D2   | ZNF189     | MAPK9    | SC02       | RBMA      |
| 451 | RAB8A      | ZNF864    | C1orf43   | RRM2B       | IMP4        | MRPL3    | MAP3K10    | CSNK1G3  | DVL1       | NOC1      |
| 452 | ADAP2      | SEC24A    | NUMB      | CHD5        | CKK6        | RALY     | ALP116A1   | ALP116A1 | MAM1       |           |
| 453 | ARHGEP10L  | CHD7      | NPTN      | USP11       | L3MBTL1     | ATG5     | GOT1       | DRR1     | C12orf11   |           |
| 454 | FAM129B    | FAM117A   | C11orf75  | USP36       | FBXL8       | CASB     | CHPF       | G2E3     | USP38      | CLDN15    |
| 455 | CMTM3      | ABCD2     | CREB3     | KLK11       | ADAT3       | MYNN     | BRF1       | NDUFA12  | ZMPSTE24   | C8orf38   |
| 456 | SNX30      | ZC3H12D   | CUTA      | PITPNC1     | LCAT        | FAM73A   | TUT1       | DPH3     | EFN1       | GABPA     |
| 457 | LOC284837  | TNIK      | KDEL2C    | MAL         | DDR1        | CHIC1    | C10orf84   | CCDC47   | LCAT       | LYPLA1    |
| 458 | MTMR14     | USP11     | PIP4K2C   | FLJ90757    | IL2RG       | ORTAM    |            | MRPL42   | SMU1       | HGS       |
| 459 | SLC1A5     | PCNXL2    | IP04      | ZNF783      | TNS3        | SLC4A10  |            | PSPC1    | DDX54      | PSPC1     |
| 460 | GAPT       | LANCL1    | ST6GAL1   | ZNF710      | KIAA1107    | NDUFA12  |            | SLC25A32 | USP35      | RTTN      |
| 461 | PID1       | B4GALT3   | PHGDH     | RUNX2       | LOC642852   | LRRCC1   |            | MPHOSPH6 | CHIC1      | POMP      |
| 462 | PYCARD     | OXC1T1    | LGALS3    | PRDM8       | LOC10028877 | SKAP1    |            | DPY30    | ROMO1      | LOC29852  |
| 463 | GLRX       | CAD       | PRKRA     | EXOSC10     | RGS12       | PRPSAP2  |            | PIGK     | FBXL15     | ACAA1     |
| 464 | IDH1       | CDK10     | MYD88     | LAT         | RPP25       | KDSR     |            | MDH1     | AGAP3      | FAM110C   |
| 465 | RRP12      | KIF22     | FKBP2     | VMAC        | PLIN3       | MRPL13   |            | HIBCH    | NAGPA      | PYCR1     |
| 466 | TBC1D2     | ALDH18A1  | ECZ2      | SNAP23      | OPLAH       | MAP2K4   |            | MANEA    | ZNF598     | KLKB1     |
| 467 | NAPA       | DARS      | CD5E      | NUP210      | SLC35A2     | FAF1     |            | KDSR     | WHSC2      | MCOLN1    |
| 468 | SBF2       | PPAPDC1B  | LIMA1     | AKT3        | KPTN        | SLC25A32 |            | RAD17    | SHARPIN    | ALDH3B1   |
| 469 | KYNU       | SFXN1     | SLFN5     | LRRC37B     | PABPC1L     | AKAP5    |            | OC1AD2   | OGDH       | CROCC     |
| 470 | MTMR11     | EXOSC10   | NDUFV2    | KCTD7       | DLG4        | CCDC112  |            | SMAD2    | TSNAX      | POLD4     |
| 471 | RAB32      | C19orf2   | ZAK       | PLCD1       | ATOH8       | RTTN     |            | ZNF286A  | IGSF8      | AMMECR1   |
| 472 | NUP62      | FCRL3     | PTPLAD1   | SNHG12      | SLC35D1     | SLC35D1  |            | LOC29852 | ZNF444     | MDM2      |
| 473 | C1orf43    | TNPO2     | MOXD1     | CDC37L1     | YAF2        |          |            | FAM73A   | GPS1       | NUS1      |
| 474 | SNTB1      | TMEM214   | SAE1      | KIF3A       | ANKMY2      |          |            | RNF219   | KDEL1      | CLINT1    |
| 475 | PISD       | PLEKHA1   | RP2       | INADL       | MANF        |          |            | FAF1     | ADAT3      | TNKS2     |
| 476 | TMX1       | LIG1      | STS       | PRKCH       | BCL2A1      |          |            | ADAM10   | RPP25      | LY75      |
|     |            |           |           |             | ACADM       |          |            | CRAM     | L3MBTL1    | PPP4C     |

|     |           |          |           |             |           |           |          |         |
|-----|-----------|----------|-----------|-------------|-----------|-----------|----------|---------|
| 477 | FBN2      | FBXO44   | KDSR      | FLJ43663    | ENPP5     | MRPS33    | ATRX     | BANF1   |
| 478 | ARL8B     | CD22     | C19orf38  | KCNE3       | HIBCH     | RRP15     | KIAA1107 | TSEN15  |
| 479 | DSE       | ACSL6    | ELOF1     | S100A6      | FAM69A    | SETDB2    | ISCA1    | CRTC1   |
| 480 | LY86      | DLST     | BST1      | PYCARD      | DNAJC19   | ZNF271    | HPCAL1   | HEATR7A |
| 481 | LILRA3    | GATA3    | IGF1      | CDK10       | ABC81     | VBP1      | TOR2A    | TMEM129 |
| 482 | SLC31A1   | IFT80    | MARCO     | BCR         | MANEA     | ANKMY2    | ACP5     |         |
| 483 | HIVEP3    | SRPK1    | NUP37     | AMIGO1      | LOC729652 | BNIP2     | ARPP19   |         |
| 484 | CBFA2T3   | ZNF101   | PNPLA9    | GCF24       | NAO39     | FAM200B   | FBXL8    |         |
| 485 | C2        | PDE4D    | MSR1      | CARHSP1     | ANMECR1   | RTTN      | C16orf53 |         |
| 486 | SLC25A24  | METTL17  | TLR8      | JUP         | ZNF189    | FAM69A    | NCK1     |         |
| 487 | ADAP1     | ATP50    | GPANK1    | VPREB3      | DNAJC15   | FAM110C   | CES2     |         |
| 488 | STX12     | KLHL14   | S100A12   | JC100233209 | GLCC11    | SCAMP1    | FAM200B  |         |
| 489 | CXCL16    | C12orf23 | PPP3CC    | 1-Mar       | CAPG      | C8orf38   | LRRC1    |         |
| 490 | FNIP2     | RPA2     | CD320     | SESTD1      | FAM129B   | GZMM      | CCL4     |         |
| 491 | MTHFD2    | RUNX2    | RPS27L    | LY9         | MSH2      | MLYCD     | MANEA    |         |
| 492 | C9orf167  | ZNF767   | SLC30A1   | ZNF439      | TTCC2     | DNAJC19   | VEZT     |         |
| 493 | BLVRA     | SF3A2    | AGK       | TBC1D17     | MRPS33    | C5orf22   | LANCL3   |         |
| 494 | PATL1     | ODF2L    | MFF       | SLC2A1      | PDE6D     | PSD4      | CHPF     |         |
| 495 | NPL       | ASNS     | MBD2      | EPHA1       | RRAS2     | MBLAC2    | IBTK     |         |
| 496 | CAMK1     | PRDX2    | ADAMTSL4  | ZFP3        | NUBPL     | MRPL13    | TMEM8A   |         |
| 497 | CD300C    | INADL    | TBXAS1    | CAMKK2      | PCNA      | NRIP1     | TIPRL    |         |
| 498 | RIN2      | OSBP17   | UBE2D2    | WDR24       | NCO1      | KLHL15    | TBC1D10C |         |
| 499 | PLN3      | FCRL5    | SFXN1     | RPL35A      | DNAJC24   | TAB3      | HSO17B12 |         |
| 500 | RELT      | EPHA4    | GOT2      | PRKACB      | C6orf35   | BCAP29    | RAVER1   |         |
| 501 | ARSB      | SH3GLB2  | ARHGAP5   | CD5         | GPR160    | DRAP1     | VPS26A   |         |
| 502 | CALHM2    | SP140    | KLRB1     | KSR1        | DPY30     | EPB42     | EEDP1    |         |
| 503 | ZSWIM6    | COL18A1  | RPL10A    | SRSF8       | ISCA1     | METRNL    | PLBD2    |         |
| 504 | RTN1      | USP53    | ZCCHC17   | TNIK        | FBXO33    | COX7B     | RPUSD1   |         |
| 505 | TCN2      | CCNC     | CREG1     | SLC2A4RG    | ARSK      | LANCL3    | PCBP4    |         |
| 506 | UHRF1BP1L | AP3M2    | C12orf75  | LAT2        | C9orf46   | KIAA1107  | POLD1    |         |
| 507 | FBP1      | OBFC1    | KLHL8     | LOC93622    | RG59      | SCFD1     | PARP10   |         |
| 508 | BLVRB     | HAUS5    | LACTB     | ANKRD50     | FAM110C   | BCLAF1    | TRAF7    |         |
| 509 | PNKD      | TSEN54   | LTBR      | MCOLN1      | RBM8A     | MXD4      | TCEB1    |         |
| 510 | HVCN1     | PLXDC1   | C15orf57  | ZNF14       | MBLAC2    | AGF1      | EFHA1    |         |
| 511 | APOL1     | SNHG8    | CD33      | ACSL6       | METTL18   | NARS      | PPDPF    |         |
| 512 | FLVCR2    | DERL3    | TMEM167A  | MKL2        | OClAD2    | ASB3      | ASB3     |         |
| 513 | LEPROT    | ZNF107   | XKRF21    | RAB39       | ZNF286A   | C9orf46   | ARSK     |         |
| 514 | ETS2      | EIF2AK3  | TMEM106C  | NEK8        | CUTC      | BLOC1S2   | CPSP3L   |         |
| 515 | SMARCD3   | CD8B     | MRPL9     | GZMK        | C8orf38   | PJAJ2     |          |         |
| 516 | KIF13A    | EIF5B    | UXT       | PXK         | CCT6B     | ARV1      |          |         |
| 517 | FZD1      | KIAA1310 | NCEH1     | TRIB2       | LANCL3    | TP53I13   |          |         |
| 518 | TK2       | PITPNC1  | HNMT      | METRNL      | GOT1      | ST13      |          |         |
| 519 | ATG7      | SPCS1    | TXNDC15   | ATP6V0A1    | LOC389906 | DNAJC24   |          |         |
| 520 | ANKRD50   | CXCR3    | PIM1      | RPS19       | ASB3      | LOC389906 |          |         |
| 521 | NHSL2     | SLC26A11 | SLC25A23  | ZMYND11     | C10orf125 | MXD3      |          |         |
| 522 | GYG1      | HMOX2    | CRTAP     | JC100216545 | CYP251    | OSBPL7    |          |         |
| 523 | FAM110A   | SP4      | GALK2     | MAP3K6      | RRAGC     | ADAT3     |          |         |
| 524 | EPN1      | C3orf37  | VOPPP1    | RNA5E2C     | ERCC1     | CCT6B     |          |         |
| 525 | C11orf75  | ADH5     | CSTA      | FLJ10038    | FANCI     | NQO1      |          |         |
| 526 | WDFY4     | CUTA     | LATS2     | TBC1D9      |           | DNAJC15   |          |         |
| 527 | C17orf67  | P2RY10   | PID1      | SNX30       |           | PCBP4     |          |         |
| 528 | TMFSF13   | SQCS2    | GPRC5D    | MFHAS1      |           | TTCC32    |          |         |
| 529 | ANXA4     | KCTD7    | QPCTL     | DCTN4       |           | EIF2S1    |          |         |
| 530 | PFKFB4    | GSDMB    | C19orf53  | NAA40       |           | FZR1      |          |         |
| 531 | KIF13B    | ICOS     | SLC2A5    | THEM4       |           | MAN2B2    |          |         |
| 532 | ITPRIPL2  | LUC7L    | RAB30     | NBPF10      |           | YPEL3     |          |         |
| 533 | OC1001290 | PREB     | CLCC1     | CD28        |           | KLHL22    |          |         |
| 534 | CLEC4D    | MYO1D    | ARL4C     | CEP250      |           | DDX39A    |          |         |
| 535 | HRH2      | DNAJB11  | BHLHA15   | STX12       |           | ELL       |          |         |
| 536 | SLC46A2   | POU6F1   | CDR2      | CDC42BPB    |           | CCDC112   |          |         |
| 537 | ACER3     | VOPPP1   | ACP2      | ATF7IP2     |           | PAOX      |          |         |
| 538 | ADAM9     | COBLL1   | MAGEH1    | IT6GALNAC6  |           | HMGCS1    |          |         |
| 539 | SERPINB6  | CENPK    | MRPL1     | PTPN4       |           | TRPV2     |          |         |
| 540 | STS       | GFPT1    | MRPL46    | MS4A7       |           |           |          |         |
| 541 | SIGLEC7   | ARHGAP5  | NIP1A     | CTSF        |           |           |          |         |
| 542 | SLC39A1   | OC1AD2   | CYFIP1    | TTYH2       |           |           |          |         |
| 543 | SESTD1    | BLK      | C16orf57  | CLDN1       |           |           |          |         |
| 544 | STRN4     | DZIP3    | CPM       | SGK223      |           |           |          |         |
| 545 | MAML3     | C9orf95  | ZNF614    | LEPROT      |           |           |          |         |
| 546 | PNPLA8    | S100PBP  | CCDC91    | LPIN1       |           |           |          |         |
| 547 | FOLR3     | MORC2    | RPL7      | DNMBP       |           |           |          |         |
| 548 | HSPA7     | MANEA    | CLEC4A    | LDLRAP1     |           |           |          |         |
| 549 | RHOA      | TECR     | DSE       | DGKG        |           |           |          |         |
| 550 | PRELID1   | FBXW4    | RPL7A     | SYNJ2       |           |           |          |         |
| 551 | TJP2      | PLCH2    | OXNAD1    | ALDH3B1     |           |           |          |         |
| 552 | ATP10D    | SIT1     | GBA       | Cxorf57     |           |           |          |         |
| 553 | SERPINB8  | DCAF16   | SBF2      | C11orf35    |           |           |          |         |
| 554 | LAMTOR1   | NIPA1    | HMGN1     | CALHM2      |           |           |          |         |
| 555 | FUCA2     | SLC2A4RG | ITM2A     | PPARGC1B    |           |           |          |         |
| 556 | MSR1      | LAMC1    | TPMT      | LILRB2      |           |           |          |         |
| 557 | GNA15     | ZEB1     | ATP10A    | TNPO2       |           |           |          |         |
| 558 | ATP6V0A1  | PLEKHB1  | FER1L4    | EPHK1       |           |           |          |         |
| 559 | ROGD1     | LPCAT4   | PGAP1     | SP140       |           |           |          |         |
| 560 | ACVR1B    | HAX1     | IQCG      | CDKN1B      |           |           |          |         |
| 561 | KLHL8     | NAE1     | PYCR1     | MORC2       |           |           |          |         |
| 562 | KLHL18    | EPHX2    | CXCR3     | GLCE        |           |           |          |         |
| 563 | SASH1     | SAE1     | C12orf11  | PPWD1       |           |           |          |         |
| 564 | HSBP1     | BCL2L11  | CNTLN     | SSF2A       |           |           |          |         |
| 565 | CTBP2     | ZNF529   | NTAN1     | GT2H4       |           |           |          |         |
| 566 | ERLIN1    | PRMT1    | CCDC149   | STX6        |           |           |          |         |
| 567 | DRAM1     | CA5B     | CCND2     | FBXO3       |           |           |          |         |
| 568 | KLF11     | LTK      | THEMIS    | JC100506548 |           |           |          |         |
| 569 | ASGR2     | PFKP     | UNKRD36BP | SPINT1      |           |           |          |         |
| 570 | CTSL1     | TBC1D17  | MED7      | LRIG1       |           |           |          |         |
| 571 | FRY       | CBLB     | CNKSR1    | CD8B        |           |           |          |         |
| 572 | CDKN1A    | ORH1     | FAM84B    | TCEAL3      | CD88      |           |          |         |
| 573 | CD101     | SLAMF1   | ZDHHC7    | SCN3A       |           |           |          |         |
| 574 | TTYH2     | VSIG1    | CCNB1     | PWWP2B      |           |           |          |         |
| 575 | TPMT      | NTSE     | HK2       | COG1        |           |           |          |         |
| 576 | CD151     | DUT      | SLC16A14  | SLC43A2     |           |           |          |         |
| 577 | C16orf57  | ATP6V0E2 | ERLIN1    | ICRNA00188  |           |           |          |         |
| 578 | DIAPH2    | AXIN2    | TMEM150B  | TTCC28-AS1  |           |           |          |         |
| 579 | SCARF1    | FCRL1    | NOMO2     | RHOH        |           |           |          |         |
| 580 | ABCD1     | ZNF274   | NKIRAS2   | CUEDC1      |           |           |          |         |
| 581 | Cxorf21   | UXT      | SNTB1     | PRKACA      |           |           |          |         |
| 582 | STX6      | GNL3     | FNIP2     | FAM20C      |           |           |          |         |
| 583 | JDP2      | PAICS    | FMNL2     | CDA         |           |           |          |         |
| 584 | LIMK1     | EIF2D    | PARP2     | SNHG1       |           |           |          |         |
| 585 | LAT52     | SPIN3    | LILRA1    | ATP6V0C     |           |           |          |         |
| 586 | FLJ90757  | NR2C1    | OSBPL3    | ISYNA1      |           |           |          |         |
| 587 | FCAR      | AMIGO2   | NLR4      | KCTD21      |           |           |          |         |
| 588 | NEK6      | GOLGA7B  | RTF4      | ZNF101      |           |           |          |         |
| 589 | NKIRAS2   | AMZ2     | TGFBR3    | KAT2A       |           |           |          |         |
| 590 | ZAK       | COG1     | FKBP3     | C9orf167    |           |           |          |         |
| 591 | ACPP      | SLC35D1  | ADAM15    | IQSEC2      |           |           |          |         |
| 592 | LYL1      | 11-Sep   | ZNF525    | SRPK1       |           |           |          |         |
| 593 | KSR1      | QSOX2    | RUVBL1    | INO80E      |           |           |          |         |
| 594 | CPM       | ZNF84    | PCID2     | SP4         |           |           |          |         |
| 595 | ARRDC4    | KLHL3    | PHF10     | GSDMB       |           |           |          |         |
| 596 | NLN       | SYNJ2    | TMEM205   | PRKD2       |           |           |          |         |
| 597 | CPNE8     | SLC25A42 | LILRA6    | ABCD2       |           |           |          |         |

|     |           |           |            |             |
|-----|-----------|-----------|------------|-------------|
| 598 | PLBD2     | PCID2     | JCRNA0015: | CLIP2       |
| 599 | AGAP3     | ATP10A    | REXO2      | WDR73       |
| 600 | RNF135    | PLCD1     | GLA        | PTGIR       |
| 601 | NCKAP5L   | FAN1      | C11orf48   | NR1D1       |
| 602 | VRK2      | ZNF737    | CHST12     | LMO7        |
| 603 | ADPRH     | SRPRB     | RF33       | ZNF507      |
| 604 | VAV2      | CDC66     | MAG0HB     | DAPK1       |
| 605 | INSR      | LSR       | BTN2A2     | CNKS2R2     |
| 606 | MLX       | FCHO1     | PKHD1L1    | LILRA5      |
| 607 | DOK1      | MYBBP1A   | MEI1       | FAN1        |
| 608 | TICAM1    | FAM134B   | HMOX2      | ZNF251      |
| 609 | LPPR2     | GORASP2   | C19orf12   | ANKS6       |
| 610 | MOSC1     | SPATS2    | OC10018894 | D4S234E     |
| 611 | NBPF10    | PRPS1     | SMARCD3    | ERMAP       |
| 612 | RELB      | LRRC8A    | TLR4       | OGFR        |
| 613 | ARL8A     | NR3C2     | ZFAND5     | AKTIP       |
| 614 | SCLT1     | SNRPA     | CDC42EP1   | UBE2W       |
| 615 | CDC42BPB  | TTC9      | SRGAP2     | IKBKAP      |
| 616 | ATP6V1F   | SDF4      | PILRA      | HOOK2       |
| 617 | ITSN1     | D4S234E   | TYROBP     | GGT7        |
| 618 | ZNF516    | GGT7      | SUSD1      | KFZp761E198 |
| 619 | FAM102B   | ZNF721    | SLA2       | MYBBP1A     |
| 620 | SDC3      | DPH5      | TM6SF4     | FAM134B     |
| 621 | ST14      | SLC25A23  | RILP       | DHRS3       |
| 622 | FIG4      | TXNDC5    | BLMH       | C7orf58     |
| 623 | THBD      | GCNT4     | SKAP2      | MERTK       |
| 624 | UBE2W     | AGFG2     | LOC254128  | TTC16       |
| 625 | FGD6      | GNB5      | RPS25      | KCNH8       |
| 626 | UNC119    | FLJ10038  | RASGRP3    | GOLGA7B     |
| 627 | C2orf18   | NT5DC1    | SERPIN86   | PLXNA1      |
| 628 | SLC22A15  | TRMT2B    | RAPGEF5    | PLCH2       |
| 629 | ACP2      | TAF1D     | SLC39A8    | FES         |
| 630 | SLC30A1   | AGK       | DRAM1      | PRKCA       |
| 631 | IQSEC2    | GOT2      | ELAC1      | NRF1        |
| 632 | BCAT1     | HAPLN3    | CLEC12A    | ARL8A       |
| 633 | PPARGC1B  | BTLA      | ITGA3      | PRKCC       |
| 634 | GALNT2    | C12orf75  | CUTC       | KLF12       |
| 635 | DCTN4     | MFG5B     | RASGRP1    | SNX2        |
| 636 | GADD45B   | SLC39A8   | SNRPA      | TMEM127     |
| 637 | STAC3     | UAP1      | LANCL1     | LOC220729   |
| 638 | BCKDK     | C2orf29   | LPCAT4     | DGCR6L      |
| 639 | EVI5      | RHPN1     | PPP1R16B   | ABCBA       |
| 640 | ARL11     | SFMBT1    | SSPN       | METTL17     |
| 641 | CLIP2     | SEPW1     | RTN1       | NFIC        |
| 642 | CCDC149   | CRELD2    | EML6       | EBF1        |
| 643 | HLA-DQB2  | NAA40     | PARVB      | LAMTOR1     |
| 644 | SPINT1    | C13orf15  | USP30      | NVL         |
| 645 | ZNF703    | SLC41A1   | ZNF324     | VSIG1       |
| 646 | CMKLR1    | NR1D1     | NID1       | DAGLA       |
| 647 | PTGIR     | AEN       | LIPA       | ENO2        |
| 648 | RAB20     | SLA2      | ASGR2      | EMR1        |
| 649 | VPS37C    | SLC38A5   | MSRB2      | SCARF1      |
| 650 | MCOLN1    | RNASEH2C  | LRRC8A     | TCF3        |
| 651 | TTL4      | ASF1A     | SLC41A1    | CD96        |
| 652 | PVR       | AMIGO1    | CADM1      | BCL2L2      |
| 653 | NCEH1     | AKTIP     | LIME1      | SLC30A4     |
| 654 | NIPSNAP3A | SEC61G    | AMIGO2     | ZNF138      |
| 655 | FBXO6     | INO80E    | TNS3       | APBB1       |
| 656 | MYO1E     | STK35     | SLC25A4    | GPR137B     |
| 657 | METRNL    | GPD1L     | ICAM1      | C14orf132   |
| 658 | PDE4A     | SLC2A1    | DGUOK      | PIK3AP1     |
| 659 | ARHGAP21  | FCRL2     | C6orf129   | CBLB        |
| 660 | C7orf58   | ANAPC1    | CD81       | ZNF331      |
| 661 | RRM2B     | HPICAL4   | TCF19      | RPS6KA2     |
| 662 | SLC36A1   | TNFRSF13B | GATA3      | GPR35       |
| 663 | SULT1A1   | DUSP5     | KCN33      | KLHDC4      |
| 664 | CDA       | OSBP10    | TK2        | CCDC57      |
| 665 | RENB      | EPHA1     | MYCL1      | SLC15A3     |
| 666 | OSBPL1A   | WBSR22    | HHEX       | TPM2        |
| 667 | EIF4EBP1  | WDR85     | KLHL18     | GA          |
| 668 | NOTCH1    | ILF2      | C3orf26    | CCDC66      |
| 669 | FAM20C    | GCET2     | SNHG6      | AK1         |
| 670 | HEBP1     | PHF10     | SLC25A24   | CYP27A1     |
| 671 | PXK       | MAGT1     | GOLIM4     | DOCK9       |
| 672 | CECR6     | AK1       | IFI27L1    | OSGEPL1     |
| 673 | GBA       | PKIA      | SALL2      | ZNF815      |
| 674 | KIAA0889  | LOC339290 | RAB20      | USP53       |
| 675 | C8orf83   | BLMH      | HLA-DPB1   | ZNF91       |
| 676 | RIN1      | MEI1      | MTMR14     | RPS6        |
| 677 | FMNL2     | ACVR2B    | CD300C     | SIGLEC7     |
| 678 | DOPEY2    | ZNF783    | PAK1       | GPR133      |
| 679 | TMEM205   | DAD1      | SGALNACT   | MIRAS       |
| 680 | PCTP      | OC1005065 | ANAPC7     | PCNXL2      |
| 681 | TAGLN     | ZNF91     | WASH1      | GPX1        |
| 682 | DLG4      | DBB2      | ABCD1      | TIMP2       |
| 683 | ENC1      | ANAPC7    | SCLT1      | PVR         |
| 684 | LOC121456 | MTMR1     | CMKLR1     | ABCB1       |
| 685 | P2RY2     | MLL3      | ATP10D     | MMP17       |
| 686 | NUDT16P1  | KLF8      | MREG       | IRF5        |
| 687 | C10orf105 | NSUN5P2   | RBMX2      | GNB5        |
| 688 | TMEM150B  | KDSR      | CMAH       | PEMT        |
| 689 | HCCS      | SEC24D    | LSM5       | C13orf15    |
| 690 | RBP7      | CCDC57    | CD247      | OSBPL7      |
| 691 | FXYD6     | IGHD      | SH3PX2B    | FLJ39582    |
| 692 | TMEM144   | CARHSP1   | WDR85      | BLVRB       |
| 693 | FRMD4B    | C5orf59   | H2AFV      | LOC220781   |
| 694 | PYRL1     | NOC3L     | SLAMF1     | ABR3        |
| 695 | FEZ2      | DTX3      | ZNF816     | CD151       |
| 696 | NCF1B     | SLC17A9   | FOLR2      | ACVR2B      |
| 697 | GPR124    | CHPF      | RBBP8      | SLC25A42    |
| 698 | ERMAP     | RINT1     | SIRPB2     | GOLGA2B     |
| 699 | KCTD21    | TCF19     | DOK1       | ORMDL3      |
| 700 | ZBTB47    | SRM       | SASH1      | RBP7        |
| 701 | C6orf211  | TXNDC15   | ACAD11     | MIER2       |
| 702 | PLAGL1    | ACBD4     | PPAT       | FBXO46      |
| 703 | NUBP1     | LIMA1     | PLBD2      | ZNF181      |
| 704 | FNDC3B    | EZH2      | PTPN7      | PLEKHB1     |
| 705 | CDK2AP1   | C6orf105  | KIAA1274   | AGAP3       |
| 706 | PARVB     | FAM69A    | LMO2       | PNKD        |
| 707 | KCTD5     | NOMO1     | FLJ35776   | ATP6V0E2    |
| 708 | MERTK     | UBAP2     | ZNF420     | CACNA1F     |
| 709 | MIRAS     | CAV1      | SLC22A15   | GASS        |
| 710 | CDC42EP4  | GRPEL2    | TSEN2      | ACPP        |
| 711 | GOLIM4    | AK5       | ARHGEF11   | DPH5        |
| 712 | BTN2A2    | GN7       | NAE1       | HAUS5       |
| 713 | ASAP2     | ABC11     | AM22       | CCDC65      |
| 714 | COQ2      | C19orf12  | HRASLS2    | TRMT2B      |
| 715 | NACC2     | GAL3ST4   | NOC3L      | CXCL16      |
| 716 | DAGLA     | PRDX4     | SH3GLB2    | KCTD12      |
| 717 | DCLRE1B   | KLHDC4    | C7orf55    | MPP1        |
| 718 | PPM1D     | TMEM156   | CLEC4D     | ZNF540      |

|     |           |           |          |             |
|-----|-----------|-----------|----------|-------------|
| 719 | CDC42EP1  | MFF       | ITSN1    | LOC339290   |
| 720 | C3orf21   | P2RX5     | NLN      | MLX         |
| 721 | OC1001309 | FKBP3     | SNORA70  | RNF135      |
| 722 | C13orf31  | ADAT2     | TSHZ3    | CD101       |
| 723 | VEGFA     | NSUN6     | C8orf83  | FAM190B     |
| 724 | WWC2      | SLC25A38  | ASAP2    | ZNF75A      |
| 725 | TSHZ3     | SKK223    | RPS14    | SCML4       |
| 726 | RTP4      | C11orf10  | DARF1    | LCK         |
| 727 | PRUNE2    | ISYNA1    | OPTN     | RPS12       |
| 728 | FOLR2     | PITPNB    | C3orf18  | HLA-DQB2    |
| 729 | TNS1      | TPM2      | FBXW4    | LDOC1       |
| 730 | C15orf38  | ATF7IP2   | ANAPC1   | NAAA        |
| 731 | RBBP8     | KANK1     | DACT1    | ZNF43       |
| 732 | NFIC      | TAF9B     | FBP1     | HPCAL4      |
| 733 | FZD2      | SEPHS1    | ANXA4    | GRPEL2      |
| 734 | NRM       | RUVBL1    | TNFSF13  | HIVEP3      |
| 735 | PLD1      | C12orf11  | SMCR7    | EPHA4       |
| 736 | GPR141    | MRPL9     | LAMA5    | GNRH1       |
| 737 | DGKG      | CREB3L2   | LILRA3   | ATP6V0D1    |
| 738 | FAR2      | SLC7A5    | COQ2     | ADAM22      |
| 739 | BCL2L2    | BEX4      | CST3     | NDOD2       |
| 740 | CNTLN     | RASGRP3   | SULT1A1  | DDN1        |
| 741 | COL8A2    | LOC93622  | RASSF6   | CSDA        |
| 742 | PWWP2B    | C17orf28  | IL4I1    | FAM102B     |
| 743 | GLA       | MRPS31    | ZNF202   | UHRF1BP1L   |
| 744 | LRP3      | FBXO3     | POLR3D   | ATP8B2      |
| 745 | SH3PX2B   | PM20D2    | CCR1     | SLFN12      |
| 746 | GLCE      | TMED9     | GNA15    | PLXDC1      |
| 747 | RILP      | KIAA1712  | C11orf80 | NACC2       |
| 748 | C4orf32   | GLDC      | MTMR11   | DPY19L2P2   |
| 749 | GPR137B   | KDEL2     | PRLR     | ACRC        |
| 750 | GALK1     | ZNF639    | ASCL2    | DTX3        |
| 751 | MMP14     | 9-Mar     | DBH      | DIAPH2      |
| 752 | SLC29A3   | USP46     | SEPW1    | ADAP2       |
| 753 | MMP17     | NVL       | MECR     | CDKN2B      |
| 754 | DNM3      | ZFAN2B    | BUB3     | BNIP3L      |
| 755 | ASCL2     | TRAF3IP2  | ZNF185   | C6orf93     |
| 756 | KLHDC8B   | C14orf145 | MAML3    | PHLDA1      |
| 757 | TBC1D12   | GPX7      | TPP1     | MYO1E       |
| 758 | SFXN5     | CNPFY2    | MMP14    | RNF19A      |
| 759 | MSRB2     | NRF1      | NUBP1    | KIAA1430    |
| 760 | LPAR1     | NDUFV2    | VEGFA    | DLEC1       |
| 761 | LIPN      | NDUFB11   | ADAM9    | FGD6        |
| 762 | VASH1     | LOC228392 | TNS1     | OC100130950 |
| 763 | PRLR      | CLCC1     | C6orf105 | CA5B        |
| 764 | ADORA3    | PARP16    | KIAA1370 | ODF2L       |
| 765 | LOC730102 | KIF3A     | FAR5B    | CTU1        |
| 766 | WLS       | LMO7      | POLR1E   | HSBP1       |
| 767 | CLIC2     | PRDM8     | TLR5     | FLJ13197    |
| 768 | SLFN12    | TMEM106C  | CHP      | C3orf37     |
| 769 | NHS       | ZNF75A    | BR3      | EIF4EBP1    |
| 770 | MGC16275  | C3orf18   | CLYBL    | KIAA1712    |
| 771 | CUEDC1    | PTPRM     | RPS29    | KIF22       |
| 772 | IL4I1     | THOP1     | EV15     | FBXL5       |
| 773 | GPR133    | PLAG1     | PARP16   | UBASH3A     |
| 774 | CPEB3     | WDR73     | SLC17A9  | LRP3        |
| 775 | SWAP70    | PTCH1     | STAT4    | ZNF827      |
| 776 | MIER2     | GALM      | THOP1    | ZNF208      |
| 777 | ARHGAP29  | CEP97     | KCNA3    | ASF1A       |
| 778 | MAP3K8    | FCER2     | ASAH1    | ZNF274      |
| 779 | CDKN2B    | GOLGA2B   | FZD2     | CD3G        |
| 780 | CTTNBP2NL | HDDC2     | ITPRIPL2 | CAMK1       |
| 781 | UNC5B     | PRKRA     | TAF9B    | VPS37C      |
| 782 | DNMBP     | CTSF      | AGAP1    | OSBPL10     |
| 783 | GPR35     | AEBP1     | HCCS     | KIAA1324L   |
| 784 | ATOH8     | ZNF251    | RIN1     | HSPA7       |
| 785 | FSCN1     | TCEAL8    | PDE4B    | WNT7A       |
| 786 | MICALCL   | TTC16     | MIS18BP1 | C2orf18     |
| 787 | C9orf47   | FAM129C   | MOSC1    | ATG9B       |
| 788 | SLC1A3    | C11orf80  | SNAP47   | CPEB3       |
| 789 | OC1002880 | EAF2      | LRRN3    | SCRN2       |
| 790 | CD209     | FAM98A    | C15orf38 | ACTR5       |
| 791 | MAP3K6    | RALGAPA1  | ATG7     | RPS6KA4     |
| 792 | UBTD1     | PLXNA1    | TMSB15B  | CTBP2       |
| 793 | HDX       | LOC220729 | PDE4A    | LIPE        |
| 794 | NANP      | RAB30     | NCKAP5L  | MTMR1       |
| 795 | CTU1      | PIP4K2C   | RBM11    | FSCN1       |
| 796 | RPP25     | SCRN2     | SIRPG    | ANKRD23     |
| 797 | CLEC1A    | POLR1E    | TRAF3IP2 | CDHR3       |
| 798 | HNRNP2    | FLJ43663  | DLG3     | JDP2        |
| 799 | MMP19     | PIGSDH    | CYPC     | EPHX2       |
| 800 | NRP2      | LAMA5     | NGF1B    | RELB        |
| 801 | P2RY1     | ZNF671    | PPM1D    | PM20D2      |
| 802 | SEL1L     | CCDC91    | HDDC2    | PCPT        |
| 803 | IMPAD1    | MKL2      | NTN4     | MFG8        |
| 804 | PENT      | LIN54     | CDC42EP4 | C6orf211    |
| 805 | DTX4      | COX7A2    | HERC2    | KIAA0125    |
| 806 | LSM6      | PI4K2B    | FEZ2     | RHBDF2      |
| 807 | RPS6KA2   | CHST12    | LPAR1    | ESYT2       |
| 808 | SCN3A     | DHRS3     | TMIGD2   | PLXDC2      |
| 809 | WDR24     | MORC4     | HLF      | ABO         |
| 810 | ABCB4     | DLEC1     | OC1AD2   | ARRDC4      |
| 811 |           | GTF2H4    | COL6A1   | KIF13A      |
| 812 |           | LSM5      | PRUNE2   | RAB39B      |
| 813 |           | AKT3      | ICOS     | C17orf87    |
| 814 |           | SEMA4F    | GPR141   | FAM100B     |
| 815 |           | TCEA3     | RILPL1   | PDLIM5      |
| 816 |           | SNX22     | MTRF1    | P2RY1       |
| 817 |           | C10orf2   | LGALS1   | FBLN2       |
| 818 |           | CD320     | BCAT1    | FAR2        |
| 819 |           | PPP1R13B  | HAPLN3   | PGD         |
| 820 |           | ZNF815    | ADORA3   | C9orf172    |
| 821 |           | ZNF14     | OSBPL1A  | HRHGEF10L   |
| 822 |           | REXO2     | PLD1     | RHOA        |
| 823 |           | HIBCH     | RIN2     | SF3A2       |
| 824 |           | EBP       | RPGRIPL  | NR3C2       |
| 825 |           | MTHFD1    | OTUD7B   | S100PBP     |
| 826 |           | PCYT2     | MORC4    | SUPV3L1     |
| 827 |           | C21orf91  | DPYSL4   | OSCAR       |
| 828 |           | PTPLAD1   | SIDT1    | FAM129B     |
| 829 |           | SNAP47    | ZSWIM5   | ARL11       |
| 830 |           | MID2      | ZNF256   | BEX4        |
| 831 |           | C11orf48  | CD300LF  | TBC1D12     |
| 832 |           | ZNF827    | PGAP2    | PTCH1       |
| 833 |           | ZNF204P   | KRT1     | CAD         |
| 834 |           | UQCRH     | FRMD4B   | BRPF3       |
| 835 |           | WDR19     | NFAM1    | TJP2        |
| 836 |           | NTAN1     | ANXA6    | PRKCD       |
| 837 |           | CUTC      | KLHDC8B  | IFNGR2      |
| 838 |           | GFOD2     | CAMK4    | SLC35D1     |
| 839 |           | GALNT12   | CELSR3   | LIN54       |

|     |              |          |              |
|-----|--------------|----------|--------------|
| 840 | FARSB        | NANP     | COL8A2       |
| 841 | TTC28-AS1    | CCDC85C  | GPR124       |
| 842 | VMAC         | ASNS     | PLAG1        |
| 843 | FBXO46       | ATO8H    | DOCK3        |
| 844 | CCBL1        | STAC3    | PAIP2B       |
| 845 | ZNF248       | TIGD1    | DLG4         |
| 846 | SNHG12       | ROGD1    | TTNBP2NL     |
| 847 | CRYZL1       | FBN2     | RAB32        |
| 848 | GGH          | P2RX7    | NSUN6        |
| 849 | PLEKHG1      | HRH2     | LRRC33       |
| 850 | ZNF331       | FZD1     | TMEM156      |
| 851 | ZFP3         | NRM      | DLST         |
| 852 | RABAC1       | GCNT4    | CRYZL1       |
| 853 | MTRF1        | DDB2     | ZNF204P      |
| 854 | ACTR5        | ACER3    | CRIP2        |
| 855 | C8orf80      | C13orf31 | MGC16275     |
| 856 | DGUOK        | DCLRE1B  | COL4A3BP     |
| 857 | DERL2        | IFT80    | TBC1D8       |
| 858 | LOC202781    | TCEA3    | GNG7         |
| 859 | SDC1         | HNRNPH2  | GAL3ST4      |
| 860 | CRIP2        | PXMP2    | AGTRAP       |
| 861 | LRRC37B      |          | DZIP3        |
| 862 | ZNF525       |          | ARHGAP21     |
| 863 | CMAH         |          | CEP120       |
| 864 | NTSDC2       |          | PDE4D        |
| 865 | LSM2         |          | NBPF3        |
| 866 | NCRNA00287   |          | C3orf21      |
| 867 | QPCTL        |          | UBTD1        |
| 868 | PHC1         |          | LOC284837    |
| 869 | ANKS6        |          | CLEC1A       |
| 870 | SUPV3L1      |          | ACBD4        |
| 871 | SDF2L1       |          | WLS          |
| 872 | KIAA1324L    |          | FCAR         |
| 873 | TCL1A        |          | GALNT12      |
| 874 | IP04         |          | C9orf95      |
| 875 | RBMX2        |          | SLC25A38     |
| 876 | PAIP2B       |          | LIG1         |
| 877 | FLJ13197     |          | LRRC16A      |
| 878 | SELS         |          | ZNF551       |
| 879 | C19orf53     |          | ZNF107       |
| 880 | ZNF43        |          | LY86         |
| 881 | SBDS         |          | GSN          |
| 882 | PGAP2        |          | LOC646214    |
| 883 | C6orf129     |          | NPAS2        |
| 884 | EDAR         |          | P2RY2        |
| 885 | ZNF708       |          | GPD1L        |
| 886 | APOBEC3G     |          | WWC2         |
| 887 | RAB39B       |          | RENBP        |
| 888 | MCPH1        |          | SLC39A1      |
| 889 | MAGO8B       |          | CDC14A       |
| 890 | WFS1         |          | SLC46A2      |
| 891 | LRRC16A      |          | AEN1         |
| 892 | CXorf57      |          | CPNE8        |
| 893 | KDELR2       |          | CECR6        |
| 894 | ADAM22       |          | MCOLN3       |
| 895 | ZNF551       |          | MICALCL      |
| 896 | TMIGD2       |          | IL13RA1      |
| 897 | OTUD7B       |          | DUT          |
| 898 | DBN1         |          | PHC1         |
| 899 | PARP2        |          | SOCS2        |
| 900 | HOOK2        |          | SFMBT1       |
| 901 | OSGEP1L1     |          | GALM         |
| 902 | DACT1        |          | CEBPA        |
| 903 | DLG3         |          | CENPV        |
| 904 | CCDC85       |          | LAMP2        |
| 905 | DGCR6L       |          | HEBP1        |
| 906 | TMEM25       |          | MTUS1        |
| 907 | POLR3D       |          | TMEM144      |
| 908 | USP30        |          | SEMA4F       |
| 909 | ZNF138       |          | PBX4         |
| 910 | FCRLA        |          | PCYT2        |
| 911 | ZNF202       |          | AXIN2        |
| 912 | ZNF439       |          | MRPS33       |
| 913 | ZNF287       |          | SELM         |
| 914 | SPCS2        |          | SNORD22      |
| 915 | C15orf57     |          | TAF1D        |
| 916 | MOXD1        |          | SPEG         |
| 917 | ANKRD36BP2   |          | CLIC2        |
| 918 | PBX4         |          | RINT1        |
| 919 | FKBP2        |          | GADD45B      |
| 920 | CREB3        |          | RPL34        |
| 921 | ZNF540       |          | ZNF708       |
| 922 | ZNF420       |          | NRP2         |
| 923 | MTUS1        |          | PKIA         |
| 924 | RPL7         |          | FAM84B       |
| 925 | FDIA5        |          | FXYD6        |
| 926 | ANKRD23      |          | UNC5B        |
| 927 | WASH1        |          | FAM171A1     |
| 928 | RPS27L       |          | MS4A14       |
| 929 | NOMO2        |          | LSM2         |
| 930 | LOC100216545 |          | ATP1A3       |
| 931 | SPEG         |          | PVRL1        |
| 932 | CCDC85C      |          | ARSD         |
| 933 | MAGEH1       |          | LOC100128288 |
| 934 | TSEN2        |          | SLC29A3      |
| 935 | ITGA3        |          | ARHGAP29     |
| 936 | LOC100189949 |          | CDK2AP1      |
| 937 | PGAP1        |          | GALT         |
| 938 | ABO          |          | LRRC8C       |
| 939 | FAM171A1     |          | C10orf2      |
| 940 | CLYBL        |          | RPS21        |
| 941 | ALDH1L2      |          | SERPINB8     |
| 942 | LIPE         |          | TSEN54       |
| 943 | PPAT         |          | RAB24        |
| 944 | CDC37L1      |          | NHLRC4       |
| 945 | SLC25A4      |          | KIAA1598     |
| 946 | C14orf132    |          | S100B        |
| 947 | MRPS33       |          | DNM3         |
| 948 | LDOC1        |          | SIGLEC9      |
| 949 | GPANK1       |          | CSGALNACT1   |
| 950 | SSPN         |          | NHS          |
| 951 | COL19A1      |          | AF3M2        |
| 952 | MREG         |          | CTS1L1       |
| 953 | ATG9B        |          | 1-Sep        |
| 954 | DOCK3        |          | PLIN3        |
| 955 | ACRC         |          | MMP19        |
| 956 | TIGD1        |          | CDKN1A       |
| 957 | MRPL1        |          | ETV6         |
| 958 | RAD51C       |          | RILPL2       |
| 959 | CORO2A       |          | RNF13        |
| 960 | ZNF324       |          | C9orf47      |

|      |                 |                 |
|------|-----------------|-----------------|
| 961  | ZNF181          | PFN2            |
| 962  | ALG5            | HAGHL           |
| 963  | ZNF614          | EIF2D           |
| 964  | TNFRSF13C       | ACVR1B          |
| 965  | SALL2           | LIPN            |
| 966  | CENPV           | TRAT1           |
| 967  | ELAC1           | ZBTB47          |
| 968  | CNKSR1          | BCAR3           |
| 969  | IGF1            | RALGAPA1        |
| 970  | EML6            | NUDT16P1        |
| 971  | C7orf55         | ZFAND2B         |
| 972  | ATP1A3          | RNH1            |
| 973  | KLRAP1          | NT5DC1          |
| 974  | NBPF3           | GFOD2           |
| 975  | DNAJC1          | RPL38           |
| 976  | ZNF208          | RAD51C          |
| 977  | CELSR3          | TMEM25          |
| 978  | COL6A1          | PPP1R13B        |
| 979  | C3orf26         | RPP25           |
| 980  | SNORD22         | ZNF287          |
| 981  | SNORA70         | CD209           |
| 982  | ID4             | EDAR            |
| 983  | SELM            | MLLT3           |
| 984  | MRPL46          | RALB            |
| 985  | CACNA1F         | OBFC1           |
| 986  | RFC3            | DNMT3A          |
| 987  | MCOLN3          | ZNF703          |
| 988  | GPRC5D          | MID2            |
| 989  | MED7            | RPL27A          |
| 990  | MECR            | ZNF385A         |
| 991  | GNRH1           | C17orf61-PLSCR3 |
| 992  | CCNB1           | PLAGL1          |
| 993  | PFN2            | FIG4            |
| 994  | IQCG            | PRPS1           |
| 995  | CNKSR2          | AK5             |
| 996  | PSMD8           | INSR            |
| 997  | ZNF256          | AGFG2           |
| 998  | ZNF616          | GALK1           |
| 999  | KCNH8           | USP46           |
| 1000 | KRT1            | B4GALT5         |
| 1001 | HAGHL           | SLC1A3          |
| 1002 | NUP37           | LSR             |
| 1003 | FBLN2           | LOC121456       |
| 1004 | C11orf35        | CCBL1           |
| 1005 | AGAP1           | LOC730102       |
| 1006 | C1orf228        | HDX             |
| 1007 | PKHD1L1         | C12orf57        |
| 1008 | SLC30A4         | PTPRM           |
| 1009 | DPY19L2P2       | KLRAP1          |
| 1010 | PHLDA1          | KANK1           |
| 1011 | CDHR3           | MRPS31          |
| 1012 | C15orf24        | ENC1            |
| 1013 | DBH             | GD2             |
| 1014 | KIAA1274        | NSUN5P2         |
| 1015 | SMCR7           | SIT1            |
| 1016 | PYCR1           | LTK             |
| 1017 | DPYSL4          |                 |
| 1018 | CADM1           |                 |
| 1019 | BHLHA15         |                 |
| 1020 | SLC2A5          |                 |
| 1021 | ELOF1           |                 |
| 1022 | ZSWIM5          |                 |
| 1023 | SLC16A14        |                 |
| 1024 | LOC100128288    |                 |
| 1025 | HLF             |                 |
| 1026 | RILPL1          |                 |
| 1027 | RPRIP1L         |                 |
| 1028 | FER1L4          |                 |
| 1029 | PXMP2           |                 |
| 1030 | NTN4            |                 |
| 1031 | EPPK1           |                 |
| 1032 | NUS1            |                 |
| 1033 | EBF1            |                 |
| 1034 | ACAD11          |                 |
| 1035 | NPAS2           |                 |
| 1036 | LOC254128       |                 |
| 1037 | IFI27L1         |                 |
| 1038 | TMSB15B         |                 |
| 1039 | NCRNA00152      |                 |
| 1040 | NHLRC4          |                 |
| 1041 | BCAR3           |                 |
| 1042 | HRASLS2         |                 |
| 1043 | ZCCHC17         |                 |
| 1044 | S100B           |                 |
| 1045 | RAPGEF5         |                 |
| 1046 | FLJ35776        |                 |
| 1047 | SEMA7A          |                 |
| 1048 | LOC646214       |                 |
| 1049 | C17orf61-PLSCR3 |                 |
| 1050 | GALK2           |                 |
| 1051 | TXNL4A          |                 |
| 1052 | KCNN3           |                 |
| 1053 | RBM11           |                 |
| 1054 | POLR2L          |                 |
| 1055 | NEK3            |                 |
| 1056 | RASSF6          |                 |
| 1057 | PKIG            |                 |
| 1058 | WNT7A           |                 |
| 1059 | C9orf172        |                 |
| 1060 | PAX5            |                 |
| 1061 | FLJ39582        |                 |
| 1062 | LRRC59          |                 |
| 1063 | ZNF117          |                 |
| 1064 | VPREB3          |                 |
| 1065 | KDELR1          |                 |
| 1066 | POLR2D          |                 |

## Supplementary Method– Functional Principal Component Analysis

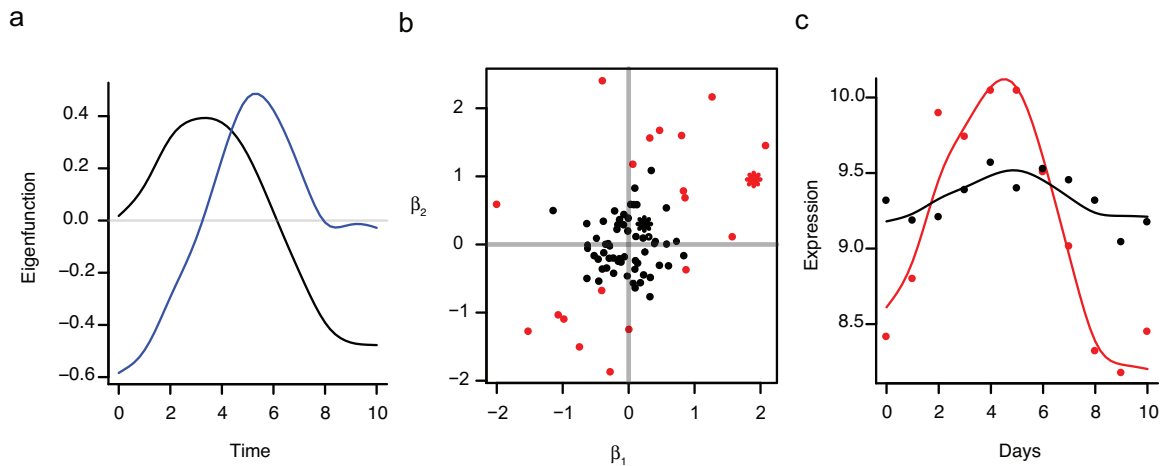

Using functional principal component analysis (FPCA), the expression curve of a gene can be approximated by the equation  $x(t) = \mu + \beta_1\phi_1(t) + \beta_2\phi_2(t) + \epsilon(t)$ , where  $\mu$  is the mean expression level of the gene over time,  $\phi_1(t)$  and  $\phi_2(t)$  are orthonormal eigenfunctions, the coefficients  $\beta_1$  and  $\beta_2$  are the loadings on corresponding eigenfunctions, and  $\epsilon(t)$  represents the unexplained temporal variation. (a) An example of two eigenfunctions (black and blue solid lines). (b) The corresponding loadings for 80 genes are plotted showing temporally differentially expressed genes (red circles), and non-differentially expressed genes (black). When the loadings ( $\beta_1, \beta_2$ ) are located far away from the origin (0, 0), the corresponding gene expression curve has a large deviation from a flat line, i.e., a large signal. In contrast, when ( $\beta_1, \beta_2$ ) are close to (0, 0), the gene expression curve tends to be flatter, i.e., a small signal. Whether a gene is differentially expressed is determined by its signal-to-noise ratio. So genes with large loadings ( $\beta_1, \beta_2$ ) are not necessarily identified as differentially expressed, but they are more likely to be differentially expressed than those with small loadings. (c) Temporal expression data for the two genes labeled as an asterisk “\*” in (B) overlaid with the expression curves estimated using FPCA. Note that the gene represented by the black line, which is not differentially expressed, has a very small variation from baseline, and thus a low signal-to-noise ratio. In contrast, the gene represented by the red line has a large variation from baseline, larger loadings ( $\beta_1, \beta_2$ ) corresponding to the red star in (B) and a higher signal-to-noise ratio.
